# Supplementary material
Source: publisher site journal article supplement (https://www.spandidos-publications.com/7756/downloadSupplementary)
Supplement: Supplementary file 1 [file downloadSupplementary]

## Sheet: Sheet1
Table SII. Metabolic data from the blood of patients with recurrent genital herpes.
Type	ID	MZ	RT	MS2.name	MS2_score	Formula	SuperClass	Class	HMDB	kegg	kegg_pathway	MS1.name	GHP_1	GHP_2	GHP_3	GHP_4	GHP_5	GHP_6	GHP_7	GHP_8	GHP_9	GHP_10	GHP_11	GHP_12	GHP_13	GHP_14	Normal_1	Normal_2	Normal_3	Normal_4	Normal_5	Normal_6	Normal_7	Normal_8	Normal_9	Normal_10	Normal_11	Normal_12	Normal_13	Normal_14	mean	mean_Disease	mean_Normal	FC	regulation	p_value	q_value	VIP	Significant
NEG	NEG_183.102_4.5348	183.102	4.5348	1,3-Bis(hydroxymethyl)-3-methylbicyclo[2.2.1]heptan-2-one	97	C10H16O3	Lipids and lipid-like molecules	Prenol lipids	NA	NA	NA	NA	1.36756e+06	2.62533e+06	603184	3.89763e+06	644933	1.2942e+06	1.84144e+06	4.70429e+06	899225	2.74227e+06	1.36615e+06	1.07025e+06	565611	1.06294e+06	1.30263e+06	957843	933664	787807	933797	548496	790834	628910	2.58219e+06	681117	487017	636651	585963	787915	1.33321e+06	1.76321e+06	903203	1.9522	up	0.0166824	0.116818	1.36298	yes
NEG	NEG_475.326_5.4425	475.326	5.4425	1,4,7,10-Tetratert-butylperylene	97	C36H44	Benzenoids	Phenanthrenes and derivatives	NA	NA	NA	Sorbitan stearate;Sintaxanthin;Diglyceryl monooleate;2,2-Bis(2,3-dihydroxypropyl)octadec-9-enoic acid;beta-Carotinal;Apo-8'-lycopenal;Apocarotenal	490950	204832	80210.2	804836	207979	1.19236e+06	311117	3.13957e+06	255041	338491	495612	1.70556e+06	173268	74055.6	950440	4.32391e+06	2.7446e+06	5.09328e+06	3.22752e+06	1.72843e+06	4.94212e+06	3.12979e+06	224747	388854	280999	1.53003e+06	835954	207928	1.3958e+06	676706	2.1149e+06	0.32	down	0.00901027	0.0757201	2.03173	yes
NEG	NEG_421.227_5.7334	421.227	5.7334	1,4-Dioctyl sulfosuccinic acid	70.68	C20H38O7S	Lipids and lipid-like molecules	Fatty Acyls	NA	NA	NA	Succinic acid, sulfo-, 1,4-dioctyl ester;1H-2-Benzopyran-6-carboxamide, 1-(2-(4-(4-(aminocarbonyl)phenyl)-1-piperazinyl)ethyl)-3,4-dihydro-N-methyl-, (1S)-;N-Lauroyl Tryptophan;Resolvin D2;Resolvin D1;11beta-Hydroxy-3,20-dioxopregn-4-en-21-oic acid;14-Hydroxy-E4-neuroprostane;17-Hydroxy-E4-neuroprostane;20-Hydroxy-E4-neuroprostane;4-Hydroxy-D4-neuroprostane;7-Hydroxy-D4-neuroprostane;Prehumulone;…	19153.5	453975	107483	96832.8	167514	144633	75099.7	79955.9	208525	157021	367598	236898	81698.3	64279.6	166355	201010	504544	71716.9	562710	179057	229252	259729	229007	184756	136416	196034	523211	161190	209488	161476	257499	0.6271	down	0.0356818	0.190456	1.30793	yes
NEG	NEG_265.144_5.6237	265.144	5.6237	1,4-dihydroxy-6,6,9a-trimethyl-4,5,5a,7,8,9-hexahydro-1H-benzo[e][2]benzofuran-3-one	86.79	C15H22O4	Organoheterocyclic compounds	Naphthofurans	NA	NA	NA	Humulinic acid A;Adhumulinic acid;Blennin D;Absindiol;(R)-Athanagrandione;Artemin;10-Hydroxymyoporone;(6beta,8betaOH)-6,8-Dihydroxy-7(11)-eremophilen-12,8-olide;3,14-Dihydroxy-11,13-dihydrocostunolide;Arlatin;1alpha,15-Dihydroxymarasmene;3alpha,15-Dihydroxymarasmene;Arabsin;Alkhanol;(1alpha,4alpha,5beta,6alpha,11betaH)-1,4-Epoxy-5-hydroxy-10(14)-germacren-12,6-olide;1alpha-Hydroxyarbusculin A;Spo…	928952	991500	509841	582918	442116	494689	827631	816113	1.49502e+06	632613	764470	1.05332e+06	545116	93834.7	895030	819250	1.34424e+06	760674	1.73917e+06	981030	745569	544427	830675	1.08795e+06	1.17434e+06	1.09012e+06	748704	1.49205e+06	872548	727009	1.01809e+06	0.7141	down	0.0364661	0.192405	1.1906	yes
POS	POS_299.138_4.7503	299.138	4.7503	1-(2,4-Dihydroxy-6-methoxy-3,5-dimethylphenyl)-3-phenyl-2-propen-1-one	72.9	C18H18O4	Phenylpropanoids and polyketides	Linear 1,3-diarylpropanoids	HMDB0037376	NA	NA	Carisoprodol;Falcarindiol;Panaxydol;1,8-Heptadecadiene-4,6-diyne-3,10-diol;2-Polyprenyl-6-methoxyphenol;1,9-Heptadecadiene-4,6-diyne-3,8-diol, (3S,8S,9Z)-;Patchoulen-beta;Juzirine;Acetoxyacetylaminofluorene;indoprofen;N-Nitrosocimetidine;(-)-Norushinsunine	1.20802e+06	1.47683e+06	1.4252e+06	1.16108e+06	698315	952867	784166	2.47691e+06	1.15005e+06	1.18511e+06	353713	4.05363e+06	4.12287e+06	407797	4.24067e+06	1.85308e+06	4.44327e+06	2.43709e+06	9.80449e+06	1.28707e+06	5.32002e+06	2.95007e+06	1.59159e+06	3.20133e+06	3.49776e+06	2.46965e+06	5.69764e+06	2.13745e+06	2.58528e+06	1.53261e+06	3.63794e+06	0.4213	down	0.000566278	0.0108465	2.05482	yes
POS	POS_455.295_4.5434	455.295	4.5434	1-(4-O-beta-D-glucopyranosyl-3-methoxyphenyl)-3,5-dihydroxydecane	71.24	C25H42O7	Organic oxygen compounds	Organooxygen compounds	NA	NA	NA	24,25-Dihydroxyvitamin D;25,26-dihydroxyvitamin D;Calcitriol;7a,12a-Dihydroxy-cholestene-3-one;24R,25-Dihydroxyvitamin D3;23S,25-dihydroxyvitamin D3;7 alpha,24-Dihydroxy-4-cholesten-3-one;7 alpha,26-Dihydroxy-4-cholesten-3-one;Paricalcitol;Sarsasapogenin;Neotigogenin;Smilagenin;Octadecyl cis-p-coumarate;(24R)-24,25-Dihydroxycalciol;7alpha,25-Dihydroxy-4-cholesten-3-one;Secalciferol;7alpha,24-dihy…	132844	20973.4	111141	339584	54994.9	65634.9	163690	820508	239915	217428	295919	49811.7	192978	68449.2	396856	264640	731898	164362	128414	230013	566207	158092	360010	445438	234928	177628	325731	199236	255619	198134	313104	0.6328	down	0.0197794	0.131389	1.52131	yes
POS	POS_393.239_6.5154	393.239	6.5154	1-Hexadecanoyl-2-sn-glycero-3-phosphate	74.35	NA	NA	NA	NA	NA	NA	CPA(16:0/0:0);Methyl (9Z)-6'-oxo-6,5'-diapo-6-carotenoate;MG(0:0/18:2(9Z,12Z)/0:0);MG(18:2(9Z,12Z)/0:0/0:0);Glyceryl monolinoleate;2-Linoleoyl Glycerol;RIOPROSTIL;3-Oxo-4,6-choladienoic acid;Rimexolone;Antibiotic SB 202742	670065	154212	118222	133706	731469	403338	180480	269897	142089	73848.1	377743	64280.1	95367.1	70604.5	1.08364e+06	679872	1.02528e+06	748084	1.3152e+06	886552	972110	883109	931793	915539	920764	707831	711871	795446	573657	248951	898363	0.2771	down	4.35933e-06	0.000320615	3.0726	yes
POS	POS_298.114_2.9103	298.114	2.9103	1-Methylguanosine	96.63	C11H15N5O5	Nucleosides, nucleotides, and analogues	Purine nucleosides	HMDB0001563	C04545	NA	1-Methylguanosine;2-Methylguanosine;3'-O-Methylguanosine;Nelarabine;2'-C-Methylguanosine;Glutaminylisoleucine;Glutaminylleucine;Hydroxyprolyl-Lysine;Isoleucyl-Glutamine;Isoleucyl-Gamma-glutamate;Leucyl-Glutamine;Leucyl-Gamma-glutamate;Alanyltryptophan;Tryptophyl-Alanine;GHB-Gluc	1.03562e+06	1.1528e+06	983065	1.3281e+06	1.41252e+06	1.18138e+06	1.23223e+06	1.04864e+06	1.41054e+06	1.38441e+06	1.20542e+06	1.04109e+06	1.24209e+06	1.67963e+06	602477	582676	689138	906346	843840	529747	772915	887612	550420	790605	771101	501885	442839	746225	962692	1.2384e+06	686988	1.8026	up	3.23096e-08	6.14436e-06	1.91189	yes
POS	POS_495.363_7.4362	495.363	7.4362	1-O-hexadecyl-2-C-methyl-3-phosphatidylcholine	80.47	C25H54NO6P	Lipids and lipid-like molecules	Glycerophospholipids	NA	NA	NA	beta-Sitosterol acetate;Triptohypol F;Cholesteryl butyrate;4alpha-hydroxymethyl,4beta,14alpha-dimethyl-9beta,19-cyclo-5alpha-ergost-24(241)-en-3beta-ol;Hexosylsphingosine	158527	293494	1.58568e+06	481824	692961	67666	280152	1.99118e+06	866707	430631	232127	1.35595e+06	581056	140365	2.03052e+06	2.19907e+06	1.45699e+06	813829	3.85997e+06	677542	1.93086e+06	2.07668e+06	1.58215e+06	305866	1.08965e+06	1.06943e+06	1.33184e+06	2.18959e+06	1.13473e+06	654166	1.61529e+06	0.405	down	0.00124753	0.0186597	2.18181	yes
POS	POS_476.273_6.8941	476.273	6.8941	1-Palmitoyl-2-hydroxy-sn-glycero-3-phosphoethanolamine	70.2	C21H28O3	Benzenoids	Benzene and substituted derivatives	HMDB0011503	NA	NA	LysoPE(0:0/18:3(6Z,9Z,12Z));LysoPE(0:0/18:3(9Z,12Z,15Z));LysoPE(18:3(6Z,9Z,12Z)/0:0);LysoPE(18:3(9Z,12Z,15Z)/0:0);(9Z,12Z,15Z)-3-Hydroxyoctadecatrienoylcarnitine;(9E,11E,15Z)-9-Hydroxyoctadeca-9,11,15-trienoylcarnitine;(9Z,12Z,15Z)-17-Hydroxyoctadeca-9,12,15-trienoylcarnitine;9-(3,4-Dimethyl-5-propylfuran-2-yl)nonanoylcarnitine;(6Z)-11-(3-Pentyloxiran-2-yl)undeca-6,9-dienoylcarnitine;7-(5-Heptylf…	1.39886e+06	469557	968356	574767	1.08254e+06	443356	541984	678388	354361	738697	394646	592435	903735	807249	735420	249893	580863	290539	524644	662866	550204	414290	390092	419974	369365	343303	501600	550142	590433	710638	470228	1.5113	up	0.00988873	0.0807805	1.14004	yes
NEG	NEG_279.039_1.3943	279.039	1.3943	1-[(2R,3S,5R)-3,4-Dihydroxy-5-(hydroxymethyl)oxolan-2-yl]pyrimidine-2,4-dione	73.16	C9H12N2O6	Nucleosides, nucleotides, and analogues	Pyrimidine nucleosides	NA	NA	NA	Uridine;Pseudouridine;1-[(2R,3S,5R)-3,4-Dihydroxy-5-(hydroxymethyl)oxolan-2-yl]pyrimidine-2,4-dione;1-[(2R,3R,4S,5R)-3,4-Dihydroxy-5-(hydroxymethyl)oxolan-2-yl]oxypyrimidin-2-one;5-Hydroxypyrazine-2-carboxylic acid;TRIMETHYL PHOSPHATE	2.17395e+06	2.80488e+06	2.98212e+06	2.62853e+06	6.39977e+06	3.07567e+06	4.59748e+06	3.02476e+06	5.63948e+06	5.30664e+06	2.249e+06	3.1449e+06	3.53025e+06	4.10679e+06	4.14644e+06	8.25487e+06	7.57047e+06	6.9248e+06	6.6734e+06	5.51973e+06	4.88604e+06	3.68501e+06	6.20379e+06	7.16623e+06	1.00984e+07	5.76545e+06	2.8901e+06	5.64233e+06	4.89612e+06	3.6903e+06	6.10193e+06	0.6048	down	0.000452338	0.00931096	1.49493	yes
POS	POS_532.336_7.316	532.336	7.316	1-heptadecanoyl-sn-glycero-3-phosphocholine	89.54	C25H52NO7P	Lipids and lipid-like molecules	Glycerophospholipids	NA	NA	NA	13-(3,4-Dimethyl-5-propylfuran-2-yl)tridecanoylcarnitine;11-(3,4-Dimethyl-5-pentylfuran-2-yl)undecanoylcarnitine;LysoPE(0:0/20:0);LysoPE(20:0/0:0);LysoPC(17:0/0:0)	1.69839e+06	1.30659e+06	6.18874e+06	1.70565e+06	2.55403e+06	1.05389e+06	1.67769e+06	2.87251e+06	1.14706e+06	1.69283e+06	811370	1.65917e+06	1.64402e+06	2.11124e+06	2.60864e+06	2.15495e+06	2.40733e+06	3.20458e+06	6.08084e+06	2.7435e+06	3.76989e+06	2.27971e+06	4.3926e+06	2.2044e+06	2.03442e+06	2.09958e+06	3.6428e+06	2.57428e+06	2.51145e+06	2.0088e+06	3.01411e+06	0.6665	down	0.00543821	0.0527838	1.33725	yes
POS	POS_264.268_6.2111	264.268	6.2111	1-methyl-4-(oct-7-en-1-yl)octahydro-2H-quinolizine	78.39	C18H33N	NA	NA	NA	NA	NA	Hexadecylamine;Dioctylamine;Dodecylbenzene;Estrane	965580	951664	860577	978117	968145	1.15445e+06	970537	1.28067e+06	1.21063e+06	701853	743788	1.06611e+06	794815	1.10666e+06	1.94988e+06	1.96588e+06	1.95587e+06	1.70209e+06	1.97762e+06	1.90846e+06	1.76386e+06	2.59715e+06	2.21498e+06	2.01058e+06	1.65214e+06	1.99963e+06	1.88221e+06	2.24341e+06	1.48491e+06	982400	1.98741e+06	0.4943	down	1.35819e-11	2.58289e-08	2.16979	yes
NEG	NEG_365.342_8.8098	365.342	8.8098	10,12-Tetracosanedione	81.83	C24H46O2	Organic oxygen compounds	Organooxygen compounds	HMDB0035559	NA	NA	Nervonic acid;(E)-2-Tetracosenoic acid;10,12-Tetracosanedione;7,9-Tetracosanedione;6,8-Tetracosanedione;5,7-Tetracosanedione;4,6-Tetracosanedione;tetracos-15-enoic acid	2.27226e+07	1.15487e+07	2.53227e+07	1.39246e+08	2.60069e+07	2.25436e+07	2.30208e+07	2.41985e+07	2.4141e+07	2.42532e+07	2.36175e+07	2.00076e+07	6.22045e+07	3.97568e+07	9.70299e+06	3.00622e+07	8.98995e+06	1.88337e+07	7.94458e+06	1.4441e+07	1.75435e+07	9.70325e+06	1.38367e+07	2.3568e+07	7.74223e+06	5.56274e+06	1.86141e+07	2.4796e+07	2.49976e+07	3.48993e+07	1.50958e+07	2.3119	up	0.00140383	0.0202907	1.73314	yes
NEG	NEG_215.165_6.0415	215.165	6.0415	10-Hydroxydodecanoic acid	76.37	C12H24O3	Organic acids and derivatives	Hydroxy acids and derivatives	NA	NA	NA	3-Hydroxydodecanoic acid;12-Hydroxydodecanoic acid;(R)-3-Hydroxydodecanoic acid;xi-5-Hydroxydodecanoic acid;2-Hydroxydodecanoic acid;Undecanal;6-Undecanone;10-Undecen-1-ol;(Z)-3-Methyl-3-decen-1-ol;(&#177;)-(E)-3-Methyl-4-decen-1-ol;1-Menthyl methyl ether;trans- and cis-1-Methoxy-1-decene;2-Undecanone;2-Undecen-1-ol;2,8-Dimethylnonan-5-one;Menthol;Decanal;(E)-3-decen-1-ol;2-Decanone;cis-4-Decenol…	883853	686406	1.29644e+06	834817	842022	3.85408e+06	653455	1.13155e+06	2.63048e+06	454712	1.10887e+06	6.34377e+06	595595	362595	7.44583e+06	2.94126e+06	3.35438e+06	2.29432e+06	3.1246e+06	2.64745e+06	2.24124e+06	2.83112e+06	2.38707e+06	5.66309e+06	4.55349e+06	2.67065e+06	5.37543e+06	2.95761e+06	2.57736e+06	1.54847e+06	3.60625e+06	0.4294	down	0.000146194	0.00419476	2.39107	yes
POS	POS_342.263_5.4961	342.263	5.4961	11-Dodecenoylcarnitine	82.36	C19H35NO4	Lipids and lipid-like molecules	Fatty Acyls	NA	NA	NA	trans-2-Dodecenoylcarnitine;(9E)-Dodecenoylcarnitine;4-Dodecenoylcarnitine;11-Dodecenoylcarnitine;5-Dodecenoylcarnitine;7-Dodecenoylcarnitine;8-Dodecenoylcarnitine;2-Dodecenoylcarnitine;3-Dodecenoylcarnitine;6-Dodecenoylcarnitine;Dodecenoylcarnitine;1-Acetoxy-2-hydroxy-16-heptadecyn-4-one	1.06136e+07	4.65787e+06	6.98278e+06	1.21997e+07	5.24514e+06	1.47961e+07	7.96961e+06	4.19021e+06	3.34079e+07	6.23942e+06	3.4148e+06	3.85769e+07	2.85748e+06	2.3692e+06	2.30739e+07	1.76013e+07	5.93422e+07	1.32241e+07	3.20058e+07	2.52309e+07	1.434e+07	2.00601e+07	1.18594e+07	2.97837e+07	3.64498e+07	1.80261e+07	3.71096e+07	4.23175e+07	1.90695e+07	1.09658e+07	2.71732e+07	0.4036	down	0.00020485	0.00540695	2.36484	yes
POS	POS_360.274_5.2172	360.274	5.2172	11-Hydroxydodecanoylcarnitine	87.88	C19H37NO5	Lipids and lipid-like molecules	Fatty Acyls	NA	NA	NA	2-Hydroxylauroylcarnitine;3-hydroxydodecanoyl carnitine;12-Hydroxydodecanoylcarnitine;7-Hydroxydodecanoylcarnitine;10-Hydroxydodecanoylcarnitine;6-Hydroxydodecanoylcarnitine;11-Hydroxydodecanoylcarnitine;5-Hydroxydodecanoylcarnitine;8-Hydroxydodecanoylcarnitine;4-Hydroxydodecanoylcarnitine;9-Hydroxydodecanoylcarnitine;13-Hydroxy-9-methoxy-10-oxo-11-octadecenoic acid;2,3-Dinor-TXB1	1.92921e+06	1.28022e+06	990673	900772	944030	2.71258e+06	1.81675e+06	1.05034e+06	2.66638e+06	967300	610847	3.85127e+06	410368	189316	5.10882e+06	3.89002e+06	3.86629e+06	2.4658e+06	3.21858e+06	3.42439e+06	2.54363e+06	2.38503e+06	1.72819e+06	4.28785e+06	3.15686e+06	2.09318e+06	3.26265e+06	4.16895e+06	2.3543e+06	1.45143e+06	3.25716e+06	0.4456	down	0.000338373	0.00767363	2.21741	yes
NEG	NEG_269.212_8.9304	269.212	8.9304	11-Oxohexadecanoic acid	80.9	C16H30O3	Lipids and lipid-like molecules	Fatty Acyls	HMDB0030978	NA	NA	3-Oxohexadecanoic acid;8-Oxohexadecanoic acid;9-Oxohexadecanoic acid;11-Oxohexadecanoic acid;2-Hydroxydodecyl methacrylate;5,10-Pentadecadien-1-ol;(+/-)-Dihydrofarnesol;3-Pentadecenal;(2R,5S,8R)-2,8-Dimethyl-5-propan-2-ylcyclodecan-1-one;Tetradec-2-enal;(Z)-8-Tetradecenal;9-Tetradecenal	2.15391e+06	1.79734e+06	3.23556e+06	2.53018e+06	2.48376e+06	4.80772e+06	2.16277e+06	2.9786e+06	3.34532e+06	2.84959e+06	2.30757e+06	4.63723e+06	1.81509e+06	1.85962e+06	4.86482e+06	4.14847e+06	2.16561e+06	4.5953e+06	4.92142e+06	4.82737e+06	2.81148e+06	3.62793e+06	4.09998e+06	4.71059e+06	4.02954e+06	4.25027e+06	5.73793e+06	3.90902e+06	3.488e+06	2.78316e+06	4.19284e+06	0.6638	down	0.000483	0.00969788	1.40337	yes
POS	POS_400.34_7.3314	400.34	7.3314	14-Methylpentadecanoylcarnitine	87.17	C23H45NO4	Lipids and lipid-like molecules	Fatty Acyls	NA	NA	NA	L-Palmitoylcarnitine;O-Palmitoylcarnitine;12-Methylpentadecanoylcarnitine;9-Methylpentadecanoylcarnitine;5-Methylpentadecanoylcarnitine;6-Methylpentadecanoylcarnitine;11-Methylpentadecanoylcarnitine;3-Methylpentadecanoylcarnitine;8-Methylpentadecanoylcarnitine;7-Methylpentadecanoylcarnitine;13-Methylpentadecanoylcarnitine;4-Methylpentadecanoylcarnitine;14-Methylpentadecanoylcarnitine;10-Methylpen…	4.47236e+07	3.23394e+07	3.01356e+07	2.85942e+07	3.4923e+07	3.72957e+07	5.02581e+07	3.73339e+07	4.39471e+07	3.80061e+07	2.08563e+07	6.41634e+07	2.02492e+07	1.55724e+07	4.90051e+07	7.08833e+07	5.48278e+07	5.25409e+07	6.99514e+07	5.68828e+07	4.42905e+07	4.22361e+07	3.89576e+07	5.07511e+07	5.39752e+07	3.897e+07	4.42806e+07	5.69277e+07	4.36742e+07	3.55999e+07	5.17486e+07	0.6879	down	0.00149687	0.0212306	1.35166	yes
NEG	NEG_253.217_8.6586	253.217	8.6586	15-Hexadecanolide	96.31	C16H30O2	Phenylpropanoids and polyketides	Macrolides and analogues	HMDB0031711	NA	NA	Hypogeic acid;Trans-Hexa-dec-2-enoic acid;Palmitelaidic acid;(E)-6-Hexadecenoic acid;5-Dodecyldihydro-2(3H)-furanone;15-Hexadecanolide;(Z)-5-Hexadecenoic acid;(E)-3-Hexadecenoic acid;(Z)-13-Hexadecenoic acid;(E)-11-Hexadecenoic acid;Citronellyl hexanoate;(Z)-14-Methyl-6-pentadecenoic acid;15-Hexadecenoic acid;9-Hexadecenoic acid, (9Z)-;Dodecyl methacrylate;Sapienic acid;Cadinene;Guaiane	4.11611e+07	5.64163e+06	5.38246e+07	6.02804e+06	3.0103e+07	2.43077e+07	1.9375e+07	9.08708e+06	8.85376e+07	7.32092e+06	5.15242e+06	1.90378e+07	1.41227e+07	2.08227e+07	1.58578e+08	9.11193e+07	1.4612e+08	8.10285e+07	1.02608e+08	1.04653e+08	1.43149e+07	7.99782e+07	1.55152e+07	1.22015e+08	1.31468e+08	1.72976e+07	2.02031e+08	9.96722e+07	6.11043e+07	2.46087e+07	9.75999e+07	0.2521	down	0.000157356	0.00445687	2.61113	yes
NEG	NEG_563.503_9.0571	563.503	9.0571	16-OAHSA	70.04	C36H68O4	NA	NA	NA	NA	NA	FAHFA(18:1(9Z)/12-O-18:0);FAHFA(18:1(9Z)/9-O-18:0);FAHFA(18:1(9Z)/5-O-18:0);FAHFA(18:1(9Z)/7-O-18:0);FAHFA(18:1(9Z)/8-O-18:0);FAHFA(18:1(9Z)/10-O-18:0);FAHFA(18:1(9Z)/11-O-18:0);FAHFA(18:1(9Z)/13-O-18:0);FAHFA(18:1(9Z)/6-O-18:0);Oleic acid;Elaidic acid;Petroselinic acid;Vaccenic acid;(Z)-13-Octadecenoic acid;Ethyl 9-hexadecenoate;7Z-octadecenoic acid;Octadec-9-enoic Acid;cis-Vaccenic acid;11-Aoct…	1.10269e+08	6.31012e+07	1.92298e+08	1.19641e+08	1.11508e+08	4.92979e+08	7.40215e+07	1.55498e+08	2.69053e+08	6.8963e+07	5.44752e+07	4.57999e+08	2.8213e+07	3.11273e+07	4.48961e+08	3.32386e+08	3.62111e+08	2.91519e+08	3.91758e+08	3.06909e+08	2.64719e+08	1.98118e+08	2.50566e+08	5.63134e+08	4.53293e+08	3.0953e+08	6.96392e+08	2.53104e+08	2.62559e+08	1.59225e+08	3.65893e+08	0.4352	down	0.000325086	0.00751207	2.37683	yes
NEG	NEG_271.227_7.4431	271.227	7.4431	16-hydroxypalmitic acid	70.34	NA	NA	NA	NA	NA	NA	NA	1.39022e+07	9.34185e+06	1.01623e+07	1.06822e+07	1.42692e+07	1.25782e+07	9.77144e+06	9.13854e+06	1.40611e+07	1.08005e+07	1.16879e+07	1.53477e+07	1.20725e+07	8.52763e+06	1.6237e+07	1.30899e+07	1.49091e+07	1.25446e+07	1.56338e+07	1.26736e+07	1.38755e+07	1.58942e+07	1.33662e+07	1.60955e+07	2.12927e+07	1.3344e+07	1.59477e+07	1.43464e+07	1.32712e+07	1.1596e+07	1.49464e+07	0.7758	down	0.000332763	0.00761362	1.07685	yes
NEG	NEG_303.2_6.633	303.2	6.633	16a-Hydroxydehydroisoandrosterone	80.72	C19H28O3	Lipids and lipid-like molecules	Steroids and steroid derivatives	HMDB0000352	C05139	map00140(Steroid hormone biosynthesis)	NA	271240	777371	289208	483969	1.61526e+06	387693	474771	502929	1.20287e+06	325649	341515	388974	417776	553890	212377	658327	476763	181198	230456	470750	538087	327432	387096	390280	306779	382898	160318	293468	466048	573794	358302	1.6014	up	0.0335583	0.18417	1.07334	yes
NEG	NEG_443.276_6.321	443.276	6.321	17-hydroxyprogesterone caproate	79.17	C27H40O5	Lipids and lipid-like molecules	Steroids and steroid derivatives	NA	NA	NA	1,25-Dihydroxyvitamin D3-26,23-lactone;17-hydroxyprogesterone caproate;Calcitriol lactone;Proliferin;Ganodosterone;(all-E)-1,7,9-Heptadecatriene-11,13,15-triyne;Benzotest;Persicaxanthin;Persicachrome;Estradiol enanthate	81149.9	49690.7	45902.5	150784	40307.6	108753	37778.2	39741.3	142292	82996.1	5706.56	32377.6	663175	491768	62812.2	71284.4	127723	697235	401287	351175	206451	416020	117242	1.29276e+06	32383.7	57840.7	324440	119588	223238	140887	305589	0.461	down	0.0394096	0.201467	1.70977	yes
NEG	NEG_327.29_8.0443	327.29	8.0443	2(R)-hydroxyicosanoic acid	70.22	C20H40O3	Lipids and lipid-like molecules	Fatty Acyls	HMDB0061659	NA	NA	Polyoxyethylene 40 monostearate;2(R)-hydroxyicosanoic acid;12-hydroxyicosanoic acid;15-hydroxyicosanoic acid;2-hydroxyphytanic acid;3-hydroxyicosanoic Acid;Pristanal;2-Nonadecanone;Stearaldehyde;Oleyl alcohol;(2R,3S)-2-Octyl-3-pentyloxane;9-Octadecen-1-ol, (9Z)-;6,10,14-Trimethylpentadecan-2-one	458951	1.82632e+06	1.49482e+06	3.04277e+06	113600	310965	2.83271e+06	2.55861e+06	2.69043e+06	2.51476e+06	1.2913e+06	5.27204e+06	394255	508512	3.15766e+06	5.17728e+06	2.18334e+06	919571	4.25484e+06	1.4385e+06	1.49688e+06	3.53633e+06	7.56892e+06	1.57864e+06	1.45919e+06	1.96005e+06	3.4384e+06	5.86709e+06	2.47667e+06	1.80786e+06	3.14548e+06	0.5747	down	0.0279671	0.163648	1.5766	yes
NEG	NEG_213.113_3.9259	213.113	3.9259	2,3-Diamino-benzidine	75.71	C12H14N4	Benzenoids	Benzene and substituted derivatives	NA	NA	NA	5-Hexyltetrahydro-2-oxo-3-furancarboxylic acid;alpha-Carboxy-delta-decalactone;2-Carboxy-5,7-dimethyl-4-octanolide;4,4'-Dihydrazino-biphenyl;2,3-Diamino-benzidine;3,3'-Diaminobenzidine;trans-4,5-epoxy-2(E)-decenal;Ethyl (4Z)-4,7-octadienoate;Methyl octynecarboxylate;(+/-)-Dihydromintlactone;2,4-Hexadienyl butyrate;2,4-Hexadienyl isobutyrate;cis-3-Hexenyl crotonate;(+/-)-2-(5-Methyl-5-vinyltetrahy…	521245	199624	206896	160641	171149	239965	325502	229168	118898	255324	209965	237853	221132	208939	304843	378224	328069	381466	227567	428772	399239	449254	528182	356474	562853	473949	414832	272499	314733	236164	393302	0.6005	down	6.88618e-05	0.00240847	1.69311	yes
POS	POS_113.034_1.4438	113.034	1.4438	2,4-Dimethylthiophene	72.48	C6H8S	Organoheterocyclic compounds	Heteroaromatic compounds	HMDB0032978	NA	NA	Uracil;4-Carboxypyrazole;Pyridazine-3,6-diol	304243	731493	516210	288814	1.62326e+06	712658	1.49379e+06	428312	1.45335e+06	1.54644e+06	519030	1.99061e+06	469981	1.24722e+06	1.02157e+06	2.41533e+06	1.96374e+06	1.38627e+06	1.56095e+06	1.56543e+06	1.69479e+06	1.68056e+06	1.92532e+06	1.84634e+06	1.55882e+06	1.39853e+06	1.62491e+06	1.70399e+06	1.30971e+06	951815	1.66761e+06	0.5708	down	0.00119055	0.0180714	1.78222	yes
POS	POS_464.282_5.0453	464.282	5.0453	2-((4R)-4-((3R,5R,6R,8S,9S,10R,13R,17R)-3,6-dihydroxy-10,13-dimethylhexadecahydro-1H-cyclopenta[a]phenanthren-17-yl)pentanamido)ethane-1-sulfonic acid	70.04	C26H45NO6S	Lipids and lipid-like molecules	Steroids and steroid derivatives	NA	NA	NA	Bucromarone;Fluocortin butyl	1.52595e+06	931393	1.30125e+06	6.06411e+06	179313	2.75561e+06	1.40477e+06	1.22527e+06	670588	1.7664e+06	1.03925e+06	941991	5.75551e+06	783578	448802	679534	362862	446653	369917	257777	654250	471955	124565	311766	271288	286877	1.43012e+06	473049	1.17623e+06	1.88178e+06	470673	3.9981	up	0.000332453	0.00761362	2.34553	yes
POS	POS_498.286_4.7186	498.286	4.7186	2-((4R)-4-((3R,5S,7R,9S,10S,12S,13R,14S,17R)-3,7,12-trihydroxy-10,13-dimethylhexadecahydro-1H-cyclopenta[a]phenanthren-17-yl)pentanamido)ethane-1-sulfonic acid	71.07	C26H45NO7S	Lipids and lipid-like molecules	Steroids and steroid derivatives	NA	NA	NA	LysoPS(16:0/0:0);Hydrocortamate;Netilmicin;Citronellyl beta-sophoroside;Demethylzeylasteral	42998.3	303579	65411.2	252764	286620	160326	95082.6	61312.1	29533.6	113797	41931.7	48402.7	514629	73496.8	107753	107601	2305.68	30412.4	5003.22	54209.4	74524.1	44599.2	49882.7	88942.8	64224.2	62133.3	115670	49879	105251	149277	61224.3	2.4382	up	0.033743	0.18469	1.57714	yes
POS	POS_76.0756_0.8237	76.0756	0.8237	2-Aminopropanol	95.22	C3H9NO	NA	NA	NA	NA	NA	Trimethylamine N-oxide;1-Amino-propan-2-ol;2-Methoxyethylamine;Aminopropanol;Acetone;Propanal;Methyloxirane;Allyl alcohol;(E)-1-Propenol;Methyl vinyl ether	9.29449e+06	4.00575e+06	3.70501e+06	6.12333e+06	6.40712e+06	1.85321e+06	2.33176e+06	1.98833e+07	4.10243e+06	2.8072e+06	3.04951e+06	1.56405e+07	1.07437e+06	910900	3.88617e+06	1.47071e+07	1.68511e+06	1.29728e+07	6.60344e+06	1.65812e+07	1.20595e+07	4.4994e+06	2.78058e+07	1.2983e+07	7.94858e+06	2.7488e+06	1.38496e+07	3.75625e+06	7.97413e+06	5.79921e+06	1.01491e+07	0.5714	down	0.0474585	0.224819	1.35103	yes
NEG	NEG_99.0086_0.7501	99.0086	0.7501	2-Aminothiazole	70.8	C3H4N2S	Organoheterocyclic compounds	Azoles	NA	NA	NA	Succinic anhydride;2-Propyn-1-al;Propynyloxy	3.21365e+06	2.04962e+06	2.19686e+06	2.21915e+06	3.0144e+06	2.12022e+06	2.23287e+06	1.89901e+06	2.72778e+06	2.09706e+06	2.0019e+06	1.97352e+06	2.11501e+06	1.77532e+06	1.57456e+06	1.0697e+06	1.44872e+06	1.71964e+06	1.05633e+06	1.04939e+06	1.98364e+06	1.34229e+06	1.04017e+06	1.35911e+06	1.59488e+06	1.08273e+06	1.27715e+06	1.26786e+06	1.80366e+06	2.25974e+06	1.34758e+06	1.6769	up	1.26304e-07	1.82756e-05	1.75462	yes
NEG	NEG_197.02_4.7848	197.02	4.7848	2-Chloro-DG	79.31	C6H11ClO5	Organic oxygen compounds	Organooxygen compounds	NA	NA	NA	4,6-Dinitro-O-cresol;2,4-Dinitroanisole;Allyl isothiocyanate;3-Thiocyanato-1-propene;4-Methylthiazole;5-Methylthiazole;Thiiraneacetonitrile;Isothiocyanatocyclopropane;2-Methylthiazole;Thiazine	1.78134e+06	2.33122e+06	2.20526e+06	1.22249e+06	2.0905e+06	1.01569e+06	3.00059e+06	1.11612e+06	2.82836e+06	1.79055e+06	1.49698e+06	1.53388e+06	1.78689e+06	1.65028e+06	1.51539e+06	459813	834268	1.95995e+06	1.20221e+06	1.38328e+06	1.04488e+06	1.13235e+06	1.00068e+06	1.3727e+06	835140	1.23845e+06	914943	780464	1.48302e+06	1.84644e+06	1.11961e+06	1.6492	up	0.00052705	0.0103246	1.48831	yes
NEG	NEG_162.019_3.4537	162.019	3.4537	2-Chloroquinoline	70.54	C9H6ClN	Organoheterocyclic compounds	Quinolines and derivatives	NA	NA	NA	NA	31895.5	98557.4	127814	37638.9	36068.1	25377.1	101408	255838	111305	106824	94374	94134.1	82450.6	44901	108462	77358.2	89067.9	120244	248420	76100.7	306050	68514.6	132514	158156	151217	94145.3	216953	132391	115292	89184.7	141400	0.6307	down	0.0167171	0.116818	1.35147	yes
NEG	NEG_117.056_2.8797	117.056	2.8797	2-Ethylhydracrylic acid	71.8	C5H10O3	Lipids and lipid-like molecules	Fatty Acyls	HMDB0000396	NA	NA	NA	897986	396500	1.40407e+06	636756	725633	500978	1.49369e+06	2.26106e+06	1.24427e+06	1.10091e+06	928326	1.90127e+06	1.24606e+06	1.72067e+06	2.31518e+06	1.81066e+06	1.01259e+06	1.62006e+06	2.33964e+06	1.50437e+06	2.14369e+06	1.35013e+06	1.31475e+06	2.72605e+06	548991	1.33958e+06	2.22288e+06	1.82346e+06	1.44751e+06	1.17559e+06	1.71943e+06	0.6837	down	0.0240433	0.14894	1.12681	yes
NEG	NEG_224.061_3.9836	224.061	3.9836	2-Hydroxy-3-morpholinopropanesulfonic Acid	70.21	C7H15NO5S	Organoheterocyclic compounds	Oxazinanes	NA	NA	NA	2-Hydroxy-3-morpholinopropanesulfonic Acid;N-Nitrosoanatabine;(R)C(R)S-S-Propylcysteine sulfoxide;Cyclamic acid;Fudosteine;S-Propylcysteine sulphoxide;Ethiin;2-Hydroxy-L-methionine;D-Methionine (S)-S-oxide	5.29149e+07	2.97325e+07	1.28804e+07	3.60558e+07	3.48175e+07	1.5353e+07	3.37273e+07	2.46155e+07	4.35125e+07	8.93132e+06	1.53521e+07	4.567e+07	1.24642e+07	2.17443e+07	9.49193e+06	1.93073e+07	1.66122e+07	2.53637e+07	1.1378e+07	1.9364e+07	1.10004e+07	8.15388e+06	1.49885e+07	1.23283e+07	1.22798e+07	1.23779e+07	9.76268e+06	2.00957e+07	2.10813e+07	2.7698e+07	1.44646e+07	1.9149	up	0.00364898	0.0396532	1.51554	yes
POS	POS_302.195_4.1445	302.195	4.1445	2-Hydroxy-5-octenoylcarnitine	78.96	C15H27NO5	Lipids and lipid-like molecules	Fatty Acyls	NA	NA	NA	3-Hydroxy-cis-5-octenoylcarnitine;2-Hydroxy-5-octenoylcarnitine;4-Hydroxy-6-octenoylcarnitine;3-Hydroxy-6-octenoylcarnitine;2-Hydroxy-4-octenoylcarnitine;5-Oxooctanoylcarnitine;7-Oxooctanoylcarnitine;6-Oxooctanoylcarnitine;4-Oxooctanoylcarnitine;3-Oxooctanoylcarnitine;1-[(5-Methoxy-3-indolylidene)methylamino]-2-pentylguanidine;1-[[(Z)-[5-(Hydroxymethyl)indol-3-ylidene]methyl]amino]-2-pentylguanid…	261424	195703	146090	74213.9	195085	434276	288513	102196	398195	251996	150718	451600	49331.9	44520.6	598602	476918	373428	410032	212079	698445	268736	389366	253376	617414	437919	270002	353978	634545	322811	217419	428203	0.5077	down	0.00145485	0.0208695	1.88156	yes
NEG	NEG_101.024_0.7503	101.024	0.7503	2-Ketobutyric acid	86.21	C4H6O3	Organic acids and derivatives	Keto acids and derivatives	HMDB0000005	C00109	map00260(Glycine, serine and threonine metabolism);map00270(Cysteine and methionine metabolism);map00290(Valine, leucine and isoleucine biosynthesis);map00640(Propanoate metabolism);map00660(C5-Branched dibasic acid metabolism);map01100(Metabolic pathways);map01110(Biosynthesis of secondary metabolites);map01210(2-Oxocarboxylic acid metabolism);map01230(Biosynthesis of amino acids)	2-Ketobutyric acid;Acetoacetic acid;2-Methyl-3-oxopropanoic acid;(S)-Methylmalonic acid semialdehyde;4-Hydroxycrotonic acid;Acetic anhydride;2-Oxoethyl acetate;Methyl pyruvate;Propylene carbonate;Acrolein;Methylketene;Ketene;Ethynol;Oxirene	3.4215e+07	2.71232e+07	2.70634e+07	2.66083e+07	2.93237e+07	2.89873e+07	3.3184e+07	2.56754e+07	2.65808e+07	2.93182e+07	2.9103e+07	2.54154e+07	2.79454e+07	2.6522e+07	2.02169e+07	1.92977e+07	1.89119e+07	2.46194e+07	2.08816e+07	1.98697e+07	2.3968e+07	2.33462e+07	1.95915e+07	2.45218e+07	2.19178e+07	1.79611e+07	2.14633e+07	2.12896e+07	2.48186e+07	2.83618e+07	2.12755e+07	1.3331	up	1.75711e-08	3.85406e-06	1.31912	yes
NEG	NEG_331.255_8.4037	331.255	8.4037	2-Methyl-5-(8-pentadecenyl)-1,3-benzenediol	97	C22H36O2	Benzenoids	Phenols	HMDB0038910	NA	NA	NA	1.37261e+06	387753	3.59265e+06	464795	619506	3.03407e+06	750299	1.07854e+06	2.02934e+06	324151	331541	6.71725e+06	394530	269991	2.73462e+06	1.28183e+06	1.66938e+06	1.46684e+06	2.70024e+06	1.88154e+06	1.11621e+06	1.45707e+06	1.39924e+06	4.38037e+06	2.97803e+06	1.43082e+06	5.56499e+06	1.41251e+06	1.88717e+06	1.52622e+06	2.24812e+06	0.6789	down	0.0174225	0.120187	1.80641	yes
NEG	NEG_247.17_7.1863	247.17	7.1863	2-Phenylethyl octanoate	71.36	C16H24O2	Lipids and lipid-like molecules	Fatty Acyls	HMDB0037719	NA	NA	Dimethylbenzyl carbinyl hexanoate;[2-(Dimethoxymethyl)-1-heptenyl]benzene;Furanofukinin;Octyl phenylacetate;2-Phenylethyl octanoate;(4E,7E,10E,13E)-Hexadeca-4,7,10,13-tetraenoic acid;2,3-Dimethyl-2-cyclohexen-1-one;6-Methyl-3,5-heptadien-2-one;(E,E)-2,4-Octadienal;trans, trans-3,5-Octadien-2-one;1,5-Octadien-3-one;2-Isopropyl-5-methylfuran;(E,E)-2,6-Octadienal;3,5,5-Trimethyl-2-cyclopenten-1-one;…	4.37814e+06	2.28093e+06	5.49217e+06	2.62473e+06	3.16262e+06	9.21812e+06	2.23812e+06	3.83631e+06	7.55539e+06	2.70614e+06	2.40132e+06	2.59593e+07	1.87072e+06	1.89148e+06	1.28284e+07	9.25628e+06	1.04916e+07	7.52722e+06	7.40427e+06	1.20618e+07	7.85495e+06	8.60052e+06	7.39738e+06	1.29836e+07	1.3966e+07	9.42184e+06	1.21281e+07	6.29324e+06	7.63681e+06	5.4011e+06	9.87252e+06	0.5471	down	0.000502193	0.0100228	2.07754	yes
POS	POS_353.229_5.1315	353.229	5.1315	20-hydroxy-PGF2a	72.22	C20H34O6	Lipids and lipid-like molecules	Fatty Acyls	HMDB0004049	NA	NA	NA	207065	206382	173286	512040	165094	147437	523219	397511	158774	233588	243698	123382	99066.9	317744	516515	173323	125705	672735	549696	454833	573193	386152	65728.5	1.76218e+06	658109	823700	587330	305249	398669	250592	546746	0.4583	down	0.0243129	0.150187	1.40006	yes
NEG	NEG_299.259_8.2625	299.259	8.2625	2R-hydroxy-stearic acid	78.69	C18H36O3	Lipids and lipid-like molecules	Fatty Acyls	NA	C03042	NA	NA	7.39034e+06	4.71736e+06	6.41294e+06	6.29412e+06	5.37701e+06	8.39204e+06	6.27997e+06	7.57642e+06	8.61501e+06	5.07889e+06	1.07132e+07	2.87658e+07	4.69669e+06	5.43067e+06	1.1036e+07	1.17908e+07	8.33941e+06	1.00355e+07	1.20157e+07	9.11343e+06	1.06828e+07	1.17132e+07	1.00047e+07	1.18822e+07	1.10733e+07	1.01182e+07	8.55901e+06	1.04281e+07	9.37617e+06	8.26717e+06	1.04852e+07	0.7885	down	0.0123394	0.0948097	1.1791	yes
POS	POS_368.278_5.782	368.278	5.782	3, 5-Tetradecadiencarnitine	83.63	C21H37NO4	Lipids and lipid-like molecules	Fatty Acyls	HMDB0013331	NA	NA	3, 5-Tetradecadiencarnitine;(5Z,8Z)-Tetradecadienoylcarnitine;(10Z,12E)-Tetradecadienoylcarnitine;(6Z,9Z)-Tetradecadienoylcarnitine;(2E,4E)-Tetradecadienoylcarnitine;N-Linoleoyl Serine;Tetradecadienoylcarnitine;5a-Tetrahydrocorticosterone;Tetrahydrodeoxycortisol;MG(0:0/18:4(6Z,9Z,12Z,15Z)/0:0);MG(18:4(6Z,9Z,12Z,15Z)/0:0/0:0);(S)-[10]-Gingerol;Pregnanetriolone;15-Hydroxy-11alpha,9alpha-(epoxymetha…	6.35926e+06	1.18105e+07	9.05766e+06	7.51151e+06	9.97569e+06	2.28526e+07	1.5368e+07	1.03785e+07	3.86598e+07	1.15443e+07	7.08829e+06	4.14193e+07	5.18024e+06	2.26521e+06	5.73784e+07	1.94644e+07	6.5767e+07	2.17494e+07	3.782e+07	3.43807e+07	1.80498e+07	1.91184e+07	1.52069e+07	5.88443e+07	3.88844e+07	2.36893e+07	3.73262e+07	3.5946e+07	2.43963e+07	1.42479e+07	3.45447e+07	0.4124	down	0.000251411	0.00624613	2.27993	yes
NEG	NEG_349.275_9.2445	349.275	9.2445	3,4-Dimethyl-5-pentyl-2-furanundecanoic acid	83.26	C22H38O3	Lipids and lipid-like molecules	Fatty Acyls	HMDB0031126	NA	NA	3,4-Dimethyl-5-pentyl-2-furanundecanoic acid;3,4-Dimethyl-5-propyl-2-furantridecanoic acid;3-Pentadecylphenol;(3S,6E,10E)-1,6,10,14-Phytatetraen-3-ol;8alpha-13(16),14-Labdadien-8-ol;(ent-16alpha)-16-Kauranol;18-Deoxysagittarol;Serratol;(E,E,E)-Geranylgeranyl alcohol;ent-Kauran-16-beta-ol;Manoyl oxide;Manool	164826	179694	929717	683382	292544	846205	245460	1.30861e+06	580480	373024	493924	8.08998e+06	46104.6	136178	1.53211e+06	770287	1.25499e+06	489814	1.6848e+06	1.17257e+06	1.09446e+06	1.37899e+06	1.34969e+06	2.45003e+06	1.56632e+06	1.55289e+06	1.5709e+06	1.12221e+06	1.19144e+06	1.02644e+06	1.35643e+06	0.7567	down	0.00652803	0.0600146	2.1511	yes
POS	POS_135.003_0.826	135.003	0.826	3,4-dihydroxycinnamic acid	84.66	C9H8O4	Phenylpropanoids and polyketides	Cinnamic acids and derivatives	HMDB0001964	C01481	NA	Sodium lactate	1.96502e+08	8.39106e+07	9.75328e+07	1.32863e+08	6.43532e+07	1.32891e+08	1.68675e+08	1.56356e+08	1.22995e+08	6.9794e+07	1.23147e+08	1.03737e+08	9.01769e+07	8.25402e+07	2.27715e+08	2.49865e+08	1.95983e+08	2.17444e+08	1.74336e+08	1.90201e+08	2.24848e+08	1.92452e+08	2.43748e+08	2.17025e+08	2.17937e+08	2.39795e+08	1.48145e+08	2.27163e+08	1.64005e+08	1.16105e+08	2.11904e+08	0.5479	down	3.48255e-06	0.000277603	1.91054	yes
POS	POS_537.12_4.1589	537.12	4.1589	3,5,6-Trihydroxy-3',4',7-trimethoxyflavone 3-glucuronide	78.07	C24H24O14	Phenylpropanoids and polyketides	Flavonoids	HMDB0038264	NA	NA	DL-Homocystine;L-Homocystine;Dimethyl cystine;Ethylenedicysteine;Pyran-3,4-dicarboxylic anhydride, tetrahydro-2-methyl-6-(tetrahydro-2,5-dioxo-3-furyl)-, polymer;Penicillamine cysteine disulfide;Jaceidin 4'-glucuronide;3,5,6-Trihydroxy-3',4',7-trimethoxyflavone 3-glucuronide;Dukunolide B	340540	32457.3	26046.6	37222.1	125399	27463.4	30128.1	92284	31558	47399.6	20780.7	21834.3	15541.3	36028.1	24893.7	14494.9	29575.6	36580.3	17691.8	12649.4	29922.9	21258.8	22795.1	33343.3	21032.5	20153.9	14879.4	35158.6	43539.7	63191.6	23887.9	2.6453	up	0.0228751	0.143483	1.35568	yes
NEG	NEG_215.002_4.1746	215.002	4.1746	3- Acetylphenol sulfate	84.23	C8H8O5S	Organic oxygen compounds	Organooxygen compounds	NA	NA	NA	3- Acetylphenol sulfate;2-Mercapto-3-furan-2-ylpropenoic acid	1.36281e+06	2.17157e+06	87295.8	623099	262194	256782	63145.4	81190.2	117578	4.8699e+06	4.38052e+06	134423	57252.4	321178	31384	109522	46850.4	37722.6	29184.2	20208.3	23225.4	21173.7	56121	35101.6	933649	49764.3	553005	214028	605353	1.05635e+06	154353	6.8438	up	0.00374797	0.0403991	2.50983	yes
POS	POS_466.195_4.767	466.195	4.767	3-(9,10-dimethoxy-5,11-dioxoisoindolo[2,1-a]quinazolin-6(5H,6aH,11H)-yl)-N-((tetrahydrofuran-2-yl)methyl)propanamide	97	C25H27N3O6	Organic acids and derivatives	Carboxylic acids and derivatives	NA	NA	NA	Biotripyrrin-a;Biotripyrrin-b;Cisapride;Acalabrutinib;Dihydroxyacidissiminol;Dixyrazine;Armillaridin;8-O-Acetyl shanzhiside methyl ester;Pranidipine;3-O-Methyl 5-O-(3-phenylprop-2-enyl) 2,6-dimethyl-4-(3-nitrophenyl)-3,4-dihydropyridine-3,5-dicarboxylate	177336	259806	147096	247029	141521	161377	304306	283116	210616	123459	70898.1	349237	452970	190095	521006	489829	674111	435008	552945	190381	275299	158312	216605	418342	336016	419622	855369	328694	321086	222776	419396	0.5312	down	0.00184265	0.0242625	1.58847	yes
POS	POS_442.351_6.6429	442.351	6.6429	3-Hydroxy-11Z-octadecenoylcarnitine	88.08	C25H47NO5	Lipids and lipid-like molecules	Fatty Acyls	HMDB0013339	NA	NA	3-Hydroxy-11Z-octadecenoylcarnitine;3-Hydroxy-9Z-octadecenoylcarnitine;(9Z)-3-Hydroxyoctadecenoylcarnitine;(12E)-9-Hydroxyoctadecenoylcarnitine;(12Z)-10-Hydroxyoctadecenoylcarnitine;(9Z)-12-Hydroxyoctadec-9-enoylcarnitine;3-Oxooctadecanoylcarnitine;hydroxyoctadecenoylcarnitine;isopropyl unoprostone	715481	169827	108074	161946	191292	575786	385840	81759.8	941497	102544	27875.8	547775	73468.7	89595.7	805259	772981	697057	377227	877743	591342	260406	159302	218331	894819	703153	551457	1.0655e+06	603232	455378	298054	612701	0.4865	down	0.00330785	0.0369104	2.03656	yes
NEG	NEG_187.134_5.3361	187.134	5.3361	3-Hydroxycapric acid	93.4	C10H20O3	Organic acids and derivatives	Hydroxy acids and derivatives	HMDB0002203	NA	NA	3-Hydroxycapric acid;(R)-3-Hydroxydecanoic acid;9-Hydroxydecanoic acid;(1R,2R,4R,8R)-p-Menthane-2,8,9-triol;7-Methyl-3-methylene-1,6,7-octanetriol;cis-p-Menthane-1,7,8-triol;2,6-Dimethyl-7-octene-2,3,6-triol;(1S,2S,4R,8R)-p-Menthane-1,2,9-triol;2-Hexyl-1,3-dioxan-5-ol;2-Hexyl-1,3-dioxolane-4-methanol;(1R,2R,4S)-p-Menthane-1,2,8-triol;xi-5-Hydroxydecanoic acid;Ethyl (&#177;)-3-hydroxyoctanoate;2-H…	1.65275e+06	1.19934e+06	1.24621e+06	2.27603e+06	1.12961e+06	4.91139e+06	1.29963e+06	1.53164e+06	2.57809e+06	1.15566e+06	1.08552e+06	5.22139e+06	541103	555398	6.00251e+06	2.62012e+06	4.78394e+06	2.12121e+06	3.00969e+06	2.16651e+06	1.94905e+06	2.14384e+06	2.04377e+06	7.60046e+06	2.94307e+06	2.20167e+06	3.90957e+06	2.48983e+06	2.58461e+06	1.88455e+06	3.28466e+06	0.5737	down	0.0042227	0.0441229	1.70447	yes
POS	POS_412.304_5.7495	412.304	5.7495	3-Hydroxyhexadecadienoylcarnitine	88.21	C23H41NO5	Lipids and lipid-like molecules	Fatty Acyls	HMDB0013335	NA	NA	3-Hydroxyhexadecadienoylcarnitine;(9Z,12Z)-3-Hydroxyhexadecadienoylcarnitine;(6,12)-11-Hydroxyhexadecadienoylcarnitine;N-Oleoyl Glutamic acid;11-Hydroxyeicosatetraenoate glyceryl ester;2-(14,15-Epoxyeicosatrienoyl) Glycerol;gemeprost;Norcholic acid;MG(20:3(5Z,8Z,11Z)-O(14R,15S)/0:0/0:0);MG(20:3(5Z,8Z,14Z)-O(11S,12R)/0:0/0:0);MG(20:3(5Z,11Z,14Z)-O(8,9)/0:0/0:0);MG(20:3(8Z,11Z,14Z)-O(5,6)/0:0/0:0);…	1.26275e+06	1.60577e+06	785410	1.18254e+06	1.31404e+06	3.10359e+06	2.57598e+06	1.40476e+06	2.60231e+06	1.36574e+06	1.01742e+06	3.28e+06	908902	417623	3.52344e+06	2.66737e+06	3.55347e+06	3.34331e+06	2.24184e+06	3.34683e+06	1.75804e+06	1.63234e+06	1.45756e+06	4.16578e+06	2.56723e+06	2.18395e+06	2.27582e+06	2.80274e+06	2.15523e+06	1.63049e+06	2.67998e+06	0.6084	down	0.00278611	0.032706	1.59873	yes
NEG	NEG_201.149_5.6332	201.149	5.6332	3-Hydroxynonyl acetate	76.33	C11H22O3	Lipids and lipid-like molecules	Fatty Acyls	HMDB0032443	NA	NA	3-Hydroxynonyl acetate;2-Hydroxyundecanoate;3-hydroxyundecanoic acid;2-Hydroxypropyl octanoate;Menthol;Decanal;(E)-3-decen-1-ol;2-Decanone;cis-4-Decenol;3-Decanone;3,7-Dimethyloctanal;(+/-)-4-Ethyloctanal;2-DECENOL;Menthanol;p-Menthan-4-ol;(+)-Neomenthol;(-)-Neoisomenthol;p-Menthan-3-ol;p-Menthan-1-ol;alpha-Citronellol;(&#177;)-Carvomenthol;Dihydrocitronellal;1-Decen-3-ol;(+)-Neoisomenthol;9-Dece…	78659	81440.5	552285	169372	863598	625716	1.39477e+06	1.39105e+06	1.85528e+06	709303	1.31382e+06	2.38884e+06	797051	282106	1.71276e+06	1.94629e+06	1.7905e+06	784276	1.59007e+06	1.55536e+06	1.38206e+06	1.61763e+06	1.86662e+06	1.3739e+06	806949	1.15532e+06	1.95984e+06	1.36543e+06	1.19322e+06	893092	1.49336e+06	0.598	down	0.0101021	0.0820497	1.85969	yes
POS	POS_382.258_5.0556	382.258	5.0556	3-Hydroxytetradeca-6,8,10-trienoylcarnitine	84.02	C21H35NO5	Lipids and lipid-like molecules	Fatty Acyls	NA	NA	NA	3-Hydroxytetradeca-5,7,9-trienoylcarnitine;3-Hydroxytetradeca-6,9,12-trienoylcarnitine;3-Hydroxytetradeca-7,9,11-trienoylcarnitine;3-Hydroxytetradeca-8,10,12-trienoylcarnitine;3-Hydroxytetradeca-6,8,10-trienoylcarnitine;3-Hydroxytetradeca-5,8,11-trienoylcarnitine;3-Hydroxytetradeca-4,6,8-trienoylcarnitine;(4Z,10Z,12E)-3-Hydroxytetradeca-4,10,12-trienoylcarnitine;3-Hydroxytetradeca-4,7,10-trienoyl…	267378	199461	89324	172695	102002	176817	166871	263976	234650	171345	85653.4	392729	47448.2	61592.6	716324	358350	336664	220059	250583	372291	226010	226011	272335	484523	226377	205141	361187	314789	250092	173710	326475	0.5321	down	0.000947278	0.0153408	1.7647	yes
POS	POS_388.304_5.7857	388.304	5.7857	3-Hydroxytetradecanoyl carnitine	80.83	C21H41NO5	Lipids and lipid-like molecules	Fatty Acyls	HMDB0061640	NA	NA	2-Hydroxymyristoylcarnitine;3-Hydroxytetradecanoyl carnitine;Deoxyspergualin;Tresperimus;Glycerylmonooleate;MG(18:1(12Z)-O(9S,10R)/0:0/0:0);MG(18:1(9Z)-O(12,13)/0:0/0:0);MG(0:0/18:1(12Z)-O(9S,10R)/0:0);MG(0:0/18:1(9Z)-O(12,13)/0:0)	2.8881e+06	1.86012e+06	1.14066e+06	1.78468e+06	1.16249e+06	3.78111e+06	3.45477e+06	1.72324e+06	2.77564e+06	1.60236e+06	1.38967e+06	3.45739e+06	972100	431256	4.46665e+06	4.59573e+06	3.98364e+06	2.96198e+06	3.91029e+06	3.38169e+06	2.69201e+06	2.01795e+06	1.73547e+06	3.26414e+06	2.8503e+06	2.29795e+06	2.9996e+06	4.55608e+06	2.64775e+06	2.03026e+06	3.26525e+06	0.6218	down	0.00437389	0.0449615	1.53108	yes
NEG	NEG_178.051_3.2246	178.051	3.2246	3-Succinoylpyridine	75	C9H9NO3	Organic acids and derivatives	Keto acids and derivatives	HMDB0000992	C19569	map00760(Nicotinate and nicotinamide metabolism);map00980(Metabolism of xenobiotics by cytochrome P450);map01100(Metabolic pathways);map01120(Microbial metabolism in diverse environments);map05204(Chemical carcinogenesis - DNA adducts)	Hippuric acid;3-Succinoylpyridine;Methyl n-formylanthranilate;1-(4-Methoxyphenyl)-2-nitroethylene;2-Propenamide, 3-(3,4-dihydroxyphenyl)-;4-Acetamidobenzoic acid;Adrenolutin;Erbstatin;N-Acetyl-2-hydroxybenzamide;1-Methyl-1H-indole-3,5,6-triol;Indoxyl;4-Hydroxybenzeneacetonitrile;2-Methyl-4,5-benzoxazole;(&#177;)-2-Hydroxy-2-phenylacetonitrile;5-Hydroxyindole;Mandelonitrile;1,3-Dihydro-(2H)-indol-…	6.78252e+06	5.3931e+06	2.09512e+06	2.18016e+06	2.52913e+06	2.20538e+06	2.32818e+06	4.86109e+06	1.5636e+06	9.32104e+06	3.17391e+06	5.13894e+06	1.70571e+06	2.09535e+06	4.39299e+06	3.40111e+07	1.76973e+06	3.09684e+06	9.62171e+06	4.94238e+06	8.11594e+06	5.07795e+06	2.07463e+07	1.35625e+07	5.01832e+06	3.71074e+06	5.06359e+06	2.24466e+07	6.89107e+06	3.66952e+06	1.01126e+07	0.3629	down	0.00560848	0.0542588	1.75713	yes
NEG	NEG_422.176_8.4542	422.176	8.4542	3-[(7S,8R)-5-hydroxy-2,2,7,8-tetramethyl-6-oxo-7,8-dihydropyrano[3,2-g]chromen-10-yl]-3-phenylpropanoic acid	75.99	C25H26O6	Organoheterocyclic compounds	Benzopyrans	NA	NA	NA	trimebutine;(3E,6Z)-3-Benzylidene-6-[[4-[2-(dimethylamino)ethoxy]phenyl]methylidene]piperazine-2,5-dione	7.22546e+06	5.59548e+06	1.06209e+07	8.90218e+06	9.68288e+06	1.50411e+07	6.34639e+06	9.82781e+06	1.13841e+07	8.73675e+06	5.18683e+06	1.16041e+07	4.04375e+06	3.07426e+06	1.40825e+07	1.02186e+07	1.20988e+07	1.28856e+07	1.3462e+07	1.23839e+07	1.11688e+07	1.04687e+07	1.36391e+07	1.66553e+07	1.48779e+07	1.262e+07	1.77275e+07	1.0341e+07	1.07108e+07	8.37657e+06	1.3045e+07	0.6421	down	0.000896275	0.0147985	1.54664	yes
NEG	NEG_243.196_6.7337	243.196	6.7337	3-hydroxy-tetradecanoic acid	88.39	C14H28O3	NA	NA	HMDB0094672	NA	NA	2-Hydroxymyristic acid;(R)-3-Hydroxy-tetradecanoic acid;3-(L-Menthoxy)-2-methylpropane-1,2-diol;Ethyl 3-hydroxydodecanoate;3-Hydroxytetradecanoic acid;Tridecanal;2-Tridecanone;2-Dodecanone;2-Methylundecanal;(+/-)-2,4,8-Trimethyl-7-nonen-2-ol;Lauric aldehyde;(2E)-2-dodecen-1-ol	1.02789e+06	808072	1.80626e+06	1.10956e+06	866270	3.84224e+06	655109	683111	4.73941e+06	899553	529466	5.81666e+06	791263	702421	7.91042e+06	2.82687e+06	3.74483e+06	3.1236e+06	4.22535e+06	3.00757e+06	3.26243e+06	2.62514e+06	3.1081e+06	5.78913e+06	5.49999e+06	3.20067e+06	5.65909e+06	3.62074e+06	2.92433e+06	1.73409e+06	4.11457e+06	0.4215	down	9.25084e-05	0.00300359	2.41286	yes
NEG	NEG_321.243_7.4432	321.243	7.4432	3-hydroxyicosa-8,11,14-trienoic acid	88.23	C20H34O3	Lipids and lipid-like molecules	Fatty Acyls	NA	NA	NA	15(S)-Hydroxyeicosatrienoic acid;Austroinulin;8-HETrE;3,4-Dimethyl-5-pentyl-2-furannonanoic acid;3,4-Dimethyl-5-propyl-2-furanundecanoic acid;12R-hydroxy-5Z,8Z,12Z-eicosatrienoic acid;12(S)-HETrE;5-Heptyl-3,4-dimethyl-2-furanheptanoic acid;5-Hexyl-3-methyl-2-furannonanoic acid;20-Hydroxyeicosatrieneoic acid;12(r)-Hydroxyeicosatrienoic acid;5a-Androstan-3b-ol;(3R)-10,13-Dimethyl-2,3,4,5,6,7,8,9,11…	610217	178275	739450	579546	543221	2.12831e+06	293232	524149	698417	249993	406236	2.25757e+06	143286	55142.4	2.42211e+06	1.04009e+06	1.39253e+06	1.51247e+06	1.3777e+06	1.68737e+06	1.65845e+06	1.181e+06	920086	2.05672e+06	1.71889e+06	1.42152e+06	1.40472e+06	914556	1.07554e+06	671932	1.47916e+06	0.4543	down	0.000675346	0.0121527	2.34666	yes
NEG	NEG_239.165_6.1067	239.165	6.1067	3-hydroxytetradeca-5,7-dienoic acid	82.88	C14H24O3	Lipids and lipid-like molecules	Fatty Acyls	NA	NA	NA	L-Menthyl acetoacetate;Geranylacetone;(+/-)-[R-(E)]-5-Isopropyl-8-methylnona-6,8-dien-2-one;4-(2,6,6-Trimethyl-1-cyclohexen-1-yl)-2-butanone;Octahydro-6-isopropyl-2(1H)-naphthalenone;7,8-Dehydro-3,4-dihydro-beta-ionol;beta-Ionol;Theaspirane;Dihydro-alpha-ionone;5-Isopropyl-2-(2-methylpropyl)-2-cyclohexen-1-one;4,7-Megastigmadien-9-ol;(E)-2-(2-Octenyl)cyclopentanone;(&#172;&#177;)-trans-Nerolidol;…	784970	937818	1.50532e+06	1.99013e+06	1.08666e+06	4.61911e+06	1.37499e+06	1.39045e+06	3.33568e+06	1.56549e+06	798182	7.13993e+06	401641	364876	1.02198e+07	2.71535e+06	5.21249e+06	3.17237e+06	3.61804e+06	3.42803e+06	2.3935e+06	3.0517e+06	3.89569e+06	1.10961e+07	4.8009e+06	2.9164e+06	6.18589e+06	3.2924e+06	3.33192e+06	1.94966e+06	4.71419e+06	0.4136	down	0.00033441	0.00761362	2.32425	yes
NEG	NEG_227.192_7.6174	227.192	7.6174	3-methyltridecanoic acid	96.73	C14H28O2	Lipids and lipid-like molecules	Fatty Acyls	NA	NA	NA	NA	924747	922571	1.01675e+06	670508	1.02159e+06	914762	919261	865945	1.2536e+06	934406	1.01578e+06	2.77076e+06	921184	925846	2.33275e+06	1.02505e+06	1.73805e+06	895250	1.22341e+06	953381	888455	1.06623e+06	3.0855e+06	1.36193e+06	2.10458e+06	812963	4.17582e+06	1.1819e+06	1.35439e+06	1.07698e+06	1.6318e+06	0.66	down	0.0442734	0.21644	1.01522	yes
NEG	NEG_199.17_5.8066	199.17	5.8066	3-methylundecanoic acid	96.78	C12H24O2	Lipids and lipid-like molecules	Fatty Acyls	NA	NA	NA	Dodecanoic acid;Ethyl decanoate;2-Heptyl butyrate;Nonanal propyleneglycol acetal;Hexyl hexanoate;Isopropyl nonanoate;Octyl butanoate;Octyl 2-methylpropanoate;(R)-Dihydrocitronellol acetate;Pentyl heptanoate;Decyl acetate;Isobutyl octanoate;Isohexyl isocaproate;2-(L-Menthoxy)ethanol;2-Nonanone propyleneglycol acetal;heptyl 2-methylbutyrate;butyl octanoate;3-Hexanone;4-Methylpentanal;Methyl isobuty…	196119	288465	165227	87120.7	156045	859548	273451	62825.4	1.48577e+06	243080	93134.2	1.55504e+06	65176.5	943072	1.7627e+06	698002	2.05335e+06	644517	1.42891e+06	802190	490872	601327	353890	1.03471e+06	1.24648e+06	486442	951338	1.46073e+06	731769	462433	1.0011e+06	0.4619	down	0.00149027	0.021195	2.25957	yes
POS	POS_137.045_2.6841	137.045	2.6841	4-Aminobenzoic acid	88.32	C7H7NO2	Benzenoids	Benzene and substituted derivatives	HMDB0001392	C00568	map00627(Aminobenzoate degradation);map00790(Folate biosynthesis);map01061(Biosynthesis of phenylpropanoids);map01100(Metabolic pathways);map01120(Microbial metabolism in diverse environments);map01240(Biosynthesis of cofactors)	Hypoxanthine;Erythronic acid;Threonic acid;Allopurinol;1-Pentanesulfenothioic acid;Ethyl propyl disulfide;Ethyl isopropyl disulfide;2-Hydroxypurine;2,3,4-Trihydroxybutanoic acid;9H-Purine-9-ol	78240.5	17518.6	923909	737471	1.18174e+06	179572	377420	213613	3.57903e+06	71554.5	969934	108100	68167.9	161024	27556.9	147163	117526	138725	75821.9	39242.7	166815	128968	4342.98	140446	303185	72129.1	5001.68	105682	362139	619092	105186	5.8857	up	0.0145363	0.106206	2.17084	yes
NEG	NEG_449.131_3.9786	449.131	3.9786	4-Androsten-3beta,17beta-diol disulfate	73.48	C19H30O8S2	Lipids and lipid-like molecules	Steroids and steroid derivatives	NA	NA	NA	Diltiazem;Dilacor XR;2-Hydroxy-3-morpholinopropanesulfonic Acid;Bentiromide;Oleoside 11-methyl ester;Scandoside methyl ester;1,3-Benzodioxolane-5-carboxylicacid4'-benzyloxy-3'-methoxybenzylidenehydrazide;Gardenoside;Secoxyloganin;Hastatoside;Pallidol 3, 3''-diglucoside;2,3,4,5,6-Penta-O-acetyl-D-glucose;Monotropein;Deacetylasperulosidic acid;Oleoside	2.25868e+06	1.18024e+06	528247	1.46537e+06	1.56095e+06	632916	1.49955e+06	966215	1.70021e+06	343173	648874	1.79375e+06	485041	868123	394438	772001	649323	1.09065e+06	409391	806987	356393	337912	620542	473045	482730	488304	333944	762525	853912	1.13795e+06	569870	1.9969	up	0.00276924	0.0326499	1.58431	yes
NEG	NEG_313.119_5.4662	313.119	5.4662	4-HYDROXY-2',4',6'-TRIMETHOXYCHALCONE	74.89	C18H18O5	Phenylpropanoids and polyketides	Linear 1,3-diarylpropanoids	NA	NA	NA	3-[4-(3-Trifluoromethyl-phenyl)-piperazin-1-yl]-dihydrofuran-2-one;Methyl 6,7-dimethoxy-4-ethyl-beta-carboline-3-carboxylate;Molinate;Cyclopropyl-methoxycarbonyl metomidate;Monoethylhexyl phthalic acid;Diisobutyl phthalate;Dibutyl phthalate;Mono(1-ethylhexyl) phthalate;2,5,7,8-Tetramethyl-2-(2'-carboxyethyl)-6-hydroxychroman;Dibutylphthalic acid;Monooctyl phthalate;4-Ethyl-3-hexylphthalic acid;3-…	767679	913196	464028	534025	802558	671851	998910	1.07338e+06	956093	490161	682773	1.26609e+06	1.01486e+06	720135	1.10757e+06	1.08139e+06	1.81152e+06	1.46674e+06	2.30619e+06	892563	906239	749473	926820	1.70959e+06	1.40901e+06	1.34218e+06	1.40869e+06	1.13815e+06	1.05757e+06	811123	1.30401e+06	0.622	down	0.00044988	0.00930907	1.44589	yes
POS	POS_181.085_5.0481	181.085	5.0481	4-Hydroxy-2,6,6-trimethyl-3-oxo-1,4-cyclohexadiene-1-carboxaldehyde	93.05	C10H12O3	Organic oxygen compounds	Organooxygen compounds	HMDB0037602	NA	NA	3-Methoxybenzenepropanoic acid;4-Ethoxy-3-methoxybenzaldehyde;2-Phenyl-1,3-dioxolane-4-methanol;1-(2,4-Dihydroxyphenyl)-1-butanone;Benzaldehyde glyceryl acetal;Propylparaben;Ethyl p-anisate;4-Methoxybenzyl acetate;4-Hydroxy-2,6,6-trimethyl-3-oxo-1,4-cyclohexadiene-1-carboxaldehyde;Propyl 2-furanacrylate;3-(3-Hydroxyphenyl)-2-methylpropionic acid;10-hydroxy-(2E,8E)-decadien-4-ynoic Acid;2-Methyl-2…	1.31391e+06	1.5291e+06	1.11803e+06	1.71813e+06	2.73333e+06	1.12898e+06	746236	2.90448e+06	821155	890389	597209	3.36233e+06	871346	711904	545131	510050	202615	27478.4	2.19642e+06	2.26164e+06	751872	755261	444769	1.51959e+06	749049	944970	604724	947471	1.17527e+06	1.46047e+06	890074	1.6408	up	0.0447821	0.217728	1.49781	yes
POS	POS_332.243_4.0507	332.243	4.0507	4-Hydroxydecanoylcarnitine	91.73	C17H33NO5	Lipids and lipid-like molecules	Fatty Acyls	NA	NA	NA	3-hydroxydecanoyl carnitine;7-Hydroxydecanoylcarnitine;6-Hydroxydecanoylcarnitine;2-Hydroxydecanoylcarnitine;8-Hydroxydecanoylcarnitine;5-Hydroxydecanoylcarnitine;4-Hydroxydecanoylcarnitine;9-Hydroxydecanoylcarnitine;2-Undecyl-4(1H)-quinolinone N-oxide	365966	58700.2	138558	290814	259247	469368	290948	144807	665525	44826.5	198376	488889	178489	113235	983051	503388	845964	396767	1.37427e+06	505657	353844	326011	258355	402597	332472	320835	470420	510106	403267	264839	541695	0.4889	down	0.002362	0.0290332	1.84116	yes
NEG	NEG_151.04_3.7199	151.04	3.7199	4-Hydroxyphenylacetic acid	82.46	C8H8O3	Benzenoids	Phenols	HMDB0000020	C00642	map00350(Tyrosine metabolism);map00360(Phenylalanine metabolism);map00946(Degradation of flavonoids);map01100(Metabolic pathways);map01120(Microbial metabolism in diverse environments);map01220(Degradation of aromatic compounds)	p-Hydroxyphenylacetic acid;3-Hydroxyphenylacetic acid;ortho-Hydroxyphenylacetic acid;Mandelic acid;p-Anisic acid;3-Cresotinic acid;3,4-Dihydroxyphenylacetaldehyde;4-Hydroxy-3-methylbenzoic acid;Vanillin;2,4'-Dihydroxyacetophenone;2',3'-Dihydroxyacetophenone;2',4'-Dihydroxyacetophenone;2',6'-Dihydroxyacetophenone;3',4'-Dihydroxyacetophenone;3',5'-Dihydroxyacetophenone;Phenoxyacetic acid;Methyl fur…	359417	144614	127791	260302	194002	120844	198983	192538	212798	270494	201348	238773	292783	169239	92934.5	295741	71905.1	240009	195448	100655	246822	141598	112518	162404	119791	118741	125867	126176	183376	213138	153615	1.3875	up	0.0142053	0.104603	1.08169	yes
NEG	NEG_151.04_3.403	151.04	3.403	4-Methoxy-Benzoic acid	98.13	C8H8O3	Benzenoids	Benzene and substituted derivatives	NA	NA	NA	p-Hydroxyphenylacetic acid;3-Hydroxyphenylacetic acid;ortho-Hydroxyphenylacetic acid;Mandelic acid;p-Anisic acid;3-Cresotinic acid;3,4-Dihydroxyphenylacetaldehyde;4-Hydroxy-3-methylbenzoic acid;Vanillin;2,4'-Dihydroxyacetophenone;2',3'-Dihydroxyacetophenone;2',4'-Dihydroxyacetophenone;2',6'-Dihydroxyacetophenone;3',4'-Dihydroxyacetophenone;3',5'-Dihydroxyacetophenone;Phenoxyacetic acid;Methyl fur…	882749	253207	536839	1.08466e+06	239831	634487	146159	483853	337415	709147	171777	297787	186741	137120	168249	2.7657e+06	279298	236798	8.91962e+06	1.11142e+06	292064	1.37174e+06	830237	473345	1.28731e+06	492003	941028	611093	924346	435841	1.41285e+06	0.3085	down	0.0349624	0.188533	1.46671	yes
POS	POS_274.2_4.1859	274.2	4.1859	4-Methylhexanoylcarnitine	89.47	C14H27NO4	Lipids and lipid-like molecules	Fatty Acyls	NA	NA	NA	Heptanoylcarnitine;4-Methylhexanoylcarnitine;5-Methylhexanoylcarnitine;3-Methylhexanoylcarnitine;5-Nonyltetrahydro-2-oxo-3-furancarboxylic acid;Monomenthyl succinate;(6R,8Z)-6-Hydroxy-3-oxotetradecenoic acid;(6S,8Z)-6-Hydroxy-3-oxotetradecenoic acid	225406	556815	713463	227777	396573	1.0849e+06	631798	959523	1.02975e+06	582105	551211	1.56988e+06	342066	231462	1.0996e+06	1.17159e+06	1.1249e+06	2.39334e+06	1.71083e+06	757081	1.01648e+06	768033	755193	796472	1.18211e+06	844564	959291	1.32386e+06	893075	650195	1.13595e+06	0.5724	down	0.00192407	0.0250864	1.7624	yes
NEG	NEG_199.007_4.226	199.007	4.226	4-Vinylphenol sulfate	87.43	C8H8O4S	Organic acids and derivatives	Organic sulfuric acids and derivatives	HMDB0062775	NA	NA	4-Vinylphenol sulfate;Fluoronaphthyridone;1-(2-Thienyl)-1,2-propanedione;4-Mercaptobenzoic acid;Thiosalicylic acid;thioquinone	1.34387e+07	8.50434e+06	4.02347e+06	9.72198e+06	5.68126e+06	2.90663e+06	2.52397e+06	1.78685e+06	3.63872e+06	2.97207e+06	3.60482e+06	1.69936e+06	4.44831e+06	4.88672e+06	964846	1.95145e+06	923503	1.67681e+06	673237	1.09103e+06	687343	440783	1.09923e+06	3.39709e+06	811325	482742	491678	342027	3.03108e+06	4.98837e+06	1.07379e+06	4.6456	up	4.63087e-07	5.50412e-05	2.94901	yes
POS	POS_478.291_6.654	478.291	6.654	4-[5-[[4-[5-[acetyl(hydroxy)amino]pentylamino]-4-oxobutanoyl]-hydroxyamino]pentylamino]-4-oxobutanoic acid	75.37	C20H36N4O8	Lipids and lipid-like molecules	Fatty Acyls	NA	NA	NA	LysoPE(0:0/18:2(9Z,12Z));LysoPE(18:2(9Z,12Z)/0:0);VAPIPROST;3-Hydroxylinoleoylcarnitine;(9Z,12Z)-6-Hydroxyoctadeca-9,12-dienoylcarnitine;(11E,13Z)-10-Hydroxyoctadeca-11,13-dienoylcarnitine;(12Z,15Z)-10-Hydroxyoctadeca-12,15-dienoylcarnitine;(11E,13E)-9-Hydroxyoctadeca-11,13-dienoylcarnitine;(8E,12Z)-10-Hydroxyoctadeca-8,12-dienoylcarnitine;(9S,10E,12Z)-9-Hydroxyoctadeca-10,12-dienoylcarnitine;1-(…	3.91673e+08	1.85311e+08	1.38513e+08	3.64027e+08	3.58313e+08	1.24692e+08	1.3911e+08	2.19294e+08	1.18604e+08	2.07266e+08	2.24608e+08	1.01574e+08	1.40267e+08	2.21162e+08	1.17078e+08	8.57011e+07	1.3734e+08	9.27054e+07	8.62632e+07	8.69904e+07	8.59218e+07	4.78971e+07	1.12227e+08	5.90432e+07	7.11169e+07	8.76456e+07	1.0148e+08	1.15176e+08	1.5075e+08	2.09601e+08	9.18989e+07	2.2808	up	1.5423e-05	0.000810634	1.98776	yes
NEG	NEG_151.026_1.3752	151.026	1.3752	5,7-Dihydro-2-methylthieno[3,4-d]pyrimidine	78.85	C7H8N2S	Organoheterocyclic compounds	Thienopyrimidines	HMDB0041565	NA	NA	Xanthine;Oxypurinol;6,8-Dihydroxypurine;Peracetic acid;1,2,3-Trioxolane;Monomethyl carbonate;L-Glyceric acid;Propaneperoxoic acid, 2-hydroxy-;2-(Hydroxymethoxy)acetic acid;Hydroxymethyl hydrogen carbonate	902150	925826	874472	613426	991700	1.24693e+06	1.29906e+06	1.58225e+06	2.55686e+06	990697	577488	857000	1.23216e+06	1.40553e+06	1.29316e+06	2.43343e+06	1.64408e+06	5.10097e+06	2.12817e+06	1.40725e+06	1.71523e+06	2.30758e+06	1.17248e+06	2.40893e+06	2.87573e+06	1.65386e+06	1.11104e+06	1.79861e+06	1.61093e+06	1.14683e+06	2.07504e+06	0.5527	down	0.000609606	0.0113673	1.57592	yes
POS	POS_299.138_5.0559	299.138	5.0559	5,7-Dimethoxy-6-methylflavanone	77.26	C18H18O4	Phenylpropanoids and polyketides	Flavonoids	HMDB0038453	NA	NA	Carisoprodol;Falcarindiol;Panaxydol;1,8-Heptadecadiene-4,6-diyne-3,10-diol;2-Polyprenyl-6-methoxyphenol;1,9-Heptadecadiene-4,6-diyne-3,8-diol, (3S,8S,9Z)-;Patchoulen-beta;Juzirine;Acetoxyacetylaminofluorene;indoprofen;N-Nitrosocimetidine;(-)-Norushinsunine	829738	3.00572e+06	2.93779e+06	1.54986e+06	1.14249e+06	1.23316e+06	1.9423e+06	2.95868e+06	3.91688e+06	1.06051e+06	453195	3.92211e+06	4.39418e+06	1.09507e+06	2.94679e+06	2.88813e+06	9.274e+06	4.46548e+06	7.44763e+06	2.06574e+06	3.3659e+06	1.71133e+06	4.99583e+06	6.0096e+06	5.03268e+06	3.99141e+06	8.51213e+06	3.56363e+06	3.454e+06	2.17441e+06	4.73359e+06	0.4594	down	0.000923359	0.0151004	1.94155	yes
NEG	NEG_305.248_8.6594	305.248	8.6594	5,8,11-Eicosatrienoic acid	90.29	C20H34O2	Lipids and lipid-like molecules	Fatty Acyls	HMDB0010378	NA	NA	Dihomo-gamma-linolenic acid;5,8,11-Eicosatrienoic acid;Sciadonic acid;Sagittariol;Dihomo-alpha-linolenic acid;11-Eicosatrienoic acid;Eicosa-11,14,17-trienoic acid;Eicosa-5,8,11-trienoic acid;5,11,14-Eicosatrienoic acid;Dihomo--linolenic acid;Icosa-2,4,6-trienoic acid;Ethyl octadeca-9,12,15-trienoate;Ethyl alpha-linolenate;ent-16b-Kauran-16,19-diol;Ethyl linilenate;Sodium octadecanoate;5alpha-Andr…	7.40051e+07	3.37647e+07	6.99424e+07	3.98971e+07	5.1502e+07	2.21983e+08	6.50243e+07	4.93639e+07	1.14044e+08	3.10696e+07	2.6477e+07	2.14561e+08	3.66085e+07	2.91861e+07	1.11865e+08	6.95368e+07	8.03559e+07	1.0104e+08	9.10521e+07	1.15551e+08	6.72603e+07	6.8127e+07	8.58817e+07	2.01539e+08	1.97928e+08	9.22497e+07	1.42129e+08	6.44394e+07	9.09423e+07	7.55307e+07	1.06354e+08	0.7102	down	0.0210652	0.137173	1.43805	yes
NEG	NEG_307.228_8.4494	307.228	8.4494	5-Ethyl-3,4-dimethyl-2-furanundecanoic acid	85.74	C19H32O3	Lipids and lipid-like molecules	Fatty Acyls	HMDB0112070	NA	NA	Obtusilactone A;3-Methyl-5-pentyl-2-furannonanoic acid;Annosquamosin B;3-Methyl-5-propyl-2-furanundecanoic acid;3,4-Dimethyl-5-propyl-2-furandecanoic acid;5-Ethyl-3,4-dimethyl-2-furanundecanoic acid;5-Hexyl-3,4-dimethyl-2-furanheptanoic acid;3,4-Dimethyl-5-pentyl-2-furanoctanoic acid;5-Butyl-3,4-dimethyl-2-furannonanoic acid;5alpha-Androstane-3beta,7alpha,17beta-triol;2-[2-(4-Nonylphenoxy)ethoxy]…	1.25711e+06	951523	2.23769e+06	1.76231e+06	2.13631e+06	5.61472e+06	977385	2.70912e+06	3.84208e+06	1.43364e+06	523803	5.03932e+06	508210	354485	5.03425e+06	3.3604e+06	4.48653e+06	4.05339e+06	5.20573e+06	3.65202e+06	3.07428e+06	2.77447e+06	3.66174e+06	7.24149e+06	5.09458e+06	4.21201e+06	8.25854e+06	2.93512e+06	3.29972e+06	2.09626e+06	4.50318e+06	0.4655	down	0.000630803	0.0115665	2.2347	yes
NEG	NEG_293.212_8.4494	293.212	8.4494	5-Hexyl-2-furanoctanoic acid	70.47	C18H30O3	Lipids and lipid-like molecules	Fatty Acyls	HMDB0112099	C13798	NA	13-OxoODE;9-OxoODE;A-12(13)-EpODE;13-HOTE;15(16)-EpODE;9(10)-EpODE;9-HOTE;17-Hydroxylinolenic acid;10-Oxo-11-octadecen-13-olide;Squamostanal A;15,16-Epoxy-9,12-octadecadienoic acid;(2'E,4'Z,8E)-Colneleic acid;12,13-Epoxy-9,15-octadecadienoic acid;2-Hydroxylinolenic acid;(9S,10E,12Z,15Z)-9-Hydroxy-10,12,15-octadecatrienoic acid;(9Z,12Z,14E)-16-Hydroxy-9,12,14-octadecatrienoic acid;Sterebin D;3,4-D…	1.26711e+06	1.17245e+06	3.12522e+06	2.23859e+06	1.56306e+06	7.95257e+06	1.38038e+06	3.59723e+06	3.02536e+06	2.17721e+06	1.55574e+06	6.19284e+06	1.18127e+06	1.14453e+06	7.02584e+06	2.89516e+06	3.63941e+06	6.0774e+06	5.13089e+06	4.41398e+06	2.54987e+06	3.15286e+06	4.51352e+06	9.4022e+06	4.63554e+06	5.77892e+06	1.14103e+07	3.11233e+06	3.97542e+06	2.68383e+06	5.26702e+06	0.5096	down	0.000862851	0.0143548	1.90851	yes
POS	POS_304.211_4.0394	304.211	4.0394	5-Hydroxyoctanoylcarnitine	86.95	C15H29NO5	Lipids and lipid-like molecules	Fatty Acyls	NA	NA	NA	3-hydroxyoctanoyl carnitine;5-Hydroxyoctanoylcarnitine;7-Hydroxyoctanoylcarnitine;6-Hydroxyoctanoylcarnitine;4-Hydroxyoctanoylcarnitine;5-Hydroxy-2-propylpentanoylcarnitine;3-v-2-propylpentanoylcarnitine;4-Hydroxy-2-propylpentanoylcarnitine;1-[(5-Methoxy-2,3-dihydro-1H-indol-3-yl)methylideneamino]-2-pentylguanidine;Thonzylamine	5.32575e+06	4.12715e+06	4.20923e+06	2.61537e+06	4.10855e+06	1.2516e+07	8.0948e+06	3.97028e+06	9.43579e+06	4.07058e+06	2.75917e+06	1.40794e+07	2.39159e+06	686271	1.98436e+07	1.36903e+07	1.24354e+07	8.81985e+06	1.14598e+07	1.76659e+07	9.35408e+06	9.28893e+06	7.97892e+06	1.96755e+07	1.19649e+07	8.05287e+06	1.37394e+07	1.85892e+07	9.31959e+06	5.59928e+06	1.30399e+07	0.4294	down	0.000223992	0.00575634	2.25434	yes
NEG	NEG_215.033_0.742	215.033	0.742	5-Methoxypsoralen	70.39	C12H8O4	Phenylpropanoids and polyketides	Coumarins and derivatives	HMDB0030637	C01557	map00999(Biosynthesis of various plant secondary metabolites);map01061(Biosynthesis of phenylpropanoids);map01110(Biosynthesis of secondary metabolites)	Methoxsalen;Bergapten;Isobergapten;Sphondin;Sodium ferulate;2-C-methyl-D-erythritol-4-phosphate;D-Glucose;D-Galactose;D-Mannose;myo-Inositol;3-Deoxyarabinohexonic acid;D-Fructose;Allose;L-Sorbose;Paraxanthine;Theophylline;Theobromine;alpha-D-Glucose;D-Tagatose;beta-D-Galactose;scyllo-Inositol;L-Gulose;Dihydroxyacetone (dimer);L-Galactose;Levoinositol;muco-Inositol;Glycoprotein-phospho-D-mannose;e…	3.54081e+08	2.86172e+08	2.54553e+08	2.76323e+08	2.72808e+08	2.6579e+08	3.57491e+08	2.74261e+08	2.64782e+08	3.12477e+08	3.03677e+08	2.58761e+08	2.66785e+08	2.57681e+08	2.14711e+08	2.03908e+08	1.91141e+08	2.45021e+08	2.22007e+08	2.03811e+08	2.27934e+08	2.30062e+08	2.13136e+08	2.61318e+08	2.14397e+08	1.85748e+08	2.23144e+08	2.27059e+08	2.52466e+08	2.86117e+08	2.18814e+08	1.3076	up	3.01803e-07	3.89113e-05	1.23816	yes
POS	POS_302.231_4.7828	302.231	4.7828	5-Methyloctanoylcarnitine	92.77	C16H31NO4	Lipids and lipid-like molecules	Fatty Acyls	NA	NA	NA	2,6 Dimethylheptanoyl carnitine;Nonanoylcarnitine;6-Methyloctanoylcarnitine;5-Methyloctanoylcarnitine;4-Methyloctanoylcarnitine;7-Methyloctanoylcarnitine;3-Methyloctanoylcarnitine;N-Lauroyl Threonine;Tetranorprostanedioic acid;hexadecanedioate	537545	1.80199e+06	2.29192e+06	1.93785e+06	1.92473e+06	3.03028e+06	3.58824e+06	7.44108e+06	5.17073e+06	4.37442e+06	1.86389e+06	1.00165e+07	1.49361e+06	631074	4.61041e+06	6.67887e+06	8.13208e+06	5.61692e+06	8.70145e+06	5.33174e+06	5.38269e+06	4.93531e+06	3.83362e+06	3.76305e+06	6.01298e+06	6.14853e+06	4.0107e+06	8.87398e+06	4.57629e+06	3.29313e+06	5.85945e+06	0.562	down	0.00257024	0.0309358	1.95367	yes
NEG	NEG_128.035_0.8085	128.035	0.8085	5-OXO-L-PROLINE	86.98	C5H7NO3	Organic acids and derivatives	Carboxylic acids and derivatives	HMDB0000267	C01879	map00480(Glutathione metabolism);map01100(Metabolic pathways)	Pyroglutamic acid;Pyrroline hydroxycarboxylic acid;N-Acryloylglycine;1-Pyrroline-4-hydroxy-2-carboxylate;dimethadione;(3R,5S)-1-pyrroline-3-hydroxy-5-carboxylic Acid;3-Hydroxy-1-methylpyrrolidine-2,5-dione;4-Oxo-L-proline;1-Methylpyrrole-2,3,5-triol;pyrrolidone carboxylic acid;(2S)-6-Oxa-1-azabicyclo[3.1.0]hexane-2-carboxylic acid;Oxazine;2-Cyanoethylene oxide;ISOXAZOLE;Oxazole	5.25231e+06	3.4079e+06	5.60435e+06	3.43093e+06	5.32447e+06	3.16301e+06	5.87066e+06	5.45921e+06	6.9678e+06	2.37152e+06	3.22066e+06	3.12553e+06	3.86215e+06	4.91947e+06	1.06401e+07	1.26034e+07	9.44608e+06	8.19754e+06	8.68401e+06	9.00914e+06	7.41779e+06	8.59707e+06	7.39862e+06	9.56514e+06	9.60323e+06	8.42896e+06	6.66145e+06	8.35679e+06	6.6639e+06	4.42714e+06	8.90067e+06	0.4974	down	2.68859e-07	3.54361e-05	2.10306	yes
NEG	NEG_279.223_8.0171	279.223	8.0171	5-Octadecynoic acid	96.81	C18H32O2	Lipids and lipid-like molecules	Fatty Acyls	HMDB0031097	NA	NA	NA	1.51074e+07	5.3037e+06	1.13296e+07	1.2176e+07	6.17329e+06	2.45082e+07	6.26255e+06	1.66426e+07	1.6547e+07	7.25456e+06	6.02877e+06	2.78317e+07	2.40614e+06	1.76982e+06	3.53118e+07	1.83286e+07	2.16734e+07	1.63171e+07	1.87922e+07	1.84285e+07	1.13605e+07	1.21561e+07	2.54185e+07	3.6932e+07	2.32187e+07	2.42397e+07	5.82296e+07	1.00999e+07	1.74946e+07	1.13815e+07	2.36076e+07	0.4821	down	0.00216066	0.0272891	1.95813	yes
NEG	NEG_295.838_4.6009	295.838	4.6009	5-bromo-2,3,4-trichloroindole	73.16	NA	NA	NA	NA	NA	NA	NA	158728	273979	77351.7	182166	119934	66589.8	71383.4	110105	179247	59732.1	80055.2	250244	100991	146560	57032.1	51342.8	56215.3	151141	33378.4	130608	65727.6	67808.5	77798.5	19848	12186.8	63348.7	33211.7	101493	99936	134076	65795.7	2.0378	up	0.00196505	0.0254959	1.76802	yes
NEG	NEG_143.108_4.6323	143.108	4.6323	5-methylheptanoic acid	86.01	C8H16O2	Lipids and lipid-like molecules	Fatty Acyls	NA	NA	NA	Caprylic acid;Valproic acid;Hexyl acetate;(3R,5Z)-5-Octene-1,3-diol;2-Ethylhexanoic acid;1-Hydroxy-3-octanone;Methyl heptanoate;Ethyl (&#177;)-2-methylpentanoate;2-Methylheptanoic acid;6-Methylheptanoic acid;Methyl 5-methylhexanoate;Pentyl propanoate;2-Ethylbutyl acetate;Isopropyl 3-methylbutanoate;Propyl 3-methylbutanoate;cis- and trans-2-Isobutyl-4-methyl-1,3-dioxolane;1,1-Dimethoxy-trans-2-hex…	163955	206310	217440	208876	125237	251452	207098	226771	693364	209408	224768	681067	148756	207231	1.49015e+06	220252	1.16275e+06	238128	736275	392415	249432	308199	458025	396981	642027	413226	411889	542550	408358	269409	547307	0.4922	down	0.00221476	0.0276337	1.66445	yes
NEG	NEG_435.347_9.0406	435.347	9.0406	5a-Cholestane-3a,7a,12a,25-tetrol	90.69	C27H48O4	Lipids and lipid-like molecules	Glycerophospholipids	HMDB0000520	NA	NA	5a-Cholestane-3a,7a,12a,25-tetrol;27-Deoxy-5b-cyprinol;5b-Cholestane-3a,7a,12a,23-Tetrol;27-Deoxy-5alpha-cyprinol;5beta-Cholestane-3alpha,7alpha,24,26-tetrol;(3beta,5alpha,12beta)-Cholestane-3,7,12,25-tetrol;5-Nonadecyl-1,3-benzenediol	4.89372e+06	7.97247e+06	4.28502e+06	5.98856e+06	3.39274e+06	8.26167e+06	4.51606e+06	4.03871e+06	9.24512e+06	4.27245e+06	1.12788e+07	7.68367e+06	2.724e+06	7.09192e+06	1.34102e+07	5.37805e+06	2.37438e+07	1.16544e+07	6.48496e+06	8.58279e+06	6.11667e+06	4.65732e+06	7.06311e+06	1.31603e+07	9.37287e+06	7.10451e+06	1.58603e+07	1.51968e+07	8.33682e+06	6.11749e+06	1.05561e+07	0.5795	down	0.00517427	0.0509467	1.3672	yes
POS	POS_178.024_0.8068	178.024	0.8068	6,7-Dihydroxycoumarin	75.79	C9H6O4	Phenylpropanoids and polyketides	Coumarins and derivatives	HMDB0030819	C09263	map00999(Biosynthesis of various plant secondary metabolites);map01061(Biosynthesis of phenylpropanoids);map01110(Biosynthesis of secondary metabolites)	N-Methylethanolaminium phosphate;Cytosine-5-carboxylic acid;6-hydroxy-2-cyclohexen-one-carboxylate	9.11169e+06	6.14308e+06	6.47391e+06	1.06329e+07	9.75441e+06	6.13696e+06	9.7372e+06	7.60346e+06	1.18517e+07	8.97641e+06	6.47491e+06	8.33841e+06	9.3904e+06	1.14844e+07	3.3966e+06	8.05976e+06	5.51419e+06	8.68269e+06	9.01758e+06	6.02053e+06	8.60578e+06	8.29739e+06	3.02127e+06	7.13789e+06	1.09253e+07	7.48493e+06	2.39048e+06	4.46673e+06	7.68325e+06	8.72213e+06	6.64436e+06	1.3127	up	0.0250687	0.15266	1.00868	yes
POS	POS_384.273_5.3043	384.273	5.3043	6-Hydroxytrtradeca-9,12-dienoylcarnitine	91.67	C21H37NO5	Lipids and lipid-like molecules	Fatty Acyls	NA	NA	NA	3-Hydroxy-5,8-tetradecadienoylcarnitine;(5Z,8Z)-3-Hydroxytetradecadienoylcarnitine;6-Hydroxytrtradeca-8,11-dienoylcarnitine;7-Hydroxytrtradeca-9,11-dienoylcarnitine;6-Hydroxytrtradeca-8,10-dienoylcarnitine;5-Hydroxytrtradeca-7,9-dienoylcarnitine;5-Hydroxytrtradeca-8,11-dienoylcarnitine;4-Hydroxytrtradeca-6,8-dienoylcarnitine;3-Hydroxytrtradeca-6,9-dienoylcarnitine;4-Hydroxytrtradeca-7,10-dienoylc…	842219	1.35667e+06	652494	1.15201e+06	1.01959e+06	1.83445e+06	1.34135e+06	1.47643e+06	1.84377e+06	1.39759e+06	610739	2.28723e+06	406313	159263	4.25889e+06	1.78952e+06	3.23756e+06	2.00211e+06	2.08342e+06	2.42451e+06	2.40373e+06	1.16986e+06	1.36958e+06	3.95907e+06	2.04505e+06	1.55856e+06	2.40414e+06	2.66057e+06	1.77667e+06	1.17001e+06	2.38332e+06	0.4909	down	0.000997847	0.0158892	1.93551	yes
NEG	NEG_241.217_8.5079	241.217	8.5079	6-Methyltetradecanoic acid	96.96	C15H30O2	Lipids and lipid-like molecules	Fatty Acyls	NA	NA	NA	Methyl tetradecanoate;Dodecyl propionate;Hexyl nonanoate;Heptyl octanoate;Octyl heptanoate;Pentyl decanoate;3-Methylbutyl decanoate;7(14)-Farnesene-9,12-diol;2,6,10-Trimethyldodecanoic acid;Isopropyl_laurate;Ethyl tridecanoate;Cyclotetradecane;(E)-7-Tetradecene;1-Tetradecene;3-Tetradecene;1-Tridecene;6-Tridecene	8.95998e+07	5.71551e+07	1.33852e+08	7.41247e+07	6.58829e+07	9.34879e+07	6.24093e+07	1.3481e+08	1.57831e+08	6.55674e+07	5.69905e+07	1.82186e+08	7.80997e+07	1.16093e+08	1.84138e+08	1.48099e+08	1.39909e+08	1.27819e+08	1.85985e+08	1.54599e+08	1.55773e+08	1.5224e+08	1.54933e+08	1.40712e+08	2.24616e+08	1.46403e+08	3.39482e+08	1.52619e+08	1.34836e+08	9.77206e+07	1.71952e+08	0.5683	down	7.15561e-05	0.00246138	1.71907	yes
POS	POS_396.273_5.7321	396.273	5.7321	7-(3-Methyl-5-propylfuran-2-yl)heptanoylcarnitine	86.26	C22H37NO5	Lipids and lipid-like molecules	Fatty Acyls	NA	NA	NA	Prostaglandin E2 ethanolamide;PGD2 ethanolamide;5-(3-Methyl-5-pentylfuran-2-yl)pentanoylcarnitine;7-(3-Methyl-5-propylfuran-2-yl)heptanoylcarnitine;3-hydroxytridecanoyl carnitine;Annoglabasin F;1,9-Dideoxyforskolin;[(1S,2R,3S,4S,6R,7R,14R)-4-Ethenyl-3-hydroxy-2,4,7,14-tetramethyl-9-oxo-6-tricyclo[5.4.3.01,8]tetradecanyl] 2-hydroxyacetate;Dhv-PGE2	51988.6	49380.9	106242	183993	165892	62579.8	153246	277157	83586.6	88305.7	6525.63	944188	114480	14869.5	347410	240303	456076	117435	457283	755301	402151	293795	404140	587023	295651	325824	284286	630281	282121	164460	399783	0.4114	down	0.00075241	0.0130971	2.52831	yes
POS	POS_410.289_5.4747	410.289	5.4747	7-(5-Pentylfuran-2-yl)heptanoylcarnitine	91.6	C23H39NO5	Lipids and lipid-like molecules	Fatty Acyls	NA	NA	NA	5-(3,4-Dimethyl-5-pentylfuran-2-yl)pentanoylcarnitine;6-(5-Hexylfuran-2-yl)hexanoylcarnitine;7-(3,4-Dimethyl-5-propylfuran-2-yl)heptanoylcarnitine;7-(5-Pentylfuran-2-yl)heptanoylcarnitine;8-(5-Butylfuran-2-yl)octanoylcarnitine;N-Linoleoyl Glutamic acid;2-Hydroxymyristoylcarnitine;3-Hydroxytetradecanoyl carnitine;Deoxyspergualin;Tresperimus;20, 22-Dihydrodigoxigenin;VIPROSTOL;MG(20:4(6E,8Z,11Z,14Z…	640672	232203	147874	265947	132017	421106	309726	394138	295419	178894	141539	1.09974e+06	111901	47822	612915	653349	549526	365564	413435	610076	434257	397143	303751	612301	417643	399712	322732	618727	397505	315643	479366	0.6585	down	0.00807423	0.0700222	1.60905	yes
POS	POS_187.144_1.2718	187.144	1.2718	7-Ethyl-3,6-dihydro-1,4-dimethylazulene	72.42	C14H18	Hydrocarbons	Unsaturated hydrocarbons	HMDB0036471	NA	NA	3-[(3-Methylbutyl)nitrosoamino]-2-butanone;1-Hydroxy-2,2,5,5-tetramethylpyrrolidine-3-carboxamide;Dimethyl pimelimidate;Homoarecoline	4.51851e+06	3.83957e+06	2.68877e+06	4.0035e+06	2.38835e+06	4.67213e+06	4.6038e+06	2.02671e+06	5.383e+06	5.63703e+06	5.38474e+06	5.16294e+06	1.43732e+06	920307	599072	327435	153349	203076	269838	634557	448415	848571	305898	334889	312514	198817	304995	631395	2.07998e+06	3.7619e+06	398059	9.4506	up	2.23084e-11	3.29965e-08	3.86995	yes
NEG	NEG_251.201_7.8342	251.201	7.8342	7-hexadecynoic acid	95.48	C16H28O2	Lipids and lipid-like molecules	Fatty Acyls	NA	NA	NA	7Z,10Z-Hexadecadienoic acid;Geranyl hexanoate;Linalyl hexanoate;(Z)-7-Hexadecen-1,16-olide;Isoambrettolide;D6-Ambrettolide;Geranyl 2-ethylbutyrate;Ethyl (Z,Z)-5,8-tetradecadienoate;7-Hexadecynoic acid;Hexadecadienoic acid;Canavalmine;(E)-2-octenal;2-Octenal;(3xi,5Z)-1,5-Octadien-3-ol;2,4,4-Trimethylcyclopentanone;2-Octen-4-one;1-Octen-3-one;3-Methyl-3-hepten-2-one;5-Methyl-5-hepten-2-one;6-Methyl…	1.72003e+07	8.93942e+06	2.6789e+07	1.31417e+07	1.86589e+07	5.43301e+07	1.16452e+07	2.28726e+07	3.7375e+07	9.84531e+06	7.27618e+06	6.26021e+07	8.1787e+06	5.94647e+06	5.92266e+07	3.1538e+07	5.50415e+07	5.08945e+07	3.74209e+07	5.44904e+07	2.71046e+07	3.03697e+07	4.97059e+07	1.13199e+08	6.96966e+07	4.25565e+07	1.04708e+08	2.31035e+07	3.76378e+07	2.17715e+07	5.3504e+07	0.4069	down	0.000173685	0.0047875	2.28402	yes
POS	POS_261.057_0.9136	261.057	0.9136	7-hydroxy-2-phenylchromen-4-one	81.94	C15H10O3	Phenylpropanoids and polyketides	Flavonoids	NA	NA	NA	Suprofen;Tiaprofenic acid;Keto-3-deoxy-D-manno-octulosonic acid;Acefylline;2-Keto-3-Deoxy-D-Mannooctanoic Acid;Furapyrimidone;Rufinamide;3-deoxy-D-manno-octulosonate	1.87006e+07	1.23592e+07	1.99962e+07	1.34976e+07	1.37444e+07	4.66398e+06	1.10117e+07	2.29278e+06	1.5156e+07	1.53284e+07	6.04563e+07	1.49998e+07	9.53781e+06	4.16915e+06	79251.5	3532.72	14281.2	82947.3	7.2785e+06	75122.4	683770	1.7293e+06	723464	42058.2	71844.1	928445	893168	129043	8.16603e+06	1.54224e+07	909623	16.9547	up	2.07545e-06	0.000185633	4.9296	yes
NEG	NEG_329.239_8.1407	329.239	8.1407	7Z, 10Z, 13Z, 16Z, 19Z-docosapentaenoic acid	96.6	C22H34O2	Lipids and lipid-like molecules	Fatty Acyls	NA	NA	NA	NA	2.38391e+06	3.35667e+06	1.21835e+07	2.79291e+06	5.38826e+06	1.43764e+07	3.84609e+06	9.37116e+06	7.26141e+06	3.87774e+06	2.51498e+06	3.66481e+07	3.36875e+06	1.55654e+06	1.46514e+07	1.00405e+07	7.03525e+06	7.91179e+06	1.63412e+07	1.44594e+07	1.03136e+07	1.11807e+07	1.08244e+07	2.64465e+07	1.48869e+07	1.03776e+07	1.61883e+07	1.05438e+07	1.03617e+07	7.78046e+06	1.29429e+07	0.6011	down	0.00289037	0.0336524	1.99209	yes
POS	POS_330.263_5.3738	330.263	5.3738	8-Methyldecanoylcarnitine	98.38	C18H35NO4	Lipids and lipid-like molecules	Fatty Acyls	NA	NA	NA	4,8 Dimethylnonanoyl carnitine;Undecanoylcarnitine;5-Methyldecanoylcarnitine;4-Methyldecanoylcarnitine;6-Methyldecanoylcarnitine;8-Methyldecanoylcarnitine;7-Methyldecanoylcarnitine;3-Methyldecanoylcarnitine;9-Methyldecanoylcarnitine;N-Myristoyl Threonine;13-L-Hydroperoxylinoleic acid;8(R)-Hydroperoxylinoleic acid;9(S)-HPODE;12,13-DiHODE;15,16-DiHODE;9,10-DiHODE;(&#177;)-(E)-13-Hydroxy-10-oxo-11-o…	826366	1.27851e+06	4.08193e+06	546475	1.91182e+06	3.95966e+06	2.46283e+06	3.98563e+06	4.41281e+06	1.851e+06	1.59377e+06	6.56146e+06	1.20009e+06	518929	2.89533e+06	7.00162e+06	9.30806e+06	9.4017e+06	7.49413e+06	3.81014e+06	5.81009e+06	5.06334e+06	2.73566e+06	3.07404e+06	4.56621e+06	5.54947e+06	3.1131e+06	9.80766e+06	4.10078e+06	2.51366e+06	5.6879e+06	0.4419	down	0.00063923	0.0116727	2.14256	yes
NEG	NEG_279.232_8.4494	279.232	8.4494	9(E),11(E)-Conjugated Linoleic Acid	96.95	C18H32O2	NA	NA	NA	NA	NA	Linoleic acid;(9E,11E)-Octadecadienoic acid;Linoelaidic acid;Mangiferic acid;Linalyl caprylate;Ethyl 2E,4Z-hexadecadienoate;5-Octadecynoic acid;Dihomolinoleic acid;6Z,9Z-octadecadienoic acid;Octadecadienoate;Octadeca-10,12-dienoic acid;17-Octadecynoic acid;7-Octadecynoic acid;8,12-Octadecadienoic acid;Octadeca-9,11-dienoic acid;9Z,12E-Octadecadienoic acid;Octadeca-2,4-dienoic acid;Malvalic acid;O…	1.66309e+09	2.0411e+09	4.04674e+09	3.17207e+09	2.96787e+09	7.71793e+09	2.31539e+09	4.3416e+09	4.46297e+09	2.9291e+09	1.49185e+09	6.32072e+09	1.30828e+09	1.00889e+09	6.65708e+09	4.48268e+09	5.8465e+09	5.39399e+09	5.60452e+09	5.43979e+09	4.34742e+09	4.31626e+09	5.02957e+09	8.93104e+09	6.64822e+09	5.79393e+09	9.7897e+09	4.26538e+09	4.58334e+09	3.27054e+09	5.89615e+09	0.5547	down	0.000659733	0.0119814	1.87414	yes
NEG	NEG_293.212_8.0191	293.212	8.0191	9(S)-HOTrE	74.69	C18H30O3	Lipids and lipid-like molecules	Fatty Acyls	NA	NA	NA	13-OxoODE;9-OxoODE;A-12(13)-EpODE;13-HOTE;15(16)-EpODE;9(10)-EpODE;9-HOTE;17-Hydroxylinolenic acid;10-Oxo-11-octadecen-13-olide;Squamostanal A;15,16-Epoxy-9,12-octadecadienoic acid;(2'E,4'Z,8E)-Colneleic acid;12,13-Epoxy-9,15-octadecadienoic acid;2-Hydroxylinolenic acid;(9S,10E,12Z,15Z)-9-Hydroxy-10,12,15-octadecatrienoic acid;(9Z,12Z,14E)-16-Hydroxy-9,12,14-octadecatrienoic acid;Sterebin D;3,4-D…	738634	1.08064e+06	1.19742e+06	950046	896022	1.31971e+06	1.44158e+06	1.05759e+06	1.17197e+06	1.27345e+06	1.26354e+06	2.72989e+06	1.29482e+06	1.18528e+06	4.45136e+06	3.43282e+06	5.94049e+06	5.35937e+06	5.98912e+06	3.69885e+06	5.10319e+06	4.57616e+06	3.75251e+06	8.06844e+06	8.03572e+06	7.08084e+06	4.31088e+06	2.89607e+06	3.22487e+06	1.25718e+06	5.19256e+06	0.2421	down	2.73168e-12	1.21214e-08	3.04101	yes
NEG	NEG_275.201_7.6868	275.201	7.6868	9,12-Octadecadiynoic Acid	97.78	C18H28O2	Lipids and lipid-like molecules	Fatty Acyls	NA	NA	NA	19-Nor-5-androstenediol;19-Noretiocholanolone;Stearidonic acid;Phenethyl decanoate;4,8,12,15-Octadecatetraenoic acid;(E,E)-11,13-Octadecadien-9-ynoic acid;17beta-hydroxy-5beta-estran-3-one;Octadeca-6,9,12,15-tetraenoic acid;9,12-Octadecadiynoic acid;cis-Parinaric acid;Bolandiol;Octadeca-2,4,6,8-tetraenoic acid;2-Pentylfuran;(3Z,6Z)-3,6-Nonadienal;3,5,5-Trimethyl-2-cyclohexen-1-one;(2E,6E)-2,6-Non…	1.65842e+07	3.81505e+06	6.40642e+06	1.05692e+07	4.95349e+06	1.97197e+07	3.5688e+06	7.16216e+06	1.11785e+07	3.63048e+06	2.95286e+06	4.33993e+07	3.29109e+06	6.23456e+06	3.06852e+07	1.67251e+07	1.71705e+07	1.66455e+07	1.02199e+07	2.2675e+07	1.01903e+07	1.41527e+07	1.87617e+07	3.60415e+07	1.98052e+07	1.68278e+07	3.23884e+07	8.95962e+06	1.48112e+07	1.02476e+07	1.93749e+07	0.5289	down	0.00138244	0.0200469	1.93873	yes
POS	POS_314.231_4.9615	314.231	4.9615	9-Decenoylcarnitine	80.33	C17H31NO4	Lipids and lipid-like molecules	Fatty Acyls	HMDB0013205	NA	NA	9-Decenoylcarnitine;(4Z)-Decenoylcarnitine;cis-4-Decenoyl carnitine;(6E)-8-Methylnon-6-enoylcarnitine;3-Decenoylcarnitine;6-Decenoylcarnitine;7-Decenoylcarnitine;5-Decenoylcarnitine;2-Decenoylcarnitine;(8Z)-Decenoylcarnitine;Decenoylcarnitine;Tanacetol B;(1(10)E,4a,5E)-1(10),5-Germacradiene-12-acetoxy-4,11-diol;[6]-Gingerdiol	1.09369e+07	4.79199e+07	3.22749e+07	4.48162e+07	2.89363e+07	5.80896e+07	5.42389e+07	7.13327e+07	1.16334e+08	5.68951e+07	2.97271e+07	1.08676e+08	2.07105e+07	1.08466e+07	2.44171e+08	7.29185e+07	2.02008e+08	8.79626e+07	1.16803e+08	8.62004e+07	4.93217e+07	6.62226e+07	4.39283e+07	1.13595e+08	9.71027e+07	8.47139e+07	8.05326e+07	1.11614e+08	7.67439e+07	4.94097e+07	1.04078e+08	0.4747	down	0.00124608	0.0186597	1.97687	yes
NEG	NEG_293.212_7.411	293.212	7.411	9-KODE	81.05	C18H30O3	Lipids and lipid-like molecules	Fatty Acyls	HMDB0004669	C14766	map00591(Linoleic acid metabolism)	13-OxoODE;9-OxoODE;A-12(13)-EpODE;13-HOTE;15(16)-EpODE;9(10)-EpODE;9-HOTE;17-Hydroxylinolenic acid;10-Oxo-11-octadecen-13-olide;Squamostanal A;15,16-Epoxy-9,12-octadecadienoic acid;(2'E,4'Z,8E)-Colneleic acid;12,13-Epoxy-9,15-octadecadienoic acid;2-Hydroxylinolenic acid;(9S,10E,12Z,15Z)-9-Hydroxy-10,12,15-octadecatrienoic acid;(9Z,12Z,14E)-16-Hydroxy-9,12,14-octadecatrienoic acid;Sterebin D;3,4-D…	993866	528283	1.20632e+06	319937	1.46518e+06	4.98554e+06	1.64203e+06	1.05362e+06	1.31887e+06	1.40911e+06	1.70051e+06	2.67379e+06	1.2685e+06	1.28806e+06	3.77433e+06	2.75255e+06	2.18996e+06	2.54307e+06	1.94284e+06	2.04948e+06	1.32975e+06	2.3231e+06	2.09267e+06	4.14e+06	5.76799e+06	2.02219e+06	3.36798e+06	939158	2.11031e+06	1.56097e+06	2.65965e+06	0.5869	down	0.00686317	0.0622796	1.5137	yes
POS	POS_372.31_6.4742	372.31	6.4742	9-Methyltridecanoylcarnitine	90.83	C21H41NO4	Lipids and lipid-like molecules	Fatty Acyls	NA	NA	NA	4-Methyltridecanoylcarnitine;11-Methyltridecanoylcarnitine;3-Methyltridecanoylcarnitine;5-Methyltridecanoylcarnitine;8-Methyltridecanoylcarnitine;7-Methyltridecanoylcarnitine;6-Methyltridecanoylcarnitine;9-Methyltridecanoylcarnitine;12-Methyltridecanoylcarnitine;10-methyltridecanoylcarnitine;N-Stearoyl Serine;Myristoylcarnitine;MG(0:0/18:2(9Z,12Z)/0:0);MG(18:2(9Z,12Z)/0:0/0:0);Glyceryl monolinole…	7.29496e+06	4.477e+06	3.55495e+06	3.72842e+06	4.4231e+06	9.53275e+06	7.62806e+06	4.15296e+06	1.36811e+07	6.09774e+06	2.71461e+06	1.45211e+07	3.01721e+06	1.89805e+06	1.60066e+07	1.17163e+07	1.95037e+07	8.67174e+06	1.80243e+07	9.29798e+06	9.48523e+06	7.67592e+06	7.83152e+06	1.01193e+07	1.37517e+07	8.4267e+06	1.17153e+07	1.61627e+07	9.1111e+06	6.19443e+06	1.20278e+07	0.515	down	0.000342303	0.00773436	1.93195	yes
POS	POS_344.279_5.804	344.279	5.804	9-Methylundecanoylcarnitine	87.54	C19H37NO4	Lipids and lipid-like molecules	Fatty Acyls	NA	NA	NA	Dodecanoylcarnitine;8-Methylundecanoylcarnitine;7-Methylundecanoylcarnitine;6-Methylundecanoylcarnitine;4-Methylundecanoylcarnitine;5-Methylundecanoylcarnitine;10-Methylundecanoylcarnitine;9-Methylundecanoylcarnitine;3-Methylundecanoylcarnitine;N-Palmitoyl Serine;N-Hexadecanoyl-serine;1-Acetoxy-2-hydroxy-16-heptadecen-4-one;Avocadyne 2-acetate;Avocadyne 1-acetate;Avocadyne 4-acetate	1.00863e+07	1.21445e+07	9.72007e+06	6.06435e+06	8.51092e+06	3.13903e+07	1.5425e+07	6.61931e+06	5.60839e+07	1.10655e+07	5.73822e+06	6.15005e+07	4.80861e+06	2.5501e+06	6.86976e+07	2.92985e+07	8.07722e+07	2.16391e+07	5.69166e+07	3.27199e+07	2.50157e+07	2.38944e+07	1.40573e+07	3.84896e+07	4.94341e+07	2.11174e+07	3.56079e+07	5.361e+07	2.83206e+07	1.72648e+07	3.93765e+07	0.4385	down	0.00056897	0.0108608	2.30343	yes
NEG	NEG_299.258_7.6072	299.258	7.6072	9R,10S-EpOME	82.88	C18H32O3	Lipids and lipid-like molecules	Fatty Acyls	HMDB04701	C14825	map00591(Linoleic acid metabolism);map01100(Metabolic pathways)	NA	1.38466e+07	2.80786e+06	3.35433e+06	3.08692e+06	5.04954e+06	2.89309e+06	2.95923e+06	3.84986e+06	1.07612e+07	3.92409e+06	2.70368e+06	1.12057e+07	3.4753e+06	3.77074e+06	1.41199e+07	1.33082e+07	1.31492e+07	3.82183e+06	3.67161e+06	9.55469e+06	1.53968e+07	1.16944e+07	1.1932e+07	1.04465e+07	1.31773e+07	1.1118e+07	1.96143e+07	1.10535e+07	8.41951e+06	5.26344e+06	1.15756e+07	0.4547	down	0.000150209	0.00428177	2.0302	yes
NEG	NEG_329.19_4.5537	329.19	4.5537	AB-Pinaca	96.33	C18H26N4O2	Organic acids and derivatives	Carboxylic acids and derivatives	NA	NA	NA	Chembl4513510;13-OxoODE;9-OxoODE;A-12(13)-EpODE;13-HOTE;15(16)-EpODE;9(10)-EpODE;9-HOTE;17-Hydroxylinolenic acid;10-Oxo-11-octadecen-13-olide;Squamostanal A;15,16-Epoxy-9,12-octadecadienoic acid;(2'E,4'Z,8E)-Colneleic acid;12,13-Epoxy-9,15-octadecadienoic acid;2-Hydroxylinolenic acid;(9S,10E,12Z,15Z)-9-Hydroxy-10,12,15-octadecatrienoic acid;(9Z,12Z,14E)-16-Hydroxy-9,12,14-octadecatrienoic acid;St…	1.27886e+06	1.34777e+06	929424	1.51188e+06	856174	824880	1.12078e+06	2.50334e+06	2.7138e+06	1.57238e+06	1.93442e+06	1.15051e+06	1.73469e+06	1.75776e+06	705540	747077	692433	967974	621985	1.25943e+06	550948	2.21788e+06	514892	726529	950319	1.01078e+06	1.17918e+06	886293	1.22385e+06	1.51691e+06	930804	1.6297	up	0.00162431	0.0222622	1.41385	yes
POS	POS_356.278_5.7756	356.278	5.7756	ACar 13:1	96.12	NA	NA	NA	NA	NA	NA	Tridec-3-enoylcarnitine;Tridec-5-enoylcarnitine;Tridec-8-enoylcarnitine;(11E)-Tridec-11-enoylcarnitine;Tridec-2-enoylcarnitine;Tridec-4-enoylcarnitine;Tridec-6-enoylcarnitine;(9E)-Tridec-9-enoylcarnitine;Tridec-7-enoylcarnitine;Tridec-10-enoylcarnitine;Dimethylsphingosine;14,15-DiHETrE;8,9-DiHETrE;11,12-DiHETrE;5,6-DHET;12-Keto-tetrahydro-leukotriene B4;10,11-dihydro-leukotriene B4;6,7-dihydro-12…	936838	2.27749e+06	4.51829e+06	3.18053e+06	2.66511e+06	4.6392e+06	7.87782e+06	1.32738e+07	6.44204e+06	6.78892e+06	3.48994e+06	1.44637e+07	2.48165e+06	905783	9.64532e+06	1.6076e+07	1.01844e+07	5.01001e+06	1.42166e+07	8.86052e+06	1.00082e+07	7.46063e+06	6.64053e+06	6.23714e+06	1.27567e+07	5.47209e+06	1.03647e+07	1.62292e+07	7.61083e+06	5.2815e+06	9.94015e+06	0.5313	down	0.00247995	0.0301214	1.97306	yes
POS	POS_392.279_5.8024	392.279	5.8024	ACar 16:4	85.37	NA	NA	NA	NA	NA	NA	N-Stearoyltaurine;N-Arachidonoyl Serine;N-Myristoyl Tyrosine;cis-5-Tetradecenoylcarnitine;(4Z)-Tetradec-4-enoylcarnitine;(7Z)-Tetradec-7-enoylcarnitine;N-Oleoyl-L-Serine;hydroxytetradecadienyl-l-carnitine;Tetradecenoylcarnitine;Calcitroic acid;(-)-Folicanthine;Digitoxigenin;Rostafuroxin	1.62342e+06	1.20269e+06	1.2045e+06	820330	801059	2.23799e+06	1.76223e+06	1.72104e+06	2.75802e+06	1.36556e+06	617263	9.2535e+06	567078	261341	3.12558e+06	3.60248e+06	3.64033e+06	2.021e+06	2.78724e+06	4.6491e+06	2.40415e+06	2.9927e+06	1.66481e+06	4.09713e+06	3.21825e+06	2.08473e+06	2.07711e+06	4.10354e+06	2.45229e+06	1.87114e+06	3.03344e+06	0.6168	down	0.0035564	0.0389653	1.87458	yes
POS	POS_424.341_6.9785	424.341	6.9785	ACar 18:2	83.13	NA	NA	NA	NA	NA	NA	O-Linoleoylcarnitine;(10Z,12Z)-octadeca-10,12-dienoylcarnitine;(9Z,11E)-Octadeca-9,11-dienoylcarnitine;(6Z,9Z)-Octadeca-6,9-dienoylcarnitine;(2E,4E)-Octadeca-2,4-dienoylcarnitine;MG(0:0/22:4(7Z,10Z,13Z,16Z)/0:0);MG(22:4(7Z,10Z,13Z,16Z)/0:0/0:0);[14]-Gingerol	2.19572e+07	2.23854e+07	2.17815e+07	2.61556e+07	2.63764e+07	2.11905e+07	3.6933e+07	3.38485e+07	2.93015e+07	2.40535e+07	1.80701e+07	2.66829e+07	1.99445e+07	1.33895e+07	8.35083e+07	8.77267e+07	6.61526e+07	7.22574e+07	7.76034e+07	6.81502e+07	4.21325e+07	4.81787e+07	7.1659e+07	7.19539e+07	4.91723e+07	6.01569e+07	5.58367e+07	4.80878e+07	4.44517e+07	2.44336e+07	6.44697e+07	0.379	down	7.13432e-11	7.30555e-08	2.49207	yes
POS	POS_575.502_8.0355	575.502	8.0355	AEG(o-16:2/18:2)	90.05	NA	NA	NA	NA	NA	NA	Lauroyl diethanolamide;Montecristin;Dieporeticanin	7.40463e+06	2.70624e+06	3.1121e+06	3.77166e+06	6.19665e+06	4.0383e+06	2.71775e+06	2.757e+06	2.96018e+06	4.2482e+06	3.61309e+06	1.74148e+06	3.48273e+06	5.99674e+06	2.54797e+06	1.19264e+06	3.05155e+06	2.53221e+06	1.71156e+06	2.51681e+06	3.24725e+06	2.41273e+06	2.326e+06	2.37903e+06	3.35628e+06	2.5246e+06	2.65655e+06	4.01545e+06	3.25776e+06	3.91048e+06	2.60505e+06	1.5011	up	0.00832287	0.07148	1.18164	yes
POS	POS_599.5_8.0047	599.5	8.0047	AEG(o-18:4/18:2)	71.56	NA	NA	NA	NA	NA	NA	Pentadecanoylglycine;N-Lauroyl Valine;N-Myristoyl Alanine;Cohibin C;Cohibin D	6.89976e+06	2.33637e+06	2.92181e+06	2.84727e+06	5.7035e+06	3.35857e+06	2.38324e+06	2.50867e+06	2.78342e+06	3.16966e+06	2.8312e+06	1.8574e+06	2.42593e+06	6.13396e+06	2.27395e+06	1.4115e+06	2.19373e+06	3.46484e+06	1.77825e+06	3.10491e+06	2.30767e+06	2.48439e+06	2.05468e+06	1.88183e+06	3.5452e+06	1.70422e+06	2.05352e+06	3.26745e+06	2.91739e+06	3.44005e+06	2.39472e+06	1.4365	up	0.0214534	0.1385	1.0518	yes
POS	POS_481.215_4.9239	481.215	4.9239	ANTHOTHECOL	97	C28H32O7	Lipids and lipid-like molecules	Prenol lipids	NA	NA	NA	Hydroxystrobilurin D;fumagillin;Cinobufotalin;Pivampicillin;Dihydroisomorphine-3-glucuronide;Dihydromorphine-3-glucuronide;Etodolac acyl glucuronide;Dihydroisomorphine-6-glucuronide;(2S,3R)-3-(4-Hydroxyphenyl)-2-(4-{[(2S)-2-pyrrolidin-1-ylpropyl]oxy}phenyl)-2,3-dihydro-1,4-benzoxathiin-6-OL;1-Methyl-5-(4-benzoyl)pyrrole-2-acetic acid 2-(theophylline-7-yl)ethyl ester	37907.8	27153.7	18583.8	74263.1	41840.5	22942.9	37902.8	52755.4	63478.1	34956	42885	36382.1	86968.3	44946.2	144948	199333	254401	216302	225585	119485	140596	102996	144553	210806	142751	144402	126679	172707	106018	44497.6	167539	0.2656	down	8.70032e-10	5.16916e-07	2.98923	yes
POS	POS_298.096_3.6119	298.096	3.6119	Adenosine + C2H5S	86.93	C11H15N5O3S	NA	NA	NA	NA	NA	NA	2.27263e+06	1.67803e+06	1.9416e+06	2.04002e+06	1.84392e+06	1.54929e+06	786799	1.32e+06	1.24159e+06	1.44054e+06	1.68396e+06	1.63142e+06	1.56136e+06	2.04032e+06	825185	736997	694276	1.18297e+06	1.01044e+06	1.2164e+06	1.36761e+06	1.00015e+06	896684	949585	844538	715207	876461	1.04943e+06	1.29991e+06	1.64511e+06	954709	1.7231	up	3.59124e-06	0.000282879	1.6876	yes
POS	POS_446.325_6.3574	446.325	6.3574	Ala-UDCA	72.3	C27H45NO5	Lipids and lipid-like molecules	Steroids and steroid derivatives	NA	NA	NA	N-Oleoyl tyrosine;(5Z,8Z,10E,12E,14Z)-Icosa-5,8,10,12,14-pentaenoylcarnitine;(5Z,8Z,11Z,14Z,17Z)-Icosa-5,8,11,14,17-pentaenoylcarnitine;(2S,3S,5S,8S,9S,10S,13S,14S,17S)-17-Acetyl-2-(2,2-dimethylmorpholino)-3-hydroxy-10,13-dimethylhexadecahydro-11H-cyclopenta[a]phenanthren-11-one;O-Linoleoylcarnitine;(10Z,12Z)-octadeca-10,12-dienoylcarnitine;(9Z,11E)-Octadeca-9,11-dienoylcarnitine;(6Z,9Z)-Octadeca…	883746	730521	411594	1.56987e+06	513689	333133	167338	159513	274667	528944	545181	124205	562493	382714	204429	298886	694736	99290.1	125118	237472	96564.9	79079.1	40608.7	44926.7	140160	217271	146259	73917.9	345940	513401	178480	2.8765	up	0.000389961	0.0085101	2.23452	yes
POS	POS_422.325_6.5498	422.325	6.5498	Alpha-linolenyl carnitine	79.41	C25H43NO4	Lipids and lipid-like molecules	Fatty Acyls	HMDB0006319	NA	NA	Gamma-linolenyl carnitine;Alpha-linolenyl carnitine;(9Z,11E,13Z)-Octadeca-9,11,13-trienoylcarnitine;(5Z,9Z,12Z)-Octadeca-5,9,12-trienoylcarnitine;(8E,10E,12Z)-Octadeca-8,10,12-trienoylcarnitine;L-Palmitoylcarnitine;O-Palmitoylcarnitine;12-Methylpentadecanoylcarnitine;9-Methylpentadecanoylcarnitine;5-Methylpentadecanoylcarnitine;6-Methylpentadecanoylcarnitine;11-Methylpentadecanoylcarnitine;3-Meth…	7.49973e+06	3.14681e+06	1.56536e+06	3.2192e+06	2.10828e+06	1.84345e+06	3.83351e+06	3.41004e+06	3.1788e+06	2.72693e+06	1.94902e+06	3.53328e+06	1.4373e+06	1.24028e+06	1.3212e+07	1.02634e+07	7.12072e+06	7.91222e+06	6.50017e+06	7.32174e+06	3.06139e+06	4.83482e+06	1.05685e+07	6.93079e+06	4.51138e+06	8.11865e+06	6.90105e+06	4.69692e+06	5.09449e+06	2.90657e+06	7.28241e+06	0.3991	down	3.99391e-06	0.000298691	2.27935	yes
NEG	NEG_505.338_5.24	505.338	5.24	Anadur	72.3	C33H46O4	Lipids and lipid-like molecules	Steroids and steroid derivatives	NA	NA	NA	N-Arachidonoyl Arginine;Succistearin	28075	60450	4474.79	264720	7165.39	119883	228278	168999	196947	138266	60338.6	111916	13089.8	62908.9	149440	343320	338632	617476	597539	125047	281775	489302	90602.3	9792.12	69423.4	91276.6	248005	71778.8	178176	104679	251672	0.4159	down	0.040379	0.204672	1.65	yes
NEG	NEG_255.114_4.4826	255.114	4.4826	Ancymidol	86.91	C15H16N2O2	Benzenoids	Phenol ethers	NA	NA	NA	1-(9H-Pyrido[3,4-b]indol-1-yl)-1,4-butanediol;N-(4-Amino-5-methoxy-2-methylphenyl)benzamide;Ancymidol;Nafagrel;2,6-Di-tert-butylbenzoquinone;3-Phenylpropyl isovalerate;13-Nor-6-eremophilene-8,11-dione;Hexyl phenylacetate;2-Phenylethyl hexanoate;(Z)-6-Tetradecene-1,3-diyne-5,8-diol;13-Tetradecene-1,3-diyne-6,7-diol;3,4-Dihydro-2,2,5,7,8-pentamethyl-2H-1-benzopyran-6-ol;2-Methyl-1-phenyl-2-propanyl…	3.31966e+06	618108	546875	411082	374373	391900	600883	1.06141e+06	1.0406e+06	200883	159939	1.41664e+06	1.26e+06	412233	1.07886e+06	864656	2.21554e+06	1.2521e+06	3.31832e+06	635471	798411	556593	696445	1.52867e+06	811938	698380	2.40331e+06	1.11797e+06	1.06397e+06	843899	1.28405e+06	0.6572	down	0.0342164	0.186427	1.31278	yes
NEG	NEG_428.265_7.3899	428.265	7.3899	Andrastin D	80.84	C26H36O5	Lipids and lipid-like molecules	Steroids and steroid derivatives	NA	NA	NA	N-Palmitoyl Histidine;3-Hydroxy-5,8-tetradecadienoylcarnitine;(5Z,8Z)-3-Hydroxytetradecadienoylcarnitine;6-Hydroxytrtradeca-8,11-dienoylcarnitine;7-Hydroxytrtradeca-9,11-dienoylcarnitine;6-Hydroxytrtradeca-8,10-dienoylcarnitine;5-Hydroxytrtradeca-7,9-dienoylcarnitine;5-Hydroxytrtradeca-8,11-dienoylcarnitine;4-Hydroxytrtradeca-6,8-dienoylcarnitine;3-Hydroxytrtradeca-6,9-dienoylcarnitine;4-Hydroxyt…	1.24426e+07	1.64558e+07	5.80366e+06	1.4909e+07	1.69112e+07	8.586e+06	1.02768e+07	1.09162e+07	1.29325e+07	1.44613e+07	1.42346e+07	6.0553e+06	1.32167e+07	1.50716e+07	9.36584e+06	6.9528e+06	1.70054e+07	1.17397e+07	5.28185e+06	4.57163e+06	7.95366e+06	7.3276e+06	4.23827e+06	5.539e+06	7.26898e+06	1.01908e+07	8.70528e+06	3.63029e+06	1.0073e+07	1.23052e+07	7.84079e+06	1.5694	up	0.00260269	0.0312417	1.37361	yes
POS	POS_212.999_0.8256	212.999	0.8256	Antipyrene	78.39	C3H9N4OPS2	Organic acids and derivatives	Organic phosphonic acids and derivatives	NA	NA	NA	Pentafluorobenzoic acid;Oxalosuccinic acid;Allo-hydroxycitric acid lactone;oxalosuccinate	8.30082e+06	1.35681e+07	1.0404e+07	1.00044e+07	1.27352e+07	7.80175e+06	1.14854e+07	8.59367e+06	1.21303e+07	7.82753e+06	1.28515e+07	1.33284e+07	6.94334e+06	7.63741e+06	9.93457e+06	6.11037e+06	7.53206e+06	5.76816e+06	6.58379e+06	9.11173e+06	5.93817e+06	8.18467e+06	5.57819e+06	5.49501e+06	6.77538e+06	4.29658e+06	9.01711e+06	5.89439e+06	8.56543e+06	1.0258e+07	6.87287e+06	1.4925	up	0.000138506	0.0040523	1.41305	yes
NEG	NEG_314.122_5.4663	314.122	5.4663	Antramycin	75.55	C16H17N3O4	Organoheterocyclic compounds	Benzodiazepines	NA	NA	NA	Neosaxitoxin;N'-Hydroxysaxitoxin;Di-deacetyl adrogolide;4-(3'-Methylaminopropylidene)-9,10-dihydro-4H-benzo(4,5)cyclohepta(1,2-b)thiophen	134185	159686	79090.4	98902.7	131655	103489	166256	180030	168450	76558.7	117400	216677	190624	118429	196925	194058	294075	259353	421644	147441	159707	146934	151184	288955	246151	243179	233388	203952	183156	138674	227639	0.6092	down	0.000304283	0.00720751	1.49512	yes
NEG	NEG_622.354_8.9063	622.354	8.9063	Apicidin	77.44	C34H49N5O6	Organic acids and derivatives	Carboxylic acids and derivatives	NA	NA	NA	NA	5.50805e+06	3.35171e+06	2.78669e+06	3.45728e+06	1.04818e+06	2.79836e+06	1.99039e+06	1.96946e+06	5.84743e+06	4.77477e+06	2.26197e+06	6.65834e+06	1.39332e+06	2.96411e+06	4.39559e+06	1.41052e+07	7.26683e+06	8.78572e+06	9.12274e+06	2.00181e+06	4.0572e+06	2.40016e+06	4.56732e+06	3.15063e+06	1.98921e+06	4.26848e+06	4.93066e+06	6.37785e+06	4.43677e+06	3.34358e+06	5.52996e+06	0.6046	down	0.0350547	0.188739	1.15652	yes
NEG	NEG_251.165_7.1427	251.165	7.1427	Apotrichodiol	97	C15H24O3	Organoheterocyclic compounds	Tetrahydrofurans	HMDB0034574	NA	NA	1-Hydroxyepiacorone;Acorusdiol;3(4-&gt;5)-Abeo-4,11:4,12-diepoxy-3-eudesmanol;(4R,5S,7R,11R)-11,12-Dihydroxy-1(10)-spirovetiven-2-one;Apotrichodiol;6alpha-Carissanol;alpha-Carissanol;Epioxylubimin;Dihydromyoporone;Piperalol;Zedoarondiol;Hydroxypelenolide;Toxin FS2;Urodiolenone;Bisacurone B;2,3-Dihydroabscisic alcohol;3-Methyl-5-pentyl-2-furanpentanoic acid;3-Methyl-5-propyl-2-furanheptanoic acid;…	565757	115078	686140	248495	340312	775832	262024	527131	488053	271839	34335.3	4.10919e+06	59556	18355.2	1.35073e+06	733731	1.4957e+06	507435	1.10133e+06	1.65151e+06	1.4758e+06	848512	1.82121e+06	1.67202e+06	1.55267e+06	1.22474e+06	1.3408e+06	1.15386e+06	944004	607293	1.28072e+06	0.4742	down	0.00130156	0.0192729	2.63585	yes
NEG	NEG_131.035_0.7502	131.035	0.7502	Arabinose	73.98	C5H10O5	Organic oxygen compounds	Organooxygen compounds	HMDB0000646	C02479	NA	Monoethyl malonic acid;Ethylmalonic acid;Glutaric acid;Methylsuccinic acid;Dimethylmalonic acid;2-Acetolactate;2-C-Methyl-1,4-erythrono-D-lactone;2-Deoxy-L-ribono-1,4-lactone;2-Hydroxy-4-oxopentanoic acid;Monomethyl succinate;Dimethyl malonate;Formyl 3-hydroxybutanoate;gamma-Butyrolactone;Oxolan-3-one;Diacetyl;But-2-enoic acid;Ethenyl acetate;Methyl acrylate;Isocrotonic acid;2-Butyne-1,4-diol;2,2…	8.89484e+06	7.74898e+06	7.17452e+06	7.18269e+06	7.80323e+06	6.82083e+06	8.68812e+06	6.67389e+06	6.64618e+06	8.30669e+06	7.76057e+06	6.77024e+06	7.08915e+06	7.04919e+06	5.52167e+06	4.64681e+06	4.5712e+06	5.68923e+06	5.78981e+06	5.30965e+06	5.93202e+06	5.62051e+06	5.58914e+06	6.66338e+06	5.52078e+06	4.58895e+06	5.68452e+06	5.60578e+06	6.47652e+06	7.47208e+06	5.48096e+06	1.3633	up	1.433e-08	3.40643e-06	1.36788	yes
POS	POS_494.284_5.1273	494.284	5.1273	Arg Tyr Arg	96.73	C21H35N9O5	NA	NA	NA	NA	NA	O-[(9Z)-17-Carboxyheptadec-9-enoyl]carnitine;(9E)-Octadec-9-enedioylcarnitine;(11E)-Octadec-11-enedioylcarnitine;(9S,10E,12Z)-9-Hydroperoxyoctadeca-10,12-dienoylcarnitine;(9Z,11E,13S)-13-Hydroperoxyoctadeca-9,11-dienoylcarnitine	3.34712e+06	2.98535e+06	2.54543e+06	6.20532e+06	918855	2.75032e+06	2.51551e+06	1.78931e+06	1.54657e+06	2.43891e+06	3.11034e+06	982383	4.52005e+06	2.62441e+06	1.33096e+06	2.15966e+06	1.36748e+06	1.05208e+06	179767	1.06452e+06	1.03545e+06	1.19934e+06	668272	705497	385853	580831	750690	579683	1.83357e+06	2.73428e+06	932862	2.9311	up	2.59009e-05	0.00113047	2.35219	yes
POS	POS_175.118_1.3465	175.118	1.3465	Arginine	70.43	NA	NA	NA	HMDB0000517	C00062	map00220(Arginine biosynthesis);map00261(Monobactam biosynthesis);map00330(Arginine and proline metabolism);map00331(Clavulanic acid biosynthesis);map00470(D-Amino acid metabolism);map00970(Aminoacyl-tRNA biosynthesis);map00998(Biosynthesis of various antibiotics);map01060(Biosynthesis of plant secondary metabolites);map01064(Biosynthesis of alkaloids derived from ornithine, lysine and nicotinic …	L-Arginine;D-Arginine;Adipic dihydrazide;DL-Arginine;2-Amino-4-[carbamimidoyl(methyl)amino]butanoic acid;Isobutylidene;V-Pyrro/NO	4.41291e+06	6.14851e+06	5.66752e+06	1.00607e+07	5.84428e+06	3.68536e+06	6.77262e+06	8.02005e+06	5.16156e+06	5.86171e+06	6.11487e+06	4.85997e+06	7.49074e+06	7.80973e+06	3.90489e+06	3.84304e+06	5.93693e+06	5.83407e+06	3.91908e+06	4.61469e+06	3.48233e+06	6.68711e+06	2.07198e+06	5.39195e+06	3.70926e+06	5.70681e+06	2.78573e+06	4.39818e+06	5.36416e+06	6.27932e+06	4.449e+06	1.4114	up	0.00344003	0.0380979	1.16004	yes
POS	POS_355.126_4.4697	355.126	4.4697	Asarinin	73.16	C20H18O6	Lignans, neolignans and related compounds	Furanoid lignans	HMDB0034256	C10882	NA	Methyl fluoroquinolone;Allithiamine;N-[(4-Amino-2-methylpyrimidin-5-yl)methyl]-N-[5-hydroxy-3-(prop-2-enyldisulfanyl)pent-2-en-2-yl]formamide;meta-O-Dealkylated flecainide;S-Hydroxymethylglutathione;gamma-Glutamylcysteinylserine	381697	1.05999e+06	591796	508506	473182	426456	704450	1.66136e+06	1.16567e+06	33512.2	182181	1.73355e+06	1.79349e+06	478133	835929	988477	1.81104e+06	884199	3.12548e+06	449913	705593	602735	793624	2.27745e+06	1.08693e+06	1.11461e+06	2.68846e+06	1.63315e+06	1.07827e+06	799570	1.35697e+06	0.5892	down	0.0351067	0.188748	1.5406	yes
POS	POS_510.279_4.7565	510.279	4.7565	B16A16	97	NA	NA	NA	NA	NA	NA	Landiolol;Terfenadine;(10E,15Z)-9,12,13-Trihydroxyoctadeca-10,15-dienoylcarnitine;Vorapaxar;PA(2:0/18:1(12Z)-O(9S,10R));PA(18:1(12Z)-O(9S,10R)/2:0);PA(2:0/18:1(9Z)-O(12,13));PA(18:1(9Z)-O(12,13)/2:0)	307265	39291.8	456305	1.32841e+06	101261	477847	430017	265538	64258.9	416671	441449	317945	1.19491e+06	576639	617918	221872	89106.5	212135	399834	74382.4	218552	194797	125784	65721.9	72133.5	154852	246535	42083.7	326911	458414	195408	2.3459	up	0.0355804	0.190248	1.44761	yes
POS	POS_275.109_2.9027	275.109	2.9027	Bakers yeast extract	81.2	C19H14O2	Benzenoids	Fluorenes	HMDB0032173	NA	NA	Bakers yeast extract;N-(2-(3,4-Dichlorophenyl)ethyl)-N-methyl-2-(dimethylamino)ethylamine;Prolyl-Histidine;2,3-Butanediol glucoside;Histidinyl-Proline	1.01911e+06	243745	547794	510177	4.28378e+06	1.47798e+06	495561	237592	203095	244489	355136	177237	792641	4.38432e+06	149893	255261	164775	80475.7	191700	275299	177245	154004	338905	72254.5	104192	259977	414431	183848	635533	1.06948e+06	201590	5.3052	up	0.00131251	0.0193185	2.23457	yes
NEG	NEG_353.215_6.9087	353.215	6.9087	Barucainide	75.7	C22H30N2O2	Organic oxygen compounds	Organooxygen compounds	NA	NA	NA	Etretinate;Levonorgestrel acetate;Melengestrol;1,2,3-Tris(1-ethoxyethoxy)propane;(8R,9S,10S,13S,14S,17R)-16-Fluoro-17-hydroxy-10,13-dimethyl-1,2,4,5,6,7,8,9,11,12,14,15,16,17-tetradecahydrocyclopenta[a]phenanthren-3-one	1.99822e+06	1.09426e+06	797343	875608	1.72641e+06	1.21049e+06	842448	680577	1.45407e+06	1.54079e+06	971069	1.2705e+06	931787	1.22078e+06	633954	672220	889221	1.3234e+06	712601	772731	616460	929547	748501	599096	749661	742758	773025	665221	980098	1.18674e+06	773457	1.5343	up	0.000548686	0.0106164	1.32589	yes
NEG	NEG_215.032_1.0106	215.032	1.0106	Bergapten	76.71	C12H8O4	Phenylpropanoids and polyketides	Coumarins and derivatives	HMDB0030637	C01557	map00999(Biosynthesis of various plant secondary metabolites);map01061(Biosynthesis of phenylpropanoids);map01110(Biosynthesis of secondary metabolites)	Sodium ferulate;2-C-methyl-D-erythritol-4-phosphate;D-Glucose;D-Galactose;D-Mannose;myo-Inositol;3-Deoxyarabinohexonic acid;D-Fructose;Allose;L-Sorbose;Paraxanthine;Theophylline;Theobromine;alpha-D-Glucose;D-Tagatose;beta-D-Galactose;scyllo-Inositol;L-Gulose;Dihydroxyacetone (dimer);L-Galactose;Levoinositol;muco-Inositol;Glycoprotein-phospho-D-mannose;epi-Inositol;neo-Inositol;D-chiro-Inositol;ci…	4.21304e+07	5.39482e+07	5.40225e+07	5.17509e+07	6.06792e+07	5.48639e+07	5.95426e+07	4.56934e+07	5.48924e+07	5.90089e+07	5.0604e+07	4.17124e+07	5.47462e+07	5.42492e+07	3.17536e+07	2.84764e+07	2.69169e+07	3.92169e+07	3.80098e+07	2.88706e+07	3.57895e+07	3.53649e+07	2.87993e+07	3.92578e+07	3.60679e+07	2.47587e+07	3.07099e+07	3.70317e+07	4.28167e+07	5.27032e+07	3.29303e+07	1.6004	up	1.8494e-09	8.20642e-07	1.7357	yes
POS	POS_231.083_1.3929	231.083	1.3929	Beta-Asarone	97	C12H16O3	Benzenoids	Phenol ethers	HMDB0029872	C17821	NA	Ethyl beta-D-glucopyranoside;Dambonitol;Ethyl glucoside;3-Methyl-1-propylxanthine;7-Ethyltheophylline;Isobutylxanthine;2'',6''-O-Diacetyloninin;Ethyl beta-D-fructofuranoside	4.89375e+07	1.04341e+06	6.14861e+06	4.72213e+06	3.77308e+06	8.03135e+06	6.50814e+06	419352	2.003e+06	1.61557e+07	4.31034e+06	9.9171e+07	2.42282e+07	800086	2.40319e+06	6.42613e+06	465436	354962	9.67186e+06	1.93506e+06	1.14998e+06	1.99676e+06	6.05004e+06	779330	639325	504357	1.09885e+06	678275	9.3002e+06	1.61609e+07	2.43954e+06	6.6246	up	0.0108691	0.086433	2.2189	yes
NEG	NEG_526.213_3.8882	526.213	3.8882	Beta-Collatolic acid	72.35	C29H34O9	Phenylpropanoids and polyketides	Isocoumarins and derivatives	NA	NA	NA	Stallimycin;1,3-Dithiane-2-propanamine, N-(2-(3,4-dimethoxyphenyl)ethyl)-N-methyl-2-(2-naphthalenyl)-;Methyl 5-[(E)-1-(3,7-dimethyl-2-oxo-1,3-benzoxazol-5-yl)-6-methoxy-6-oxohex-1-enyl]-2-methoxy-3-methylbenzoate	88583.4	172106	36510.9	27649.9	181464	483173	29052.9	735653	295133	309387	353284	181830	263624	34296.5	490661	544550	132974	684322	276402	356554	228060	565607	338315	344360	328929	224192	431351	738856	317031	227982	406081	0.5614	down	0.00912416	0.0762501	1.82094	yes
NEG	NEG_321.21_6.9427	321.21	6.9427	Bis(2-ethylhexyl) hydrogen phosphate	72.8	C16H35O4P	Organic acids and derivatives	Organic phosphoric acids and derivatives	NA	NA	NA	NA	816715	441914	659591	454491	593383	568726	419009	317976	434836	589951	517694	298082	712024	843052	555149	368430	559782	496242	301739	675654	78189.7	1.05729e+06	278187	259070	413012	213422	96016.7	350254	477496	547675	407317	1.3446	up	0.0427239	0.211705	1.17428	yes
NEG	NEG_335.049_1.2584	335.049	1.2584	Bisphenol AF	78.05	C15H10F6O2	Benzenoids	Benzene and substituted derivatives	NA	NA	NA	Bisphenol AF;Thiamine hydrochloride;Disodium ethylenediaminetetraacetate;Carboxytolbutamide;Oryzenin;Uric acid;Sulfobutyl ether;Chlorpropamide;Butyl 2,4-dichlorophenoxyacetate	2.89626e+07	3.87074e+07	2.88561e+07	2.98606e+07	3.92686e+07	1.97362e+07	3.84957e+07	3.36528e+07	4.77203e+07	2.9283e+07	3.0621e+07	5.30223e+07	1.70213e+07	2.3319e+07	3.65655e+07	2.89996e+07	131055	145484	2.07942e+07	3.0666e+07	2.61367e+07	3.53433e+07	1.34417e+07	3.12873e+07	2.26908e+07	2.05332e+07	136749	2.12352e+07	2.66655e+07	3.27519e+07	2.0579e+07	1.5915	up	0.044693	0.217398	1.93946	yes
POS	POS_438.296_4.7861	438.296	4.7861	Bullatine B	97	C24H39NO6	Lipids and lipid-like molecules	Prenol lipids	NA	NA	NA	LysoPE(P-16:0/0:0);L-Palmitoylcarnitine;O-Palmitoylcarnitine;12-Methylpentadecanoylcarnitine;9-Methylpentadecanoylcarnitine;5-Methylpentadecanoylcarnitine;6-Methylpentadecanoylcarnitine;11-Methylpentadecanoylcarnitine;3-Methylpentadecanoylcarnitine;8-Methylpentadecanoylcarnitine;7-Methylpentadecanoylcarnitine;13-Methylpentadecanoylcarnitine;4-Methylpentadecanoylcarnitine;14-Methylpentadecanoylcar…	8228.61	149291	46541.2	436177	152975	29082.2	312935	945458	3566.97	64791.9	468377	7948.96	362660	4002.79	132438	148282	134596	336174	446498	329610	710083	110173	561617	336669	554528	204999	499415	223157	275724	213717	337731	0.6328	down	0.0160598	0.114081	2.21153	yes
NEG	NEG_85.0294_0.7503	85.0294	0.7503	Butanal, 2-oxo-	78.32	C4H6O2	Organic oxygen compounds	Organooxygen compounds	NA	NA	NA	gamma-Butyrolactone;Oxolan-3-one;Diacetyl;But-2-enoic acid;Ethenyl acetate;Methyl acrylate;Isocrotonic acid;2-Butyne-1,4-diol;2,2'-Bioxirane;Acetoacetaldehyde;Allyl formate;Cyclopropanecarboxylic acid;Butanal, 2-oxo-;METHACRYLIC ACID;Methylmalondialdehyde;Succinaldehyde;Allene;Cyclopropene;Propyne;Ethen-1,1-diyl;Acetylene	6.29407e+06	5.23513e+06	5.47162e+06	4.90546e+06	5.36302e+06	5.21469e+06	6.66276e+06	5.08957e+06	5.02651e+06	6.29987e+06	5.83273e+06	4.35233e+06	5.18062e+06	5.01029e+06	3.88734e+06	3.19958e+06	3.37366e+06	4.47174e+06	3.91123e+06	3.41699e+06	4.27128e+06	3.71898e+06	4.03534e+06	3.93416e+06	3.65241e+06	2.96261e+06	4.03257e+06	3.88142e+06	4.596e+06	5.42419e+06	3.76781e+06	1.4396	up	6.27571e-09	1.77894e-06	1.49197	yes
NEG	NEG_393.264_5.3042	393.264	5.3042	Butaprost (free acid)	75.38	C23H38O5	NA	NA	NA	NA	NA	11-Hydroxyeicosatetraenoate glyceryl ester;2-(14,15-Epoxyeicosatrienoyl) Glycerol;gemeprost;Norcholic acid;MG(20:3(5Z,8Z,11Z)-O(14R,15S)/0:0/0:0);MG(20:3(5Z,8Z,14Z)-O(11S,12R)/0:0/0:0);MG(20:3(5Z,11Z,14Z)-O(8,9)/0:0/0:0);MG(20:3(8Z,11Z,14Z)-O(5,6)/0:0/0:0);MG(20:4(5Z,8Z,11Z,14Z)-OH(20)/0:0/0:0);MG(20:4(6E,8Z,11Z,14Z)-OH(5S)/0:0/0:0);MG(20:4(5Z,8Z,11Z,14Z)-OH(19S)/0:0/0:0);MG(20:4(5Z,8Z,11Z,14Z)-O…	363250	115263	84784.1	500566	124277	130273	105604	223759	97732	166728	245635	31530.5	90595.6	49763.6	79301	63574	280939	67611	81770.8	55843.2	56574.3	47166.5	31724.1	39613	11904.1	78544.3	173888	59499.6	123490	166412	80568.1	2.0655	up	0.014247	0.1047	1.53292	yes
POS	POS_289.117_4.4976	289.117	4.4976	C.I. Natural Red 20	78.52	C16H16O5	Benzenoids	Naphthalenes	HMDB0030579	C10292	NA	N-Nitrosoproline;3-Carboxy-2,3,4,9-tetrahydro-1H-pyrido[3,4-b]indole-1-propanoic acid;5-(Aziridin-1-yl)-3-(hydroxymethyl)-2-(3-hydroxyprop-1-enyl)-1-methylindole-4,7-dione;N5-(4-Methoxybenzyl)glutamine;Musk tibetene;Koeniginequinone B;Pummeline;4-hydroxy ketorolac;Xanthoxotin	199718	532058	294773	290202	253462	236658	354758	666581	556684	129552	99118.2	690207	881276	228678	467476	384665	877167	501359	1.57351e+06	269378	389633	283033	402024	910629	508479	504102	1.03872e+06	650089	506214	386695	625733	0.618	down	0.0220644	0.140806	1.38163	yes
POS	POS_366.239_5.9064	366.239	5.9064	C17 Sphingosine-1-phosphate	87.7	C17H36NO5P	Organic acids and derivatives	Organic phosphoric acids and derivatives	NA	NA	NA	Margaroylglycine;N-Myristoyl Valine;n-methylsphingosine;Hydroxyethyl retinamide;Roxatidine acetate	121150	126701	255430	178813	108648	244285	251466	294788	173076	180805	72795.1	196263	186597	137655	429577	861097	567118	372097	666584	425441	560779	746290	579389	352930	818451	735019	622639	758319	393722	180605	606838	0.2976	down	1.14729e-09	6.36363e-07	2.77693	yes
POS	POS_316.247_5.2025	316.247	5.2025	CAR 10:0	83.19	C17H34NO4	Lipids and lipid-like molecules	Fatty Acyls	NA	NA	NA	Decanoylcarnitine;6-Methylnonanoylcarnitine;5-Methylnonanoylcarnitine;8-Methylnonanoylcarnitine;7-Methylnonanoylcarnitine;4-Methylnonanoylcarnitine;3-Methylnonanoylcarnitine;N-Myristoyl Serine	2.58832e+07	4.25518e+07	4.43873e+07	1.66079e+07	2.74338e+07	8.34226e+07	4.39764e+07	2.17038e+07	2.14752e+08	3.2064e+07	1.43075e+07	2.36909e+08	1.11913e+07	6.99229e+06	3.48378e+08	1.01377e+08	3.19418e+08	7.00474e+07	2.30242e+08	1.3129e+08	8.46379e+07	1.0243e+08	4.74555e+07	1.14599e+08	1.99193e+08	1.17284e+08	1.39965e+08	1.75159e+08	1.07274e+08	5.87273e+07	1.5582e+08	0.3769	down	0.000274525	0.0067178	2.56084	yes
POS	POS_328.247_5.1827	328.247	5.1827	CAR 11:1	93.84	C18H34NO4	Lipids and lipid-like molecules	Fatty Acyls	NA	NA	NA	NA	2.25212e+07	9.64991e+06	6.78101e+06	1.71529e+07	4.61887e+06	8.74143e+06	1.44288e+07	8.78108e+06	9.91542e+06	7.95836e+06	6.0725e+06	1.77345e+07	5.55651e+06	2.75551e+06	9.97148e+06	2.66464e+07	1.11517e+07	1.1183e+07	1.37366e+07	1.30038e+07	1.23963e+07	1.46172e+07	1.63799e+07	1.04925e+07	1.16608e+07	1.33675e+07	1.23311e+07	1.66953e+07	1.20108e+07	1.01906e+07	1.3831e+07	0.7368	down	0.0222999	0.14156	1.14038	yes
POS	POS_392.277_6.1096	392.277	6.1096	CAR 16:4	82.79	C23H38NO4	Lipids and lipid-like molecules	Fatty Acyls	NA	NA	NA	N-Arachidonoyl Serine;N-Myristoyl Tyrosine;cis-5-Tetradecenoylcarnitine;(4Z)-Tetradec-4-enoylcarnitine;(7Z)-Tetradec-7-enoylcarnitine;N-Oleoyl-L-Serine;hydroxytetradecadienyl-l-carnitine;Tetradecenoylcarnitine;Calcitroic acid;(-)-Folicanthine;Digitoxigenin;Rostafuroxin	256164	227365	263017	446502	346500	752971	632837	230769	881191	210677	301240	1.06313e+06	84136.3	76169.5	1.07196e+06	605752	1.11346e+06	438387	747065	734359	632738	484403	350793	688015	714430	262968	570807	825143	536177	412334	660020	0.6247	down	0.0107909	0.0861206	1.6232	yes
NEG	NEG_256.117_4.4771	256.117	4.4771	CARMOFUR	97	C11H16FN3O3	Organoheterocyclic compounds	Diazines	NA	C13252	map00983(Drug metabolism - other enzymes)	Methoxamine;Orciprenaline;Isoproterenol;mescaline;Metanephrine;Tenuazonic acid;Desglymidodrine;L-Metanephrine;1,2-octadienoylglycine;1,3-octadienoylglycine;1,4-octadienoylglycine;1,5-octadienoylglycine;1,6-octadienoylglycine;1,7-octadienoylglycine;2,3-octadienoylglycine;2,4-octadienoylglycine;2,5-octadienoylglycine;2,6-octadienoylglycine;2,7-octadienoylglycine;3,4-octadienoylglycine;3,5-octadieno…	229124	163489	82466.3	69551.2	59046.5	77012.2	109343	170295	147363	30086.5	27880	196364	274372	59929.2	134047	159685	373002	148205	652153	93442.8	123225	96633.1	120671	275667	140060	159471	419886	201293	171206	121166	221246	0.5477	down	0.0162989	0.115067	1.45544	yes
POS	POS_389.217_5.0426	389.217	5.0426	CC-401	72.01	C22H24N6O	Organoheterocyclic compounds	Azoles	NA	NA	NA	Laccarin;6-Hydroxypseudooxynicotine;alpha-(4-Pyridyl-1-oxide)-N-tert-butylnitrone;5a,6a-Epoxy-7E-megastigmene-3a,9e-diol 3-glucoside;9,13-Dihydroxy-4-megastigmen-3-one 9-glucoside;Icariside B8;5a,6a-Epoxy-7E-megastigmene-3b,9e-diol 9-glucoside;Dihydroroseoside;7alpha-Thiomethylspironolactone;Ilomastat;Fumigaclavine C;9-(3-Imidazol-1-yl-2,6,6-trimethylcyclohexen-1-yl)-3,7-dimethylnona-2,4,6,8-tetr…	23140	89117.4	144525	73371.4	49214.2	47592.7	82201.7	103179	92939.2	55444.8	27831.7	110443	235968	44748.2	157767	131856	409648	178181	399830	69267.7	186548	56739.6	122778	235753	242814	226956	468497	162313	151024	84265.5	217782	0.3869	down	0.000357882	0.00794021	2.08017	yes
NEG	NEG_715.51_8.0089	715.51	8.0089	CL(16:0/18:0/18:0/18:2(9Z,11Z))	71.64	C79H150O17P2	Lipids and lipid-like molecules	Glycerophospholipids	NA	NA	NA	DG(18:2n6/0:0/22:5n6);DG(18:2n6/0:0/22:5n3);DG(17:0/22:6(5Z,7Z,10Z,13Z,16Z,19Z)-OH(4)/0:0);DG(22:6(5Z,7Z,10Z,13Z,16Z,19Z)-OH(4)/17:0/0:0);DG(17:0/0:0/22:6(5Z,7Z,10Z,13Z,16Z,19Z)-OH(4));DG(22:6(5Z,7Z,10Z,13Z,16Z,19Z)-OH(4)/0:0/17:0);DG(17:0/22:6(4Z,8Z,10Z,13Z,16Z,19Z)-OH(7)/0:0);DG(22:6(4Z,8Z,10Z,13Z,16Z,19Z)-OH(7)/17:0/0:0);DG(17:0/0:0/22:6(4Z,8Z,10Z,13Z,16Z,19Z)-OH(7));DG(22:6(4Z,8Z,10Z,13Z,16Z,…	1.10972e+07	6.35332e+06	6.10592e+06	7.40298e+06	4.66968e+06	4.97043e+06	5.40834e+06	8.13817e+06	4.26783e+06	6.52682e+06	1.01004e+07	6.11335e+06	4.80606e+06	1.20846e+07	1.35943e+07	1.66105e+07	7.03827e+06	8.76135e+06	5.6463e+06	9.53991e+06	2.0861e+07	9.55415e+06	5.96004e+06	2.31764e+07	1.56139e+07	6.39495e+06	7.65497e+06	1.90014e+07	9.55187e+06	7.00322e+06	1.21005e+07	0.5788	down	0.00529174	0.0517968	1.44295	yes
NEG	NEG_714.505_8.0087	714.505	8.0087	CL(18:0/18:0/18:2(9Z,12Z)/16:1(9Z))	71.41	C79H148O17P2	Lipids and lipid-like molecules	Glycerophospholipids	HMDB0057001	NA	NA	PE(14:0/20:2(11Z,14Z));PE(14:1(9Z)/20:1(11Z));PE(16:0/18:2(9Z,12Z));PE(16:1(9Z)/18:1(11Z));PE(16:1(9Z)/18:1(9Z));PE(18:1(11Z)/16:1(9Z));PE(18:1(9Z)/16:1(9Z));PE(18:2(9Z,12Z)/16:0);PE(20:1(11Z)/14:1(9Z));PE(20:2(11Z,14Z)/14:0);PE-NMe(15:0/18:2(9Z,12Z));PE-NMe(18:2(9Z,12Z)/15:0);PE-NMe2(14:1(9Z)/18:1(9Z));PE-NMe2(14:1(9Z)/18:1(11Z));PE-NMe2(16:1(9Z)/16:1(9Z));PE-NMe2(14:0/18:2(9Z,12Z));PE-NMe2(18:1…	2.24249e+07	2.03645e+07	1.89381e+07	2.77509e+07	1.36086e+07	1.93124e+07	1.76268e+07	2.37154e+07	1.19747e+07	2.06795e+07	2.88883e+07	1.95184e+07	1.35083e+07	6.65807e+07	7.84736e+07	2.21915e+07	2.58636e+07	6.17832e+07	2.07995e+07	3.50388e+07	5.93941e+07	3.69059e+07	2.62723e+07	6.50608e+07	4.79049e+07	4.54613e+07	2.46224e+07	2.70391e+07	3.22037e+07	2.32065e+07	4.12008e+07	0.5633	down	0.00152747	0.0215172	1.64953	yes
NEG	NEG_740.521_8.0426	740.521	8.0426	CL(20:1(11Z)/18:2(9Z,12Z)/18:1(9Z)/18:1(11Z))	73.59	C83H152O17P2	Lipids and lipid-like molecules	Glycerophospholipids	HMDB0010256	NA	NA	PC(15:0/18:3(6Z,9Z,12Z));PC(15:0/18:3(9Z,12Z,15Z));PC(18:3(6Z,9Z,12Z)/15:0);PC(18:3(9Z,12Z,15Z)/15:0);PE(14:1(9Z)/22:2(13Z,16Z));PE(16:0/20:3(5Z,8Z,11Z));PE(16:0/20:3(8Z,11Z,14Z));PE(16:1(9Z)/20:2(11Z,14Z));PE(18:0/18:3(6Z,9Z,12Z));PE(18:0/18:3(9Z,12Z,15Z));PE(18:1(11Z)/18:2(9Z,12Z));PE(18:1(9Z)/18:2(9Z,12Z));PE(18:2(9Z,12Z)/18:1(11Z));PE(18:2(9Z,12Z)/18:1(9Z));PE(18:3(6Z,9Z,12Z)/18:0);PE(18:3(9Z…	1.97579e+07	2.9552e+07	2.17706e+07	2.35132e+07	1.003e+07	1.82292e+07	1.91945e+07	3.02316e+07	1.07977e+07	2.11697e+07	2.01925e+07	1.88795e+07	1.13467e+07	2.97451e+07	3.50178e+07	2.56456e+07	4.07149e+07	2.77133e+07	2.81868e+07	2.04349e+07	3.07097e+07	1.8337e+07	2.9159e+07	3.13655e+07	2.26695e+07	2.59643e+07	2.29717e+07	2.82912e+07	2.39854e+07	2.0315e+07	2.76558e+07	0.7346	down	0.00561403	0.0542617	1.13747	yes
NEG	NEG_297.152_9.3267	297.152	9.3267	CP-409092	85	C17H19N3O2	Benzenoids	Benzene and substituted derivatives	NA	NA	NA	Gravelliferone;5-Hydroxy-7-(4-hydroxyphenyl)-1-phenyl-3-heptanone;Auraptene;4-(3-Hydroxy-7-phenyl-6-heptenyl)-1,2-benzenediol;7-(3,7-Dimethylocta-2,6-dienoxy)-1-benzopyran-2-one;Doisynoestrol	1.86842e+07	6.85672e+06	2.65555e+07	3.96835e+06	3.51918e+07	2.96036e+07	1.82426e+07	1.13602e+07	2.46856e+06	3.08557e+07	2.76025e+07	5.19539e+06	1.28376e+07	1.33883e+07	2.58762e+07	2.60929e+07	3.07984e+07	8.36731e+06	2.34645e+07	2.71217e+07	8.28205e+06	2.85221e+07	2.73954e+07	2.38597e+07	3.1054e+07	2.72786e+07	2.6767e+07	2.53252e+07	2.0822e+07	1.73437e+07	2.43004e+07	0.7137	down	0.0471446	0.22383	1.29709	yes
POS	POS_341.11_4.1193	341.11	4.1193	CP-863187	80.62	C18H14F2N4O	Organoheterocyclic compounds	Azoles	NA	NA	NA	Propylthiouracil;1Propylthiouracil;n-propylthiouracil;3'-Ketolactose;2-O-(4-O-Methyl-a-D-glucopyranuronosyl)-D-xylose;4-O-(4-O-Methyl-alpha-D-glucopyranuronosyl)-L-arabinose;3-O-(4-O-Methyl-a-D-glucopyranuronosyl)-L-arabinose;4-O-beta-D-Glucopyranuronosyl-L-fucose;2-O-a-D-Galactopyranuronosyl-L-rhamnose;N-(6-Aminohexyl)-5-chloro-1-naphthalenesulfonamide;fluvoxamino acid	68452.3	190108	300502	192010	123866	33584.6	92706.1	142498	231220	76707.2	46472.1	238091	253846	141221	259525	168575	584209	284396	373140	166613	225198	130915	163133	265344	176025	225763	380097	219051	205474	152235	258713	0.5884	down	0.00675217	0.0615229	1.49511	yes
NEG	NEG_469.284_7.0228	469.284	7.0228	Ceanothine C	78.05	C26H38N4O4	Organic acids and derivatives	Carboxylic acids and derivatives	HMDB0029340	NA	NA	Ceanothine C;DG(2:0/PGF2alpha/0:0);DG(PGF2alpha/2:0/0:0);DG(2:0/0:0/PGF2alpha);DG(PGF2alpha/0:0/2:0);DG(2:0/PGE1/0:0);DG(PGE1/2:0/0:0);DG(2:0/0:0/PGE1);DG(PGE1/0:0/2:0);DG(2:0/PGD1/0:0);DG(PGD1/2:0/0:0);DG(2:0/0:0/PGD1);DG(PGD1/0:0/2:0);beta-Citraurol;3b,4b,7a,12a-Tetrahydroxy-5b-cholanoic acid;2b,3a,7a,12a-Tetrahydroxy-5b-cholanoic acid;3a,7a,12a,19-Tetrahydroxy-5b-cholanoic acid;3a,6b,7b,12a-Te…	1.67478e+06	2.87554e+06	383219	5.90736e+06	1.13797e+06	550588	501226	272011	1.26159e+06	582852	388053	270843	400105	1.96981e+06	329897	259811	626002	212479	325420	403253	279523	339716	321836	278880	376798	311575	304173	389207	819090	1.29828e+06	339898	3.8196	up	0.0035678	0.039039	1.91375	yes
NEG	NEG_560.476_8.4494	560.476	8.4494	Cer 15:3;2O/20:1;(2OH)	70.53	C35H63NO4	Lipids and lipid-like molecules	Sphingolipids	NA	NA	NA	NA	1.70374e+07	2.10922e+07	6.82822e+07	4.84348e+07	4.13121e+07	1.60806e+08	3.06396e+07	7.26192e+07	7.81071e+07	3.78368e+07	1.68198e+07	1.41426e+08	1.46683e+07	9.86636e+06	1.52766e+08	8.01637e+07	1.13389e+08	1.00018e+08	1.23431e+08	1.07381e+08	7.50788e+07	6.68756e+07	9.73995e+07	2.24558e+08	1.27419e+08	1.14624e+08	2.52019e+08	7.72541e+07	8.82616e+07	5.42106e+07	1.22313e+08	0.4432	down	0.000475364	0.00958794	2.30365	yes
NEG	NEG_484.445_7.4197	484.445	7.4197	Cer 17:0;2O/12:0;(2OH)	71.48	C29H59NO4	Lipids and lipid-like molecules	Sphingolipids	NA	NA	NA	NA	679704	732115	851860	1.50852e+06	558243	5.46299e+06	1.28057e+06	1.3019e+06	1.98867e+06	1.07015e+06	1.29745e+06	2.16758e+06	699429	1.02053e+06	1.46068e+06	1.33626e+06	2.08426e+06	1.65873e+06	2.47162e+06	1.10908e+06	1.90962e+06	1.18415e+06	1.48354e+06	3.45131e+06	2.60455e+06	1.56435e+06	3.03069e+06	2.03502e+06	1.71441e+06	1.47284e+06	1.95599e+06	0.753	down	0.0306694	0.174629	1.28997	yes
NEG	NEG_562.484_8.4485	562.484	8.4485	Cer(d17:1/18:1(12Z)-O(9S,10R))	70.86	C35H65NO4	Lipids and lipid-like molecules	Sphingolipids	NA	NA	NA	Cer(d17:1/18:1(12Z)-O(9S,10R));Cer(d17:1/18:1(9Z)-O(12,13))	321079	846575	4.83099e+06	1.86127e+06	1.27251e+06	6.19954e+06	1.26559e+06	1.78065e+06	2.49541e+06	2.82628e+06	1.65703e+06	4.49986e+06	1.23851e+06	1.19254e+06	4.79259e+06	2.50653e+06	3.50988e+06	3.76328e+06	3.96309e+06	4.23942e+06	1.79382e+06	2.86388e+06	3.48337e+06	8.5084e+06	4.20978e+06	3.74958e+06	8.5704e+06	2.88084e+06	3.25438e+06	2.30627e+06	4.20249e+06	0.5488	down	0.00382433	0.0409406	1.79297	yes
NEG	NEG_471.241_5.0623	471.241	5.0623	Chenodeoxycholic acid 3-sulfate	96.6	C24H40O7S	Lipids and lipid-like molecules	Steroids and steroid derivatives	HMDB0002586	NA	NA	Chenodeoxycholic acid sulfate;Chenodeoxycholic acid 3-sulfate;Ursodeoxycholic acid 3-sulfate;Lucidenic acid K;Methylprednisolone aceponate;3-Ketopetromyzonol sulfate;(R)-1-O-[b-D-Apiofuranosyl-(1-&gt;2)-b-D-glucopyranoside]-1,3-octanediol;Oxatomide;Austalide K;Lanabecestat	417161	290000	506497	2.27364e+06	633342	121125	157017	2.03449e+06	458460	197873	354261	485318	1.16177e+06	161099	819106	2.44816e+06	1.16312e+06	189443	1.55206e+06	1.64334e+06	3.06219e+06	167183	1.19078e+06	4.34114e+06	795680	2.56228e+06	736923	456081	1.08498e+06	660861	1.50911e+06	0.4379	down	0.0211722	0.137192	1.63605	yes
NEG	NEG_498.29_5.0563	498.29	5.0563	Chenodeoxycholyltaurine	87.32	C26H45NO6S	Lipids and lipid-like molecules	Steroids and steroid derivatives	HMDB0000951	C05465	map00120(Primary bile acid biosynthesis);map00121(Secondary bile acid biosynthesis);map04976(Bile secretion);map04979(Cholesterol metabolism)	Tauroursodeoxycholic acid;Taurodeoxycholic acid;Chenodeoxycholyltaurine;Beloranib;Sambutoxin	3.58881e+06	2.60629e+06	3.75859e+06	1.81549e+07	518644	7.82502e+06	3.33805e+06	2.80201e+06	1.72877e+06	6.76669e+06	2.56975e+06	2.50364e+06	1.9902e+07	2.41113e+06	1.03575e+06	1.82499e+06	1.01393e+06	896328	888815	655022	1.54809e+06	1.35755e+06	374234	862862	598958	842224	3.43703e+06	1.18005e+06	3.3925e+06	5.6053e+06	1.1797e+06	4.7515	up	0.000227748	0.00583035	2.46113	yes
NEG	NEG_253.041_3.9772	253.041	3.9772	Chrysin	97	C15H10O4	Phenylpropanoids and polyketides	Flavonoids	HMDB0036619	C10028	map00941(Flavonoid biosynthesis)	Cysteinyl-Proline;Prolyl-Cysteine;(S)-3-[(Cyanophenylmethyl)amino]-3-oxopropanoic acid;(+)-1-Methylpropyl 3-(methylthio)-2-propenyl disulfide;3-Methyl-5-pentyl-1,2,4-trithiolane;3-Sulfopropyl methacrylate;Methyl 1-(1-propenylthio)propyl disulfide;(-)-1-(Methylthio)propyl 1-propenyl disulfide	148626	53774.2	14792.9	84788	58935.4	31109.7	95282.4	41838.7	70158.4	1.18934e+06	25723.7	116972	14577.2	51964.2	22339.1	45374.6	28827.1	52993.5	183682	33919.4	4160.92	3179.41	31257.3	12735.9	34036.6	18421.8	12557	45229	90235.6	142706	37765.3	3.7788	up	0.0242097	0.149758	1.76514	yes
NEG	NEG_359.081_4.6295	359.081	4.6295	Chrysosplenol	70.22	C18H16O8	Phenylpropanoids and polyketides	Flavonoids	NA	NA	NA	Acetohexamide;(4-Acetamidophenyl) (2S)-2-acetamido-4-methylsulfanylbutanoate;3-((4-(5-(Hydroxymethyl)-2-oxo-3-oxazolidinyl)phenoxy)methyl)benzonitrile;N-(6-Cyano-3-hydroxy-2,2-dimethyl-3,4-dihydrochromen-4-yl)-N-methylethanesulfonamide;N-(N-Formyl-L-methionyl)-L-phenylalanine;Sulfaphenazole;Temazepam;Clobazam;beta-D-3-Ribofuranosyluric acid;Sulfaquinoxaline;N-(3-Methyl-2-pyridyl)-3-(4-chloropheny…	459713	337436	248838	287297	473777	327221	378310	302916	573381	189484	518248	360781	207430	335229	223795	144776	213822	349305	457695	122531	413251	108487	343444	170932	378615	289576	202215	294480	311178	357147	265209	1.3467	up	0.0334504	0.184005	1.0641	yes
POS	POS_263.16_1.2749	263.16	1.2749	Cibenzoline	96.73	C18H18N2	Benzenoids	Benzene and substituted derivatives	NA	NA	NA	NA	669511	579786	278977	758529	303685	712255	862503	173837	215659	865144	816673	866903	41846.8	44019.1	57674.4	63912.3	31497.4	36112.5	95172.7	85328.5	33342.6	67298.7	116275	104535	40126.5	51564.8	95192.2	138437	293064	513523	72604.9	7.0728	up	3.01968e-05	0.00125228	3.10975	yes
NEG	NEG_307.264_9.2371	307.264	9.2371	Cis-11,14-Eicosadienoic acid	96.95	C20H36O2	NA	NA	NA	NA	NA	Eicosadienoic acid;Sclareol;8Z,11Z-eicosadienoic acid;11,14-Eicosadienoic acid;Eicosadienic acid;Ethyl linoleate;Methyl sterculate;Icosa-2,6-dienoic acid;Ethyl (Z,Z)-9,12-octadecadienoate;alpha-Terpineol;Eucalyptol;Geraniol;2-Decenal;3-Decen-2-one;2,6-Dimethyl-7-octen-3-one;Thujyl alcohol;9-Decenal;Fenchol;(-)-Carvomenthone;Isomenthone;(-)-Borneol;(-)-Menthone;p-Menthan-2-one;(+)-Menthone;(+)-Iso…	3.93563e+07	3.3326e+07	6.55183e+07	4.01367e+07	5.32838e+07	1.74057e+08	3.49726e+07	5.44143e+07	1.10049e+08	2.73311e+07	2.21478e+07	1.6698e+08	3.02038e+07	2.40545e+07	1.49884e+08	7.44531e+07	1.13759e+08	9.78832e+07	1.20666e+08	1.0154e+08	8.59111e+07	7.10107e+07	9.68008e+07	2.06852e+08	1.78687e+08	1.24055e+08	1.79799e+08	9.67511e+07	9.19244e+07	6.25593e+07	1.21289e+08	0.5158	down	0.000462562	0.00942726	2.03209	yes
NEG	NEG_197.154_6.9975	197.154	6.9975	Citronellyl acetate	75.56	C12H22O2	Lipids and lipid-like molecules	Fatty Acyls	HMDB0034844	NA	NA	trans-Dodec-2-enoic acid;Methyl 10-undecenoate;Allyl nonanoate;xi-Dihydro-5-octyl-2(3H)-furanone;cis-4-Decenyl acetate;2,6-Dimethyl-5-heptenal propyleneglycol acetal;11-Dodecenoic acid;cis-3-Hexenyl hexanoate;(&#177;)-Citronellyl acetate;5,5-Dibutyl-4,5-dihydro-2(3H)furanone;Rhodinyl acetate;Methyl 9-undecenoate;Ethyl 2-decenoate;1-Ethenylhexyl butanoate;xi-5-Dodecanolide;3-Heptyldihydro-5-methyl…	1.1181e+07	7.20078e+06	1.71999e+07	7.81849e+06	7.20465e+06	5.02792e+07	8.04115e+06	7.46742e+06	5.24902e+07	8.50084e+06	6.46424e+06	8.03809e+07	4.02055e+06	3.44694e+06	1.03468e+08	2.96513e+07	9.12419e+07	3.14364e+07	4.48802e+07	3.17289e+07	2.9605e+07	3.52765e+07	3.43417e+07	5.86136e+07	9.09741e+07	3.90414e+07	1.08402e+08	3.74276e+07	3.70637e+07	1.94069e+07	5.47206e+07	0.3547	down	9.48015e-05	0.00305569	2.68823	yes
POS	POS_240.086_3.3905	240.086	3.3905	Clomazone	75.54	C12H14ClNO2	Benzenoids	Benzene and substituted derivatives	NA	NA	NA	1,4-Bisdesoxycyadox;(3s)-3-(Benzyloxy)-L-Aspartic Acid;hydroxytyrosyl acetate;1-Isothiocyanato-8-(methylthio)octane;3-[(2-Oxoacetyl)oxy]-4-(trimethylazaniumyl)butanoate;Pymetrozine;Isofraxidin;N-Chlorothylnitrosourea sarcosinamide;Sarcnu;Acetyl 2-acetyloxybenzoate;p-Coumaroyl glycolic acid;2-succinylbenzoate	120197	1.26475e+06	1.31741e+06	453568	4736.09	157581	4445.19	408072	11309.6	1.13228e+06	135181	62534	41395.7	116107	610048	97425.5	137240	3683.37	22311.4	6485.25	27444.9	4357.21	30376.1	24109.6	5179.46	2218.06	79791.8	132194	229016	373541	84490.4	4.4211	up	0.0361669	0.191805	2.07794	yes
POS	POS_267.058_1.3682	267.058	1.3682	Cotoin	78.4	C14H12O4	Benzenoids	Benzene and substituted derivatives	NA	NA	NA	S-(-)-ureidoglycolate;5-(Hexahydro-2-oxo-1H-thieno[3,4-D]imidazol-6-YL)pentanal;Benz[a]anthracene;Chrysene;Thiobutabarbital;Uridine;Pseudouridine;1-[(2R,3S,5R)-3,4-Dihydroxy-5-(hydroxymethyl)oxolan-2-yl]pyrimidine-2,4-dione;1-[(2R,3R,4S,5R)-3,4-Dihydroxy-5-(hydroxymethyl)oxolan-2-yl]oxypyrimidin-2-one;Saclofen	1.14633e+06	4.35174e+06	4.15192e+06	1.87912e+06	5.84925e+06	1.98367e+06	2.19008e+06	4.1564e+06	1.435e+06	2.25232e+06	1.8417e+06	2.65451e+06	1.76227e+06	1.45087e+06	4.53079e+06	6.20842e+06	5.32308e+06	7.95384e+06	7.48801e+06	6.4417e+06	2.11029e+06	7.37901e+06	7.67569e+06	7.46557e+06	6.49405e+06	6.59509e+06	6.34934e+06	3.03751e+06	4.36277e+06	2.65037e+06	6.07517e+06	0.4363	down	1.55909e-05	0.000813907	2.13068	yes
POS	POS_319.128_4.4743	319.128	4.4743	Cryptotanshinone	74.35	C19H20O3	Lipids and lipid-like molecules	Prenol lipids	HMDB0035220	NA	NA	fluvoxamino acid;Prehumulinic acid;6b-Hydroxy-8a-methoxy-7(11)-eremophilen-12,8-olide;3b-Hydroxy-6b-methoxy-7(11)-eremophilen-12,8a-olide;Methyl (3b,11x)-3-Hydroxy-8-oxo-6-eremophilen-12-oate;(1R,7S,13S,15S)-2,15-Dihydroxy-7-methyl-6-oxabicyclo[11.3.0]hexadeca-3,11-dien-5-one;5-[(4-Hydroxypheny)ethenyl]-2-(3-methyl-1-butenyl)-1,3-benzenediol;Parakmerin A;Cryptotanshinone;(E)-Arachidin II;exo-Dehy…	86067.8	336131	619509	284640	242330	244204	311309	184754	284151	142490	97197.5	447107	897132	305254	515837	319009	1.67807e+06	541304	2.00331e+06	379377	423499	272783	333382	1.14199e+06	762539	773415	2.0474e+06	883282	591338	320163	862513	0.3712	down	0.000818102	0.0139046	2.00676	yes
NEG	NEG_149.045_0.7423	149.045	0.7423	D-Arabinose	75.27	C5H10O5	Organic oxygen compounds	Organooxygen compounds	HMDB0029942	NA	NA	D-Xylose;D-Ribose;2-Deoxyribonic acid;Arabinofuranose;Diisopropyl disulfide;D-Apiose;Methyl pentyl disulfide;Dipropyl disulfide;1,6-Hexanedithiol;Butyl ethyl disulfide;Methyl isopentyl disulfide;xi-1-(Propylthio)-1-propanethiol;2-Deoxypentonic acid;(2R,3R,4R)-2,3,4,5-Tetrahydroxypentanal;alpha-D-Arabinofuranose;D-Arabinopyranose;D-Threo-3-Pentulose;Isopropyl propyl disulfide;alpha-L-arabinofurano…	5.05004e+06	4.11668e+06	3.65907e+06	3.21637e+06	3.9115e+06	3.48314e+06	4.91449e+06	3.26278e+06	3.46538e+06	5.08782e+06	4.83254e+06	3.42326e+06	3.26245e+06	3.58259e+06	3.01028e+06	2.51368e+06	2.27219e+06	3.21722e+06	2.85343e+06	2.61225e+06	3.24228e+06	2.956e+06	2.92787e+06	3.00224e+06	2.56139e+06	2.55602e+06	2.97097e+06	2.77259e+06	3.38345e+06	3.94772e+06	2.81917e+06	1.4003	up	5.28729e-06	0.000371011	1.32799	yes
POS	POS_203.052_1.6369	203.052	1.6369	D-Glucose	81.23	C6H12O6	Organic oxygen compounds	Organooxygen compounds	HMDB0000122	C00221	map00010(Glycolysis / Gluconeogenesis);map00030(Pentose phosphate pathway);map01100(Metabolic pathways);map01110(Biosynthesis of secondary metabolites);map01120(Microbial metabolism in diverse environments);map01200(Carbon metabolism)	D-Glucose;D-Galactose;D-Mannose;myo-Inositol;3-Deoxyarabinohexonic acid;D-Fructose;Allose;L-Sorbose;Paraxanthine;Theophylline;Theobromine;alpha-D-Glucose;D-Tagatose;beta-D-Galactose;scyllo-Inositol;L-Gulose;Dihydroxyacetone (dimer);L-Galactose;Levoinositol;muco-Inositol;Glycoprotein-phospho-D-mannose;epi-Inositol;neo-Inositol;D-chiro-Inositol;cis-Inositol;allo-Inositol;(2R,3R,4R,5R)-2,3,4,5,6-Pen…	2.064e+07	1.42686e+07	1.24048e+07	1.42505e+07	1.30872e+07	1.3144e+07	2.0717e+07	1.31464e+07	1.39382e+07	2.19065e+07	1.65943e+07	1.62362e+07	1.06228e+07	1.45031e+07	1.20183e+07	1.12654e+07	1.06624e+07	1.29402e+07	1.18706e+07	9.48992e+06	1.37156e+07	1.32723e+07	1.32098e+07	1.3527e+07	1.04708e+07	1.15817e+07	1.02634e+07	1.2366e+07	1.36469e+07	1.539e+07	1.19038e+07	1.2929	up	0.00129313	0.0191694	1.00824	yes
NEG	NEG_433.207_4.2294	433.207	4.2294	DAUDA	97	C23H34N2O4S	NA	NA	NA	NA	NA	Flunisolide;4,5-Dihydro-drospirenone-3-sulfate;Dexamethasone acetate;p-MPPF;Kenalog;Nasalide;Paramethasone acetate;Alanylglutamine;Alanyl-Gamma-glutamate;Glutaminylalanine;2-(2-Aminopropanylamino)-4-carbamoylbutyric acid;5a,6a-Epoxy-7E-megastigmene-3a,9e-diol 3-glucoside;9,13-Dihydroxy-4-megastigmen-3-one 9-glucoside;Icariside B8;5a,6a-Epoxy-7E-megastigmene-3b,9e-diol 9-glucoside;Dihydroroseoside…	464026	403662	23002.5	1.23686e+06	138878	219489	391744	1.17394e+06	6558.59	928556	150041	29553.1	246997	36840.4	5059.16	15091	2572.9	14507.5	307627	1735.57	35151.4	1956.98	9895.68	13158.6	137279	11955	5836.82	15969.9	215284	389296	41271.2	9.4326	up	0.000126545	0.00381988	3.55113	yes
NEG	NEG_575.467_8.9323	575.467	8.9323	DG(15:0/0:0/18:3n3)	70.08	C36H64O5	Lipids and lipid-like molecules	Fatty Acyls	NA	NA	NA	DG(15:0/18:3(6Z,9Z,12Z)/0:0);DG(15:0/18:3(9Z,12Z,15Z)/0:0);DG(18:3(6Z,9Z,12Z)/15:0/0:0);DG(18:3(9Z,12Z,15Z)/15:0/0:0);DG(15:0/0:0/18:3n6);DG(15:0/0:0/18:3n3);DG(14:1n5/0:0/18:2n6);Sabadelin;Epoxymurin A;Epoxymurin B;Epomuricenin B	3.59096e+07	7.53484e+07	4.69871e+07	1.95876e+07	2.37749e+07	3.0835e+07	5.56087e+07	2.5456e+07	1.70747e+07	9.95288e+07	1.77779e+07	2.12778e+07	3.1149e+07	3.71904e+07	2.08567e+07	2.69212e+07	1.21697e+07	1.58181e+07	2.06869e+07	2.78353e+07	2.76425e+07	3.08981e+07	2.77166e+07	1.70921e+07	2.45735e+07	2.20766e+07	1.77054e+07	2.44598e+07	3.04985e+07	3.83933e+07	2.26037e+07	1.6985	up	0.0187214	0.126379	1.15563	yes
POS	POS_577.517_8.1894	577.517	8.1894	DG(16:0/18:1(9Z)/0:0)	86.67	C37H70O5	Lipids and lipid-like molecules	Glycerolipids	HMDB0007102	C13861	NA	Tedisamil;Cohibin C;Cohibin D	5.07243e+06	738853	1.09506e+06	1.26822e+06	1.756e+06	1.82078e+06	1.07006e+06	705699	915234	2.09474e+06	1.33812e+06	1.2231e+06	1.04223e+06	3.12962e+06	629268	582011	643624	598243	526144	580043	1.77432e+06	629398	912183	260245	1.98679e+06	1.28845e+06	1.48994e+06	1.94148e+06	1.32544e+06	1.66215e+06	988724	1.6811	up	0.0237329	0.14777	1.27536	yes
POS	POS_495.287_5.1277	495.287	5.1277	DG(2:0/PGF1alpha/0:0)	79.8	C25H44O8	Lipids and lipid-like molecules	Glycerolipids	NA	NA	NA	3-Hydroxybutyrylcarnitine;(R)-3-hydroxybutyrylcarnitine;1'-O-Acetylpaxilline;(4Z)-7-[(1S,2S,5R)-5-[([1,1'-Biphenyl]-4-yl)methoxy]-2-(morpholin-4-yl)-3-oxocyclopentyl]hept-4-enoic acid;Epothilone C	1.09689e+06	788730	810407	1.59388e+06	289124	928598	817074	451001	470098	806984	980206	289671	1.3366e+06	845729	388230	629457	372413	511976	58251.7	350040	419216	382087	205007	149657	88176.1	167440	172355	135225	554804	821785	287824	2.8552	up	5.66485e-05	0.00208316	2.36044	yes
NEG	NEG_299.249_7.0826	299.249	7.0826	DL-5-hydroxy stearic acid	85.48	C18H36O3	Lipids and lipid-like molecules	Fatty Acyls	HMDB0112180	NA	NA	NA	91445.9	28065.3	35037.2	321773	83607	937529	48322.8	159163	165776	103490	11378.4	229016	10812.6	26740.4	128179	164833	156782	205880	133721	207445	235352	34899.2	145250	557140	320343	356084	677304	140479	204137	160868	247407	0.6502	down	0.0247443	0.151586	1.82115	yes
POS	POS_338.229_5.1988	338.229	5.1988	Decanoylcarnitine	97	C17H33NO4	Lipids and lipid-like molecules	Fatty Acyls	HMDB0000651	NA	NA	Decanoylcarnitine;6-Methylnonanoylcarnitine;5-Methylnonanoylcarnitine;8-Methylnonanoylcarnitine;7-Methylnonanoylcarnitine;4-Methylnonanoylcarnitine;3-Methylnonanoylcarnitine;N-Myristoyl Serine;Arginylphenylalaninamide	335889	489271	600923	218975	321723	1.23167e+06	759774	505730	4.94886e+06	636568	179072	3.2427e+06	94790.1	46124.1	5.29328e+06	1.3847e+06	4.61649e+06	964046	3.34629e+06	2.13187e+06	1.13019e+06	1.44391e+06	668529	1.66809e+06	4.93167e+06	1.6055e+06	1.89855e+06	2.5691e+06	1.68801e+06	972291	2.40373e+06	0.4045	down	0.00102613	0.0161642	2.57961	yes
NEG	NEG_138.056_3.3148	138.056	3.3148	Deferiprone	81.67	C7H9NO2	Organoheterocyclic compounds	Pyridines and derivatives	NA	NA	NA	3,4-Dihydroxybenzylamine;5-Acetyl-2,4-dimethyloxazole;Ethyl 2-pyrrolecarboxylate;3-((Aminooxy)methyl)phenol;3-(1H-Pyrrol-2-yl)propanoic Acid;Deferiprone;Dihydroxybenzylamine;Dimethyl-3-hydroxypyrid-4-one;3-Amino-2,3-dihydrobenzoic acid;Aniline;3-Methylpyridine;2-Methylpyridine;Azepine;4-Methylpyridine;Pyridine	8418.28	7686.65	6637.66	29352.7	56489	14993.6	33820.5	81822	31903.6	59753.4	14148.9	36841.7	18770	28890.1	123338	213707	122251	166177	137641	75183.7	40543.4	90525.9	86600.3	202031	128344	70307.6	113528	133440	76183.8	30680.6	121687	0.2521	down	2.519e-06	0.000219169	2.93349	yes
NEG	NEG_310.21_6.4119	310.21	6.4119	Dimepheptanol	70.35	C21H29NO	Benzenoids	Benzene and substituted derivatives	HMDB0015358	C08012	map00982(Drug metabolism - cytochrome P450)	NA	3.49123e+06	1.81836e+06	1.15887e+06	3.76413e+06	2.52407e+06	1.34957e+06	3.13081e+06	6.14336e+06	1.96856e+06	2.36392e+06	3.3369e+06	935880	2.00935e+06	3.51742e+06	1.81976e+06	1.95541e+06	2.30269e+06	1.2609e+06	2.05852e+06	826213	1.28117e+06	773417	2.83913e+06	1.88259e+06	1.05669e+06	2.39776e+06	2.76002e+06	1.29947e+06	2.21522e+06	2.67946e+06	1.75098e+06	1.5303	up	0.0406821	0.205228	1.02804	yes
NEG	NEG_354.264_9.057	354.264	9.057	Dimethylsphingosine	70.32	C20H37NO4	Organic oxygen compounds	Organooxygen compounds	NA	NA	NA	Tridec-3-enoylcarnitine;Tridec-5-enoylcarnitine;Tridec-8-enoylcarnitine;(11E)-Tridec-11-enoylcarnitine;Tridec-2-enoylcarnitine;Tridec-4-enoylcarnitine;Tridec-6-enoylcarnitine;(9E)-Tridec-9-enoylcarnitine;Tridec-7-enoylcarnitine;Tridec-10-enoylcarnitine;Dimethylsphingosine;Dicyclomine	4.11213e+06	2.19424e+06	7.94427e+06	5.24672e+06	4.45064e+06	2.51455e+07	2.36497e+06	6.447e+06	1.09629e+07	2.63215e+06	1.99431e+06	2.21886e+07	897025	1.33027e+06	2.21131e+07	1.44743e+07	1.39762e+07	1.47896e+07	2.10866e+07	1.4497e+07	1.01689e+07	9.59151e+06	1.15464e+07	2.64465e+07	1.91188e+07	1.49701e+07	3.75221e+07	1.07812e+07	1.21069e+07	6.99362e+06	1.72202e+07	0.4061	down	0.000290814	0.0069889	2.5282	yes
NEG	NEG_187.134_5.1442	187.134	5.1442	Dimethyltryptamine	70.75	C12H16N2	Organoheterocyclic compounds	Indoles and derivatives	HMDB0005973	C08302	NA	3-Hydroxycapric acid;(R)-3-Hydroxydecanoic acid;9-Hydroxydecanoic acid;(1R,2R,4R,8R)-p-Menthane-2,8,9-triol;7-Methyl-3-methylene-1,6,7-octanetriol;cis-p-Menthane-1,7,8-triol;2,6-Dimethyl-7-octene-2,3,6-triol;(1S,2S,4R,8R)-p-Menthane-1,2,9-triol;2-Hexyl-1,3-dioxan-5-ol;2-Hexyl-1,3-dioxolane-4-methanol;(1R,2R,4S)-p-Menthane-1,2,8-triol;xi-5-Hydroxydecanoic acid;Ethyl (&#177;)-3-hydroxyoctanoate;2-H…	3.38086e+06	3.74485e+06	1.20984e+06	6.15387e+06	2.3921e+06	1.67113e+06	3.2818e+06	6.00796e+06	1.63908e+06	3.59569e+06	3.67008e+06	4.79471e+06	1.40538e+06	1.25434e+06	2.02712e+06	3.60108e+06	1.59303e+06	1.40656e+06	2.07389e+06	1.3265e+06	2.48661e+06	1.45891e+06	2.78881e+06	1.89385e+06	1.41842e+06	1.89301e+06	1.8668e+06	1.63482e+06	2.55968e+06	3.15727e+06	1.9621e+06	1.6091	up	0.0390603	0.200451	1.10248	yes
NEG	NEG_389.27_6.6181	389.27	6.6181	Dioctyl phthalate	74.15	C24H38O4	Benzenoids	Benzene and substituted derivatives	NA	NA	NA	12-Ketodeoxycholic acid;7-Hydroxy-3-oxocholanoic acid;Nutriacholic acid;9'-Carboxy-alpha-chromanol;D8'-Merulinic acid A;12alpha-hydroxy-3-oxo-5beta-cholan-24-oic Acid;3beta,7alpha-Dihydroxychol-5-en-24-oic Acid;3alpha-Hydroxy-7-oxo-5beta-cholanic acid;Antroquinonol;Bis(2-ethylhexyl) phthalate;Bis(2-ethylhexyl) terephthalate;Diisooctyl phthalate;Dioctyl phthalate;3,4-Bis(2-ethylhexyl)phthalic acid…	243139	428046	366112	1.41971e+06	2.32776e+06	192639	407861	735364	448016	84377.6	545131	213698	891288	321376	1.2949e+06	1.48465e+06	370017	1.41902e+06	848121	1.04249e+06	3.62004e+06	455289	2.37156e+06	2.60695e+06	864146	1.02224e+06	1.04926e+06	484127	984190	616037	1.35234e+06	0.4555	down	0.00353496	0.0388612	1.93016	yes
NEG	NEG_349.167_4.2146	349.167	4.2146	Disofenin	72.2	C18H26N2O5	Organic acids and derivatives	Carboxylic acids and derivatives	NA	NA	NA	Calonectrin;Millefin;Romergoline;5-((2-(Diethylamino)ethyl)amino)-8-hydroxy-6H-imidazo[4,5,1-de]acridin-6-one;Arctiopicrin;Carthamoside A1;Rhazidigenine Nb-oxide;2-Polyprenyl-3-methyl-5-hydroxy-6-methoxy-1,4-benzoquinone;3-Polyprenyl-4-hydroxy-5-methoxybenzoate;2-Hydroxyestriol;Estetrol;Estetrol&#160;;[6]-Dehydrogingerdione;Diisopentyl thiomalate;Laurenobiolide;Oudemansin A;3-Polyprenyl-4,5-dihyd…	3693.81	16711	708697	1.55702e+06	149959	742563	579267	1.01136e+06	1.0304e+06	298855	612277	2859.16	507049	6774.74	582226	1.1638e+06	884584	4.95571e+06	4.28918e+06	384528	565168	727772	743604	1.60665e+06	389757	1.24552e+06	612171	753427	933271	516249	1.35029e+06	0.3823	down	0.0137211	0.102137	2.44293	yes
NEG	NEG_655.472_8.1445	655.472	8.1445	Docosahexaenoic acid	90.03	C22H32O2	Lipids and lipid-like molecules	Fatty Acyls	HMDB0002183	C06429	map01040(Biosynthesis of unsaturated fatty acids)	PA(P-16:0/18:2(9Z,12Z));DG(15:0/20:3(6,8,11)-OH(5)/0:0);DG(20:3(6,8,11)-OH(5)/15:0/0:0);DG(15:0/0:0/20:3(6,8,11)-OH(5));DG(20:3(6,8,11)-OH(5)/0:0/15:0);DG(17:0/18:2(10E,12Z)+=O(9)/0:0);DG(18:2(10E,12Z)+=O(9)/17:0/0:0);DG(17:0/0:0/18:2(10E,12Z)+=O(9));DG(18:2(10E,12Z)+=O(9)/0:0/17:0);DG(17:0/18:2(9Z,11E)+=O(13)/0:0);DG(18:2(9Z,11E)+=O(13)/17:0/0:0);DG(17:0/0:0/18:2(9Z,11E)+=O(13));DG(18:2(9Z,11E)+…	370198	679345	6.95724e+06	676160	1.69313e+06	7.99668e+06	1.01436e+06	3.9351e+06	2.54035e+06	780798	651903	4.50842e+07	692222	1.30912e+06	8.78306e+06	4.52423e+06	2.74503e+06	2.5467e+06	1.19972e+07	9.67492e+06	5.01666e+06	5.81177e+06	5.38534e+06	2.46422e+07	1.14898e+07	4.92732e+06	1.08084e+07	5.912e+06	6.73734e+06	5.31292e+06	8.16176e+06	0.651	down	0.00288136	0.0336167	2.43587	yes
NEG	NEG_339.327_8.682	339.327	8.682	Docosanoic acid	80.85	C22H44O2	Lipids and lipid-like molecules	Fatty Acyls	HMDB0000944	C08281	map00073(Cutin, suberine and wax biosynthesis);map01040(Biosynthesis of unsaturated fatty acids)	6-Hydroxy-8-docosanone;8-Hydroxy-6-docosanone;5-Hydroxy-7-docosanone;4-Hydroxy-6-docosanone;Butyl octadecanoate;Isobehenic acid;Undecanal;6-Undecanone;10-Undecen-1-ol;(Z)-3-Methyl-3-decen-1-ol;(&#177;)-(E)-3-Methyl-4-decen-1-ol;1-Menthyl methyl ether;trans- and cis-1-Methoxy-1-decene;2-Undecanone;2-Undecen-1-ol;2,8-Dimethylnonan-5-one;8-Isoprostane;10-Eicosene;1-Phytene;Prostane	1.38684e+07	7.59874e+06	1.02356e+07	3.4118e+07	1.56348e+07	1.51889e+07	1.38098e+07	1.55883e+07	1.31082e+07	1.7315e+07	1.75163e+07	1.27933e+07	1.15063e+07	1.02961e+07	6.53532e+06	1.76049e+07	8.53872e+06	8.92233e+06	1.1025e+07	1.5447e+07	8.99664e+06	1.3398e+07	1.22396e+07	8.51365e+06	7.2534e+06	6.34368e+06	1.05639e+07	1.19154e+07	1.27098e+07	1.48984e+07	1.05213e+07	1.416	up	0.0124932	0.0954705	1.04729	yes
NEG	NEG_331.264_8.8641	331.264	8.8641	Docosatetraenoic acid	96.18	C22H36O2	Lipids and lipid-like molecules	Fatty Acyls	NA	NA	NA	Adrenic acid;1-Hydroxy-1-phenyl-3-hexadecanone;3-Hydroxy-1-phenyl-1-hexadecanone;2-Methyl-5-(8-pentadecenyl)-1,3-benzenediol;Ethyl Arachidonate;Docosa-2,4,6,8-tetraenoic acid;Ganaxolone;Ethyl icosa-6,9,12,15-tetraenoate;(-)-Nopol;Limonene aldehyde;2,4-Undecadienal;Dihydrojasmone;2-Hexylidenecyclopentanone;2,6,6-Trimethyl-1-cyclohexen-1-acetaldehyde;2,5-Undecadienal;2-Heptylfuran;Norecasantalol;My…	1.64049e+07	2.02783e+07	5.10515e+07	1.87928e+07	2.35902e+07	1.09593e+08	2.83887e+07	2.91507e+07	7.83818e+07	1.88762e+07	1.6919e+07	1.30824e+08	2.0586e+07	1.46349e+07	7.65905e+07	3.19793e+07	4.95455e+07	5.75599e+07	5.39307e+07	5.10735e+07	4.08201e+07	3.56527e+07	3.61717e+07	1.09721e+08	8.508e+07	4.31557e+07	8.91531e+07	3.65351e+07	4.90872e+07	4.1248e+07	5.69263e+07	0.7246	down	0.024539	0.150922	1.53788	yes
NEG	NEG_333.279_9.4618	333.279	9.4618	Docosatrienoic Acid	97	C22H38O2	Lipids and lipid-like molecules	Fatty Acyls	HMDB0002823	NA	NA	Docosatrienoic acid;(all-Z)-7,10,13-Docosatrienoic acid;13,16,19-Docosatrienoic acid;Pentadecylbenzene;5alpha-Pregnane;Digeranyl;Isodigeranyl;ent-kaurane;Geran-8-YL geran;3,7,11,15-Tetramethylhexadeca-1,6,10,14-tetraene;Icosa-5,8,11,14-tetraene	3.89783e+06	1.89045e+06	2.32217e+06	2.29693e+06	2.67754e+06	5.55406e+06	2.34277e+06	2.2001e+06	3.14366e+06	1.1819e+06	1.58692e+06	4.28614e+06	1.58783e+06	1.36794e+06	2.84528e+06	3.10947e+06	3.03999e+06	4.97316e+06	4.09892e+06	5.25675e+06	2.99543e+06	2.76951e+06	4.31447e+06	7.42284e+06	7.15275e+06	4.75301e+06	6.33361e+06	3.63444e+06	3.537e+06	2.59544e+06	4.47855e+06	0.5795	down	0.000670842	0.0121165	1.5986	yes
NEG	NEG_425.258_6.9709	425.258	6.9709	Dual-release hydrocortisone	79.92	C22H38N2O4S	Benzenoids	Benzene and substituted derivatives	NA	NA	NA	Prostaglandin PGE2 1-glyceryl ester;Prostaglandin PGE2 glyceryl ester;Prostaglandin D2-1-glyceryl ester;Prostaglandin H2 2-glyceryl Ester;MG(PGE2/0:0/0:0);MG(PGD2/0:0/0:0);MG(20:4(7E,9E,11Z,13E)-3OH(5S,6R,15S)/0:0/0:0);MG(0:0/PGE2/0:0);MG(0:0/PGD2/0:0);MG(0:0/20:4(7E,9E,11Z,13E)-3OH(5S,6R,15S)/0:0);1-Phenyl-2-decanoylamino-3-morpholino-1-propanol;Bisnorcholic acid;16,16-Dimethylprostaglandin E2;2…	4.7768e+06	1.23311e+06	1.23313e+06	1.49941e+06	3.49275e+06	1.63323e+06	1.86217e+06	1.38871e+06	3.87212e+06	1.7794e+06	1.51592e+06	1.16777e+06	1.60375e+06	951982	1.29635e+06	1.03781e+06	1.34534e+06	892560	765101	1.38486e+06	1.03477e+06	1.24451e+06	1.21628e+06	951911	1.35161e+06	1.03517e+06	1.10235e+06	1.28602e+06	1.56982e+06	2.00073e+06	1.1389e+06	1.7567	up	0.00414634	0.0435644	1.32528	yes
POS	POS_276.126_3.8488	276.126	3.8488	Dubinidine	73.55	C15H17NO4	Organoheterocyclic compounds	Quinolines and derivatives	NA	NA	NA	NA	316291	225745	309430	320699	366500	212682	499938	516533	806368	343993	350875	310650	597452	513671	358093	140387	130954	214187	344649	525335	163216	351732	98791.1	190393	278888	332955	543793	250037	343366	406488	280244	1.4505	up	0.0203069	0.133608	1.15838	yes
POS	POS_289.216_5.9404	289.216	5.9404	Epitestosterone	76.27	C19H28O2	Lipids and lipid-like molecules	Steroids and steroid derivatives	HMDB0000628	C00535	map00140(Steroid hormone biosynthesis);map00984(Steroid degradation);map01100(Metabolic pathways);map01120(Microbial metabolism in diverse environments);map01522(Endocrine resistance);map04913(Ovarian steroidogenesis);map04929(GnRH secretion);map05200(Pathways in cancer);map05215(Prostate cancer);map07226(Progesterone, androgen and estrogen receptor agonists/antagonists)	Testosterone;Epitestosterone;Androstanedione;Etiocholanedione;Dehydroandrosterone;alpha-Amylcinnamyl isovalerate;Testosterone-d3;5alpha-Androstane-3,17-dione;7A-Methyl-19-nortestosterone;Normethandrone;(8R,9S,10R,13S,14S,17S)-17-Hydroxy-11,13-dimethyl-2,6,7,8,9,10,11,12,14,15,16,17-dodecahydro-1H-cyclopenta[a]phenanthren-3-one;(8S,9R,10S,13S,14S)-10,13-Dimethyl-2,3,4,5,6,7,8,9,12,14,15,16-dodecah…	22832.6	506204	22415.7	32838.6	452692	6079.11	217209	573203	276358	6895.46	370781	585052	565549	775268	7684.36	538695	25409.2	301210	27479.5	7981.63	41974.7	40533.9	12449.7	13087.3	15749.1	12988.6	97141.7	48447	200150	315241	85059.4	3.7061	up	0.0263575	0.157002	2.07536	yes
POS	POS_166.122_5.3723	166.122	5.3723	Estragole	70.62	C10H12O	Benzenoids	Phenol ethers	HMDB0034121	C10452	map00940(Phenylpropanoid biosynthesis);map01110(Biosynthesis of secondary metabolites)	Pseudoephedrine;Hordenine;Ephedrine;Perilla sugar;Nepetalactam;5-Ethyl-1,2,3,4,5,6-hexahydro-7H-cyclopenta[b]pyridin-7-one;6-Ethyl-1,2,3,4,5,6-hexahydro-7H-cyclopenta[b]pyridin-7-one;3-Methyl-2-(1-pyrrolidinyl)-2-cyclopenten-1-one;5-Methyl-2-(1-pyrrolidinyl)-2-cyclopenten-1-one;2,3,4,5,6,7-Hexahydro-7-methylcyclopent[b]azepin-8(1H)-one;2-(5-Methyl-2-furanyl)piperidine;1-[(5-Methyl-2-furanyl)methy…	138571	179207	142075	188868	213882	235937	115174	125694	203825	428217	338972	80282.8	89064.1	108121	66904.1	106606	99283.3	114960	83994.5	110458	94354.9	124903	81963	101674	107196	107512	85106.4	92398.6	141614	184849	98379.5	1.8789	up	0.00131335	0.0193185	1.50393	yes
NEG	NEG_196.142_6.5812	196.142	6.5812	Estreptoquinasa	75.27	C11H19NO2	Organic acids and derivatives	Carboxylic acids and derivatives	NA	NA	NA	NA	242666	845739	1.21585e+06	611989	707172	2.89855e+06	1.3101e+06	1.14987e+06	2.3159e+06	1.61432e+06	626889	2.94522e+06	399701	256624	3.40734e+06	1.8613e+06	3.87277e+06	2.26317e+06	2.11069e+06	1.82183e+06	1.95563e+06	2.22782e+06	2.35454e+06	3.62533e+06	2.78635e+06	2.09863e+06	3.20281e+06	1.96615e+06	1.88196e+06	1.22433e+06	2.5396e+06	0.4821	down	0.000594283	0.0112055	2.20013	yes
NEG	NEG_103.04_1.2209	103.04	1.2209	Ethoxyacetic acid	73.79	C4H8O3	Organic acids and derivatives	Carboxylic acids and derivatives	HMDB0031212	NA	NA	2-Hydroxybutyric acid;3-Hydroxybutyric acid;(R)-3-Hydroxyisobutyric acid;(S)-3-Hydroxybutyric acid;4-Hydroxybutyric acid;alpha-Hydroxyisobutyric acid;Ethoxyacetic acid;2-Methyl-3-hydroxypropanoate;(1,2-Dihydroxyethyl)oxirane;Methyl lactate;Acetone;Propanal;Methyloxirane;Allyl alcohol;(E)-1-Propenol;Methyl vinyl ether;Acetaldehyde;Polyvinyl alcohol;Ethylene oxide	2.31787e+07	1.49554e+07	3.51132e+07	3.38445e+07	2.43446e+07	9.35047e+07	2.0916e+07	3.78737e+07	3.61307e+07	1.71814e+07	1.70684e+07	4.12475e+07	1.49787e+07	1.21693e+07	6.48065e+07	4.45779e+07	5.15699e+07	3.82253e+07	2.37618e+08	3.34012e+07	5.2381e+07	2.55642e+07	2.77781e+07	2.68885e+08	5.11679e+07	5.43102e+07	1.36616e+08	1.72864e+08	6.00812e+07	3.01791e+07	8.99832e+07	0.3354	down	0.00117541	0.0178824	2.03772	yes
NEG	NEG_227.201_8.135	227.201	8.135	Ethyl dodecanoate	96.78	C14H28O2	Lipids and lipid-like molecules	Fatty Acyls	HMDB0033788	NA	NA	Myristic acid;2,6,10-Trimethylundecanoic acid;12-Methyltridecanoic acid;Hexanal octane-1,3-diol acetal;Undecanal propyleneglycol acetal;Ethyl dodecanoate;Heptyl heptanoate;Hexyl octanoate;Decyl butanoate;3-Methylbutyl nonanoate;Nonyl isovalerate;Dodecyl acetate;Isobutyl decanoate;10-Methyltridecanoic acid;butyl decanoate;2-Heptanone;4-Heptanone;Ethyl isobutyl ketone;(Z)-4-Hepten-1-ol;2,4-Dimethyl…	5.10985e+08	3.62304e+08	5.372e+08	3.52504e+08	5.3076e+08	1.18242e+09	4.05482e+08	4.62774e+08	8.04248e+08	4.37602e+08	3.7908e+08	8.20431e+08	4.35422e+08	4.04095e+08	1.13692e+09	8.00855e+08	9.43701e+08	7.83725e+08	9.67948e+08	6.79159e+08	8.69653e+08	7.35302e+08	7.53925e+08	1.11559e+09	1.15888e+09	8.77863e+08	1.96437e+09	7.61895e+08	7.56253e+08	5.44664e+08	9.67841e+08	0.5628	down	3.91892e-05	0.00154803	1.73955	yes
NEG	NEG_465.25_4.7702	465.25	4.7702	Etiocholanolone glucuronide	73.55	C25H38O8	Lipids and lipid-like molecules	Steroids and steroid derivatives	HMDB0004484	C11136	map00140(Steroid hormone biosynthesis)	Androsterone glucuronide;Etiocholanolone glucuronide;5-alpha-Dihydrotestosterone glucuronide;3-alpha-hydroxy-5-alpha-androstane-17-one 3-D-glucuronide;5alpha-Androstan-17beta-ol-3-one glucosiduronate;DG(2:0/20:5(7Z,9Z,11E,13E,17Z)-3OH(5,6,15)/0:0);DG(20:5(7Z,9Z,11E,13E,17Z)-3OH(5,6,15)/2:0/0:0);DG(2:0/0:0/20:5(7Z,9Z,11E,13E,17Z)-3OH(5,6,15));DG(20:5(7Z,9Z,11E,13E,17Z)-3OH(5,6,15)/0:0/2:0);N-Eicos…	1.38055e+06	254459	1.22691e+06	7.04128e+06	1.94172e+06	1.15665e+06	1.29112e+06	1.01456e+06	1.10565e+06	1.04342e+06	1.10902e+06	1.15672e+06	5.64649e+06	1.82807e+06	1.78718e+06	739273	97992.2	590055	88911.1	189526	718425	486460	334720	207911	189222	421123	840150	2.42698e+06	1.29695e+06	1.94262e+06	651280	2.9828	up	0.00133502	0.0195316	2.2288	yes
NEG	NEG_239.201_7.9932	239.201	7.9932	Exaltolide	95.79	C15H28O2	Phenylpropanoids and polyketides	Macrolides and analogues	HMDB0034455	NA	NA	9-Pentadecenoic acid;Isobutyl 10-undecenoate;Exaltolide;Butyl undecylenate;Rhodinyl isovalerate;Menthyl isovalerate;Citronellyl pentanoate;Citronellyl isovalerate;Auberganol;15,5-Farnesanolide;Pentadecenoic acid;Menthyl valerate;10Z-Pentadecenoic acid;(Z)-1,5-Tridecadiene;1,11-Tridecadiene	1.12173e+07	8.59485e+06	2.0932e+07	9.11497e+06	1.29026e+07	1.75237e+07	1.22033e+07	1.75598e+07	2.23458e+07	9.18939e+06	1.07109e+07	2.72608e+07	1.65979e+07	1.1109e+07	2.2405e+07	1.57327e+07	2.09412e+07	1.52362e+07	2.08924e+07	2.05129e+07	1.88375e+07	2.19329e+07	1.2085e+07	2.54721e+07	3.01468e+07	2.20269e+07	3.00977e+07	1.71107e+07	1.78819e+07	1.48044e+07	2.09593e+07	0.7063	down	0.00388264	0.0413155	1.2565	yes
NEG	NEG_258.241_8.9305	258.241	8.9305	FA 16:0-d3	96.85	C16H32O2	Lipids and lipid-like molecules	Fatty Acyls	NA	NA	NA	NA	3.6197e+06	3.38133e+06	5.43876e+06	4.1112e+06	4.3978e+06	6.70481e+06	3.81276e+06	4.81954e+06	5.46305e+06	3.8527e+06	3.68823e+06	6.25599e+06	3.83323e+06	3.5554e+06	6.03409e+06	5.12343e+06	5.21769e+06	5.06651e+06	5.24001e+06	5.47479e+06	5.41898e+06	5.26668e+06	5.7554e+06	6.61455e+06	6.14764e+06	5.76009e+06	7.73818e+06	4.74524e+06	5.09064e+06	4.49532e+06	5.68595e+06	0.7906	down	0.0014718	0.0210671	1.0677	yes
NEG	NEG_311.223_5.9864	311.223	5.9864	FA 18:2+2O	70.88	C18H32O4	Lipids and lipid-like molecules	Fatty Acyls	NA	NA	NA	13-L-Hydroperoxylinoleic acid;8(R)-Hydroperoxylinoleic acid;9(S)-HPODE;12,13-DiHODE;15,16-DiHODE;9,10-DiHODE;(&#177;)-(E)-13-Hydroxy-10-oxo-11-octadecenoic acid;11-HpODE;(10E,12Z)-(9S)-9-Hydroperoxyoctadeca-10,12-dienoic acid;13-HPODE(1-);9-Hpode;18-Hydroperoxyoctadeca-2,4-dienoic acid;Octadecendioic acid;octadecenedioate;4-Hydroxynonenal;2,4-Nonanedione;2-Nonenoic acid;6-Butyltetrahydro-2H-pyran…	1.48312e+06	1.50435e+06	2.40747e+06	7.22939e+06	985914	3.03125e+06	2.01059e+06	5.39839e+06	1.23067e+06	3.53802e+06	1.07467e+06	850227	917998	948365	1.31302e+06	886718	1.23618e+06	1.37013e+06	827700	911383	913971	927472	1.22384e+06	1.39065e+06	810401	1.03612e+06	1.38274e+06	626583	1.69526e+06	2.32932e+06	1.06121e+06	2.195	up	0.0106454	0.0854712	1.47649	yes
NEG	NEG_327.254_7.6107	327.254	7.6107	FAHFA 16:0/3:0	80.98	C19H36O4	Lipids and lipid-like molecules	Fatty Acyls	NA	NA	NA	MG(0:0/16:1(9Z)/0:0);MG(16:1(9Z)/0:0/0:0);Avocadene 1-acetate;Avocadene 2-acetate;Avocadene 4-acetate;Glyceryl palmitoleate;Methyl 8-[3-(2-hydroxyoctyl)oxiran-2-yl]octanoate;2,5-Diethyl-3,6-dimethylpyrazine;2,3-Diethyl-5,6-dimethylpyrazine;2,6-Diethyl-3,5-dimethylpyrazine;Trimethylpropylpyrazine;N,N,N',N'-Tetramethyl-P-phenylenediamine;N,N-Diethyl-P-phenylenediamine;3,5- and 3,6-Dimethyl-2-isobut…	228428	662689	2.42038e+06	1.36315e+06	388935	938477	450925	820551	3.49953e+06	6.81274e+06	2.02542e+06	2.99643e+06	202921	691744	1.65594e+06	2.53267e+06	9.85186e+06	1.15172e+06	3.95713e+06	1.58959e+06	2.53809e+06	1.05701e+07	1.35072e+06	1.24665e+06	1.29761e+06	1.02028e+06	2.44384e+06	2.85377e+06	2.41294e+06	1.67874e+06	3.14714e+06	0.5334	down	0.0265233	0.157765	1.56148	yes
NEG	NEG_507.442_8.2763	507.442	8.2763	FAHFA(16:1(9Z)/9-O-16:0)	71.98	C32H60O4	Lipids and lipid-like molecules	Fatty Acyls	HMDB0112157	NA	NA	FAHFA(16:1(9Z)/5-O-16:0);FAHFA(16:1(9Z)/7-O-16:0);FAHFA(16:1(9Z)/8-O-16:0);FAHFA(16:1(9Z)/9-O-16:0);FAHFA(16:1(9Z)/10-O-16:0);FAHFA(16:1(9Z)/11-O-16:0);FAHFA(16:1(9Z)/12-O-16:0);FAHFA(16:1(9Z)/13-O-16:0);FAHFA(16:1(9Z)/6-O-16:0);Hypogeic acid;Trans-Hexa-dec-2-enoic acid;Palmitelaidic acid;(E)-6-Hexadecenoic acid;5-Dodecyldihydro-2(3H)-furanone;15-Hexadecanolide;(Z)-5-Hexadecenoic acid;(E)-3-Hexad…	6.95957e+06	2.78627e+06	7.59492e+06	3.10802e+06	2.52542e+06	3.12024e+07	2.56736e+06	3.09592e+06	1.96303e+07	1.81446e+06	1.87477e+06	3.26118e+07	1.4907e+06	2.0905e+06	5.9072e+07	1.90242e+07	5.86594e+07	1.94369e+07	2.82199e+07	2.57134e+07	1.49299e+07	1.74399e+07	1.22851e+07	4.54408e+07	4.71499e+07	2.2232e+07	1.05282e+08	2.45366e+07	2.20991e+07	8.52517e+06	3.5673e+07	0.239	down	1.46031e-05	0.000778092	3.12547	yes
POS	POS_209.039_0.8166	209.039	0.8166	FRAXETIN	74.74	C10H8O5	Phenylpropanoids and polyketides	Coumarins and derivatives	NA	NA	NA	Isoquinolinesulfonamide;Diphenyl sulfide	7.77004e+06	6.25009e+06	3.46396e+06	3.38556e+06	6.04958e+06	2.64856e+06	4.30517e+06	1.81202e+06	3.33101e+06	4.11356e+06	5.41471e+06	3.24608e+06	4.75906e+06	5.22289e+06	2.57011e+06	1.75203e+06	4.0079e+06	1.79282e+06	2.34209e+06	2.6899e+06	1.13345e+06	3.3379e+06	1.47061e+06	594464	2.47676e+06	1.76821e+06	2.14931e+06	1.70485e+06	3.2701e+06	4.41231e+06	2.12789e+06	2.0736	up	9.62347e-05	0.00307951	1.8973	yes
POS	POS_323.099_3.7365	323.099	3.7365	Farrerol	97	C17H16O5	Phenylpropanoids and polyketides	Flavonoids	HMDB0130571	NA	NA	2-keto-3-deoxy-L-rhamnonate;Lepidimoic acid;Promazine;Promethazine;N-Desmethyltrimeprazine;Siguazodan;1-{2-[(3-Ethylphenyl)amino]-2-oxoethyl}-6-oxo-1,6-dihydropyridine-3-carboxylic acid;Bcl-2 Inhibitor;Desmedipham;Histidine glutamate;5-Nitro-2-(3-phenylpropylamino)benzoic acid;Phenmedipham	54172.9	3274.74	37140.2	1409.45	15212.2	4059.85	7912.07	20930.6	10166.6	27636.2	13533.8	12625.5	30652	2565.25	125711	128060	284579	129683	193419	45298.7	114617	44025	45804.5	141825	128049	110551	314839	105335	76895.9	17235.1	136557	0.1262	down	6.54253e-07	7.30177e-05	3.69158	yes
NEG	NEG_306.244_9.0523	306.244	9.0523	Fingolimod	96.29	C19H33NO2	Organic nitrogen compounds	Organonitrogen compounds	NA	NA	NA	Fingolimod;Pumiliotoxin A;(2R)-1-(4-Nonylphenyl)propan-2-amine	379186	297618	863479	216904	84601.3	3.21235e+06	43908.4	253342	968315	207312	199432	2.09591e+06	235184	179828	2.36444e+06	1.57541e+06	1.14507e+06	1.58971e+06	2.17454e+06	1.43119e+06	928659	697943	1.22717e+06	3.03763e+06	2.01109e+06	1.26077e+06	4.36545e+06	915295	1.21292e+06	659812	1.76603e+06	0.3736	down	0.00027815	0.00678155	2.69992	yes
NEG	NEG_513.31_7.0565	513.31	7.0565	Flavidulol C	74.73	C34H42O4	Benzenoids	Phenol ethers	HMDB0039150	NA	NA	N-Docosahexaenoyl Tryptophan;maropitant;Ezlopitant;DG(2:0/20:3(8Z,11Z,14Z)-2OH(5,6)/0:0);DG(20:3(8Z,11Z,14Z)-2OH(5,6)/2:0/0:0);DG(2:0/0:0/20:3(8Z,11Z,14Z)-2OH(5,6));DG(20:3(8Z,11Z,14Z)-2OH(5,6)/0:0/2:0);1-(4-O-beta-D-glucopyranosyl-3-methoxyphenyl)-3,5-dihydroxydecane	852745	151222	143748	271491	649199	265924	236653	110751	848245	322151	215497	120962	237775	64364.4	144435	54154.1	173090	112771	79691.1	177894	102903	137020	130925	111099	183188	102127	151296	132531	224423	320766	128080	2.5044	up	0.00651706	0.0599551	1.58828	yes
POS	POS_432.309_5.1263	432.309	5.1263	GLYCOCHENODEOXYCHOLATE	77.58	C26H43NO5	Lipids and lipid-like molecules	Steroids and steroid derivatives	HMDB0000637	C05466	map00120(Primary bile acid biosynthesis);map00121(Secondary bile acid biosynthesis);map04976(Bile secretion);map04979(Cholesterol metabolism)	11'-Carboxy-alpha-tocotrienol;Lupulone;Adlupulone;Desoxycorticosterone pivalate	3.10165e+07	3.11378e+07	2.16618e+07	9.34702e+07	6.34981e+06	2.57341e+07	1.88373e+07	1.24684e+07	1.29946e+07	1.74636e+07	2.16626e+07	7.3572e+06	4.93993e+07	2.02847e+07	7.25348e+06	1.55697e+07	1.15551e+07	4.85152e+06	1.47269e+06	5.85862e+06	7.48771e+06	7.70938e+06	4.04067e+06	3.72101e+06	2.00523e+06	3.79582e+06	5.4919e+06	3.42277e+06	1.62169e+07	2.6417e+07	6.01682e+06	4.3905	up	7.05708e-06	0.000453835	2.71174	yes
POS	POS_599.249_5.6235	599.249	5.6235	Gal&#946;1-4[Fuc&#945;1-3]GlcNAc&#946;-Sp	75.45	C22H38N4O15	NA	NA	NA	NA	NA	Bafetinib	184559	434731	424540	358570	210576	381128	174799	274316	192257	214544	210507	384956	670378	344213	734830	406776	1.25907e+06	644583	982038	284774	425395	288187	328490	867907	546975	621888	2.3923e+06	638643	531498	318577	744419	0.428	down	0.000792127	0.0136238	1.77761	yes
NEG	NEG_483.287_5.3592	483.287	5.3592	Gallopamil	70.55	C28H40N2O5	Benzenoids	Benzene and substituted derivatives	NA	NA	NA	Gallopamil;Porrigenin A;Asperagenin;1-[(2R)-2-(1,3-Benzodioxol-4-yl)heptyl]-3-[2,6-di(propan-2-yl)phenyl]urea;Devazepide;Sergolexole	65450.8	129486	4528.72	91797.8	45904.3	53716.3	89693.4	92357.8	29339.2	39533.8	75395.6	77343.3	162204	98067.2	213240	3.04542e+06	267072	238999	48180.1	41205.2	192936	662704	207744	201974	100630	210178	72445.1	71040.1	236735	75344.1	398126	0.1892	down	0.00666584	0.0609867	2.09819	yes
NEG	NEG_129.019_1.3	129.019	1.3	Gamma-delta-Dioxovaleric acid	75.25	C5H6O4	Organic acids and derivatives	Keto acids and derivatives	HMDB0013233	C02800	map00860(Porphyrin metabolism)	Glutaconic acid;Citraconic acid;Mesaconic acid;Itaconic acid;Gamma-delta-Dioxovaleric acid;Methyl hydrogen fumarate;2-Hydroxyglutaric acid lactone;2,5-Dioxopentanoate;(Z)-4-Methoxy-4-oxobut-2-enoic acid;2-Methylbut-2-enedioic acid;Pentenedioic acid;4-Hydroxy-2-butenoic acid gamma-lactone;Furanone A;1,4-Dioxin;3-Hydroxycyclobut-2-en-1-one;But-2-enedial;Diketene;Propynoic acid	1.27768e+06	914550	1.14963e+06	583919	1.01753e+06	620250	733225	857878	1.1774e+06	717938	900912	838880	817238	787642	541582	428983	643689	306676	587087	261427	480945	698310	296565	316009	826555	592361	230806	285701	674692	885334	464050	1.9078	up	2.03401e-05	0.000973985	1.92371	yes
POS	POS_347.123_3.4991	347.123	3.4991	Glabranin	79.4	C20H20O4	Phenylpropanoids and polyketides	Flavonoids	HMDB0032104	C09752	NA	Nifedipine;meta-O-Dealkylated flecainide lactam;M-Nifedipine;2,6-Dimethyl-4-(2-nitrophenyl)-3,4-dihydropyridine-3,5-dicarboxylic acid dimethyl ester;ACRL Toxin II;1-[(5-Amino-5-carboxypentyl)amino]-1-deoxyfructose;15-Deacetylcalonectrin;Dihydrocumambrin A;(2R)-2-Amino-6-[[(3S,4R,5R)-3,4,5,6-tetrahydroxy-2-oxohexyl]amino]hexanoic acid;1-O-Acetyl britannilactone;Fructose-lysine;Fructosyl-lysine;DHA…	113209	88678.6	63801.1	107314	62283.8	55400.9	102272	170284	118859	67007.4	83754.2	157151	130473	67356.5	221892	345949	337720	392926	417457	154175	167118	171075	161814	319609	186978	220578	291745	379175	184145	99131.7	269158	0.3683	down	1.05751e-07	1.56417e-05	2.39546	yes
POS	POS_526.253_4.7541	526.253	4.7541	Glu Ile Ala His Gly	82.02	C22H35N7O8	NA	NA	NA	NA	NA	virginiamycin m1;Selpercatinib;Lysyl-aspartyl-glutamyl-leucine;6-O-Oleuropeoylsucrose;Tert-butyl N-[(2S,3R)-3-hydroxy-4-[(4-methoxyphenyl)sulfonyl-propan-2-yloxyamino]-1-phenylbutan-2-yl]carbamate	453384	113526	141239	137725	38114.2	149287	131356	140101	88461.2	124420	106124	84659.2	467735	190339	189761	59318.8	14046.7	65273.4	76633.7	64162.4	64318.2	49203.1	32302	155446	14189.2	50999.7	57446	4820.45	116585	169034	64137.2	2.6355	up	0.00160268	0.0220978	2.12174	yes
POS	POS_504.272_4.7605	504.272	4.7605	Glu Ile Ser Arg	96.87	C20H37N7O8	NA	NA	NA	NA	NA	Glycocholic acid;3a,7b,12a-Trihydroxyoxocholanyl-Glycine;Glycohyocholic acid;N-Choloylglycine;dihydrocytochalasin B	465058	109249	492216	3.76377e+06	63996.6	496659	488149	401126	444356	419940	448730	415081	3.08818e+06	631668	717164	323855	45265.4	223914	32374.6	68048.3	282127	159893	123085	58986.7	87251.9	204729	277365	39632.7	513281	837727	188835	4.4363	up	0.00145405	0.0208695	2.31636	yes
POS	POS_560.262_4.7265	560.262	4.7265	Glu Ser Val Pro Glu	86.94	C23H37N5O11	NA	NA	NA	NA	NA	Cochinchinenin B	218097	47568.5	55284.7	193620	1890.34	138936	90787.3	44928.5	18664.9	151748	33912.8	39553.7	369463	60581.4	79853	13241.2	47540.2	28130.3	5371.02	48040.5	23775.3	17683.3	67466.5	3406.92	69300.6	2852.08	84028	3682.43	69978.8	104645	35312.2	2.9634	up	0.0315186	0.17741	1.77186	yes
NEG	NEG_90.0276_0.8396	90.0276	0.8396	Glyceraldehyde	74.95	C3H6O3	Organic oxygen compounds	Organooxygen compounds	HMDB0001051	C02154	NA	NA	3.65827e+07	1.61443e+07	1.99402e+07	2.58167e+07	1.36608e+07	2.802e+07	3.47593e+07	3.11634e+07	2.48367e+07	1.4878e+07	2.12813e+07	1.99785e+07	1.99865e+07	1.81962e+07	4.35796e+07	4.85842e+07	3.38632e+07	4.25338e+07	3.12635e+07	3.21768e+07	4.09672e+07	3.5405e+07	3.94158e+07	4.0174e+07	3.932e+07	4.5068e+07	2.65604e+07	3.77783e+07	3.07834e+07	2.32318e+07	3.8335e+07	0.606	down	1.36284e-05	0.000743529	1.68569	yes
NEG	NEG_448.306_5.1387	448.306	5.1387	Glycochenodeoxycholic acid	90.05	C26H43NO5	Lipids and lipid-like molecules	Steroids and steroid derivatives	HMDB0000637	C05466	map00120(Primary bile acid biosynthesis);map00121(Secondary bile acid biosynthesis);map04976(Bile secretion);map04979(Cholesterol metabolism)	Deoxycholic acid glycine conjugate;Chenodeoxyglycocholic acid;Chenodeoxycholylglycine;Deoxycholylglycine;Glycohyodeoxycholic acid;N-Palmitoyl phenylalanine;N-Arachidonoyl Valine;N-Arachidonoyl GABA	5.89835e+07	5.2111e+07	3.91185e+07	1.71038e+08	9.46349e+06	4.26549e+07	3.18027e+07	1.84e+07	2.09273e+07	2.98026e+07	4.37746e+07	1.24935e+07	1.07047e+08	3.32437e+07	9.11624e+06	2.57117e+07	1.94101e+07	7.05497e+06	2.69183e+06	8.79655e+06	1.94082e+07	1.1244e+07	5.91209e+06	6.07237e+06	2.73348e+06	7.10936e+06	7.62848e+06	5.95922e+06	2.89182e+07	4.79186e+07	9.91776e+06	4.8316	up	1.05566e-05	0.000608355	2.76596	yes
NEG	NEG_464.301_4.7717	464.301	4.7717	Glycocholic acid	97.28	C26H43NO6	Lipids and lipid-like molecules	Steroids and steroid derivatives	HMDB0000138	C01921	map00120(Primary bile acid biosynthesis);map00121(Secondary bile acid biosynthesis);map01100(Metabolic pathways);map04976(Bile secretion);map04979(Cholesterol metabolism)	Glycocholic acid;3a,7b,12a-Trihydroxyoxocholanyl-Glycine;Glycohyocholic acid;N-Choloylglycine;Stearidonyl carnitine;N-Palmitoyl tyrosine;(6Z,9Z,12Z,15Z)-Octadeca-6,9,12,15-tetraenoylcarnitine;N-Arachidonoyl Threonine;Diterpene alkaloid	5.03802e+06	1.26438e+06	4.2939e+06	2.4444e+07	641612	4.52097e+06	4.66788e+06	3.77384e+06	4.16069e+06	4.05832e+06	4.09502e+06	4.24124e+06	2.02994e+07	6.50962e+06	6.21434e+06	2.84876e+06	513923	2.35643e+06	504745	805662	2.91152e+06	1.85097e+06	1.38469e+06	882835	952152	1.66179e+06	3.02751e+06	585202	4.23248e+06	6.57207e+06	1.89289e+06	3.472	up	0.00145357	0.0208695	2.14516	yes
POS	POS_450.319_5.1245	450.319	5.1245	Glycodeoxycholic acid	95.75	C26H43NO5	Lipids and lipid-like molecules	Steroids and steroid derivatives	HMDB0000631	C05464	NA	Deoxycholic acid glycine conjugate;Chenodeoxyglycocholic acid;Chenodeoxycholylglycine;Deoxycholylglycine;Glycohyodeoxycholic acid;Latanoprost;7-[(1R,2R,3R,5S)-3,5-Dihydroxy-2-[(3R)-3-hydroxy-5-phenylpentyl]cyclopentyl]-5-heptenoic acid propan-2-yl ester	2.81947e+07	2.7044e+07	1.79385e+07	1.17354e+08	6.58683e+06	2.4475e+07	2.21156e+07	8.6222e+06	1.19634e+07	2.09947e+07	1.65063e+07	6.64656e+06	5.74673e+07	1.8931e+07	8.90144e+06	1.95842e+07	1.11912e+07	9.3948e+06	1.31714e+06	6.39021e+06	2.44943e+07	8.43845e+06	3.04689e+06	2.44161e+06	2.6002e+06	3.15999e+06	5.94187e+06	3.21746e+06	1.76771e+07	2.74886e+07	7.8657e+06	3.4947	up	0.000403326	0.00865981	2.34988	yes
POS	POS_921.612_5.1258	921.612	5.1258	Glycohyodeoxycholic acid	87.88	C26H43NO5	Lipids and lipid-like molecules	Steroids and steroid derivatives	NA	NA	NA	PG(i-22:0/6 keto-PGF1alpha);PG(6 keto-PGF1alpha/i-22:0);PG(i-22:0/TXB2);PG(TXB2/i-22:0);PG(i-24:0/20:3(5Z,8Z,11Z)-O(14R,15S));PG(20:3(5Z,8Z,11Z)-O(14R,15S)/i-24:0);PG(i-24:0/20:3(5Z,8Z,14Z)-O(11S,12R));PG(20:3(5Z,8Z,14Z)-O(11S,12R)/i-24:0);PG(i-24:0/20:3(5Z,11Z,14Z)-O(8,9));PG(20:3(5Z,11Z,14Z)-O(8,9)/i-24:0);PG(i-24:0/20:3(8Z,11Z,14Z)-O(5,6));PG(20:3(8Z,11Z,14Z)-O(5,6)/i-24:0);PG(i-24:0/20:4(5Z,8…	1.28025e+06	1.492e+06	685449	1.17741e+07	69874	1.04759e+06	492191	173387	278963	393809	671607	86418.7	2.56326e+06	605299	58069.3	348985	222883	64261.7	156224	40621.5	301056	76551.1	9757.95	7508.13	182038	12053.9	32005.6	6647.43	826175	1.54387e+06	108476	14.2324	up	6.99568e-05	0.0024315	3.4101	yes
NEG	NEG_897.619_5.138	897.619	5.138	Glycoursodeoxycholic acid	81.49	C26H43NO5	Lipids and lipid-like molecules	Steroids and steroid derivatives	HMDB0000708	NA	NA	PG(i-24:0/20:3(5Z,8Z,11Z)-O(14R,15S));PG(20:3(5Z,8Z,11Z)-O(14R,15S)/i-24:0);PG(i-24:0/20:3(5Z,8Z,14Z)-O(11S,12R));PG(20:3(5Z,8Z,14Z)-O(11S,12R)/i-24:0);PG(i-24:0/20:3(5Z,11Z,14Z)-O(8,9));PG(20:3(5Z,11Z,14Z)-O(8,9)/i-24:0);PG(i-24:0/20:3(8Z,11Z,14Z)-O(5,6));PG(20:3(8Z,11Z,14Z)-O(5,6)/i-24:0);PG(i-24:0/20:4(5Z,8Z,11Z,14Z)-OH(20));PG(20:4(5Z,8Z,11Z,14Z)-OH(20)/i-24:0);PG(i-24:0/20:4(6E,8Z,11Z,14Z)-O…	842466	574000	217871	5.22122e+06	26020	375539	140434	46766.3	101527	143168	231719	30750	1.74719e+06	223867	17824.7	135791	65540	358058	144557	253890	69658.6	19706.8	504995	3196.54	268515	326952	2509.2	1786.75	431983	708753	155213	4.5663	up	0.0360234	0.191511	2.10157	yes
POS	POS_432.309_4.7625	432.309	4.7625	Glycoursodeoxycholic acid	74.98	C26H43NO5	Lipids and lipid-like molecules	Steroids and steroid derivatives	HMDB0000708	NA	NA	11'-Carboxy-alpha-tocotrienol;Lupulone;Adlupulone;Desoxycorticosterone pivalate	3.11046e+06	8.92055e+06	4.81483e+06	9.67456e+06	2.52429e+06	4.33055e+06	887009	951460	7.03807e+06	797124	903042	3.88225e+06	1.18085e+07	2.00989e+06	2.22054e+06	4.19345e+06	3.02133e+06	386471	187784	174720	270671	1.75675e+06	567278	424717	89251	1.85286e+06	1.04819e+06	365780	2.7933e+06	4.40375e+06	1.18284e+06	3.723	up	0.000908865	0.0149368	2.56115	yes
NEG	NEG_267.233_8.6506	267.233	8.6506	Heptadec-2-enoic acid	84.17	C17H32O2	Lipids and lipid-like molecules	Fatty Acyls	NA	NA	NA	Cyclohexaneundecanoic acid;9E-Heptadecenoic acid;2,4-Heptadecanedione;7-Hexadecenoic acid, methyl ester;9Z-Heptadecenoic acid;trans-10-Heptadecenoic acid;Heptadec-2-enoic acid;Cadinene;Guaiane	2.3528e+07	1.40662e+07	6.33495e+07	2.34082e+07	3.45555e+07	1.19791e+08	2.15957e+07	4.85004e+07	9.54937e+07	1.9644e+07	1.41937e+07	1.54803e+08	1.92046e+07	2.54339e+07	1.66309e+08	1.13529e+08	1.1727e+08	1.06358e+08	1.29977e+08	8.84358e+07	7.67702e+07	8.75202e+07	8.16237e+07	1.31376e+08	1.50466e+08	1.03151e+08	3.15603e+08	8.20303e+07	8.67139e+07	4.83977e+07	1.2503e+08	0.3871	down	6.96024e-05	0.00242552	2.48051	yes
NEG	NEG_269.248_9.447	269.248	9.447	Heptadecanoic acid	87.75	C17H34O2	Lipids and lipid-like molecules	Fatty Acyls	HMDB0002259	NA	NA	Heptadecanoic acid;(S)-14-Methylhexadecanoic acid;Nonyl octanoate;3-Methylbutyl dodecanoate;Isopropyl tetradecanoate;(&#177;)-11-Methylhexadecanoic acid;Ethyl pentadecanoate;15-Methylpalmitate;Methyl hexadecanoic acid;2-Methylhexadecanoic acid;1-Hexadecene;1-Pentadecene;(E)-7-Pentadecene;Germacrane	9.49116e+07	1.25173e+08	2.10944e+08	9.95176e+07	1.61421e+08	2.64331e+08	1.05375e+08	2.3026e+08	2.3898e+08	1.50262e+08	1.45557e+08	3.61456e+08	1.4121e+08	1.4499e+08	3.26248e+08	2.4667e+08	2.32225e+08	2.7763e+08	3.08349e+08	1.61797e+08	2.35815e+08	2.39295e+08	2.63907e+08	3.3102e+08	3.31407e+08	1.91099e+08	3.30134e+08	2.20607e+08	2.20378e+08	1.76742e+08	2.64014e+08	0.6694	down	0.00122994	0.0184797	1.45439	yes
NEG	NEG_758.578_9.2365	758.578	9.2365	HexCer-NS d34:1	75.29	C40H77NO8	NA	NA	NA	NA	NA	PC(14:0/20:1(11Z));PC(14:1(9Z)/20:0);PC(16:0/18:1(11Z));PC(16:0/18:1(9Z));PC(16:1(9Z)/18:0);PC(18:0/16:1(9Z));PC(18:1(11Z)/16:0);PC(18:1(9Z)/16:0);PC(20:0/14:1(9Z));PC(20:1(11Z)/14:0);PE(15:0/22:1(13Z));PE(22:1(13Z)/15:0);PE-NMe(18:0/18:1(9Z));PE-NMe(18:0/18:1(11Z));PE-NMe(14:1(9Z)/22:0);PE-NMe(16:0/20:1(11Z));PE-NMe(16:1(9Z)/20:0);PE-NMe(14:0/22:1(13Z));PE-NMe(18:1(11Z)/18:0);PE-NMe(18:1(9Z)/18:…	1.76592e+06	1.20644e+06	1.07902e+06	1.06306e+06	1.39831e+06	876137	1.24833e+06	989741	372528	876313	619919	450302	271367	692328	568242	521093	449825	449444	810062	477659	670294	503693	807557	302860	440049	341655	140683	787309	720719	922122	519316	1.7756	up	0.00806504	0.0699882	1.36808	yes
POS	POS_367.266_5.4972	367.266	5.4972	Hexapropylene glycol	75.31	C18H38O7	Organic oxygen compounds	Organooxygen compounds	NA	NA	NA	QUINGESTANOL;Apo-12'-zeaxanthinal;Magnesium caprate	511699	460868	256437	229090	178146	580780	470016	441717	999660	475284	292754	1.63576e+06	888848	7900.01	2.22183e+06	867616	1.87449e+06	616464	876242	1.01049e+06	536454	575851	692230	886908	936864	825321	1.17452e+06	1.07136e+06	771272	530640	1.0119e+06	0.5244	down	0.0140442	0.103807	1.89516	yes
POS	POS_326.055_0.8266	326.055	0.8266	Hexyl 2,5-dichlorophenylphosphoroamidate	84.81	C12H18Cl2NO3P	Benzenoids	Benzene and substituted derivatives	NA	NA	NA	NA	6.3631e+06	1.49028e+07	1.85115e+07	1.24903e+07	1.726e+07	9.97701e+06	9.94839e+06	1.2642e+07	1.46749e+07	1.42751e+07	1.19031e+07	1.15496e+07	1.19739e+07	1.86493e+07	4.97415e+06	5.31173e+06	7.85707e+06	8.86365e+06	9.3061e+06	9.13531e+06	9.1194e+06	1.12486e+07	5.09595e+06	6.69067e+06	8.70916e+06	4.93606e+06	6.02855e+06	6.33864e+06	1.0312e+07	1.32229e+07	7.40108e+06	1.7866	up	1.02048e-05	0.000601091	1.7419	yes
NEG	NEG_253.134_5.0525	253.134	5.0525	Histidylvaline	75.32	C11H18N4O3	Organic acids and derivatives	Carboxylic acids and derivatives	NA	NA	NA	NA	135309	349167	411783	184854	104176	176986	235465	376541	378472	187992	98613.5	374337	644773	181766	519296	439416	1.14366e+06	649222	1.09078e+06	227806	491514	276385	392419	874731	683702	620262	1.44534e+06	444544	469261	274302	664220	0.413	down	0.000189564	0.00509644	2.03894	yes
POS	POS_189.134_0.7974	189.134	0.7974	Homoarginine	76.51	C7H16N4O2	Organic acids and derivatives	Carboxylic acids and derivatives	HMDB0000670	C01924	NA	L-Targinine;Methylarginine;delta-N-Methylarginine;Methyl L-argininate;N2-Methyl-L-arginine;(2S)-2-Amino-5-(diaminomethylideneamino)-4-methylpentanoic acid	1.30387e+06	2.33109e+06	2.82706e+06	1.45353e+06	3.04323e+06	1.60065e+06	5.78413e+06	3.25681e+06	1.5366e+06	1.87202e+06	1.88378e+06	2.00867e+06	2.07868e+06	2.02393e+06	5.77714e+06	6.06573e+06	5.17466e+06	5.63643e+06	5.04478e+06	2.74246e+06	4.21659e+06	6.19801e+06	2.27063e+06	3.93671e+06	4.84559e+06	5.69801e+06	1.49335e+06	3.37226e+06	3.40987e+06	2.35743e+06	4.46231e+06	0.5283	down	0.000283529	0.00687494	1.71389	yes
NEG	NEG_291.233_8.2822	291.233	8.2822	Hydroxysteroid	87.09	C19H32O2	Lipids and lipid-like molecules	Steroids and steroid derivatives	NA	NA	NA	3b,17b-Dihydroxyetiocholane;3a,17a-Dihydroxy-5b-androstane;5alpha-Androstane-3alpha,17alpha-diol;Androstanediol;Etiocholanediol;Dihydroandrosterone;Androstan-3alpha,17beta-diol;(17S)-10,13-Dimethyl-2,3,4,5,6,7,8,9,11,12,14,15,16,17-tetradecahydro-1H-cyclopenta[a]phenanthrene-3,17-diol;Hydroxysteroid;Methyl linolenate;Dodecylbenzene;Estrane;6-Phenylundecane;Gonane;Aplotaxene;(Z,Z,Z)-1,8,11,14-Hept…	719086	870032	1.93861e+06	577878	900787	2.57158e+06	623640	898699	2.2718e+06	794389	437280	3.98661e+06	480905	418168	3.42388e+06	2.51787e+06	2.62908e+06	2.49543e+06	2.91656e+06	2.63264e+06	1.56114e+06	2.49194e+06	2.97976e+06	4.03107e+06	3.82531e+06	2.71359e+06	3.85179e+06	2.44369e+06	2.07154e+06	1.24925e+06	2.89384e+06	0.4317	down	6.61272e-05	0.00234118	2.37292	yes
POS	POS_71.0603_9.1428	71.0603	9.1428	Imidazoline	71.73	C3H6N2	Organoheterocyclic compounds	Azolines	NA	NA	NA	Beta-Aminopropionitrile;Imidazoline;Diazopropane;Acrylonitrile	5.4552e+07	2.48565e+07	7.77722e+06	4.3e+07	3.97038e+07	3.56875e+07	5.34608e+07	3.38123e+07	9.49582e+06	5.43048e+07	4.80344e+07	1.77116e+07	7.06173e+06	8.50643e+07	7.6398e+07	1.54237e+07	6.02417e+07	4.16841e+07	6.38669e+07	4.0033e+07	6.40771e+07	4.39824e+07	3.94038e+07	3.14976e+07	7.84575e+07	8.49418e+07	5.5162e+07	3.82644e+07	4.45699e+07	3.67516e+07	5.23881e+07	0.7015	down	0.0496838	0.231256	1.2927	yes
NEG	NEG_199.17_7.4201	199.17	7.4201	Isolauric acid	97	C12H24O2	NA	NA	NA	NA	NA	Dodecanoic acid;Ethyl decanoate;2-Heptyl butyrate;Nonanal propyleneglycol acetal;Hexyl hexanoate;Isopropyl nonanoate;Octyl butanoate;Octyl 2-methylpropanoate;(R)-Dihydrocitronellol acetate;Pentyl heptanoate;Decyl acetate;Isobutyl octanoate;Isohexyl isocaproate;2-(L-Menthoxy)ethanol;2-Nonanone propyleneglycol acetal;heptyl 2-methylbutyrate;butyl octanoate;3-Hexanone;4-Methylpentanal;Methyl isobuty…	1.21805e+08	1.12428e+08	1.5083e+08	9.75569e+07	1.31401e+08	1.38235e+09	1.43757e+08	1.25778e+08	2.26941e+08	1.47647e+08	1.444e+08	2.90918e+08	1.32454e+08	1.38614e+08	4.3393e+08	2.51156e+08	2.89221e+08	2.82105e+08	4.42855e+08	2.03623e+08	3.0951e+08	2.26655e+08	2.12081e+08	5.17241e+08	4.75519e+08	3.25224e+08	5.28435e+08	3.37395e+08	2.92208e+08	2.39063e+08	3.45353e+08	0.6922	down	0.00354344	0.0389105	1.65054	yes
NEG	NEG_171.139_5.2125	171.139	5.2125	Isopentyl isopentanoate	75.08	C10H20O2	Lipids and lipid-like molecules	Fatty Acyls	HMDB0030029	C12289	NA	Capric acid;1,1-Diethoxy-2-hexene;Isopentyl isopentanoate;Methyl nonanoate;7-Hydroxy-3,7-dimethyloctanal;Pentyl 3-methylbutanoate;Isooctyl acetate;Acetaldehyde 1,3-octanediol acetal;Ethyl 2-ethylhexanoate;Heptanal propyleneglycol acetal;Hexanal butane-2,3-diol acetal;Hexyl butyrate;Propyl heptanoate;4-Methylnonanoic acid;trans-p-Menthane-1,8-diol;(1R,2S,3S,4R)-p-Menthane-2,3-diol;4-Ethyloctanoic …	295560	566166	522781	502221	318690	1.04886e+06	493855	459617	2.95019e+06	340394	433996	3.04227e+06	412451	426100	5.04414e+06	1.12744e+06	5.03451e+06	797336	3.39657e+06	1.58479e+06	1.11755e+06	1.21756e+06	493003	1.33392e+06	2.49538e+06	1.43313e+06	2.04943e+06	2.15138e+06	1.46747e+06	843797	2.09115e+06	0.4035	down	0.000598527	0.0112537	2.15973	yes
POS	POS_369.159_4.5449	369.159	4.5449	Jasminoside B	75.3	C16H26O8	Organic oxygen compounds	Organooxygen compounds	NA	NA	NA	2-Aminodipyrido[1,2-a:3',2'-d]imidazole;3-Methyl-1,2,4-triazolo[3,4-A]phthalazine;Chembl4513510;Adinazolam;Epicillin	246670	274940	177852	327995	165985	159959	234201	540300	597807	347607	367374	252042	416510	438128	141307	173160	139668	231842	139833	245826	111675	441203	93953.1	155659	212979	231784	242038	182379	260381	324812	195950	1.6576	up	0.00320044	0.035953	1.37528	yes
NEG	NEG_341.169_4.4904	341.169	4.4904	Jasmolone glucoside	71.01	C17H26O7	Organic oxygen compounds	Organooxygen compounds	HMDB0032870	NA	NA	14-Fluoro-6-thiaheptadecanoic acid;2,8-Dibenzylcyclooctanone;epitiostanol;(E)-4-(2-(5,6,7,8-Tetrahydro-8,8-dimethyl-2-naphthalenyl)-1-propenyl)benzenemethanol;N-[(3s)-2-Oxotetrahydrofuran-3-Yl]butanamide;Diethadione	32102.2	75835.8	14151.9	228624	5469.29	136016	75565.4	271289	194920	41327.8	96846.3	40953.3	55249.5	33551.8	44742.2	131244	163240	1.19241e+06	712350	88098.1	85572.4	44146.8	167398	496279	25816.3	304584	206847	48658.9	179046	92993.1	265099	0.3508	down	0.0439759	0.215699	1.58171	yes
NEG	NEG_435.222_4.559	435.222	4.559	Kanzonol I	71.83	C27H32O5	Phenylpropanoids and polyketides	Isoflavonoids	HMDB0040606	NA	NA	Flurandrenolide;Kanzonol I;Depropionylbezitramide;3-Hydroxysebacic acid;2-Hydroxydecanedioic acid;5-Hydroxysebacate;Lubiprostone;(3S,5R,6S,7E,9x)-7-Megastigmene-3,6,9-triol 9-glucoside;7,8-Dihydro-3b,6a-dihydroxy-alpha-ionol 9-glucoside;Fluorometholone;Desoximetasone;Topisolon;estradiol benzoate;17beta-Estradiol benzoate;Etofenprox;Fluocortolone;Fluoromethalone;TRISPHENOL	114236	90329	11456.4	264509	12396.5	12375.9	72427.2	133313	2416.77	247888	42210.4	7661.59	12742.9	10405.4	39320.9	25321	38728.9	15847.7	15149.9	1783.29	53386.6	1864.52	2178.75	5757.63	6675.19	12157.9	13748.3	2027.98	45297	73883.4	16710.6	4.4213	up	0.024011	0.14894	1.91239	yes
NEG	NEG_177.04_0.7504	177.04	0.7504	L-Gulonolactone	71.32	C6H10O6	Organoheterocyclic compounds	Lactones	HMDB0003466	C01040	map00053(Ascorbate and aldarate metabolism);map01100(Metabolic pathways);map01240(Biosynthesis of cofactors)	Gluconolactone;2-Keto-3-deoxy-D-gluconic acid;3-Keto-b-D-galactose;Galactonolactone;D-Arabino-hexos-2-ulose;Methylthiomethyl 2-methylbutanethiolate;D-Gulono-1,4-lactone;D-Gluconic acid, delta-lactone;(3R,4R,5S,6R)-3,4,5,6-Tetrahydroxyoxepan-2-one;L-galactono-1,4-lactone;Monoethyl malonic acid;Ethylmalonic acid;Glutaric acid;Methylsuccinic acid;Dimethylmalonic acid;2-Acetolactate;2-C-Methyl-1,4-er…	1.00436e+07	6.87531e+06	6.56229e+06	6.67763e+06	8.47635e+06	6.24315e+06	7.18796e+06	5.93948e+06	6.87957e+06	7.02999e+06	7.57511e+06	5.52751e+06	6.39364e+06	6.44727e+06	5.38511e+06	4.33564e+06	5.39094e+06	5.59581e+06	4.6859e+06	4.51136e+06	6.9075e+06	5.31999e+06	4.73841e+06	5.8034e+06	6.5087e+06	3.90988e+06	4.92956e+06	4.85082e+06	6.09757e+06	6.98992e+06	5.20522e+06	1.3429	up	2.36309e-05	0.00108474	1.21303	yes
POS	POS_260.185_3.9387	260.185	3.9387	L-Hexanoylcarnitine	84.68	C13H25NO4	Lipids and lipid-like molecules	Fatty Acyls	HMDB0000756	NA	NA	4-Methylpentanoylcarnitine;3-Methylpentanoylcarnitine;2-Carboxy-4-dodecanolide;(3S,5R,6R,7E)-3,5,6-Trihydroxy-7-megastigmen-9-one	5.20465e+06	6.04339e+06	6.40138e+06	4.83895e+06	6.17727e+06	1.35639e+07	8.2998e+06	6.94113e+06	2.28739e+07	7.04456e+06	3.63046e+06	2.73399e+07	2.55698e+06	2.62632e+06	4.66108e+07	1.26733e+07	4.75529e+07	1.46713e+07	2.37452e+07	1.38036e+07	1.07923e+07	1.08657e+07	7.01465e+06	1.75357e+07	2.11389e+07	1.51928e+07	1.63794e+07	2.02674e+07	1.43495e+07	8.82447e+06	1.98746e+07	0.444	down	0.000613107	0.0113673	2.06878	yes
NEG	NEG_161.045_0.752	161.045	0.752	L-Sorbose	91.14	C6H12O6	Organic oxygen compounds	Organooxygen compounds	HMDB0001266	C08356	NA	2-Hydroxyadipic acid;3-Hydroxyadipic acid;3-Hydroxymethylglutaric acid;2(R)-Hydroxyadipic acid;Levoglucosan;D-1-Deoxy-erythro-hexo-2,3-diulose;Diethyl dicarbonate;(-)-1-Methylpropyl 1-propenyl disulfide;D-1,5-Anhydrofructose;2-Hydroxy-2-ethylsuccinic acid;2,5-Anhydro-D-mannose;3-Deoxyglucosone;(2S)-2-[(2S,3S,4R)-3,4-Dihydroxyoxolan-2-yl]-2-hydroxyacetaldehyde;2-(2-Hydroxy-1-oxopropoxy)propionic a…	3.3232e+07	2.8269e+07	2.59634e+07	2.78509e+07	2.63909e+07	2.6508e+07	3.50375e+07	2.79702e+07	2.39398e+07	3.11055e+07	2.97644e+07	2.67518e+07	2.55938e+07	2.76426e+07	2.01757e+07	1.98186e+07	1.76423e+07	2.32975e+07	2.12864e+07	1.96984e+07	2.1498e+07	2.18586e+07	2.05886e+07	2.53483e+07	2.03119e+07	1.77652e+07	2.14857e+07	2.15718e+07	2.45845e+07	2.82871e+07	2.08819e+07	1.3546	up	1.76606e-08	3.85406e-06	1.35359	yes
POS	POS_188.07_5.2344	188.07	5.2344	L-Tryptophan	81.43	NA	NA	NA	HMDB0000929	C00078	map00260(Glycine, serine and threonine metabolism);map00380(Tryptophan metabolism);map00400(Phenylalanine, tyrosine and tryptophan biosynthesis);map00404(Staurosporine biosynthesis);map00901(Indole alkaloid biosynthesis);map00966(Glucosinolate biosynthesis);map00970(Aminoacyl-tRNA biosynthesis);map00996(Biosynthesis of various alkaloids);map00997(Biosynthesis of various other secondary metabolite…	6-Chloro-N-(1-methylethyl)-1,3,5-triazine-2,4-diamine;6-Fluoropyridoxol;Triethanolamine;3-Pyridinebutanoic acid;Benzocaine;Norsalsolinol;Gentiatibetine;Ethyl 2-aminobenzoate;Methyl N-methylanthranilate;Benzyl glycinate;4-Hydroxy-1-(3-pyridinyl)-1-butanone;5-(3-Pyridyl)-2-hydroxytetrahydrofuran;1-Isopropyl-4-nitrobenzene;(3,5-Dimethylphenyl)carbamic acid;2-Amino-3-(4-hydroxyphenyl)propanal;Ethenza…	479330	234695	167460	328858	424981	175932	261712	245727	281020	147395	136064	280577	134315	156845	77815	144146	90008.8	181322	108013	237718	292189	201385	128459	107201	165525	117294	106997	127909	197889	246779	148999	1.6563	up	0.00290627	0.0337058	1.37244	yes
NEG	NEG_409.236_6.5241	409.236	6.5241	LPA 16:0	79.64	C19H39O7P	Lipids and lipid-like molecules	Glycerophospholipids	NA	NA	NA	LysoPA(0:0/16:0);LysoPA(16:0/0:0);Vesatolimod;Quinestrol	3.3468e+06	214042	239216	694565	210418	608989	335574	317213	198317	151741	179653	198811	253765	190873	1.41264e+06	847385	1.32319e+06	1.20926e+06	1.67823e+06	1.20578e+06	1.20489e+06	1.14295e+06	1.221e+06	1.21008e+06	945642	944566	827961	1.20158e+06	839826	509999	1.16965e+06	0.436	down	3.84724e-05	0.00152879	2.70787	yes
NEG	NEG_540.331_6.6064	540.331	6.6064	LPC 15:0	86.58	C23H48NO7P	Lipids and lipid-like molecules	Glycerophospholipids	NA	NA	NA	LysoPC(16:0/0:0);LysoPC(0:0/16:0);1-Nonadecanoyl-glycero-3-phosphoethanolamine;1-Palmitoylphosphatidylcholine;LysoPC(15:0/0:0);LysoPE(0:0/18:0);LysoPE(18:0/0:0);Palmitoyl Ara-C	1.13788e+07	8.29002e+06	1.41315e+07	7.84202e+06	1.56446e+07	1.05713e+07	1.53905e+07	2.18428e+07	9.01383e+06	1.65321e+07	8.14148e+06	1.88324e+07	1.45835e+07	2.18827e+07	1.92267e+07	1.52714e+07	1.51984e+07	2.02735e+07	2.63919e+07	2.06672e+07	2.75371e+07	1.90924e+07	3.71737e+07	1.81145e+07	3.02413e+07	1.4648e+07	2.01169e+07	2.35921e+07	1.79151e+07	1.38627e+07	2.19675e+07	0.6311	down	0.000527399	0.0103246	1.45597	yes
POS	POS_480.307_6.3361	480.307	6.3361	LPC 15:1-SN1	82.14	C23H46NO7P	Lipids and lipid-like molecules	Glycerophospholipids	NA	NA	NA	LysoPE(0:0/18:1(11Z));LysoPE(0:0/18:1(9Z));LysoPE(18:1(11Z)/0:0);LysoPE(18:1(9Z)/0:0);3-Hydroxy-11Z-octadecenoylcarnitine;3-Hydroxy-9Z-octadecenoylcarnitine;(9Z)-3-Hydroxyoctadecenoylcarnitine;(12E)-9-Hydroxyoctadecenoylcarnitine;(12Z)-10-Hydroxyoctadecenoylcarnitine;(9Z)-12-Hydroxyoctadec-9-enoylcarnitine;3-Oxooctadecanoylcarnitine;hydroxyoctadecenoylcarnitine;1-(11Z,14Z-eicosadienoyl)-glycero-3…	1.04447e+06	894100	530127	1.18793e+06	748498	401263	809176	1.65049e+06	863304	646150	321907	1.01842e+06	1.03529e+06	1.19189e+06	839647	1.5046e+06	1.80782e+06	845865	942542	1.58846e+06	1.09729e+06	996713	2.65682e+06	1.25636e+06	931329	821215	1.15782e+06	1.51943e+06	1.08246e+06	881643	1.28328e+06	0.687	down	0.0138398	0.102787	1.17274	yes
NEG	NEG_568.362_7.3207	568.362	7.3207	LPC 17:0	86.58	C25H52NO7P	Lipids and lipid-like molecules	Glycerophospholipids	NA	NA	NA	Tenofovir exalidex;LysoPC(18:0/0:0);LysoPC(0:0/18:0);Platelet-activating factor;2-Lysophosphatidylcholine;LysoPE(0:0/20:0);LysoPE(20:0/0:0);LysoPC(17:0/0:0)	1.84028e+07	2.32318e+07	3.56876e+07	1.31523e+07	3.53233e+07	2.69506e+07	2.92826e+07	6.26112e+07	2.23182e+07	3.38197e+07	2.46195e+07	5.48232e+07	4.09305e+07	5.0173e+07	5.22604e+07	5.56033e+07	4.6653e+07	7.09801e+07	1.07253e+08	6.89614e+07	6.27056e+07	5.86533e+07	1.0115e+08	5.20618e+07	6.23592e+07	5.11932e+07	4.52486e+07	6.62243e+07	4.90226e+07	3.36662e+07	6.43791e+07	0.5229	down	3.75705e-05	0.00150192	1.87668	yes
POS	POS_510.355_7.307	510.355	7.307	LPC 17:0-SN1	81.09	C25H52NO7P	Lipids and lipid-like molecules	Glycerophospholipids	NA	NA	NA	LysoPE(0:0/20:0);LysoPE(20:0/0:0);LysoPC(17:0/0:0);3-Hydroxyeicosanoylcarnitine;2-Hydroxyicosanoylcarnitine;12-Hydroxyicosanoylcarnitine;15-Hydroxyicosanoylcarnitine;1-(11Z-docosenoyl)-glycero-3-phosphate;LysoPA(22:1(13Z)/0:0);N,N'-Di-1,2,3,4-Tetrahydroacridin-9-Ylheptane-1,7-Diamine	1.81083e+08	1.63363e+08	2.34447e+08	1.05275e+08	3.15818e+08	1.8894e+08	1.93284e+08	3.31638e+08	1.40094e+08	2.5576e+08	1.38818e+08	2.69112e+08	2.57634e+08	2.89025e+08	2.54098e+08	2.78135e+08	2.97219e+08	3.99754e+08	5.17388e+08	3.25796e+08	3.85602e+08	3.19161e+08	5.04318e+08	2.60611e+08	3.27765e+08	2.10405e+08	3.4305e+08	1.96964e+08	2.74448e+08	2.18878e+08	3.30019e+08	0.6632	down	0.00153956	0.0215567	1.31382	yes
POS	POS_592.337_6.8325	592.337	6.8325	LPC 22:5	74.41	C30H52NO7P	Lipids and lipid-like molecules	Glycerophospholipids	NA	NA	NA	LysoPC(22:5(4Z,7Z,10Z,13Z,16Z)/0:0);LysoPC(22:5(7Z,10Z,13Z,16Z,19Z)/0:0);Janthitrem C	6.43505e+06	2.43099e+06	2.83764e+06	3.20765e+06	1.99502e+06	2.06005e+06	3.47269e+06	1.48132e+06	1.91532e+06	1.58152e+06	2.40062e+06	2.77476e+06	2.04518e+06	2.52817e+06	1.53303e+06	622643	1.96216e+06	1.47947e+06	3.08147e+06	2.42246e+06	1.00547e+06	2.60771e+06	2.04825e+06	1.64982e+06	1.77031e+06	956104	1.79037e+06	2.20877e+06	2.22514e+06	2.65471e+06	1.79557e+06	1.4785	up	0.0151177	0.109217	1.12571	yes
POS	POS_468.344_6.7738	468.344	6.7738	LPC O-15:0	98.91	C23H50NO6P	Lipids and lipid-like molecules	Glycerophospholipids	NA	NA	NA	NA	3.83065e+06	362066	2.94927e+06	605254	1.38175e+06	1.83611e+06	687762	3.78064e+06	1.5345e+06	1.31486e+06	605859	5.00232e+06	706014	535246	1.47029e+06	3.05395e+06	1.94543e+06	1.89111e+06	4.64963e+06	1.55253e+06	3.09067e+06	2.4421e+06	2.62207e+06	2.06631e+06	2.57705e+06	2.24329e+06	1.6368e+06	2.07566e+06	2.08747e+06	1.79516e+06	2.37978e+06	0.7543	down	0.0332378	0.183529	1.35123	yes
NEG	NEG_540.366_7.1735	540.366	7.1735	LPC O-16:0	83.2	C24H52NO6P	Lipids and lipid-like molecules	Glycerophospholipids	NA	NA	NA	N(4)-Octadecyl-1-arabinofuranosylcytosine;1-O-Hexadecyl-sn-glycero-3-phosphocholine	1.53734e+07	1.35648e+07	3.07237e+07	1.12089e+07	2.68394e+07	1.54959e+07	2.30622e+07	3.63606e+07	2.46373e+07	1.43909e+07	1.64372e+07	3.07257e+07	1.94843e+07	2.22338e+07	3.32509e+07	4.34019e+07	3.35229e+07	3.23431e+07	4.48162e+07	3.23593e+07	3.36216e+07	3.32269e+07	2.97331e+07	2.85011e+07	3.25048e+07	3.39428e+07	2.69782e+07	3.66549e+07	2.76927e+07	2.1467e+07	3.39184e+07	0.6329	down	0.00012338	0.00375843	1.57563	yes
NEG	NEG_538.351_7.1681	538.351	7.1681	LPC O-16:1	80.35	C24H50NO6P	Lipids and lipid-like molecules	Glycerophospholipids	NA	NA	NA	Chenodeoxycholylphenylalanine;Deoxycholylphenylalanine;N(4)-Oleylcytosine arabinoside;LysoPC(P-16:0/0:0)	1.7716e+07	1.74405e+07	3.60796e+07	1.90596e+07	3.577e+07	1.64457e+07	2.44587e+07	3.9961e+07	2.53062e+07	1.67916e+07	1.92179e+07	3.06229e+07	2.79182e+07	2.74857e+07	4.72464e+07	4.11674e+07	4.28807e+07	3.22761e+07	4.92109e+07	3.27862e+07	4.1808e+07	4.00399e+07	3.48457e+07	3.32204e+07	3.21623e+07	2.7861e+07	3.12218e+07	4.28094e+07	3.15646e+07	2.53052e+07	3.7824e+07	0.669	down	0.000185523	0.00500949	1.4242	yes
POS	POS_494.359_7.4418	494.359	7.4418	LPC O-17:1	94.2	C25H52NO6P	Lipids and lipid-like molecules	Glycerophospholipids	NA	NA	NA	N(4)-Oleylcytosine arabinoside;Arachidyl carnitine;9-methylnonadecanoylcarnitine;10-methylnonadecanoylcarnitine;14-methylnonadecanoylcarnitine;12-methylnonadecanoylcarnitine;7-methylnonadecanoylcarnitine;6-methylnonadecanoylcarnitine;13-methylnonadecanoylcarnitine;8-methylnonadecanoylcarnitine;16-methylnonadecanoylcarnitine;5-methylnonadecanoylcarnitine;11-methylnonadecanoylcarnitine;15-methylnon…	783685	1.5533e+06	5.66514e+06	1.93604e+06	2.96111e+06	1.32886e+06	1.69504e+06	6.37529e+06	3.2236e+06	2.50256e+06	2.17052e+06	4.20405e+06	2.60521e+06	681386	7.31473e+06	7.25482e+06	5.13481e+06	3.17272e+06	1.31969e+07	3.80176e+06	7.26449e+06	1.29231e+07	6.30068e+06	3.73627e+06	5.79071e+06	4.27296e+06	4.74856e+06	6.94704e+06	4.62662e+06	2.69184e+06	6.56139e+06	0.4103	down	9.9259e-05	0.00316109	2.17858	yes
NEG	NEG_566.383_7.3618	566.383	7.3618	LPC O-18:1	86.83	C26H54NO6P	Lipids and lipid-like molecules	Glycerophospholipids	NA	NA	NA	LysoPC(P-18:0/0:0)	1.31927e+07	1.08823e+07	1.14092e+07	1.08004e+07	1.76297e+07	1.2259e+07	1.47044e+07	1.67133e+07	1.19042e+07	9.80091e+06	1.16248e+07	1.43578e+07	1.50099e+07	1.89164e+07	2.6026e+07	2.64527e+07	2.22679e+07	2.26469e+07	2.66921e+07	2.30958e+07	1.91531e+07	2.04316e+07	1.76687e+07	2.06099e+07	1.84744e+07	2.20152e+07	1.95756e+07	2.3307e+07	1.77722e+07	1.35146e+07	2.20298e+07	0.6135	down	8.06426e-08	1.26296e-05	1.7418	yes
POS	POS_508.375_8.0177	508.375	8.0177	LPC O-18:1	84.65	C26H54NO6P	Lipids and lipid-like molecules	Glycerophospholipids	NA	NA	NA	LysoPC(P-18:0/0:0);10-Methylicosanoylcarnitine;19-Methylicosanoylcarnitine;13-Methylicosanoylcarnitine;9-Methylicosanoylcarnitine;17-Methylicosanoylcarnitine;16-Methylicosanoylcarnitine;8-Methylicosanoylcarnitine;7-Methylicosanoylcarnitine;6-Methylicosanoylcarnitine;12-Methylicosanoylcarnitine;3-Methylicosanoylcarnitine;4-Methylicosanoylcarnitine;14-Methylicosanoylcarnitine;18-Methylicosanoylcarn…	5.04429e+06	1.294e+07	2.23049e+07	1.22366e+07	1.87899e+07	1.03128e+07	1.032e+07	2.18283e+07	1.42711e+07	1.27672e+07	1.23163e+07	1.44731e+07	1.12541e+07	1.15548e+07	2.50909e+07	1.73384e+07	2.20717e+07	1.52489e+07	3.36976e+07	1.59878e+07	2.31063e+07	2.111e+07	1.81577e+07	1.41712e+07	1.54485e+07	1.9607e+07	1.50264e+07	1.86973e+07	1.66133e+07	1.3601e+07	1.96257e+07	0.693	down	0.00268518	0.0320296	1.24216	yes
NEG	NEG_564.367_7.3444	564.367	7.3444	LPC O-18:2	81.56	C26H52NO6P	Lipids and lipid-like molecules	Glycerophospholipids	NA	NA	NA	Cholylcitrulline;1,2-Didecanoyl-sn-glycero-3-phosphocholine;Rocuronium;LysoPC(P-18:1(9Z)/0:0)	1.65878e+06	1.96769e+06	3.25175e+06	3.15829e+06	2.93083e+06	2.08017e+06	2.7563e+06	4.77835e+06	2.36467e+06	1.76763e+06	2.40058e+06	3.65853e+06	3.11195e+06	3.09937e+06	7.2587e+06	6.14923e+06	6.825e+06	3.51458e+06	6.59126e+06	4.42374e+06	5.21607e+06	4.94029e+06	4.30775e+06	5.17991e+06	4.05834e+06	4.17965e+06	3.61771e+06	5.39643e+06	3.95156e+06	2.78464e+06	5.11848e+06	0.544	down	1.85824e-06	0.000171784	1.84312	yes
POS	POS_506.358_7.3348	506.358	7.3348	LPC O-18:2	94.27	C26H52NO6P	Lipids and lipid-like molecules	Glycerophospholipids	NA	NA	NA	LysoPC(P-18:1(9Z)/0:0);N-Nervonoyl Threonine;7',8'-Dihydro-8'-hydroxycitraniaxanthin	1.67131e+07	1.5215e+07	2.67275e+07	2.62663e+07	2.09739e+07	1.4268e+07	1.45423e+07	2.46275e+07	1.50375e+07	1.22082e+07	1.4512e+07	1.76279e+07	1.64863e+07	1.56334e+07	3.2432e+07	2.9626e+07	3.29406e+07	1.97782e+07	3.37325e+07	2.22543e+07	2.65337e+07	2.56621e+07	2.45661e+07	2.34593e+07	2.11114e+07	2.1816e+07	2.04335e+07	2.53605e+07	2.18052e+07	1.79171e+07	2.56933e+07	0.6973	down	0.000123772	0.00376176	1.33545	yes
POS	POS_534.39_7.5587	534.39	7.5587	LPC O-20:2	93.73	C28H56NO6P	Lipids and lipid-like molecules	Glycerophospholipids	NA	NA	NA	NA	1.12551e+06	1.23672e+06	1.83156e+06	1.15556e+06	3.07352e+06	2.46903e+06	2.40266e+06	2.5924e+06	1.26786e+06	1.21547e+06	2.40345e+06	1.50644e+06	2.33511e+06	2.58193e+06	3.00683e+06	1.25047e+06	2.79651e+06	2.10826e+06	3.09817e+06	3.26504e+06	2.83912e+06	2.6232e+06	3.06875e+06	4.13932e+06	2.53985e+06	3.75065e+06	2.50958e+06	3.74761e+06	2.42645e+06	1.94266e+06	2.91024e+06	0.6675	down	0.00220408	0.0275758	1.30353	yes
NEG	NEG_450.261_6.4467	450.261	6.4467	LPE 16:1	73.86	C21H42NO7P	Lipids and lipid-like molecules	Glycerophospholipids	NA	NA	NA	LysoPE(0:0/16:1(9Z));LysoPE(16:1(9Z)/0:0);Cytochalasin Opho;Dibekacin;Dihydroxylysinonorleucine;Pentadecanedioylcarnitine;Astromicin;N-(4-Methoxyphenyl)-all-trans-retinamide;3-dehydrocholate;N-(4-Hydroxyphenyl)-3,7-dimethyl-9-(2,6,6-trimethyl-1-cyclohexenyl)nona-2,4,6,8-tetraenamide;17-(3-Pyridyl)-5,16-androstadien-3beta-acetate;3-O-Demethylfortimicin A;2-[(3S,8R,9S,10R,13S,14S)-10,13-Dimethyl-17…	1.84751e+07	649491	716917	2.78089e+06	3.37339e+06	1.32525e+06	2.0291e+06	1.02024e+06	1.06694e+06	885895	675213	1.83158e+06	1.75722e+06	1.09753e+07	1.14008e+06	904075	1.7373e+06	1.07696e+06	670864	1.27825e+06	828146	671018	843796	358472	1.04672e+06	882794	685416	1.79889e+06	2.1959e+06	3.39732e+06	994484	3.4162	up	0.0302664	0.173368	1.49162	yes
POS	POS_480.308_7.1047	480.308	7.1047	LPE 18:1	70.01	C23H46NO7P	Lipids and lipid-like molecules	Glycerophospholipids	NA	NA	NA	LysoPE(0:0/18:1(11Z));LysoPE(0:0/18:1(9Z));LysoPE(18:1(11Z)/0:0);LysoPE(18:1(9Z)/0:0);3-Hydroxy-11Z-octadecenoylcarnitine;3-Hydroxy-9Z-octadecenoylcarnitine;(9Z)-3-Hydroxyoctadecenoylcarnitine;(12E)-9-Hydroxyoctadecenoylcarnitine;(12Z)-10-Hydroxyoctadecenoylcarnitine;(9Z)-12-Hydroxyoctadec-9-enoylcarnitine;3-Oxooctadecanoylcarnitine;hydroxyoctadecenoylcarnitine;1-(11Z,14Z-eicosadienoyl)-glycero-3…	2.03193e+08	7.97461e+07	5.49944e+07	1.75516e+08	9.27544e+07	5.761e+07	5.74823e+07	8.04505e+07	3.3166e+07	6.83906e+07	1.09303e+08	6.2349e+07	5.29045e+07	1.13211e+08	3.50629e+07	3.2698e+07	4.31077e+07	3.46786e+07	2.8251e+07	3.22424e+07	4.15422e+07	1.89665e+07	4.36783e+07	2.07031e+07	2.4557e+07	2.65248e+07	3.3652e+07	3.52657e+07	6.04286e+07	8.8648e+07	3.22093e+07	2.7522	up	4.48053e-06	0.000325928	2.24301	yes
POS	POS_476.276_6.3255	476.276	6.3255	LPE 18:3	88.47	C23H42NO7P	Lipids and lipid-like molecules	Glycerophospholipids	NA	NA	NA	LysoPE(0:0/18:3(6Z,9Z,12Z));LysoPE(0:0/18:3(9Z,12Z,15Z));LysoPE(18:3(6Z,9Z,12Z)/0:0);LysoPE(18:3(9Z,12Z,15Z)/0:0);Ulipristal acetate;(9Z,12Z,15Z)-3-Hydroxyoctadecatrienoylcarnitine;(9E,11E,15Z)-9-Hydroxyoctadeca-9,11,15-trienoylcarnitine;(9Z,12Z,15Z)-17-Hydroxyoctadeca-9,12,15-trienoylcarnitine;9-(3,4-Dimethyl-5-propylfuran-2-yl)nonanoylcarnitine;(6Z)-11-(3-Pentyloxiran-2-yl)undeca-6,9-dienoylcar…	3.46672e+07	7.24968e+06	2.06521e+06	1.59541e+07	6.04909e+06	3.31999e+06	5.13835e+06	8.8527e+06	2.86048e+06	6.65304e+06	1.04277e+07	4.20059e+06	5.34601e+06	1.96482e+07	6.42014e+06	1.75572e+06	4.38253e+06	3.20707e+06	1.96727e+06	2.73282e+06	2.2854e+06	1.85257e+06	5.03999e+06	1.41929e+06	1.7587e+06	2.23825e+06	3.08974e+06	2.75544e+06	6.19062e+06	9.45945e+06	2.92178e+06	3.2376	up	0.000579077	0.0110281	2.08238	yes
POS	POS_500.273_6.6441	500.273	6.6441	LPE 20:5	88.47	C25H42NO7P	Lipids and lipid-like molecules	Glycerophospholipids	NA	NA	NA	LysoPE(0:0/20:5(5Z,8Z,11Z,14Z,17Z));LysoPE(20:5(5Z,8Z,11Z,14Z,17Z)/0:0);Osimertinib;(5Z,8Z,10E,14Z,17Z)-12-Hydroxyicosa-5,8,10,14,17-pentaenoylcarnitine;LysoPE(0:0/18:2(9Z,12Z));LysoPE(18:2(9Z,12Z)/0:0);VAPIPROST;1-(4Z,7Z,10Z,13Z,16Z,19Z-docosahexaenoyl)-glycero-3-phosphate;LysoPA(22:6(4Z,7Z,10Z,13Z,16Z,19Z)/0:0)	3.4513e+06	1.87864e+06	1.58115e+06	2.5119e+06	3.43032e+06	1.36788e+06	1.48563e+06	1.56665e+06	2.12696e+06	1.96627e+06	2.09836e+06	622916	1.69284e+06	2.76899e+06	957572	809948	1.53575e+06	1.75644e+06	789798	571795	502983	580588	1.03782e+06	603998	787954	1.02157e+06	950035	875306	1.47612e+06	2.03927e+06	912968	2.2337	up	1.99803e-05	0.000970724	1.99282	yes
NEG	NEG_436.283_7.1356	436.283	7.1356	LPE O-16:1	94.97	C21H44NO6P	Lipids and lipid-like molecules	Glycerophospholipids	NA	NA	NA	LysoPE(P-16:0/0:0);3-hydroxypentadecanoyl carnitine;10-Hydroxypentadecanoylcarnitine;7-Hydroxypentadecanoylcarnitine;9-Hydroxypentadecanoylcarnitine;6-Hydroxypentadecanoylcarnitine;5-Hydroxypentadecanoylcarnitine;Anisperimus	1.4067e+07	1.78728e+07	3.63799e+07	2.07033e+07	2.21458e+07	3.46714e+07	2.32354e+07	3.56507e+07	3.08632e+07	1.83909e+07	2.96801e+07	4.73278e+07	1.67905e+07	1.91466e+07	3.49005e+07	4.23676e+07	3.20163e+07	2.84346e+07	4.0929e+07	3.15593e+07	5.5866e+07	3.4108e+07	2.77328e+07	2.61321e+07	3.40765e+07	3.04823e+07	2.34477e+07	3.94499e+07	3.0301e+07	2.6209e+07	3.4393e+07	0.762	down	0.0124261	0.0951153	1.07352	yes
POS	POS_438.297_7.1233	438.297	7.1233	LPE O-16:1	97.31	C21H44NO6P	Lipids and lipid-like molecules	Glycerophospholipids	NA	NA	NA	LysoPE(P-16:0/0:0);L-Palmitoylcarnitine;O-Palmitoylcarnitine;12-Methylpentadecanoylcarnitine;9-Methylpentadecanoylcarnitine;5-Methylpentadecanoylcarnitine;6-Methylpentadecanoylcarnitine;11-Methylpentadecanoylcarnitine;3-Methylpentadecanoylcarnitine;8-Methylpentadecanoylcarnitine;7-Methylpentadecanoylcarnitine;13-Methylpentadecanoylcarnitine;4-Methylpentadecanoylcarnitine;14-Methylpentadecanoylcar…	1.44721e+07	1.84647e+07	3.74137e+07	1.46991e+07	2.36033e+07	3.50461e+07	2.35799e+07	3.53754e+07	3.52157e+07	1.9456e+07	2.81779e+07	4.24949e+07	1.90407e+07	1.91184e+07	3.25112e+07	4.43214e+07	3.46361e+07	3.00439e+07	3.22132e+07	3.12968e+07	6.13452e+07	3.77789e+07	2.62589e+07	2.61402e+07	3.80609e+07	3.11264e+07	2.64676e+07	3.69614e+07	3.05472e+07	2.61541e+07	3.49402e+07	0.7485	down	0.00984757	0.0805743	1.09564	yes
NEG	NEG_450.299_7.5179	450.299	7.5179	LPE O-17:1	92.41	C22H46NO6P	Lipids and lipid-like molecules	Glycerophospholipids	NA	NA	NA	N-Arachidonoyl Phenylalanine;3-hydroxyhexadecanoyl carnitine;16-Hydroxyhexadecanoylcarnitine;(2S)-2-Hydroxyhexadecanoylcarnitine;5-Hydroxyhexadecanoylcarnitine;7-Hydroxyhexadecanoylcarnitine;8-Hydroxyhexadecanoylcarnitine;9-Hydroxyhexadecanoylcarnitine;10-Hydroxyhexadecanoylcarnitine;11-Hydroxyhexadecanoylcarnitine;12-Hydroxyhexadecanoylcarnitine;13-Hydroxyhexadecanoylcarnitine;6-Hydroxyhexadecan…	332666	996899	3.41489e+06	1.38435e+06	862422	1.11957e+06	1.0592e+06	4.37238e+06	1.28337e+06	897740	1.42427e+06	5.74129e+06	659873	526533	1.96904e+06	2.2424e+06	1.59511e+06	1.56708e+06	4.88339e+06	2.46843e+06	5.16125e+06	4.92977e+06	2.45848e+06	1.4483e+06	3.00771e+06	1.99148e+06	1.55547e+06	3.363e+06	2.23987e+06	1.71968e+06	2.76007e+06	0.6231	down	0.00978476	0.0804206	1.60702	yes
POS	POS_452.313_7.5148	452.313	7.5148	LPE O-17:1	95.07	C22H46NO6P	Lipids and lipid-like molecules	Glycerophospholipids	NA	NA	NA	N-Arachidonoyl Phenylalanine;Heptadecanoyl carnitine;11-MethylHexadecanoylcarnitine;4-MethylHexadecanoylcarnitine;14-MethylHexadecanoylcarnitine;10-MethylHexadecanoylcarnitine;12-MethylHexadecanoylcarnitine;5-MethylHexadecanoylcarnitine;8-MethylHexadecanoylcarnitine;13-MethylHexadecanoylcarnitine;3-MethylHexadecanoylcarnitine;7-MethylHexadecanoylcarnitine;9-MethylHexadecanoylcarnitine;6-MethylHex…	102021	235451	2.52559e+06	209962	948289	374467	416235	2.95562e+06	1.1903e+06	477218	698986	4.25159e+06	274406	480669	1.21957e+06	1.50703e+06	1.90417e+06	1.18019e+06	1.82468e+06	822846	3.03808e+06	2.36811e+06	1.99724e+06	827147	1.39919e+06	1.39499e+06	1.24612e+06	1.90141e+06	1.34898e+06	1.08149e+06	1.61648e+06	0.669	down	0.0100634	0.0818849	1.84411	yes
NEG	NEG_464.314_9.7148	464.314	9.7148	LPE O-18:1	92.19	C23H48NO6P	Lipids and lipid-like molecules	Glycerophospholipids	NA	NA	NA	LysoPE(P-18:0/0:0);3-Hydroxyheptadecanoylcarnitine;10-Hydroxyheptadecanoylcarnitine;11-Hydroxyheptadecanoylcarnitine;12-Hydroxyheptadecanoylcarnitine;N-Oleoyl Histidine	421548	571781	1.61553e+06	466535	940816	866246	589544	1.51302e+06	1.49782e+06	623480	996789	1.47946e+06	778638	592591	1.24009e+06	1.21963e+06	1.38339e+06	950275	1.63928e+06	1.036e+06	2.5273e+06	1.53176e+06	859405	876588	1.64371e+06	1.23536e+06	1.03615e+06	1.60388e+06	1.13345e+06	925271	1.34163e+06	0.6897	down	0.00819805	0.0708192	1.25606	yes
POS	POS_464.313_7.3046	464.313	7.3046	LPE O-18:2	94.8	C23H46NO6P	Lipids and lipid-like molecules	Glycerophospholipids	NA	NA	NA	LysoPE(P-18:1(9Z)/0:0);Oleoylcarnitine;Vaccenyl carnitine;Elaidic carnitine;2-Hydroxyhexadecanoylcarnitine;Octadecenoylcarnitine;Octadec-6-enoylcarnitine;(13Z)-Octadec-13-enoylcarnitine;(7Z)-Octadec-7-enoylcarnitine;3-Octadec-9-enoyloxy-4-(trimethylazaniumyl)butanoate;N-Docosahexaenoyl Isoleucine;N-Docosahexaenoyl Leucine	1.35691e+07	1.18742e+07	2.48351e+07	1.49741e+07	1.6734e+07	2.52849e+07	1.30353e+07	2.32265e+07	2.30165e+07	1.16633e+07	1.79645e+07	3.20554e+07	1.26438e+07	1.33369e+07	2.49814e+07	3.45779e+07	2.85405e+07	2.19638e+07	2.32484e+07	2.06869e+07	3.94303e+07	2.66706e+07	2.04063e+07	1.94059e+07	2.33954e+07	2.27705e+07	2.3733e+07	2.07868e+07	2.16004e+07	1.81581e+07	2.50427e+07	0.7251	down	0.00271376	0.032255	1.20461	yes
POS	POS_462.296_7.09	462.296	7.09	LPE O-18:3	87.18	C23H44NO6P	Lipids and lipid-like molecules	Glycerophospholipids	NA	NA	NA	Z-Leu-Leu-Norvalinal;Verdamicin;O-Linoleoylcarnitine;(10Z,12Z)-octadeca-10,12-dienoylcarnitine;(9Z,11E)-Octadeca-9,11-dienoylcarnitine;(6Z,9Z)-Octadeca-6,9-dienoylcarnitine;(2E,4E)-Octadeca-2,4-dienoylcarnitine;N-[2-(3,4-Dihydroxyphenyl)ethyl]icosa-5,8,11,14-tetraenamide	1.94928e+06	517903	283359	1.4479e+06	828147	464683	466586	752521	187076	301637	942294	264554	98367.4	942296	256253	307222	336456	81613.8	403630	49709.8	486566	82746.1	450458	203680	67692.8	131011	111612	104805	447145	674758	219533	3.0736	up	0.00123711	0.0185664	2.11318	yes
NEG	NEG_483.273_6.4433	483.273	6.4433	LPG 16:0	80.7	C22H45O9P	Lipids and lipid-like molecules	Glycerophospholipids	NA	NA	NA	LysoPG(16:0/0:0);[3-[2,3-Dihydroxypropoxy(hydroxy)phosphoryl]oxy-2-hydroxypropyl] hexadecanoate;(-)-Huperzine A (HupA);LysoPA(0:0/18:0);LysoPA(18:0/0:0);Anordrin;1-heptadecanoyl-glycero-3-phosphate;Camicinal;L-Prolinamide, glycyl-L-prolyl-L-arginyl-;Metapro	2.327e+06	781878	889613	2.49846e+06	1.45614e+06	892526	920036	1.45101e+06	891160	1.17944e+06	1.18308e+06	859677	1.18496e+06	1.22329e+06	830703	743259	1.44217e+06	1.00978e+06	1.16121e+06	1.04262e+06	831448	627902	562565	704686	728914	627712	686815	925273	1.0594e+06	1.26702e+06	851789	1.4875	up	0.00544056	0.0527838	1.15127	yes
NEG	NEG_345.145_5.1146	345.145	5.1146	Lepidine F	96.38	C20H18N4O2	Benzenoids	Benzene and substituted derivatives	HMDB0033094	NA	NA	Laninamivir;3-Hydroxy-6,8-dimethoxy-7(11)-eremophilen-12,8-olide;Valdiate;Glucitol-lysine;N-(4-Amino-2,5-diethoxyphenyl)benzamide;2-trans,-6-trans-farnesyl monophosphate;Cromakalim;EPIISOPILOTURINE;N-[2-(3,5-Dioxopiperazino)propyl]-N-(2-amino-2-oxoethyl)glycine;SCHRADAN	204465	130532	71175.8	118731	42045.4	120351	304089	403713	89673.5	109688	98753.7	365383	307311	182065	407446	481615	865968	550856	921462	258961	396203	287641	291196	874933	599713	563723	624944	374762	358836	181998	535673	0.3398	down	1.03859e-05	0.000603745	2.49892	yes
POS	POS_488.276_5.1247	488.276	5.1247	Leu Ala Arg Glu	87.51	C20H37N7O7	NA	NA	NA	NA	NA	sPLA2 inhibitor;Deoxycholic acid glycine conjugate;Chenodeoxyglycocholic acid;Chenodeoxycholylglycine;Deoxycholylglycine;Glycohyodeoxycholic acid;LysoPC(14:1(9Z)/0:0);N-Eicosapentaenoyl Tyrosine;(2S)-2-Hexylsulfanyl-N-[6-methyl-2,4-bis(methylsulfanyl)pyridin-3-yl]decanamide;N-Methoxysuccinyl-Ala-Ala-Pro-Val	4.25239e+06	7.21812e+06	4.74543e+06	2.21697e+07	1.59237e+06	5.8758e+06	4.20087e+06	2.39944e+06	2.97209e+06	4.18817e+06	4.72376e+06	1.38576e+06	9.07517e+06	5.02412e+06	1.40263e+06	3.37838e+06	2.49932e+06	891868	244239	1.1004e+06	1.75521e+06	1.5512e+06	758131	654017	540046	791335	1.27959e+06	607562	3.47418e+06	5.70166e+06	1.24671e+06	4.5734	up	6.09536e-06	0.000409805	2.77019	yes
NEG	NEG_336.254_8.4448	336.254	8.4448	Linoleoyl glycine	81.04	C20H35NO3	NA	NA	NA	NA	NA	4-(Dodecylamino)Phenol	386178	51485.1	354198	429253	199133	2.44998e+06	118099	486136	754209	326799	46604.1	1.92865e+06	116455	338095	1.78962e+06	906975	847116	1.54064e+06	1.76412e+06	1.2937e+06	308348	781444	1.36088e+06	4.14518e+06	1.66582e+06	1.12894e+06	4.80898e+06	529588	1.10202e+06	570377	1.63367e+06	0.3491	down	0.000846556	0.0141575	2.50006	yes
NEG	NEG_455.247_5.4616	455.247	5.4616	Lucidenolactone	77.13	C27H36O6	Lipids and lipid-like molecules	Prenol lipids	HMDB0030897	NA	NA	Sulfolithocholic acid;Lucidenolactone;Lucidenic acid F;Rhodamine B hydrazide;2,4-Decadienamide,5-(4-methoxyphenyl)-N-[(1R)-1-methyl-4-(3-pyridinyl)butyl]-, (2E,4E)-;Metyrapol;7-Methoxy-1,2,3,4-tetrahydroacridin-9-amine;5-Methoxy-3-(1,2,3,6-tetrahydropyridin-4-yl)-1H-indole;Melengestrol acetate	702529	24965.4	133261	3.36391e+06	1.60301e+06	196945	667803	4.73728e+06	130401	165158	962371	265962	1.72127e+06	32863.4	168742	1.25681e+06	359451	2.48295e+06	7.39192e+06	2.00778e+06	2.78891e+06	430557	1.5215e+06	1.34118e+06	1.52681e+06	1.55066e+06	965028	560552	1.39502e+06	1.05055e+06	1.73949e+06	0.6039	down	0.0434707	0.214168	1.71712	yes
NEG	NEG_455.228_4.7451	455.228	4.7451	Lys Phe Tyr	71.59	C24H32N4O5	NA	NA	NA	NA	NA	N-[(2S)-1-[[(2S)-1-Amino-1-oxopropan-2-yl]amino]-3-naphthalen-2-yl-1-oxopropan-2-yl]-N'-hydroxy-2-(2-methylpropyl)butanediamide;(S)-Menthone 8-thioacetate;(R)-Menthone 8-thioacetate;2-[(4-Hydroxycyclohexyl)amino]-4-(3,6,6-trimethyl-4-oxo-5,7-dihydroindazol-1-yl)benzamide;Forskolin;Isoforskolin;Isopetasoside;Etarotene	187433	217400	253221	192614	33645.3	233142	30246.7	2.07808e+06	69415.2	42424.7	243455	43675.2	848263	627191	88193.1	1.20641e+06	129764	98302.9	53897.2	31403.5	38437.3	22748.1	30176	26398.7	208131	61445.1	19659.1	38280.7	255480	364300	146660	2.484	up	0.0369913	0.193535	1.66149	yes
POS	POS_482.36_7.1602	482.36	7.1602	Lyso-PAF C-16	97.05	C24H52NO6P	Lipids and lipid-like molecules	Glycerophospholipids	NA	NA	NA	1-O-Hexadecyl-sn-glycero-3-phosphocholine	8.31015e+07	7.95326e+07	1.48434e+08	7.50015e+07	1.30856e+08	1.0005e+08	1.1235e+08	1.65158e+08	1.37021e+08	1.00048e+08	9.14546e+07	1.33346e+08	1.03678e+08	1.10428e+08	1.46873e+08	1.93022e+08	1.72383e+08	1.56839e+08	2.05167e+08	1.43076e+08	1.63397e+08	1.56106e+08	1.39332e+08	1.27222e+08	1.55349e+08	1.71525e+08	1.25728e+08	1.61187e+08	1.35274e+08	1.12176e+08	1.58372e+08	0.7083	down	8.32545e-05	0.00277765	1.32782	yes
NEG	NEG_433.236_6.3478	433.236	6.3478	LysoPA(18:2(9Z,12Z)/0:0)	70.25	C21H39O7P	Lipids and lipid-like molecules	Glycerophospholipids	HMDB0007856	C00416	map00561(Glycerolipid metabolism);map00564(Glycerophospholipid metabolism);map01100(Metabolic pathways);map01110(Biosynthesis of secondary metabolites);map04024(cAMP signaling pathway);map04070(Phosphatidylinositol signaling system);map04072(Phospholipase D signaling pathway);map04666(Fc gamma R-mediated phagocytosis);map04912(GnRH signaling pathway);map04975(Fat digestion and absorption);map0520…	LysoPA(0:0/18:2(9Z,12Z));LysoPA(18:2(9Z,12Z)/0:0);Lexibulin;N-Desmethylaminopyrine	2.29675e+06	1.59004e+06	1.27921e+06	1.85115e+06	1.38373e+06	3.09362e+06	1.46344e+06	2.45165e+06	1.61461e+06	1.35562e+06	1.10127e+06	1.33579e+06	1.05001e+06	1.22028e+06	6.28786e+06	4.21978e+06	7.77522e+06	3.8987e+06	5.97441e+06	4.15089e+06	5.04774e+06	4.12871e+06	5.20051e+06	4.72972e+06	3.97391e+06	3.93637e+06	4.08894e+06	6.10602e+06	3.30735e+06	1.64908e+06	4.96563e+06	0.3321	down	1.12749e-10	1.07209e-07	2.69851	yes
NEG	NEG_500.278_6.673	500.278	6.673	LysoPE(0:0/20:4(5Z,8Z,11Z,14Z))	72.58	C25H44NO7P	Lipids and lipid-like molecules	Glycerophospholipids	HMDB0011487	NA	NA	Fexofenadine;LysoPE(0:0/20:4(5Z,8Z,11Z,14Z));LysoPE(0:0/20:4(8Z,11Z,14Z,17Z));LysoPE(20:4(5Z,8Z,11Z,14Z)/0:0);LysoPE(20:4(8Z,11Z,14Z,17Z)/0:0);Glycerophospho-N-Arachidonoyl Ethanolamine;Glycocholic acid;3a,7b,12a-Trihydroxyoxocholanyl-Glycine;Glycohyocholic acid;N-Choloylglycine;Pentanoic acid, 5-(dipentylamino)-5-oxo-4-((3-quinolinylcarbonyl)amino)-, (R)-	8.13803e+07	9.3544e+07	7.62704e+07	1.08103e+08	8.47919e+07	9.84632e+07	9.84499e+07	8.20022e+07	6.36561e+07	7.38652e+07	8.21931e+07	8.99327e+07	7.43623e+07	9.06811e+07	8.69362e+07	5.75954e+07	6.78232e+07	6.02262e+07	5.75976e+07	8.7218e+07	5.14692e+07	4.60355e+07	5.55371e+07	5.32871e+07	5.32546e+07	4.93704e+07	6.34314e+07	7.08377e+07	7.35112e+07	8.55496e+07	6.14728e+07	1.3917	up	2.01915e-05	0.000973873	1.3302	yes
NEG	NEG_478.293_7.1062	478.293	7.1062	LysoPE(18:1(11Z)/0:0)	71.04	C23H46NO7P	Lipids and lipid-like molecules	Glycerophospholipids	HMDB0011505	NA	NA	LysoPE(0:0/18:1(11Z));LysoPE(0:0/18:1(9Z));LysoPE(18:1(11Z)/0:0);LysoPE(18:1(9Z)/0:0);Mofarotene	2.12208e+08	8.47309e+07	5.86796e+07	2.18028e+08	1.2228e+08	6.57562e+07	7.20097e+07	8.91377e+07	4.64023e+07	9.66673e+07	1.17289e+08	8.29723e+07	6.89278e+07	1.39597e+08	4.14221e+07	4.37883e+07	5.88401e+07	4.27874e+07	4.37795e+07	4.654e+07	4.6462e+07	2.16093e+07	5.76378e+07	2.37162e+07	3.54112e+07	2.85526e+07	3.71006e+07	5.23945e+07	7.33831e+07	1.05335e+08	4.14315e+07	2.5424	up	4.74968e-06	0.000339934	2.1558	yes
NEG	NEG_476.277_6.6646	476.277	6.6646	LysoPE(18:2(9Z,12Z)/0:0)	84.49	C23H44NO7P	Lipids and lipid-like molecules	Glycerophospholipids	HMDB0011507	NA	NA	LysoPE(0:0/18:2(9Z,12Z));LysoPE(18:2(9Z,12Z)/0:0);VAPIPROST;Aglepristone	2.49755e+08	1.22218e+08	1.06247e+08	3.23385e+08	2.35202e+08	9.07644e+07	1.09214e+08	2.02193e+08	8.86362e+07	1.32587e+08	1.56479e+08	1.00093e+08	1.11002e+08	1.45554e+08	7.86033e+07	5.56269e+07	1.31126e+08	7.10035e+07	8.20611e+07	5.75328e+07	5.29049e+07	3.72015e+07	7.62509e+07	4.6056e+07	4.98657e+07	5.02496e+07	6.2643e+07	1.13e+08	1.12052e+08	1.55238e+08	6.88661e+07	2.2542	up	9.82029e-06	0.000586223	2.02115	yes
NEG	NEG_506.325_7.8346	506.325	7.8346	LysoPE(20:1(11Z)/0:0)	71.21	C25H50NO7P	Lipids and lipid-like molecules	Glycerophospholipids	HMDB0011512	NA	NA	LysoPE(0:0/20:1(11Z));LysoPE(20:1(11Z)/0:0);Gymnodimine	1.34176e+07	9.09587e+06	3.05318e+06	2.04924e+07	4.06363e+06	2.45319e+06	1.8948e+06	4.78244e+06	1.19246e+06	2.51377e+06	3.34572e+06	3.89175e+06	2.50136e+06	3.64967e+06	1.38273e+06	2.97083e+06	315702	888394	1.05258e+06	3.80946e+06	1.79595e+06	852426	2.26298e+06	1.19132e+06	853899	1.97598e+06	2.14222e+06	1.95446e+06	3.56417e+06	5.45342e+06	1.67492e+06	3.2559	up	0.000700737	0.0124709	2.09273	yes
NEG	NEG_502.294_6.9175	502.294	6.9175	LysoPE(20:3(11Z,14Z,17Z)/0:0)	70.76	C25H46NO7P	Lipids and lipid-like molecules	Glycerophospholipids	HMDB0011514	NA	NA	LysoPE(0:0/20:3(11Z,14Z,17Z));LysoPE(0:0/20:3(5Z,8Z,11Z));LysoPE(0:0/20:3(8Z,11Z,14Z));LysoPE(20:3(11Z,14Z,17Z)/0:0);LysoPE(20:3(5Z,8Z,11Z)/0:0);LysoPE(20:3(8Z,11Z,14Z)/0:0);CCR4 Antagonist	2.88169e+07	7.11143e+06	3.39053e+06	1.41274e+07	1.46948e+07	1.16818e+07	9.79298e+06	4.33394e+06	5.53318e+06	7.31601e+06	6.10327e+06	7.25343e+06	9.19797e+06	1.92627e+07	3.25182e+06	4.07052e+06	5.00174e+06	7.32091e+06	1.92051e+06	8.90123e+06	4.61578e+06	4.53087e+06	4.01522e+06	2.93269e+06	8.01638e+06	3.40812e+06	3.61634e+06	3.52325e+06	7.63363e+06	1.06154e+07	4.65181e+06	2.282	up	0.000778759	0.0134285	1.79767	yes
NEG	NEG_462.298_7.3157	462.298	7.3157	LysoPE(P-18:1(9Z)/0:0)	70.29	C23H46NO6P	Lipids and lipid-like molecules	Glycerophospholipids	HMDB0240599	NA	NA	LysoPE(P-18:1(9Z)/0:0);N-Linoleoyl Histidine	1.13214e+07	1.04588e+07	2.6881e+07	1.94953e+07	1.4174e+07	2.53808e+07	1.16374e+07	2.32391e+07	2.17193e+07	1.18295e+07	1.95866e+07	3.1742e+07	1.13437e+07	1.17576e+07	2.47878e+07	3.42568e+07	2.61959e+07	2.05221e+07	2.52746e+07	2.03762e+07	3.7828e+07	2.42782e+07	1.85314e+07	1.8827e+07	2.23315e+07	2.1907e+07	2.02458e+07	2.18692e+07	2.09928e+07	1.78976e+07	2.4088e+07	0.743	down	0.00821385	0.0708646	1.1465	yes
NEG	NEG_429.3_7.0422	429.3	7.0422	MG(24:6(6Z,9Z,12Z,15Z,18Z,21Z)/0:0/0:0)	70.19	C27H42O4	Lipids and lipid-like molecules	Glycerolipids	HMDB0011590	NA	NA	MG(24:6(6Z,9Z,12Z,15Z,18Z,21Z)/0:0/0:0);7alpha-Hydroxy-3-oxo-4-cholestenoate;Australigenin;Barogenin;Schidigeragenin C;25-Hydroxyvitamin D3-26,23-lactol;24-Oxo-1alpha,25-dihydroxyvitamin D3;(25R)-3beta-hydroxycholest-5-en-7-one-26-oate;Ruscogenin;Nuatigenin;Kuguacin E;Yuccagenin;N-Nonanoylglycine;Ethyl butylacetylaminopropionate;Hexaminolevulinate	1.43794e+07	1.94011e+07	9.13568e+06	1.71072e+07	1.74653e+07	1.46457e+07	1.47157e+07	7.94674e+06	1.51132e+07	1.03863e+07	1.78973e+07	1.40611e+07	1.79265e+07	1.31576e+07	1.35687e+07	9.64229e+06	1.23903e+07	1.65087e+07	8.75987e+06	1.14259e+07	1.01979e+07	1.13418e+07	1.05891e+07	7.95644e+06	1.18254e+07	8.83417e+06	8.87065e+06	9.98706e+06	1.2687e+07	1.45242e+07	1.08499e+07	1.3387	up	0.00421005	0.0440599	1.01956	yes
POS	POS_261.057_1.3441	261.057	1.3441	MLS002695239-01!7-hydroxy-2-phenylchromen-4-one	85.83	C15H10O3	Phenylpropanoids and polyketides	Flavonoids	NA	NA	NA	Suprofen;Tiaprofenic acid;Keto-3-deoxy-D-manno-octulosonic acid;Acefylline;2-Keto-3-Deoxy-D-Mannooctanoic Acid;Furapyrimidone;Rufinamide;3-deoxy-D-manno-octulosonate	3.53387e+06	3.00731e+06	6.02152e+06	2.68369e+06	4.4857e+06	1.97665e+06	2.02917e+06	1.09906e+06	2.85649e+06	4.87128e+06	1.12008e+07	7.96257e+06	2.03458e+06	2.94244e+06	179661	317126	315924	376886	348414	374463	329889	242298	191849	289373	277359	259111	134519	310456	2.16616e+06	4.05037e+06	281952	14.3654	up	2.53854e-11	3.37931e-08	4.12917	yes
POS	POS_336.214_4.9562	336.214	4.9562	MMV024397	72.1	C21H25N3O	Organoheterocyclic compounds	Piperidines	NA	NA	NA	9-Decenoylcarnitine;(4Z)-Decenoylcarnitine;cis-4-Decenoyl carnitine;(6E)-8-Methylnon-6-enoylcarnitine;3-Decenoylcarnitine;6-Decenoylcarnitine;7-Decenoylcarnitine;5-Decenoylcarnitine;2-Decenoylcarnitine;(8Z)-Decenoylcarnitine;Decenoylcarnitine;Ubiquinone-2;Cohulupone;(1(10)E,4E,6a,9b)-9-(2-Methylpropanoyloxy)-1(10),4,11(13)-germacratrien-12,6-olide;Panaquinquecol 6;[8]-Dehydrogingerdione;Ubiquinon…	207880	469454	459202	749672	405695	758597	830521	1.1921e+06	1.40168e+06	935692	522869	1.42702e+06	212439	83359.2	3.71195e+06	747402	2.6543e+06	892853	1.79513e+06	1.10502e+06	644443	926512	599051	1.58417e+06	1.26208e+06	1.17258e+06	1.0835e+06	1.42049e+06	1.04485e+06	689727	1.39996e+06	0.4927	down	0.00429542	0.0445332	1.87392	yes
POS	POS_500.179_5.5152	500.179	5.5152	MMV687246	78.31	C26H25N7O2S	Organoheterocyclic compounds	Quinolines and derivatives	NA	NA	NA	Bitolterol;Furcelleran;5-O-Benzyl 3-O-ethyl 2-methyl-6-phenyl-4-(2-phenylethynyl)-3,4-dihydropyridine-3,5-dicarboxylate;AG 85 (pharmaceutical)	171896	178010	142916	140817	71704.7	104466	107479	161260	80233.2	57791.4	67301.8	191666	279014	87636.8	178933	202232	350827	525490	384296	130971	193307	92733.2	239648	266526	150783	220394	308267	233146	189991	131585	248397	0.5297	down	0.00100943	0.015978	1.62575	yes
POS	POS_321.12_4.7386	321.12	4.7386	MMV687248	97	C18H13FN4O	Organic oxygen compounds	Organooxygen compounds	NA	NA	NA	NA	52592.6	66834.6	66699.1	49822	31996.4	54410	39427.2	58210.9	89856.9	29275.4	26879.3	67635.4	126733	37885.3	50847	54503	154068	87369.9	189597	57718	81754	57025.6	61672.3	43243.7	55840.7	89736.7	233158	92347.1	75255	57018.4	93491.5	0.6099	down	0.0212701	0.137517	1.17838	yes
NEG	NEG_405.176_3.8483	405.176	3.8483	Mammeisin	71.57	C25H26O5	Phenylpropanoids and polyketides	Neoflavonoids	HMDB0034269	C09275	NA	Ocfentanil;Alanylasparagine;Asparaginylalanine;Glutaminylglycine;Glycyl-Glutamine;Glycyl-Gamma-glutamate;(S)-Norfenfluramine;(1R,3S,4S,6R)-6,9-Dihydroxyfenchone 6-O-b-D-glucoside;(1S,3R,4R)-8,10-Dihydroxyfenchone 10-O-b-D-glucoside;Glucosyl 6-hydroxy-2,6-dimethyl-2E,7-octadienoate;Nepetaside;Arginyl-glycyl-aspartic acid	456187	288807	23405	768426	86691.9	359319	378835	501015	6634.98	383880	75999.5	9147.85	356407	21754.6	99058.2	25555.4	134243	14470.4	8244.79	9437.29	32513.2	6094.08	3902.26	11963.6	43413.5	16976.6	8566.26	7222.19	147792	265465	30118.6	8.814	up	0.000840728	0.0141137	2.9072	yes
POS	POS_255.112_5.3669	255.112	5.3669	Melatonin	97	C13H16N2O2	Organoheterocyclic compounds	Indoles and derivatives	HMDB0001389	C01598	map00380(Tryptophan metabolism);map01100(Metabolic pathways);map01110(Biosynthesis of secondary metabolites);map04080(Neuroactive ligand-receptor interaction);map04713(Circadian entrainment)	Nepafenac;10-Hydroxycarbazepine;(R)-MHD;(S)-MHD;3-Deoxypentosone;9-Fluorenylmethyl carbazate;9-Hydroxymethyl-10-carbamoylacridan;Aminoglutethimide;(2E)-2-[[(Z)-3-Phenylbut-2-enyl]hydrazinylidene]propanoic acid;1,1-Diphenylhexatriene;1,6-Diphenyl-1,3,5-hexatriene;N-[2-(5-Methoxy-3H-indol-3-yl)ethyl]acetamide;Ethyl L-tryptophanate;Mofebutazone;Pirmagrel;2-Amino-4-(phosphonomethyl)hept-3-enoic acid;…	110323	97438	19220	88220.5	86277.9	33431.9	123071	240670	202594	13779.2	94397.2	251454	137074	61355.1	487494	755905	601538	423839	745017	378094	376333	333898	417666	753030	291921	293491	442444	599601	302128	111379	492877	0.226	down	3.07512e-06	0.000257459	3.11491	yes
NEG	NEG_280.236_9.7689	280.236	9.7689	Methyl 15-cyanopentadecanoate	76.52	C17H31NO2	Lipids and lipid-like molecules	Fatty Acyls	HMDB0032791	NA	NA	NA	376754	1.15782e+06	1.96474e+06	1.72574e+06	939028	3.28547e+06	1.52672e+06	2.24104e+06	1.58299e+06	1.4251e+06	1.33009e+06	2.82315e+06	1.00017e+06	1.01579e+06	2.88053e+06	1.9564e+06	2.53517e+06	2.21893e+06	2.47854e+06	2.3567e+06	2.05835e+06	2.24459e+06	2.12975e+06	4.39388e+06	2.81609e+06	2.49351e+06	4.41464e+06	1.89944e+06	2.11683e+06	1.59961e+06	2.63404e+06	0.6073	down	0.00173627	0.0232996	1.63175	yes
NEG	NEG_265.217_8.1227	265.217	8.1227	Methyl 2E,4Z-hexadecadienoate	72.68	C17H30O2	Lipids and lipid-like molecules	Fatty Acyls	HMDB0031050	NA	NA	Methyl 2E,4Z-hexadecadienoate;cis-Linoleic acid;Ethyl 3,7,11-trimethyldodeca-2,4-dienoate;Heptadecadienoic acid;N4,N9-Dimethylspermine;N-(3-Aminopropyl)-N'-[3-(dimethylamino)propyl]butane-1,4-diamine;1,1,2-Trimethyl-3,5-bis(1-methylethenyl)cyclohexane;(6E,10E)-2,6,10-Trimethyldodeca-2,6,10-triene;3,7,11-Trimethyldodeca-1,6,10-triene;beta-Muurolene	1.50294e+06	1.75712e+06	3.71854e+06	3.32899e+06	2.49678e+06	8.1607e+06	1.7989e+06	4.32603e+06	4.97651e+06	2.2723e+06	814134	6.57936e+06	981052	770697	8.45563e+06	4.42853e+06	8.13876e+06	5.81452e+06	5.48182e+06	5.19468e+06	3.92427e+06	3.76956e+06	5.06442e+06	1.09809e+07	7.39667e+06	6.85291e+06	1.5803e+07	3.1845e+06	4.92765e+06	3.106e+06	6.7493e+06	0.4602	down	0.000667971	0.0120816	2.10024	yes
NEG	NEG_313.119_4.8698	313.119	4.8698	Methyl 6,7-dimethoxy-4-ethyl-beta-carboline-3-carboxylate	70.13	C17H18N2O4	Organoheterocyclic compounds	Indoles and derivatives	NA	NA	NA	3-[4-(3-Trifluoromethyl-phenyl)-piperazin-1-yl]-dihydrofuran-2-one;Methyl 6,7-dimethoxy-4-ethyl-beta-carboline-3-carboxylate;Molinate;Cyclopropyl-methoxycarbonyl metomidate;Monoethylhexyl phthalic acid;Diisobutyl phthalate;Dibutyl phthalate;Mono(1-ethylhexyl) phthalate;2,5,7,8-Tetramethyl-2-(2'-carboxyethyl)-6-hydroxychroman;Dibutylphthalic acid;Monooctyl phthalate;4-Ethyl-3-hexylphthalic acid;3-…	195621	228792	207521	418256	236658	164939	256918	398287	311411	251707	190916	331317	340455	235918	451515	520818	755796	512199	681951	368097	356746	264060	356073	681785	514713	430383	616142	454973	383356	269194	497518	0.5411	down	7.56752e-06	0.000475183	1.78023	yes
POS	POS_315.235_4.9592	315.235	4.9592	Methyl dehydroabietate	72.46	C21H30O2	NA	NA	NA	NA	NA	Progesterone;7-Dehydropregnenolone;4-Nerolidylcatechol;Cardoltriene;pregn-5-ene-3,20-dione;Pregna-5,16-dien-20-one, 3beta-hydroxy-;3alpha-Hydroxytibolone;delta8-Tetrahydrocannabinol;4-[(1S,6R)-3-Methyl-6-prop-1-en-2-ylcyclohex-2-en-1-yl]-5-pentylbenzene-1,3-diol;Cannabichromene;Cannabidiol;Methyl retinoate;3beta-Hydroxypregna-5,16-dien-20-one	2.36808e+06	9.59728e+06	6.58585e+06	8.49669e+06	6.00644e+06	1.1877e+07	1.10101e+07	1.40469e+07	2.39838e+07	1.14175e+07	6.00982e+06	2.13467e+07	4.06346e+06	2.01351e+06	5.06601e+07	1.43389e+07	4.12013e+07	1.79173e+07	2.3824e+07	1.73104e+07	4.89984e+06	1.35945e+07	8.89313e+06	9.77173e+06	1.98402e+07	8.13472e+06	1.64557e+07	2.22638e+07	1.45689e+07	9.91593e+06	1.92218e+07	0.5159	down	0.0111453	0.0880511	1.66294	yes
NEG	NEG_89.0243_0.8382	89.0243	0.8382	Methyl ethaneperoxoate	78.9	C3H6O3	Organic acids and derivatives	Carboxylic acids and derivatives	NA	NA	NA	L-Lactic acid;Glyceraldehyde;Dihydroxyacetone;Dimethyl carbonate;Monoethyl carbonate;Methoxyacetic acid;1,2,4-Trioxane;1,3,5-Trioxane;Methyl ethaneperoxoate;Acetaldehyde;Polyvinyl alcohol;Ethylene oxide;Formaldehyde;Hydroxycarbene	1.1e+09	5.13146e+08	6.26261e+08	8.02196e+08	4.5894e+08	8.14222e+08	1.06258e+09	9.66219e+08	8.05864e+08	4.50868e+08	6.58031e+08	6.09113e+08	6.56791e+08	5.4063e+08	1.28009e+09	1.50644e+09	1.09675e+09	1.32335e+09	9.60995e+08	9.86886e+08	1.31611e+09	1.12921e+09	1.17037e+09	1.25864e+09	1.2597e+09	1.40789e+09	8.08551e+08	1.17487e+09	9.55168e+08	7.18919e+08	1.19142e+09	0.6034	down	7.63772e-06	0.00047734	1.69871	yes
NEG	NEG_301.119_5.2055	301.119	5.2055	Morin	71.44	C15H10O7	Phenylpropanoids and polyketides	Flavonoids	HMDB0030796	C10105	NA	Humulinic acid A;Adhumulinic acid;Blennin D;Absindiol;(R)-Athanagrandione;Artemin;10-Hydroxymyoporone;(6beta,8betaOH)-6,8-Dihydroxy-7(11)-eremophilen-12,8-olide;3,14-Dihydroxy-11,13-dihydrocostunolide;Arlatin;1alpha,15-Dihydroxymarasmene;3alpha,15-Dihydroxymarasmene;Arabsin;Alkhanol;(1alpha,4alpha,5beta,6alpha,11betaH)-1,4-Epoxy-5-hydroxy-10(14)-germacren-12,6-olide;1alpha-Hydroxyarbusculin A;Spo…	275335	727813	550024	530741	225062	292795	390142	812406	665307	196065	116577	777513	1.58323e+06	336555	797935	660349	2.28913e+06	816856	2.37715e+06	417476	642945	438269	654987	1.29685e+06	859459	814131	2.09367e+06	789603	801014	534255	1.06777e+06	0.5003	down	0.00428941	0.0445056	1.68862	yes
NEG	NEG_247.093_0.6289	247.093	0.6289	Mycorradicin	71.67	C14H16O4	Lipids and lipid-like molecules	Fatty Acyls	NA	NA	NA	Glutamylthreonine;gamma-Glutamylthreonine;TETRAHYDROURIDINE;Hydroxyprolyl-Alanine;Prolyl-Serine;Serylproline;L-Coprine;gamma-Glutamylacetamide;H-Hyp-gly-OH;tetrahydroxybutylimidazole	3.29508e+07	3.42459e+07	3.70444e+07	3.57331e+07	3.61553e+07	3.77515e+07	3.89674e+07	3.13799e+07	4.15583e+07	4.21313e+07	4.05497e+07	3.31679e+07	4.12189e+07	3.38297e+07	2.89871e+07	3.02811e+07	2.66958e+07	2.81065e+07	2.92285e+07	2.91136e+07	2.52558e+07	3.04432e+07	2.55301e+07	2.51275e+07	3.23572e+07	2.83453e+07	2.18509e+07	2.3972e+07	3.22135e+07	3.6906e+07	2.7521e+07	1.341	up	4.68781e-08	8.10443e-06	1.32308	yes
POS	POS_202.216_5.415	202.216	5.415	N,N-Dimethyldecylamine oxide	85.4	C12H27NO	Organic nitrogen compounds	Organonitrogen compounds	NA	NA	NA	2-Dodecanone;2-Methylundecanal;(+/-)-2,4,8-Trimethyl-7-nonen-2-ol;Lauric aldehyde;(2E)-2-dodecen-1-ol	476609	416325	2.04353e+06	345226	499416	296995	639774	790476	229974	387204	735909	239598	314984	356501	333794	292429	254964	234927	265871	382337	250474	279726	270935	445368	205828	261293	192326	301279	419431	555180	283682	1.957	up	0.00697771	0.0631457	1.35869	yes
NEG	NEG_267.196_6.621	267.196	6.621	N-(1,3-Dimethylbutyl)-N'-phenyl-p-phenylenediamine	97	C18H24N2	Organic nitrogen compounds	Organonitrogen compounds	NA	NA	NA	beta-Triticene;alpha-Triticene;Pogostol;Valerianol;10-Epijunenol;(-)-Pacifigorgiol;Sesquisabinene hydrate;4beta-8-Daucen-4-ol;6-Epi-beta-bisabolol;Panasinsanol B;Nerolidol;(S)-Nerolidol;Panasinsanol A;Shyobunol;Rosifoliol;beta-Bisabolol;(-)-Valeranone;Bulnesol;Guaioxide;Carotol;5,8-Epoxydaucane;Isointermedeol;Globulol;Faurinone;alpha-Caryophyllene alcohol;Sesquicineol;Epicubenol;beta-Caryophyllen…	879832	946802	2.12269e+06	1.2424e+06	1.20443e+06	4.16239e+06	943226	930680	2.56226e+06	1.66768e+06	689716	4.90477e+06	697608	1.16415e+06	7.08948e+06	2.2865e+06	3.97001e+06	3.10142e+06	2.52492e+06	3.20328e+06	2.76084e+06	2.67005e+06	2.7673e+06	7.5062e+06	4.2083e+06	2.91866e+06	4.82571e+06	2.53983e+06	2.73183e+06	1.72276e+06	3.74089e+06	0.4605	down	0.000132846	0.00393865	2.09582	yes
POS	POS_238.052_4.0943	238.052	4.0943	N-(2-oxohydropyrimidin-4-yl)benzamide	97	C11H9N3O2	Benzenoids	Benzene and substituted derivatives	NA	NA	NA	NA	162768	24355.5	38751.8	86009.5	133073	2793.22	3224.9	6882.97	8709.66	41173.2	12310.5	23488.5	3171.11	16124	15412.9	1341.23	9260.09	1456.03	4319.65	4488.08	25522.5	11009.9	17239.8	2193.75	1910.3	1676.84	6389.84	39725.9	25170.8	40202.6	10139.1	3.9651	up	0.0203142	0.133608	1.91602	yes
POS	POS_269.124_1.226	269.124	1.226	N-Acetylcarnosine	90.7	C11H16N4O4	Organic acids and derivatives	Peptidomimetics	HMDB0012881	NA	NA	2,3-Dihydroxyvaleric acid;1-Deoxy-D-xylulose;Dihydropteridine;Deoxyribose;(R)-glycerol 1-acetate;2,3-Dihydroxy-2-methylbutanoic acid;1-Aminobenzotriazole;1-Methyl-1H-purine;2,3-Dihydroxypropyl acetate;Glyceryl 2-acetate;1,4-Anhydroribitol;1H-1,2,3-Benzotriazol-4-amine;2-Deoxy-D-ribose;3h-Pteridine;5-Deoxy-D-ribose;9-methyl-9H-purine;Acetylcarnosine;Dexrazoxane;Pentostatin;Hydroxyprolyl-Histidine;…	540671	1.11984e+06	199771	368203	477233	547215	986080	564104	1.26495e+06	472500	1.27475e+06	785072	455230	346007	524603	722298	258604	717299	394739	132051	369447	632099	271174	418410	374502	384547	122038	482011	543052	671545	414559	1.6199	up	0.0299629	0.171965	1.24202	yes
NEG	NEG_390.273_6.6171	390.273	6.6171	N-Arachidonoyl Serine	70.89	C23H37NO4	Organic acids and derivatives	Carboxylic acids and derivatives	NA	NA	NA	NA	17348	91990.4	32564.9	319455	477543	19652.8	88157.7	124969	188924	148860	107164	11577.4	210690	69789	230173	357826	43020.5	279178	195629	201821	913329	99661.2	465605	555604	171636	221675	230936	48320.2	211539	136335	286744	0.4755	down	0.0209019	0.136305	1.82259	yes
NEG	NEG_390.267_6.9425	390.267	6.9425	N-Arachidonoyl-L-Serine	81.37	C23H37NO4	NA	NA	NA	NA	NA	N-Stearoyltaurine;N-Arachidonoyl Serine;N-Myristoyl Tyrosine;Eicosapentaenoyl Ethanolamide;Himbacine;1-Piperidinepropanol, alpha-cyclohexyl-4-(3-hydroxyphenyl)-3,4-dimethyl-;N-(2-Hydroxyethyl)icosa-2,4,6,8,10-pentaenamide	160354	894174	700922	315544	562797	1.53486e+06	2.48276e+06	1.08216e+06	1.39138e+06	1.09742e+06	693451	1.03342e+06	772815	524338	1.13586e+06	1.34341e+06	1.20888e+06	1.66742e+06	1.69105e+06	1.33385e+06	1.14487e+06	1.44585e+06	1.26581e+06	1.14049e+06	1.46426e+06	1.42076e+06	1.44196e+06	2.15617e+06	1.18239e+06	946171	1.41862e+06	0.667	down	0.00798123	0.0694776	1.50779	yes
NEG	NEG_236.093_3.5857	236.093	3.5857	N-Lactoylphenylalanine	71.76	C12H15NO4	Organic acids and derivatives	Carboxylic acids and derivatives	NA	NA	NA	Salsoline-1-carboxylate;3-Hydroxy-carbofuran;N-Lactoylphenylalanine;4-Nitrophenyl hexanoate;6,7-Dimethoxy-1,2,3,4-tetrahydroisoquinoline-3-carboxylic acid;Isopropyl N-acetoxy-N-phenylcarbamate;L-Glutamic acid 5-benzyl ester;5-Methoxytryptophol;(E)-5-(3,4,5,6-Tetrahydro-3-pyridylidenemethyl)-2-furanmethanol;3-(2-Methylperoxyethyl)-1H-indole;5-Hydroxytryptophol;1,2-Dehydrosalsolinol;Plantagonine;2-…	661689	148764	110797	492114	141742	147761	295947	367810	95716.3	108109	190746	116310	246876	147619	109486	189812	74685.6	207464	100660	111803	204229	99270.9	113533	167335	109352	124156	72167	86356.1	180082	233714	126451	1.8483	up	0.0171966	0.119354	1.2445	yes
NEG	NEG_362.236_6.4749	362.236	6.4749	N-Lauroyl Tyrosine	74.94	C21H33NO4	Organic acids and derivatives	Carboxylic acids and derivatives	NA	NA	NA	N-Palmitoyltaurine;N-Lauroyl Tyrosine;Bornaprolol	1.19677e+06	326584	284049	438302	316991	718037	876594	313089	632120	475309	245295	582129	375802	234815	558651	610146	706674	769136	787064	652421	456723	699889	519191	624931	648955	693635	692004	883048	582798	501135	664462	0.7542	down	0.0132478	0.0995791	1.14704	yes
POS	POS_409.306_6.1464	409.306	6.1464	N-Linoleoyl Glutamine	75.35	C23H40N2O4	Organic acids and derivatives	Carboxylic acids and derivatives	NA	NA	NA	N-Linoleoyl Glutamine;1-Phenyl-1,3-eicosanedione;N-Stearoyltaurine;N-Arachidonoyl Serine;N-Myristoyl Tyrosine	112230	110753	104669	86015.8	181330	85362.9	192888	230290	107215	46416.9	141381	96938.5	102011	26528.8	259028	140747	332306	177006	300823	84101.8	47697.2	198082	91319	152355	161071	113120	234356	201534	147056	116002	178110	0.6513	down	0.0458189	0.220354	1.13847	yes
POS	POS_153.066_2.6456	153.066	2.6456	N-Methyl-2-pyridone-5-carboxamide (Nudifloramide)	96.06	C7H8N2O2	Organoheterocyclic compounds	Pyridines and derivatives	NA	NA	NA	N1-Methyl-2-pyridone-5-carboxamide;N1-Methyl-4-pyridone-3-carboxamide;1,3-Benzodioxole-5,6-diamine;2-(Pyridin-2-ylamino)acetic acid;2-Hydroxybenzohydrazide;N-Methyl-4-oxo-1,4-dihydropyridine-3-carboxamide;4-Hydroxybenzohydrazide;Ethyl 2,3-dicyanopropionate;Methyl pyridone carboxamide;N-Methyl-4-nitroaniline;n-methyl-6-oxo-1,6-dihydropyridine-3-carboxamide;1,2-Dihydronaphthalene;Divinylbenzene;1,4…	370122	575741	450782	451815	6.36705e+06	1.09443e+07	8.485e+06	618170	8.23001e+06	3.66534e+06	412078	9.10308e+06	411353	1.96402e+06	514973	1.20188e+07	7.03198e+06	2.01251e+07	7.08331e+06	9.66545e+06	4.99433e+06	7.92888e+06	2.78145e+06	6.86856e+06	351832	6.80934e+06	1.83688e+07	6.77732e+06	5.83461e+06	3.71777e+06	7.95144e+06	0.4676	down	0.027771	0.16293	1.87131	yes
POS	POS_103.123_1.0168	103.123	1.0168	N-Methylputrescine	81.96	C5H14N2	Organic nitrogen compounds	Organonitrogen compounds	HMDB0003661	C02723	map00960(Tropane, piperidine and pyridine alkaloid biosynthesis);map01100(Metabolic pathways);map01110(Biosynthesis of secondary metabolites)	Cadaverine;N-Methylputrescine;2-isopropylaminoethylamine;Piperidine;1-Methylpyrrolidine;Cyclopentylamine	2.82519e+06	1.97308e+06	1.32137e+06	2.28282e+06	2.71376e+06	2.2242e+06	2.47987e+06	1.76598e+06	3.89073e+06	3.70588e+06	3.50426e+06	2.15736e+06	664859	761742	818757	852439	710382	655999	506331	791045	626951	793359	743517	617900	765055	696491	805796	621774	1.50989e+06	2.30508e+06	714700	3.2252	up	3.32943e-06	0.00027052	2.54656	yes
NEG	NEG_298.246_7.086	298.246	7.086	N-Myristoyl Alanine	91.45	C17H33NO3	Organic acids and derivatives	Carboxylic acids and derivatives	NA	NA	NA	NA	2.3737e+06	1.42708e+06	2.84262e+06	9.35389e+06	2.14769e+06	1.16914e+07	1.54394e+06	2.2604e+06	3.58561e+06	1.76284e+06	2.21729e+06	4.05106e+06	820992	905773	4.75452e+06	3.39365e+06	3.75742e+06	4.07725e+06	4.03228e+06	4.02904e+06	5.06787e+06	2.42541e+06	3.39172e+06	8.22553e+06	5.76329e+06	4.67767e+06	7.8853e+06	3.13911e+06	3.98587e+06	3.35602e+06	4.61572e+06	0.7271	down	0.0201861	0.133028	1.40197	yes
NEG	NEG_494.393_9.061	494.393	9.061	N-Nervonoyl Glutamic acid	86.93	C29H53NO5	Organic acids and derivatives	Carboxylic acids and derivatives	NA	NA	NA	NA	6.50661e+06	7.19912e+06	5.30867e+06	5.25099e+06	5.07499e+06	8.02408e+06	7.04168e+06	7.39469e+06	1.11349e+07	5.49975e+06	5.02976e+06	1.68432e+07	5.50139e+06	4.15434e+06	1.12973e+07	1.23259e+07	2.21219e+07	1.40715e+07	1.23647e+07	5.30286e+06	1.04189e+07	6.63137e+06	6.80106e+06	1.09377e+07	7.4178e+06	1.17289e+07	1.27429e+07	8.35742e+06	9.0173e+06	7.1403e+06	1.08943e+07	0.6554	down	0.00467354	0.0473112	1.34008	yes
NEG	NEG_338.269_9.0522	338.269	9.0522	N-Oleoyl Glycine	77.58	C20H37NO3	Organic acids and derivatives	Carboxylic acids and derivatives	NA	NA	NA	Oleoyl glycine;cis-Hydroxy Perhexiline;Monohydroxyperhexiline;Linoleamide	147320	300038	586384	244115	262358	3.00507e+06	295545	201663	983296	311121	196512	2.36185e+06	282011	229624	2.5889e+06	1.1364e+06	1.40898e+06	1.5363e+06	2.64801e+06	1.49064e+06	742380	785383	810528	3.45479e+06	2.36445e+06	1.63453e+06	5.26971e+06	976373	1.2948e+06	671922	1.91767e+06	0.3504	down	0.000101216	0.00320409	2.63527	yes
NEG	NEG_368.28_6.6272	368.28	6.6272	N-Oleoyl-L-Serine	88.44	C21H39NO4	Organic acids and derivatives	Carboxylic acids and derivatives	NA	NA	NA	cis-5-Tetradecenoylcarnitine;(4Z)-Tetradec-4-enoylcarnitine;(7Z)-Tetradec-7-enoylcarnitine;N-Oleoyl-L-Serine;hydroxytetradecadienyl-l-carnitine;Tetradecenoylcarnitine;Linoleoyl ethanolamide;(9E,12E)-N-(2-Hydroxyethyl)octadeca-9,12-dienamide;Dicyclomine	684442	353032	347967	679473	330008	541393	424338	504704	614386	359897	355962	570649	445070	262238	903333	1.08642e+06	955608	742994	989745	544014	567925	558398	714721	677263	662672	731127	870112	1.10924e+06	628112	462397	793827	0.5825	down	1.40275e-05	0.00076218	1.68122	yes
POS	POS_326.305_8.2318	326.305	8.2318	N-Oleoylethanolamine	90.89	C20H39NO2	Organic nitrogen compounds	Organonitrogen compounds	HMDB0002088	NA	NA	2-Aminoethyl oleate;9-Octadecenamide, N-(2-hydroxyethyl)-, (9Z)-;3-dehydrosphinganine (C20);Eicosadienoic acid;Sclareol;8Z,11Z-eicosadienoic acid;11,14-Eicosadienoic acid;Eicosadienic acid;Ethyl linoleate;Methyl sterculate;Icosa-2,6-dienoic acid;Ethyl (Z,Z)-9,12-octadecadienoate	1.08398e+06	44990.5	147972	207444	437814	215808	178155	42277.4	622115	236822	34056.5	526118	318634	324480	832018	682039	914225	630770	475410	462639	281076	435523	589709	609312	823063	770195	729464	490816	469533	315762	623304	0.5066	down	0.00242732	0.0296354	2.10126	yes
POS	POS_189.123_1.2541	189.123	1.2541	N-epsilon-Acetyllysine	79.48	C8H16N2O3	Organic acids and derivatives	Carboxylic acids and derivatives	HMDB0000206	C02727	map00310(Lysine degradation);map01100(Metabolic pathways)	N6-Acetyl-L-lysine;N-alpha-Acetyl-L-lysine;Glycylleucine;Alanylvaline;Glycyl-Isoleucine;Isoleucyl-Glycine;Leucyl-Glycine;N-(3-Amino-3-oxopropyl)-L-valine;alpha-Acetyllysine;DIBOA tetrahexose;N-[(3s)-2-Oxotetrahydrofuran-3-Yl]butanamide;Diethadione	722834	373288	1.31015e+06	1.1339e+06	552987	487445	1.09913e+06	832481	1.43681e+06	636895	1.18051e+06	1.10181e+06	454710	626426	393670	807709	703731	307993	504517	424210	725097	683075	714836	491110	501535	551414	334065	972848	716614	853526	579701	1.4724	up	0.0240439	0.14894	1.10242	yes
POS	POS_599.249_5.1443	599.249	5.1443	NCGC00347662-02_C30H40O11_Methyl 5,6-diacetoxy-10-hydroxy-2,4b,7,7,10a,12a-hexamethyl-12-methylene-1,4,8-trioxohexadecahydro-2H-naphtho[1,2-h]isochromene-2-carboxylate	80.86	C30H40O11	Lipids and lipid-like molecules	Steroids and steroid derivatives	NA	NA	NA	Bafetinib	930016	1.85009e+06	1.59769e+06	1.92737e+06	950176	1.36646e+06	699508	1.0722e+06	985372	656599	507501	1.95878e+06	2.46499e+06	1.15287e+06	2.42118e+06	1.59509e+06	3.88465e+06	1.81363e+06	4.11445e+06	863994	1.50448e+06	789697	1.18888e+06	2.72569e+06	1.91332e+06	1.97915e+06	6.31633e+06	1.93307e+06	1.82726e+06	1.29426e+06	2.36026e+06	0.5484	down	0.012546	0.0958188	1.34562	yes
NEG	NEG_487.087_3.9825	487.087	3.9825	NESS 0327	85.28	C24H23Cl3N4O	NA	NA	NA	NA	NA	Lumacaftor;1,4-Diacetoxy-2,3-dicyanobenzene;(-)-Catechin 3-O-gallate;3-Galloylcatechin;(-)-Epicatechin 3-O-gallate;7-Galloylcatechin;Epicatechin-3-gallate;Theaflavic acid;3-Chloro-2-methyl-N-(4-(2-(4-methylpiperazin-1-yl)-2-oxoethyl)thiazol-2-yl)benzenesulfonamide	530121	296642	123943	358027	294847	167603	392334	219827	457154	84229.1	255065	503973	219418	280801	183788	197738	185940	261853	112043	218440	97173.6	72029.4	154026	89945.5	149823	133056	109491	176299	225915	298856	152975	1.9536	up	0.00161045	0.0221472	1.60452	yes
NEG	NEG_447.083_3.9445	447.083	3.9445	Naringenin-7-O-&#946;-D-Glucuronide	84.45	C21H20O11	NA	NA	NA	NA	NA	Ziprasidone;Mollicellin C;Methyl (1R,2R)-2-ethyl-2,5,7,10-tetrahydroxy-6,11-dioxo-3,4-dihydro-1H-tetracene-1-carboxylate;Peperomin E;1-Hydroxyanthraquinone;7-Methyl-6,8-bis(methylthio)pyrrolo(1,2-a)pyrazine;cis-Mevinphos;4'-Phosphopantothenoylcysteine;Pritelivir;2-[4-Acetamido-3-(4-chlorophenyl)sulfanyl-2-methylindol-1-yl]acetic acid	865534	205338	382656	75403.7	157422	515432	22946.9	140874	273522	68262.2	84024.6	1.18824e+06	658892	86762.8	130878	125343	109580	191754	26938.8	212863	105207	87644.9	70441.1	121154	47164.3	109347	83971.2	61758.1	221763	337522	106003	3.1841	up	0.0382648	0.197972	1.51051	yes
NEG	NEG_227.201_9.7577	227.201	9.7577	Nonyl isovalerate	76.05	C14H28O2	Lipids and lipid-like molecules	Fatty Acyls	HMDB0038034	NA	NA	Myristic acid;2,6,10-Trimethylundecanoic acid;12-Methyltridecanoic acid;Hexanal octane-1,3-diol acetal;Undecanal propyleneglycol acetal;Ethyl dodecanoate;Heptyl heptanoate;Hexyl octanoate;Decyl butanoate;3-Methylbutyl nonanoate;Nonyl isovalerate;Dodecyl acetate;Isobutyl decanoate;10-Methyltridecanoic acid;butyl decanoate;2-Heptanone;4-Heptanone;Ethyl isobutyl ketone;(Z)-4-Hepten-1-ol;2,4-Dimethyl…	1.35772e+06	1.20862e+06	1.51803e+06	1.31889e+06	1.4236e+06	2.17765e+06	1.37078e+06	1.45699e+06	1.96577e+06	1.3042e+06	1.36216e+06	1.84433e+06	1.32879e+06	1.2691e+06	2.06784e+06	1.94697e+06	1.94916e+06	1.80007e+06	2.02097e+06	1.69066e+06	1.90328e+06	4.33464e+06	3.99908e+06	2.47197e+06	2.26963e+06	1.74884e+06	4.38298e+06	1.79551e+06	1.97458e+06	1.49333e+06	2.45583e+06	0.6081	down	0.000316177	0.00738411	1.4363	yes
POS	POS_260.167_5.6084	260.167	5.6084	Norbutorphanol	97	C16H21NO2	Benzenoids	Phenol esters	HMDB0041954	NA	NA	Propranolol;Ramelteon;Norchalciporyl propionate;Norbutorphanol;Nortilidine;Bisphenol B;Dimethyl dimethoxy biphenyl	879750	689876	847008	663670	1.00514e+06	657722	758315	696125	1.14852e+06	796439	1.17202e+06	886972	1.21219e+06	1.65525e+06	620354	551426	558492	548707	532163	752263	528917	523432	434506	375099	770635	863103	765368	594990	767445	933500	601389	1.5522	up	0.000148454	0.00424995	1.40527	yes
POS	POS_184.073_6.2581	184.073	6.2581	O-Phosphocholine	87.69	NA	Organic nitrogen compounds	Organonitrogen compounds	HMDB0001565	C00588	map00552(Teichoic acid biosynthesis);map00564(Glycerophospholipid metabolism);map01100(Metabolic pathways);map05231(Choline metabolism in cancer)	4-Trimethylammoniobutanoic acid;2-Aminoheptanoate;2-Aminoheptanoic acid;[(3-Methylbutyl)amino]acetic acid;4-(3-Hydroxypropyl)morpholine;7-Aminoheptanoic acid;Methyl L-leucinate;(R)-Boschniakine;1-(2,3-Dihydro-1H-pyrrolizin-5-yl)-2-propen-1-one;3-[(5-Methyl-2-furanyl)methyl]-1H-pyrrole;3,4-Dihydro-4-[(5-methyl-2-furanyl)methylene]-2H-pyrrole;3-Nitrobenzaldoxime	1.81249e+07	1.39967e+07	1.86406e+07	1.48331e+07	1.38856e+07	1.43936e+07	1.56901e+07	1.46149e+07	1.5195e+07	1.75107e+07	1.49572e+07	1.43414e+07	1.42696e+07	1.63754e+07	4.943e+06	8.19617e+06	1.28613e+07	1.03323e+07	1.4132e+07	1.65059e+07	7.46894e+06	1.65189e+07	1.56038e+07	1.29431e+07	8.2242e+06	1.00812e+07	1.41442e+07	4.57843e+06	1.33344e+07	1.54878e+07	1.1181e+07	1.3852	up	0.0040497	0.0427175	1.25272	yes
NEG	NEG_209.155_6.8721	209.155	6.8721	Octahydro-2,5,5,8a-tetramethyl-7H-1-benzopyran-7-one	84.56	C13H22O2	Organoheterocyclic compounds	Benzopyrans	HMDB0040232	NA	NA	Linalyl propionate;Methyl (2E,6Z)-dodecadienoate;alpha-Terpineol propanoate;Cepanone;Citral propylene glycol acetal;Propyl 2,4-decadienoate;Tsibulin 1;Isobornyl propionate;Neryl propionate;2-Propenyl cyclohexanebutanoate;Octahydro-2,5,5,8a-tetramethyl-7H-1-benzopyran-7-one;Artemisyl propionate;2-Nonyl-1,4-dioxine;(+/-)-trans- and cis-4,8-Dimethyl-3,7-nonadien-2-yl acetate;Cystophorene;(E)-4,8-Dim…	88039.7	226280	146303	162465	102330	126657	477221	441892	1.10747e+06	174161	113207	478393	61308.1	27959.2	963298	1.17761e+06	1.49953e+06	602022	646213	575244	497049	781518	1.21706e+06	630123	899728	574483	1.39918e+06	485430	560078	266692	853463	0.3125	down	3.73969e-05	0.00149948	2.81944	yes
POS	POS_288.216_4.6265	288.216	4.6265	Octanoylcarnitine - 20.00 eV	90.26	C15H30NO4+	Lipids and lipid-like molecules	Fatty Acyls	NA	NA	NA	3-Methylheptanoylcarnitine;4-Methylheptanoylcarnitine;6-Methylheptanoylcarnitine;5-Methylheptanoylcarnitine;N-Lauroyl Serine;Valproylcarnitine;Ethylene brassylate;5-Hexyl-2-methylpyridine;L-Monomenthyl glutarate	1.50577e+07	2.27534e+07	2.52349e+07	9.85492e+06	1.79782e+07	4.49489e+07	2.75266e+07	1.55803e+07	1.14634e+08	2.01172e+07	8.9149e+06	1.1869e+08	7.2254e+06	4.57425e+06	2.38233e+08	4.97191e+07	1.91453e+08	4.27463e+07	1.31623e+08	6.79677e+07	4.67068e+07	5.64431e+07	2.92328e+07	7.00947e+07	1.11602e+08	7.1875e+07	7.53293e+07	9.05329e+07	6.16661e+07	3.23636e+07	9.09685e+07	0.3558	down	0.000202798	0.00536709	2.53041	yes
NEG	NEG_457.236_6.3557	457.236	6.3557	Oleoyl-L-&#945;-lysophosphatidic acid	81.54	C21H41O7P	NA	NA	NA	NA	NA	1-Lyso-2-arachidonoyl-phosphatidate;1-(5Z,8Z,11Z,14Z-eicosatetraenoyl)-sn-glycero-3-phosphate;LysoPA(20:4(8Z,11Z,14Z,17Z)/0:0);Bis(5-phenylpentyl) benzene-1,2-dicarboxylate;Lovastatin acid;Monoketocholic acid;Cyclohexanecarboxamide, n-[2-[4-(2-methoxyphenyl)-1-piperazinyl]ethyl]-n-2-pyridinyl-;Trandolapril-d5 Diketopiperazine;Mitragynine;Pholcodine;Ramipril Diketopiperazine;(E)-Methyl 2-((2S,3S,1…	503461	543950	420025	438649	346450	1.3669e+06	928261	857647	574357	415737	406839	573968	317221	353904	2.82423e+06	1.58243e+06	2.2968e+06	1.75617e+06	813828	2.20152e+06	1.82158e+06	1.85247e+06	1.59506e+06	2.13486e+06	1.6424e+06	1.50594e+06	1.26e+06	1.90525e+06	1.18714e+06	574812	1.79947e+06	0.3194	down	8.37146e-09	2.14309e-06	2.69879	yes
NEG	NEG_388.252_6.6212	388.252	6.6212	Oleoyltaurine	79.09	C20H39NO4S	Lipids and lipid-like molecules	Fatty Acyls	NA	NA	NA	N-Eicosapentaenoyl Serine;Oleoyltaurine;Hydroxyethyl retinamide	989012	526144	550374	834576	637586	1.87128e+06	1.21289e+06	589624	976715	639412	504520	1.74591e+06	490363	395840	1.16772e+06	1.05387e+06	1.44934e+06	1.43593e+06	1.91491e+06	1.37855e+06	773991	1.06452e+06	2.03785e+06	1.42578e+06	1.37976e+06	1.27422e+06	2.05296e+06	1.79882e+06	1.14902e+06	854589	1.44344e+06	0.592	down	0.00054664	0.0106077	1.66581	yes
NEG	NEG_843.54_8.0778	843.54	8.0778	PA(6 keto-PGF1alpha/22:1(13Z))	73.14	C45H81O12P	Lipids and lipid-like molecules	Glycerophospholipids	NA	NA	NA	PA(22:1(13Z)/6 keto-PGF1alpha);PA(6 keto-PGF1alpha/22:1(13Z));PA(22:1(13Z)/TXB2);PA(TXB2/22:1(13Z));PG(i-19:0/20:4(6Z,8E,10E,14Z)-2OH(5S,12R));PG(20:4(6Z,8E,10E,14Z)-2OH(5S,12R)/i-19:0);PG(i-19:0/20:4(6E,8Z,11Z,13E)-2OH(5S,15S));PG(20:4(6E,8Z,11Z,13E)-2OH(5S,15S)/i-19:0);PG(i-19:0/20:4(8Z,11Z,14Z,17Z)-2OH(5S,6R));PG(20:4(8Z,11Z,14Z,17Z)-2OH(5S,6R)/i-19:0);SM(d18:0/22:6(5Z,8E,10Z,13Z,15E,19Z)-2OH(…	1.70143e+06	2.81659e+06	4.09326e+06	7.72168e+06	4.33724e+06	1.10133e+07	2.91164e+06	610694	3.22126e+06	2.47757e+06	2.28442e+06	1.79871e+06	2.78372e+06	215888	638881	1.77831e+06	2.03186e+06	235508	1.93602e+06	1.91911e+06	2.61503e+06	988740	2.28862e+06	247591	1.92918e+06	534871	1.82675e+06	2.23744e+06	2.47126e+06	3.42767e+06	1.51485e+06	2.2627	up	0.0486631	0.228244	1.4526	yes
POS	POS_716.52_9.7099	716.52	9.7099	PC 13:0_18:2	70.41	C39H74NO8P	Lipids and lipid-like molecules	Glycerophospholipids	NA	NA	NA	PE(14:0/20:2(11Z,14Z));PE(14:1(9Z)/20:1(11Z));PE(16:0/18:2(9Z,12Z));PE(16:1(9Z)/18:1(11Z));PE(16:1(9Z)/18:1(9Z));PE(18:1(11Z)/16:1(9Z));PE(18:1(9Z)/16:1(9Z));PE(18:2(9Z,12Z)/16:0);PE(20:1(11Z)/14:1(9Z));PE(20:2(11Z,14Z)/14:0);PE-NMe(15:0/18:2(9Z,12Z));PE-NMe(18:2(9Z,12Z)/15:0);PE-NMe2(14:1(9Z)/18:1(9Z));PE-NMe2(14:1(9Z)/18:1(11Z));PE-NMe2(16:1(9Z)/16:1(9Z));PE-NMe2(14:0/18:2(9Z,12Z));PE-NMe2(18:1…	4.24798e+06	2.27212e+06	854030	5.11493e+06	473825	1.41452e+06	398714	2.166e+06	208006	4.03038e+06	1.04884e+06	2.10228e+06	7.53537e+06	8.14639e+06	2.99551e+06	5.5293e+06	5.31092e+06	5.20801e+06	5.81475e+06	6.72883e+06	4.33085e+06	2.64559e+06	3.94927e+06	4.20832e+06	3.73552e+06	3.00457e+06	3.36075e+06	1.92895e+06	3.5273e+06	2.8581e+06	4.19651e+06	0.6811	down	0.0204422	0.134185	1.87778	yes
NEG	NEG_818.588_7.2802	818.588	7.2802	PC 16:0_18:1	82.87	C42H82NO8P	Lipids and lipid-like molecules	Glycerophospholipids	NA	NA	NA	PS(18:0/20:0);PS(14:0/24:0);PS(16:0/22:0);PS(20:0/18:0);PS(22:0/16:0);PS(24:0/14:0);PC(18:0/18:1(12Z)-2OH(9,10));PC(18:1(12Z)-2OH(9,10)/18:0);PE(22:1(13Z)/P-18:1(11Z));PE(22:1(13Z)/P-18:1(9Z));PE(22:2(13Z,16Z)/P-18:0);PE(P-18:0/22:2(13Z,16Z));PE(P-18:1(11Z)/22:1(13Z));PE(P-18:1(9Z)/22:1(13Z));PC(15:0/20:1(11Z));PC(20:1(11Z)/15:0);PE(14:0/24:1(15Z));PE(14:1(9Z)/24:0);PE(16:0/22:1(13Z));PE(16:1(9Z)…	9.33645e+06	5.38385e+07	6.1634e+07	3.09466e+07	1.86501e+07	4.55779e+07	6.79478e+07	4.92008e+07	5.32449e+07	5.06804e+07	7.38476e+07	5.03738e+07	5.40887e+07	3.38146e+07	5.90502e+07	1.12138e+08	4.30524e+07	6.78462e+07	1.25004e+08	1.07586e+08	7.09819e+07	7.92982e+07	8.25162e+07	6.6346e+07	8.79765e+07	5.89564e+07	5.54099e+07	2.08699e+08	6.7073e+07	4.66559e+07	8.74901e+07	0.5333	down	0.00159844	0.0220908	1.62325	yes
POS	POS_852.557_8.0356	852.557	8.0356	PC 16:4_26:7	71.61	C50H78NO8P	Lipids and lipid-like molecules	Glycerophospholipids	NA	NA	NA	PC(20:5(5Z,8Z,11Z,14Z,17Z)/22:6(4Z,7Z,10Z,13Z,16Z,19Z));PC(22:6(4Z,7Z,10Z,13Z,16Z,19Z)/20:5(5Z,8Z,11Z,14Z,17Z));PE-NMe(22:5(4Z,7Z,10Z,13Z,16Z)/22:6(4Z,7Z,10Z,13Z,16Z,19Z));PE-NMe(22:6(4Z,7Z,10Z,13Z,16Z,19Z)/22:5(4Z,7Z,10Z,13Z,16Z));PE-NMe(22:6(4Z,7Z,10Z,13Z,16Z,19Z)/22:5(7Z,10Z,13Z,16Z,19Z));PE-NMe(22:5(7Z,10Z,13Z,16Z,19Z)/22:6(4Z,7Z,10Z,13Z,16Z,19Z));PE(20:0/20:3(6,8,11)-OH(5));PE(20:3(6,8,11)-O…	5.44788e+06	2.36505e+06	2.33166e+06	2.71046e+06	5.02446e+06	3.04753e+06	2.48568e+06	1.93853e+06	2.29563e+06	3.29093e+06	2.68566e+06	1.74516e+06	2.72363e+06	4.94307e+06	1.75763e+06	932988	2.41534e+06	1.7644e+06	1.3689e+06	1.88652e+06	2.7347e+06	2.29318e+06	2.18934e+06	1.93192e+06	2.6843e+06	1.95892e+06	2.17459e+06	2.29595e+06	2.55086e+06	3.07395e+06	2.02776e+06	1.5159	up	0.00353522	0.0388612	1.24053	yes
POS	POS_524.37_9.045	524.37	9.045	PC 18:0e	70.81	C26H54NO7P	Lipids and lipid-like molecules	Glycerophospholipids	NA	NA	NA	LysoPC(18:0/0:0);LysoPC(0:0/18:0);Platelet-activating factor;2-Lysophosphatidylcholine;(9Z,12Z,15Z,18Z,21Z)-Tetracosa-9,12,15,18,21-pentaenoylcarnitine;Chenodeoxycholylasparagine;Deoxycholylasparagine;Anadur	7.51302e+06	3.42312e+06	3.11873e+06	3.94386e+06	5.08255e+06	4.16387e+06	3.43087e+06	3.59994e+06	2.47316e+06	3.6111e+06	2.27868e+06	3.34268e+06	4.33323e+06	4.50219e+06	1.01793e+07	4.11511e+06	4.35156e+06	5.21517e+06	5.94414e+06	6.16544e+06	4.61969e+06	4.46426e+06	7.7551e+06	4.3556e+06	4.14847e+06	4.31668e+06	6.10276e+06	4.88476e+06	4.69411e+06	3.9155e+06	5.47272e+06	0.7155	down	0.00357522	0.039075	1.2222	yes
POS	POS_854.571_8.1859	854.571	8.1859	PC 18:5_24:5	70.62	C50H80NO8P	Lipids and lipid-like molecules	Glycerophospholipids	NA	NA	NA	PC(20:4(5Z,8Z,11Z,14Z)/22:6(4Z,7Z,10Z,13Z,16Z,19Z));PC(20:4(8Z,11Z,14Z,17Z)/22:6(4Z,7Z,10Z,13Z,16Z,19Z));PC(20:5(5Z,8Z,11Z,14Z,17Z)/22:5(4Z,7Z,10Z,13Z,16Z));PC(20:5(5Z,8Z,11Z,14Z,17Z)/22:5(7Z,10Z,13Z,16Z,19Z));PC(22:5(4Z,7Z,10Z,13Z,16Z)/20:5(5Z,8Z,11Z,14Z,17Z));PC(22:5(7Z,10Z,13Z,16Z,19Z)/20:5(5Z,8Z,11Z,14Z,17Z));PC(22:6(4Z,7Z,10Z,13Z,16Z,19Z)/20:4(5Z,8Z,11Z,14Z));PC(22:6(4Z,7Z,10Z,13Z,16Z,19Z)/2…	3.36201e+06	452136	683934	1.0121e+06	1.38397e+06	943328	499548	777079	893791	1.69131e+06	552985	1.22473e+06	941612	2.04631e+06	582976	400829	717031	544320	458110	780081	1.30426e+06	458378	411351	214099	1.41697e+06	959072	882151	1.11985e+06	954083	1.17606e+06	732106	1.6064	up	0.0435899	0.214517	1.10357	yes
POS	POS_548.361_6.9318	548.361	6.9318	PC 20:2e	70.6	C28H54NO7P	Lipids and lipid-like molecules	Glycerophospholipids	NA	NA	NA	3-keto Fusidic acid	4.62387e+07	2.10946e+07	1.07892e+07	3.4636e+07	2.7561e+07	4.12095e+07	3.61469e+07	1.36233e+07	1.62013e+07	1.93172e+07	2.26912e+07	2.39879e+07	2.28297e+07	3.17573e+07	9.17272e+06	1.46003e+07	1.5533e+07	2.48538e+07	9.71788e+06	3.00079e+07	1.81682e+07	2.48644e+07	1.98995e+07	1.33779e+07	3.38499e+07	1.61673e+07	1.19284e+07	1.35339e+07	2.22771e+07	2.62917e+07	1.82625e+07	1.4397	up	0.0279602	0.163648	1.05009	yes
POS	POS_516.306_6.1074	516.306	6.1074	PC O-18:4	70.23	C26H46NO7P	Lipids and lipid-like molecules	Glycerophospholipids	NA	NA	NA	LysoPC(18:4(6Z,9Z,12Z,15Z)/0:0);LysoPC(16:1(9Z)/0:0);1-(9Z-Nonadecenoyl)-glycero-3-phosphoethanolamine;(2R)-2-{[(9Z)-Hexadec-9-enoyl]oxy}-3-hydroxypropyl 2-(trimethylazaniumyl)ethyl phosphate;PC(16:1(9E)/0:0)	3.1207e+06	287312	148402	2.64107e+06	1.67511e+07	318734	222937	420302	202763	194961	145486	983562	334087	7.67504e+06	223919	204347	269331	271582	196161	551211	228217	233360	440775	158431	150839	171553	101166	94110.1	1.3122e+06	2.38903e+06	235357	10.1507	up	0.019627	0.130637	1.94135	yes
POS	POS_482.322_6.5966	482.322	6.5966	PC(15:0/0:0)	71.36	C23H49N1O7P1	Lipids and lipid-like molecules	Glycerophospholipids	NA	NA	NA	LysoPC(15:0/0:0);LysoPE(0:0/18:0);LysoPE(18:0/0:0);Palmitoyl Ara-C;12-Hydroxy-12-octadecanoylcarnitine;3-Hydroxyoctadecanoylcarnitine;10-Hydroxyoctadecanoylcarnitine;9-Hydroxyoctadecanoylcarnitine;13-Hydroxyoctadecanoylcarnitine;5-Hydroxyoctadecanoylcarnitine;7-Hydroxyoctadecanoylcarnitine;8-Hydroxyoctadecanoylcarnitine;11-Hydroxyoctadecanoylcarnitine;6-Hydroxyoctadecanoylcarnitine;(2S)-2-Hydroxy…	5.10589e+07	3.72101e+07	7.22541e+07	4.35701e+07	7.50661e+07	4.9401e+07	6.39208e+07	1.12722e+08	4.44625e+07	9.74059e+07	3.42104e+07	8.86563e+07	7.89014e+07	1.16244e+08	9.73761e+07	8.31135e+07	8.64655e+07	1.25998e+08	1.2776e+08	1.10069e+08	1.40137e+08	9.77065e+07	1.44347e+08	8.11088e+07	1.47074e+08	8.30712e+07	1.0606e+08	1.30889e+08	9.02235e+07	6.89345e+07	1.11512e+08	0.6182	down	0.000319108	0.00743953	1.57603	yes
POS	POS_518.322_6.3566	518.322	6.3566	PC(18:3/0:0)	82.12	C26H49N1O7P1	Lipids and lipid-like molecules	Glycerophospholipids	NA	NA	NA	LysoPC(18:3(6Z,9Z,12Z)/0:0);LysoPC(18:3(9Z,12Z,15Z)/0:0);10-(3,4-Dimethyl-5-pentylfuran-2-yl)decanoylcarnitine;11-(5-Butyl-3,4-dimethylfuran-2-yl)undecanoylcarnitine;12-(3,4-Dimethyl-5-propylfuran-2-yl)dodecanoylcarnitine;13-(3-Methyl-5-propylfuran-2-yl)tridecanoylcarnitine;9-(5-Hexyl-3,4-dimethylfuran-2-yl)nonanoylcarnitine;11-(3-Methyl-5-pentylfuran-2-yl)undecanoylcarnitine;LysoPC(16:0/0:0);Lys…	5.03939e+08	1.25913e+08	7.89012e+07	2.50175e+08	1.16901e+08	9.43656e+07	1.07942e+08	1.36797e+08	7.73006e+07	9.90287e+07	1.03588e+08	1.49161e+08	1.20132e+08	3.36023e+08	8.78451e+07	7.28499e+07	1.54303e+08	9.64547e+07	8.51056e+07	1.09929e+08	8.38803e+07	9.44166e+07	2.15235e+08	7.11487e+07	7.95448e+07	7.70964e+07	1.09789e+08	9.09715e+07	1.33169e+08	1.64298e+08	1.02041e+08	1.6101	up	0.0462736	0.221501	1.04152	yes
POS	POS_810.597_9.0618	810.597	9.0618	PC(18:3/20:1)	79.36	C46H85N1O8P1	Lipids and lipid-like molecules	Glycerophospholipids	HMDB0008176	C00157	map00564(Glycerophospholipid metabolism);map00590(Arachidonic acid metabolism);map00591(Linoleic acid metabolism);map00592(alpha-Linolenic acid metabolism);map01100(Metabolic pathways);map01110(Biosynthesis of secondary metabolites);map04723(Retrograde endocannabinoid signaling);map05231(Choline metabolism in cancer)	PC(16:0/22:4(7Z,10Z,13Z,16Z));PC(18:0/20:4(5Z,8Z,11Z,14Z));PC(18:0/20:4(8Z,11Z,14Z,17Z));PC(18:1(11Z)/20:3(5Z,8Z,11Z));PC(18:1(11Z)/20:3(8Z,11Z,14Z));PC(18:1(9Z)/20:3(5Z,8Z,11Z));PC(18:1(9Z)/20:3(8Z,11Z,14Z));PC(18:2(9Z,12Z)/20:2(11Z,14Z));PC(18:3(6Z,9Z,12Z)/20:1(11Z));PC(18:3(9Z,12Z,15Z)/20:1(11Z));PC(18:4(6Z,9Z,12Z,15Z)/20:0);PC(20:0/18:4(6Z,9Z,12Z,15Z));PC(20:1(11Z)/18:3(6Z,9Z,12Z));PC(20:1(11…	1.47948e+08	1.72879e+08	2.07234e+08	1.55018e+08	1.61598e+08	5.10562e+08	1.47602e+08	3.76972e+08	1.90357e+08	1.70541e+08	1.78119e+08	3.89031e+08	6.88051e+07	1.43512e+08	6.19017e+08	3.94736e+08	1.4733e+08	2.17648e+08	2.78558e+08	2.04343e+08	2.19057e+08	1.74262e+08	3.05887e+08	4.71598e+08	5.52246e+08	2.63641e+08	4.99989e+08	1.67008e+08	2.69125e+08	2.15727e+08	3.22523e+08	0.6689	down	0.0319203	0.178873	1.22971	yes
POS	POS_538.385_8.3214	538.385	8.3214	PC(19:0/0:0)	70.59	C27H57N1O7P1	Lipids and lipid-like molecules	Glycerophospholipids	NA	NA	NA	LysoPE(0:0/22:0);LysoPE(22:0/0:0);2-Hydroxydocosanoylcarnitine;LysoPA(24:1(15Z)/0:0);Chenodeoxycholylglutamine;Deoxycholylglutamine	6.92479e+06	5.03864e+06	7.21692e+06	5.35789e+06	1.25202e+07	4.38999e+06	3.4849e+06	7.14509e+06	3.38055e+06	5.54445e+06	4.93031e+06	5.97308e+06	6.60134e+06	6.22388e+06	6.91437e+06	6.04474e+06	7.44637e+06	6.30477e+06	1.19345e+07	9.09533e+06	9.23558e+06	7.27334e+06	1.62308e+07	9.35981e+06	7.15547e+06	6.27593e+06	8.8686e+06	6.94712e+06	7.27924e+06	6.05229e+06	8.50619e+06	0.7115	down	0.00488671	0.0489534	1.18611	yes
POS	POS_760.58_9.0663	760.58	9.0663	PC(20:0/14:1(9Z))	70.37	C42H82NO8P	Lipids and lipid-like molecules	Glycerophospholipids	HMDB0008263	C00157	map00564(Glycerophospholipid metabolism);map00590(Arachidonic acid metabolism);map00591(Linoleic acid metabolism);map00592(alpha-Linolenic acid metabolism);map01100(Metabolic pathways);map01110(Biosynthesis of secondary metabolites);map04723(Retrograde endocannabinoid signaling);map05231(Choline metabolism in cancer)	PC(14:0/20:1(11Z));PC(14:1(9Z)/20:0);PC(16:0/18:1(11Z));PC(16:0/18:1(9Z));PC(16:1(9Z)/18:0);PC(18:0/16:1(9Z));PC(18:1(11Z)/16:0);PC(18:1(9Z)/16:0);PC(20:0/14:1(9Z));PC(20:1(11Z)/14:0);PE(15:0/22:1(13Z));PE(22:1(13Z)/15:0);PE-NMe(18:0/18:1(9Z));PE-NMe(18:0/18:1(11Z));PE-NMe(14:1(9Z)/22:0);PE-NMe(16:0/20:1(11Z));PE-NMe(16:1(9Z)/20:0);PE-NMe(14:0/22:1(13Z));PE-NMe(18:1(11Z)/18:0);PE-NMe(18:1(9Z)/18:…	3.02216e+08	3.79524e+08	3.79656e+08	3.07372e+08	4.33524e+08	1.18236e+09	3.13966e+08	5.37748e+08	5.33336e+08	3.05412e+08	3.22319e+08	8.63122e+08	2.65774e+08	3.48861e+08	9.70085e+08	4.74798e+08	4.47803e+08	8.97347e+08	7.0785e+08	4.74278e+08	7.39216e+08	4.16572e+08	6.00485e+08	1.37055e+09	6.04656e+08	5.79335e+08	1.54121e+09	6.09779e+08	6.03898e+08	4.62514e+08	7.45283e+08	0.6206	down	0.00408855	0.0430251	1.44885	yes
POS	POS_788.608_9.0618	788.608	9.0618	PC(22:0/14:1(9Z))	70.82	C44H86NO8P	Lipids and lipid-like molecules	Glycerophospholipids	HMDB0008526	C00157	map00564(Glycerophospholipid metabolism);map00590(Arachidonic acid metabolism);map00591(Linoleic acid metabolism);map00592(alpha-Linolenic acid metabolism);map01100(Metabolic pathways);map01110(Biosynthesis of secondary metabolites);map04723(Retrograde endocannabinoid signaling);map05231(Choline metabolism in cancer)	NA	1.03109e+08	7.48557e+07	9.9333e+07	6.11235e+07	8.5032e+07	2.55286e+08	7.14339e+07	8.69747e+07	1.10327e+08	7.37241e+07	6.18618e+07	1.19173e+08	6.2513e+07	1.08595e+08	2.29475e+08	3.2787e+08	9.19125e+07	2.38515e+08	2.2566e+08	1.07585e+08	7.61829e+07	1.12077e+08	1.25462e+08	1.10258e+08	2.22436e+08	1.64775e+08	2.82905e+08	1.12318e+08	1.35742e+08	9.80958e+07	1.73388e+08	0.5658	down	0.00211273	0.0269135	1.47136	yes
POS	POS_510.39_8.2581	510.39	8.2581	PC(O-18:0/0:0)	70.38	C26H57N1O6P1	Lipids and lipid-like molecules	Glycerophospholipids	HMDB0011149	C04317	map00565(Ether lipid metabolism);map01100(Metabolic pathways)	LysoPC(O-18:0/0:0)	6.99464e+06	1.29045e+07	1.67996e+07	7.76683e+06	1.80619e+07	1.06704e+07	1.33467e+07	1.92148e+07	1.4381e+07	1.20738e+07	1.48675e+07	2.14512e+07	1.04118e+07	1.52867e+07	1.76331e+07	1.7801e+07	2.24829e+07	1.33541e+07	2.6086e+07	1.72348e+07	2.1316e+07	1.72879e+07	1.88847e+07	1.40441e+07	1.94389e+07	2.25622e+07	1.36255e+07	2.33272e+07	1.64039e+07	1.38737e+07	1.89342e+07	0.7327	down	0.00344943	0.0381702	1.13868	yes
POS	POS_766.572_9.0526	766.572	9.0526	PC(P-18:1(11Z)/18:3(9Z,12Z,15Z))	80.39	C44H80NO7P	Lipids and lipid-like molecules	Glycerophospholipids	HMDB0011279	NA	NA	PC(18:3(6Z,9Z,12Z)/P-18:1(11Z));PC(18:3(6Z,9Z,12Z)/P-18:1(9Z));PC(18:3(9Z,12Z,15Z)/P-18:1(11Z));PC(18:3(9Z,12Z,15Z)/P-18:1(9Z));PC(18:4(6Z,9Z,12Z,15Z)/P-18:0);PC(20:4(5Z,8Z,11Z,14Z)/P-16:0);PC(20:4(8Z,11Z,14Z,17Z)/P-16:0);PC(P-16:0/20:4(5Z,8Z,11Z,14Z));PC(P-16:0/20:4(8Z,11Z,14Z,17Z));PC(P-18:0/18:4(6Z,9Z,12Z,15Z));PC(P-18:1(11Z)/18:3(6Z,9Z,12Z));PC(P-18:1(11Z)/18:3(9Z,12Z,15Z));PC(P-18:1(9Z)/18:3…	4.71362e+06	2.15501e+07	2.30877e+07	1.43473e+07	7.54588e+06	2.98566e+07	2.05503e+07	2.34997e+07	1.72039e+07	1.978e+07	1.67659e+07	3.00794e+07	2.51654e+07	2.59704e+07	7.95773e+07	2.25398e+07	2.59649e+07	3.08467e+07	5.95962e+07	2.24876e+07	3.2072e+07	2.80891e+07	2.84878e+07	6.18315e+07	3.45493e+07	1.94457e+07	8.58748e+07	2.94447e+07	3.0033e+07	2.00083e+07	4.00577e+07	0.4995	down	0.00155213	0.0216355	1.66751	yes
POS	POS_454.291_6.9026	454.291	6.9026	PE O-13:0_3:0	77.62	C21H44NO7P	Lipids and lipid-like molecules	Glycerophospholipids	NA	NA	NA	LysoPE(0:0/16:0);LysoPE(16:0/0:0);Sambutoxin;[3-[2-Aminoethoxy(hydroxy)phosphoryl]oxy-2-hydroxypropyl] hexadecanoate;3-hydroxyhexadecanoyl carnitine;16-Hydroxyhexadecanoylcarnitine;(2S)-2-Hydroxyhexadecanoylcarnitine;5-Hydroxyhexadecanoylcarnitine;7-Hydroxyhexadecanoylcarnitine;8-Hydroxyhexadecanoylcarnitine;9-Hydroxyhexadecanoylcarnitine;10-Hydroxyhexadecanoylcarnitine;11-Hydroxyhexadecanoylcarn…	1.22714e+08	5.66761e+07	6.70113e+07	6.39481e+07	1.11275e+08	5.35743e+07	6.71852e+07	8.64569e+07	3.99119e+07	7.30591e+07	5.79723e+07	8.90838e+07	8.86591e+07	9.84175e+07	6.03946e+07	4.1412e+07	6.14815e+07	4.73534e+07	7.14436e+07	6.66383e+07	5.77731e+07	4.52765e+07	6.06111e+07	3.84205e+07	4.42381e+07	4.05342e+07	5.79286e+07	7.85294e+07	6.59993e+07	7.68532e+07	5.51453e+07	1.3936	up	0.00574999	0.0549095	1.05869	yes
POS	POS_480.297_6.6535	480.297	6.6535	PE O-15:1_3:0	71.37	C23H46NO7P	Lipids and lipid-like molecules	Glycerophospholipids	NA	NA	NA	4alpha-carboxy-4beta-methyl-5alpha-cholesta-8,24-dien-3beta-ol;4alpha-carboxy-ergosta-7,24(241)-dien-3beta-ol;Retinyl beta-glucuronide;Trichomonacid	1.42349e+07	5.45071e+06	4.14848e+06	1.17294e+07	1.26618e+07	4.80338e+06	4.33794e+06	8.19551e+06	3.30787e+06	6.22386e+06	7.23313e+06	3.10227e+06	4.55934e+06	9.46102e+06	2.97233e+06	2.71286e+06	4.24639e+06	3.05956e+06	2.40432e+06	2.40302e+06	2.16885e+06	1.4173e+06	2.76205e+06	1.62304e+06	1.94798e+06	2.82107e+06	2.78589e+06	3.6355e+06	4.87178e+06	7.10354e+06	2.64001e+06	2.6907	up	7.27128e-06	0.00046093	2.20128	yes
NEG	NEG_698.513_9.6949	698.513	9.6949	PE O-16:1_18:2	90.16	C39H74NO7P	Lipids and lipid-like molecules	Glycerophospholipids	NA	NA	NA	PE(16:1(9Z)/P-18:1(11Z));PE(16:1(9Z)/P-18:1(9Z));PE(18:2(9Z,12Z)/P-16:0);PE(P-16:0/18:2(9Z,12Z));PE(P-18:1(11Z)/16:1(9Z));PE(P-18:1(9Z)/16:1(9Z));Cer(d20:1/PGF2alpha);Cer(d20:1/PGE1);Cer(d20:1/PGD1)	1.01079e+06	3.47552e+06	3.89006e+06	2.92687e+06	800458	3.84483e+06	3.2801e+06	3.27829e+06	1.81688e+06	4.24822e+06	3.6867e+06	3.7525e+06	2.85275e+06	5.32766e+06	3.70394e+06	3.54469e+06	3.41877e+06	4.66096e+06	4.66991e+06	3.766e+06	2.59349e+06	4.88887e+06	8.66568e+06	4.7121e+06	2.5747e+06	4.41054e+06	8.55503e+06	5.18628e+06	3.91223e+06	3.15654e+06	4.66792e+06	0.6762	down	0.0201358	0.132923	1.16105	yes
NEG	NEG_474.262_6.3284	474.262	6.3284	PE O-16:3_2:0	71.31	C23H42NO7P	Lipids and lipid-like molecules	Glycerophospholipids	NA	NA	NA	LysoPE(0:0/18:3(6Z,9Z,12Z));LysoPE(0:0/18:3(9Z,12Z,15Z));LysoPE(18:3(6Z,9Z,12Z)/0:0);LysoPE(18:3(9Z,12Z,15Z)/0:0);Ulipristal acetate;Mifepristone;(8S,11R,13R,14S,17S)-11-[4-(Dimethylamino)phenyl]-17-hydroxy-13-methyl-17-prop-1-ynyl-1,2,6,7,8,11,12,14,15,16-decahydrocyclopenta[a]phenanthren-3-one;N-Demethyl Mifepristone	2.15367e+07	3.87937e+06	953349	1.01595e+07	3.46764e+06	1.78995e+06	3.04459e+06	5.83544e+06	1.56864e+06	3.74241e+06	6.03976e+06	2.68968e+06	3.14869e+06	1.16568e+07	3.406e+06	764877	1.97233e+06	1.59825e+06	794047	1.13762e+06	1.02064e+06	625439	2.89976e+06	517818	855828	877495	1.71065e+06	1.16448e+06	3.53064e+06	5.67947e+06	1.3818e+06	4.1102	up	0.000137962	0.00404527	2.40641	yes
POS	POS_504.306_6.8985	504.306	6.8985	PE O-18:3_2:0	70.64	C25H46NO7P	Lipids and lipid-like molecules	Glycerophospholipids	NA	NA	NA	LysoPE(0:0/20:3(11Z,14Z,17Z));LysoPE(0:0/20:3(5Z,8Z,11Z));LysoPE(0:0/20:3(8Z,11Z,14Z));LysoPE(20:3(11Z,14Z,17Z)/0:0);LysoPE(20:3(5Z,8Z,11Z)/0:0);LysoPE(20:3(8Z,11Z,14Z)/0:0);LysoSM(d18:1);(8Z,11Z,13E,15S)-15-Hydroxyicosa-8,11,13-trienoylcarnitine;(8S,9Z,11E,14Z)-8-Hydroxyicosa-9,11,14-trienoylcarnitine;3-Icosa-5,8,11-trienoylcarnitine;3-Icosa-8,11,14-trienoylcarnitine;9-(3,4-Dimethyl-5-pentylfura…	2.74583e+07	6.27741e+06	2.38254e+06	1.12925e+07	1.24721e+07	8.1106e+06	7.59659e+06	3.04548e+06	4.62904e+06	5.47594e+06	5.63763e+06	6.69803e+06	8.80832e+06	2.10854e+07	2.16224e+06	2.84967e+06	3.71171e+06	5.64779e+06	1.76993e+06	6.48716e+06	3.63109e+06	4.02343e+06	3.40606e+06	2.21628e+06	5.49502e+06	3.13424e+06	2.64055e+06	2.82872e+06	6.46335e+06	9.35499e+06	3.57171e+06	2.6192	up	0.000713297	0.0126101	1.91236	yes
POS	POS_500.276_6.3376	500.276	6.3376	PE O-18:5_2:0	88.43	C25H42NO7P	Lipids and lipid-like molecules	Glycerophospholipids	NA	NA	NA	LysoPE(0:0/20:5(5Z,8Z,11Z,14Z,17Z));LysoPE(20:5(5Z,8Z,11Z,14Z,17Z)/0:0);Osimertinib;(5Z,8Z,10E,14Z,17Z)-12-Hydroxyicosa-5,8,10,14,17-pentaenoylcarnitine;LysoPE(0:0/18:2(9Z,12Z));LysoPE(18:2(9Z,12Z)/0:0);VAPIPROST;1-(4Z,7Z,10Z,13Z,16Z,19Z-docosahexaenoyl)-glycero-3-phosphate;LysoPA(22:6(4Z,7Z,10Z,13Z,16Z,19Z)/0:0)	2.41628e+07	3.55111e+06	3.29659e+06	1.2318e+07	3.59025e+06	3.39946e+06	4.3507e+06	1.07982e+07	1.91597e+06	2.80687e+06	2.75801e+06	1.32958e+07	3.33441e+06	8.89681e+06	2.87078e+06	4.18906e+06	2.15674e+06	2.84882e+06	3.05732e+06	4.91554e+06	3.06852e+06	2.6438e+06	3.39968e+06	2.89899e+06	2.45842e+06	3.96899e+06	2.60001e+06	3.77335e+06	5.11875e+06	7.03393e+06	3.20357e+06	2.1956	up	0.0273855	0.161379	1.25121	yes
POS	POS_528.306_6.7957	528.306	6.7957	PE O-18:5_4:0	70.17	C27H46NO7P	Lipids and lipid-like molecules	Glycerophospholipids	NA	NA	NA	LysoPE(0:0/22:5(4Z,7Z,10Z,13Z,16Z));LysoPE(0:0/22:5(7Z,10Z,13Z,16Z,19Z));LysoPE(22:5(4Z,7Z,10Z,13Z,16Z)/0:0);LysoPE(22:5(7Z,10Z,13Z,16Z,19Z)/0:0);Chenodeoxycholylproline;Deoxycholylproline;LysoPE(0:0/20:2(11Z,14Z));LysoPE(20:2(11Z,14Z)/0:0);Bardoxolone methyl;PC(17:2(9Z,12Z)/0:0);(2S,3S,4R)-4-(1,3-Benzodioxol-5-yl)-1-[2-(dibutylamino)-2-oxoethyl]-2-(4-methoxyphenyl)pyrrolidine-3-carboxylic acid	2.58236e+07	5.93844e+06	2.92913e+06	9.28629e+06	7.74698e+06	5.32371e+06	8.29087e+06	4.15531e+06	4.91867e+06	4.29706e+06	4.84919e+06	9.23829e+06	6.12502e+06	1.00726e+07	4.81978e+06	3.09541e+06	5.42052e+06	4.88678e+06	3.95745e+06	5.42091e+06	3.01554e+06	4.13615e+06	3.11121e+06	3.05498e+06	4.02225e+06	3.66247e+06	4.66917e+06	5.98617e+06	6.00907e+06	7.78537e+06	4.23277e+06	1.8393	up	0.00617076	0.057802	1.32816	yes
POS	POS_454.291_4.5471	454.291	4.5471	PE(16:0/0:0)	96.16	C21H44NO7P	Lipids and lipid-like molecules	Glycerophospholipids	HMDB0011503	NA	NA	LysoPE(0:0/16:0);LysoPE(16:0/0:0);Sambutoxin;[3-[2-Aminoethoxy(hydroxy)phosphoryl]oxy-2-hydroxypropyl] hexadecanoate;3-hydroxyhexadecanoyl carnitine;16-Hydroxyhexadecanoylcarnitine;(2S)-2-Hydroxyhexadecanoylcarnitine;5-Hydroxyhexadecanoylcarnitine;7-Hydroxyhexadecanoylcarnitine;8-Hydroxyhexadecanoylcarnitine;9-Hydroxyhexadecanoylcarnitine;10-Hydroxyhexadecanoylcarnitine;11-Hydroxyhexadecanoylcarn…	473265	33661.5	450848	1.30383e+06	213956	311419	610332	3.05272e+06	899854	922219	1.06126e+06	236125	725511	426087	1.38395e+06	1.03949e+06	2.47872e+06	619154	512810	901769	2.03931e+06	614982	1.22503e+06	1.58716e+06	854933	629293	1.18915e+06	810756	950271	765792	1.13475e+06	0.6749	down	0.0368898	0.193261	1.41253	yes
NEG	NEG_714.505_9.6918	714.505	9.6918	PE(16:0/18:2)	73.86	C39H73N1O8P1	Lipids and lipid-like molecules	Glycerophospholipids	HMDB0008928	C00350	map00563(Glycosylphosphatidylinositol (GPI)-anchor biosynthesis);map00564(Glycerophospholipid metabolism);map01100(Metabolic pathways);map01110(Biosynthesis of secondary metabolites);map04136(Autophagy - other);map04138(Autophagy - yeast);map04140(Autophagy - animal);map04723(Retrograde endocannabinoid signaling);map05130(Pathogenic Escherichia coli infection);map05167(Kaposi sarcoma-associated h…	PE(14:0/20:2(11Z,14Z));PE(14:1(9Z)/20:1(11Z));PE(16:0/18:2(9Z,12Z));PE(16:1(9Z)/18:1(11Z));PE(16:1(9Z)/18:1(9Z));PE(18:1(11Z)/16:1(9Z));PE(18:1(9Z)/16:1(9Z));PE(18:2(9Z,12Z)/16:0);PE(20:1(11Z)/14:1(9Z));PE(20:2(11Z,14Z)/14:0);PE-NMe(15:0/18:2(9Z,12Z));PE-NMe(18:2(9Z,12Z)/15:0);PE-NMe2(14:1(9Z)/18:1(9Z));PE-NMe2(14:1(9Z)/18:1(11Z));PE-NMe2(16:1(9Z)/16:1(9Z));PE-NMe2(14:0/18:2(9Z,12Z));PE-NMe2(18:1…	3.07062e+06	5.91008e+06	6.05764e+06	5.80863e+06	3.63642e+06	5.19081e+06	6.22465e+06	5.42445e+06	1.80889e+06	7.38776e+06	1.46347e+07	5.79895e+06	7.75089e+06	1.08715e+07	1.37887e+07	9.2265e+06	9.6628e+06	7.90055e+06	7.99168e+06	1.05508e+07	7.55409e+06	5.61211e+06	7.9789e+06	8.80409e+06	6.57995e+06	5.57688e+06	7.6453e+06	6.98949e+06	7.33706e+06	6.39828e+06	8.27584e+06	0.7731	down	0.0349234	0.188524	1.08975	yes
NEG	NEG_464.279_6.7646	464.279	6.7646	PE(17:1/0:0)	79.72	C22H43N1O7P1	Lipids and lipid-like molecules	Glycerophospholipids	NA	NA	NA	LysoPC(14:1(9Z)/0:0);N-Eicosapentaenoyl Tyrosine;Hexadecanedioic acid mono-L-carnitine ester;N-(4-Methoxyphenyl)-all-trans-retinamide;3-dehydrocholate	492089	88000.6	91239	313078	444591	126697	135798	243669	124389	207432	155483	161641	169948	1.69494e+06	111310	76469.3	152040	297869	102412	55449.9	119526	31659.7	417512	99162.4	215154	28191.1	121120	105415	227939	317785	138092	2.3013	up	0.0256098	0.154575	1.4373	yes
NEG	NEG_504.309_7.2857	504.309	7.2857	PE(20:2/0:0)	71.59	C25H47N1O7P1	Lipids and lipid-like molecules	Glycerophospholipids	NA	NA	NA	LysoPE(0:0/20:2(11Z,14Z));LysoPE(20:2(11Z,14Z)/0:0);Bardoxolone methyl;PC(17:2(9Z,12Z)/0:0)	3.38073e+06	2.06047e+06	1.20911e+06	2.29027e+06	2.78504e+06	1.32034e+06	1.0357e+06	2.12988e+06	902208	704404	1.37634e+06	1.76656e+06	2.79564e+06	2.05897e+06	696731	566759	670855	521150	554872	1.00702e+06	664001	396987	945222	459830	540985	556975	711959	773664	1.24581e+06	1.84398e+06	647644	2.8472	up	9.69564e-07	0.000100218	2.36023	yes
POS	POS_502.292_6.6621	502.292	6.6621	PE(20:4/0:0)	72.08	C25H45N1O7P1	Lipids and lipid-like molecules	Glycerophospholipids	HMDB0011517	NA	NA	Fexofenadine;LysoPE(0:0/20:4(5Z,8Z,11Z,14Z));LysoPE(0:0/20:4(8Z,11Z,14Z,17Z));LysoPE(20:4(5Z,8Z,11Z,14Z)/0:0);LysoPE(20:4(8Z,11Z,14Z,17Z)/0:0);Glycerophospho-N-Arachidonoyl Ethanolamine;3-Hydroxyarachidonoylcarnitine;(5Z,8S,9E,11Z,14Z)-8-Hydroxyicosa-5,9,11,14-tetraenoylcarnitine;(5Z,8Z,10E,12S,14Z)-12-Hydroxyicosa-5,8,10,14-tetraenoylcarnitine;(5E,7Z,11Z,14Z)-9-Hydroxyicosa-5,7,11,14-tetraenoylc…	9.50726e+07	8.82804e+07	7.32399e+07	8.859e+07	8.66695e+07	8.74085e+07	9.34242e+07	8.39793e+07	6.89581e+07	7.40657e+07	8.11975e+07	9.60537e+07	8.53736e+07	8.76558e+07	7.75624e+07	6.22907e+07	7.93541e+07	7.11197e+07	5.69874e+07	9.41205e+07	5.66405e+07	5.03638e+07	4.73986e+07	4.95349e+07	6.19937e+07	4.7335e+07	6.02402e+07	7.49285e+07	7.428e+07	8.49978e+07	6.35621e+07	1.3372	up	0.000113181	0.00352849	1.23326	yes
POS	POS_530.323_7.1602	530.323	7.1602	PE(22:4/0:0)	71.29	C27H49N1O7P1	Lipids and lipid-like molecules	Glycerophospholipids	NA	NA	NA	LysoPE(0:0/22:4(7Z,10Z,13Z,16Z));LysoPE(22:4(7Z,10Z,13Z,16Z)/0:0);(7E,10E,13E,16E)-3-Hydroxydocosa-7,10,13,16-tetraenoylcarnitine;(10E)-11-(3,4-Dimethyl-5-pentylfuran-2-yl)undec-10-enoylcarnitine;11-{3,4-Dimethyl-5-[(1E)-pent-1-en-1-yl]furan-2-yl}undecanoylcarnitine;Chenodeoxycholylvaline;Deoxycholylvaline;LysoPE(0:0/20:1(11Z));LysoPE(20:1(11Z)/0:0);Gymnodimine	2.65828e+06	1.67666e+06	1.76896e+06	1.74588e+06	3.0962e+06	2.19079e+06	2.80622e+06	850409	2.33175e+06	1.31112e+06	2.17911e+06	1.5376e+06	1.76269e+06	5.05694e+06	1.23243e+06	847380	1.7861e+06	2.324e+06	588196	1.39652e+06	861387	1.08896e+06	336163	616481	1.84043e+06	693811	1.06387e+06	1.0677e+06	1.66843e+06	2.21233e+06	1.12453e+06	1.9673	up	0.000546068	0.0106077	1.74709	yes
NEG	NEG_698.513_8.1044	698.513	8.1044	PE(P-16:0/18:2)	85.1	C39H73N1O7P1	Lipids and lipid-like molecules	Glycerophospholipids	HMDB0011343	NA	NA	PE(16:1(9Z)/P-18:1(11Z));PE(16:1(9Z)/P-18:1(9Z));PE(18:2(9Z,12Z)/P-16:0);PE(P-16:0/18:2(9Z,12Z));PE(P-18:1(11Z)/16:1(9Z));PE(P-18:1(9Z)/16:1(9Z));Cer(d20:1/PGF2alpha);Cer(d20:1/PGE1);Cer(d20:1/PGD1)	3.57144e+06	4.20183e+06	5.21104e+06	5.41719e+06	3.92974e+06	6.10853e+06	4.54483e+06	3.98984e+06	6.05678e+06	5.72576e+06	4.16382e+06	4.90767e+06	8.19217e+06	7.76481e+06	5.05156e+06	5.93363e+06	9.75309e+06	7.05741e+06	6.22349e+06	5.29843e+06	6.13547e+06	8.65441e+06	1.25386e+07	6.66664e+06	4.49139e+06	6.49579e+06	1.40658e+07	7.86976e+06	6.42932e+06	5.27039e+06	7.58825e+06	0.6945	down	0.00543548	0.0527838	1.12724	yes
NEG	NEG_746.511_8.2566	746.511	8.2566	PE(P-16:0/22:6)	70.18	C43H73N1O7P1	Lipids and lipid-like molecules	Glycerophospholipids	HMDB0005780	C00350	map00563(Glycosylphosphatidylinositol (GPI)-anchor biosynthesis);map00564(Glycerophospholipid metabolism);map01100(Metabolic pathways);map01110(Biosynthesis of secondary metabolites);map04136(Autophagy - other);map04138(Autophagy - yeast);map04140(Autophagy - animal);map04723(Retrograde endocannabinoid signaling);map05130(Pathogenic Escherichia coli infection);map05167(Kaposi sarcoma-associated h…	PE(P-16:0/22:6(4Z,7Z,10Z,13Z,16Z,19Z));PE(20:5(5Z,8Z,11Z,14Z,17Z)/P-18:1(11Z));PE(20:5(5Z,8Z,11Z,14Z,17Z)/P-18:1(9Z));PE(22:6(4Z,7Z,10Z,13Z,16Z,19Z)/P-16:0);PE(P-18:1(11Z)/20:5(5Z,8Z,11Z,14Z,17Z));PE(P-18:1(9Z)/20:5(5Z,8Z,11Z,14Z,17Z));3-methoxy-4-hydroxy-5-all-trans-octaprenylbenzoate;Soblidotin	2.05224e+07	2.49209e+07	2.33643e+07	2.02807e+07	2.59532e+07	3.15924e+07	3.4826e+07	1.42225e+07	5.28068e+06	1.89716e+07	2.08505e+07	1.58681e+07	1.38832e+07	1.94019e+07	1.72209e+07	1.38162e+07	1.22172e+07	1.33425e+07	1.58847e+07	1.07887e+07	1.63509e+07	1.52826e+07	1.60811e+07	1.06785e+07	1.41686e+07	9.89982e+06	1.21933e+07	1.35565e+07	1.71936e+07	2.07099e+07	1.36772e+07	1.5142	up	0.0162097	0.114717	1.06745	yes
NEG	NEG_769.5_8.1825	769.5	8.1825	PG 36:4	91.79	C42H75O10P	Lipids and lipid-like molecules	Glycerophospholipids	HMDB0116606	NA	NA	PG(16:0/20:4(5Z,8Z,11Z,14Z));PG(16:1(9Z)/20:3(5Z,8Z,11Z));PG(16:1(9Z)/20:3(8Z,11Z,14Z));PG(18:1(11Z)/18:3(6Z,9Z,12Z));PG(18:1(11Z)/18:3(9Z,12Z,15Z));PG(18:1(9Z)/18:3(6Z,9Z,12Z));PG(18:1(9Z)/18:3(9Z,12Z,15Z));PG(18:2(9Z,12Z)/18:2(9Z,12Z));PG(18:3(6Z,9Z,12Z)/18:1(11Z));PG(18:3(6Z,9Z,12Z)/18:1(9Z));PG(18:3(9Z,12Z,15Z)/18:1(11Z));PG(18:3(9Z,12Z,15Z)/18:1(9Z));PG(20:4(5Z,8Z,11Z,14Z)/16:0);PA(19:0/20:4…	1.39438e+07	5.82843e+06	1.11119e+07	2.48094e+07	1.9006e+07	3.63597e+06	3.04407e+06	8.38066e+06	1.46988e+06	7.63762e+06	1.23762e+07	1.43352e+06	2.59558e+06	5.01186e+06	4.06271e+06	1.04105e+06	1.01202e+06	1.58565e+06	676888	1.94513e+06	1.23889e+06	389249	2.23576e+06	800491	375535	565193	1.2332e+06	768829	4.93627e+06	8.59178e+06	1.28076e+06	6.7084	up	4.09317e-06	0.000304404	3.0778	yes
NEG	NEG_745.502_8.2463	745.502	8.2463	PG(16:0/18:2)	75.47	C40H74O10P1	Lipids and lipid-like molecules	Glycerophospholipids	HMDB0010575	NA	NA	PG(16:0/18:2(9Z,12Z));PG(16:1(9Z)/18:1(11Z));PG(16:1(9Z)/18:1(9Z));PG(18:1(11Z)/16:1(9Z));PG(18:1(9Z)/16:1(9Z));PG(18:2(9Z,12Z)/16:0);DG(18:0/6 keto-PGF1alpha/0:0);DG(6 keto-PGF1alpha/18:0/0:0);DG(18:0/0:0/6 keto-PGF1alpha);DG(6 keto-PGF1alpha/0:0/18:0);DG(18:0/TXB2/0:0);DG(TXB2/18:0/0:0);DG(18:0/0:0/TXB2);DG(TXB2/0:0/18:0);DG(i-18:0/6 keto-PGF1alpha/0:0);DG(6 keto-PGF1alpha/i-18:0/0:0);DG(i-18:0…	1.59953e+07	7.52823e+06	6.75949e+06	2.05196e+07	1.89325e+07	8.04711e+06	6.1485e+06	8.77727e+06	3.49764e+06	1.00101e+07	1.08831e+07	3.25927e+06	8.56557e+06	1.48965e+07	5.44867e+06	2.57727e+06	6.66878e+06	4.54061e+06	4.62663e+06	6.10519e+06	4.43462e+06	3.08707e+06	4.165e+06	3.51483e+06	4.06066e+06	4.09582e+06	5.05244e+06	4.63233e+06	7.38679e+06	1.02729e+07	4.50071e+06	2.2825	up	0.00035738	0.00794021	1.83507	yes
NEG	NEG_795.518_8.2018	795.518	8.2018	PG(18:1(11Z)/20:4(5Z,8Z,11Z,14Z))	80.2	C44H77O10P	Lipids and lipid-like molecules	Glycerophospholipids	HMDB0010625	NA	NA	PG(16:0/22:5(4Z,7Z,10Z,13Z,16Z));PG(16:0/22:5(7Z,10Z,13Z,16Z,19Z));PG(16:1(9Z)/22:4(7Z,10Z,13Z,16Z));PG(18:1(11Z)/20:4(5Z,8Z,11Z,14Z));PG(18:1(9Z)/20:4(5Z,8Z,11Z,14Z));PG(18:2(9Z,12Z)/20:3(5Z,8Z,11Z));PG(18:2(9Z,12Z)/20:3(8Z,11Z,14Z));PG(20:3(5Z,8Z,11Z)/18:2(9Z,12Z));PG(20:3(8Z,11Z,14Z)/18:2(9Z,12Z));PG(20:4(5Z,8Z,11Z,14Z)/18:1(11Z));PG(20:4(5Z,8Z,11Z,14Z)/18:1(9Z));PG(22:5(7Z,10Z,13Z,16Z,19Z)/16…	2.13599e+06	2.22304e+06	4.35357e+06	5.70118e+06	1.33011e+07	1.65541e+06	1.1783e+06	2.17305e+06	761633	2.14523e+06	3.70599e+06	757012	770772	1.97761e+06	2.68635e+06	1.14336e+06	1.12671e+06	700294	701539	830452	866061	155562	2.38057e+06	411927	335397	239636	1.08041e+06	152298	1.98751e+06	3.05999e+06	915041	3.3441	up	0.00108414	0.0168402	2.2202	yes
NEG	NEG_509.288_6.5747	509.288	6.5747	PG(18:1/0:0)	81.11	C24H46O9P1	Lipids and lipid-like molecules	Glycerophospholipids	NA	NA	NA	LysoPG(18:1(9Z)/0:0);Desmethyl rizatriptan;1-(11Z-eicosenoyl)-glycero-3-phosphate;Pristimerin;Celastrol	1.01031e+07	4.64628e+06	3.66866e+06	9.45137e+06	4.65505e+06	4.96986e+06	5.72526e+06	4.77714e+06	4.72032e+06	3.95744e+06	5.14481e+06	4.82656e+06	4.16039e+06	4.33113e+06	4.19044e+06	3.73152e+06	6.25348e+06	3.87959e+06	5.62499e+06	3.84134e+06	3.42614e+06	2.95153e+06	2.66267e+06	2.99477e+06	3.47917e+06	3.27304e+06	4.53011e+06	4.36901e+06	4.65518e+06	5.36695e+06	3.94341e+06	1.361	up	0.00865561	0.0734375	1.007	yes
NEG	NEG_793.501_8.027	793.501	8.027	PG(20:4(5Z,8Z,11Z,14Z)/18:2(9Z,12Z))	74.16	C44H75O10P	Lipids and lipid-like molecules	Glycerophospholipids	HMDB0116584	NA	NA	PG(16:0/22:6(4Z,7Z,10Z,13Z,16Z,19Z));PG(16:1(9Z)/22:5(4Z,7Z,10Z,13Z,16Z));PG(16:1(9Z)/22:5(7Z,10Z,13Z,16Z,19Z));PG(18:2(9Z,12Z)/20:4(5Z,8Z,11Z,14Z));PG(18:3(6Z,9Z,12Z)/20:3(5Z,8Z,11Z));PG(18:3(6Z,9Z,12Z)/20:3(8Z,11Z,14Z));PG(18:3(9Z,12Z,15Z)/20:3(5Z,8Z,11Z));PG(18:3(9Z,12Z,15Z)/20:3(8Z,11Z,14Z));PG(18:2(9Z,12Z)/20:4(8Z,11Z,14Z,17Z));PG(20:4(5Z,8Z,11Z,14Z)/18:2(9Z,12Z));PG(20:4(8Z,11Z,14Z,17Z)/18:…	1.5366e+06	627239	1.90773e+06	4.92443e+06	4.31552e+06	1.03938e+06	404976	1.94897e+06	2.44403e+06	1.52757e+06	1.62526e+06	917881	1.87403e+06	993967	721257	904416	1.90679e+06	856932	244239	392169	1.70413e+06	356902	630960	319995	1.46393e+06	438625	86825.3	254615	1.29891e+06	1.8634e+06	734413	2.5373	up	0.00168614	0.0228259	2.03261	yes
NEG	NEG_805.487_7.8666	805.487	7.8666	PI 32:2	75.27	C41H75O13P	Lipids and lipid-like molecules	Glycerophospholipids	HMDB0009802	C00626	NA	PI(16:0/16:2(9Z,12Z));PI(16:1(9Z)/16:1(9Z));PI(16:2(9Z,12Z)/16:0);PG(a-15:0/PGF2alpha);PG(PGF2alpha/a-15:0);PG(a-15:0/PGE1);PG(PGE1/a-15:0);PG(a-15:0/PGD1);PG(PGD1/a-15:0);PG(a-17:0/5-iso PGF2VI);PG(5-iso PGF2VI/a-17:0);PG(i-15:0/PGF2alpha);PG(PGF2alpha/i-15:0);PG(i-15:0/PGE1);PG(PGE1/i-15:0);PG(i-15:0/PGD1);PG(PGD1/i-15:0);PG(i-17:0/5-iso PGF2VI);PG(5-iso PGF2VI/i-17:0);PG(16:0/20:4(5Z,8Z,11Z,14…	4.13287e+06	480378	149074	687125	1.65127e+06	705928	283831	309969	555279	894187	70179.2	532128	659070	3.83014e+06	147547	118390	489775	61722.4	168498	372111	307880	176866	493525	82593.9	538931	370377	254889	969898	696230	1.06724e+06	325214	3.2817	up	0.0217187	0.139476	1.67625	yes
NEG	NEG_833.516_8.0304	833.516	8.0304	PI 34:2	71.46	C43H79O13P	Lipids and lipid-like molecules	Glycerophospholipids	HMDB0009846	NA	NA	PI(16:0/18:2(9Z,12Z));PI(16:1(9Z)/18:1(11Z));PI(16:1(9Z)/18:1(9Z));PI(16:2(9Z,12Z)/18:0);PI(18:0/16:2(9Z,12Z));PG(a-17:0/PGF2alpha);PG(PGF2alpha/a-17:0);PG(a-17:0/PGE1);PG(PGE1/a-17:0);PG(a-17:0/PGD1);PG(PGD1/a-17:0);PG(i-17:0/PGF2alpha);PG(PGF2alpha/i-17:0);PG(i-17:0/PGE1);PG(PGE1/i-17:0);PG(i-17:0/PGD1);PG(PGD1/i-17:0);PG(i-19:0/5-iso PGF2VI);PG(5-iso PGF2VI/i-19:0);PG(16:0/22:4(7Z,10Z,13Z,16Z)…	4.14279e+08	1.25916e+08	1.55609e+08	2.98818e+08	3.56938e+08	3.38796e+08	1.6553e+08	1.95089e+08	1.98752e+08	3.25129e+08	2.66727e+08	1.24827e+08	2.97023e+08	4.3322e+08	1.4408e+08	7.07359e+07	1.93825e+08	1.42291e+08	1.80547e+08	1.88427e+08	1.8777e+08	1.41181e+08	1.98339e+08	1.34885e+08	2.7306e+08	1.69006e+08	2.12428e+08	3.30757e+08	2.23714e+08	2.64047e+08	1.83381e+08	1.4399	up	0.0307979	0.175131	1.0186	yes
NEG	NEG_891.586_8.4466	891.586	8.4466	PI 38:1	80.83	C47H89O13P	Lipids and lipid-like molecules	Glycerophospholipids	NA	NA	NA	PA(a-25:0/20:3(8Z,11Z,14Z)-2OH(5,6));PA(20:3(8Z,11Z,14Z)-2OH(5,6)/a-25:0)	299711	370169	146136	1.52392e+06	1.26924e+06	692543	216706	79160.8	1.09945e+06	130947	392812	37089.7	415678	374307	14062.2	81026.9	34965.3	386766	52225.5	189882	287048	73704	163503	13798.6	132842	680090	554168	334633	358807	503419	214194	2.3503	up	0.034591	0.187539	1.69197	yes
NEG	NEG_857.518_8.0015	857.518	8.0015	PI(16:0/20:4(5Z,8Z,11Z,14Z))	86.49	C45H79O13P	Lipids and lipid-like molecules	Glycerophospholipids	HMDB0009789	NA	NA	PI(16:0/20:4(8Z,11Z,14Z,17Z));Phosphatidylinositol(36:4);PG(i-19:0/20:5(7Z,9Z,11E,13E,17Z)-3OH(5,6,15));PG(20:5(7Z,9Z,11E,13E,17Z)-3OH(5,6,15)/i-19:0);PE(P-16:0/LTE4);PE(LTE4/P-16:0);PG(18:0/22:6(4Z,7Z,10Z,13Z,16Z,19Z));PG(18:1(11Z)/22:5(4Z,7Z,10Z,13Z,16Z));PG(18:1(11Z)/22:5(7Z,10Z,13Z,16Z,19Z));PG(18:1(9Z)/22:5(4Z,7Z,10Z,13Z,16Z));PG(18:1(9Z)/22:5(7Z,10Z,13Z,16Z,19Z));PG(18:2(9Z,12Z)/22:4(7Z,10Z…	4.93675e+08	1.3422e+08	1.71717e+08	3.11122e+08	3.28513e+08	3.35479e+08	1.88266e+08	1.81456e+08	1.95891e+08	3.30914e+08	2.01238e+08	1.33423e+08	2.41758e+08	5.18933e+08	1.48002e+08	8.28086e+07	1.65017e+08	1.80207e+08	1.70357e+08	2.56006e+08	1.71414e+08	1.61514e+08	1.65882e+08	1.14328e+08	2.8523e+08	1.34278e+08	1.71724e+08	3.09738e+08	2.24397e+08	2.69043e+08	1.7975e+08	1.4968	up	0.0210735	0.137173	1.10797	yes
NEG	NEG_835.524_8.0214	835.524	8.0214	PI(18:1(11Z)/16:0)	87.36	C43H81O13P	Lipids and lipid-like molecules	Glycerophospholipids	HMDB0009822	C00626	NA	Roxithromycin;PG(18:0/20:3(5Z,8Z,11Z));PG(18:0/20:3(8Z,11Z,14Z));PG(20:1(11Z)/18:2(9Z,12Z));PA(21:0/20:3(8Z,11Z,14Z)-2OH(5,6));PA(20:3(8Z,11Z,14Z)-2OH(5,6)/21:0);PA(a-21:0/20:3(8Z,11Z,14Z)-2OH(5,6));PA(20:3(8Z,11Z,14Z)-2OH(5,6)/a-21:0);PA(i-21:0/20:3(8Z,11Z,14Z)-2OH(5,6));PA(20:3(8Z,11Z,14Z)-2OH(5,6)/i-21:0);Oligomycin;SM(d17:2(4E,8Z)/22:6(5Z,8E,10Z,13Z,15E,19Z)-2OH(7S, 17S));SM(d17:2(4E,8Z)/22:6…	5.74743e+07	1.74539e+07	1.95981e+07	3.14811e+07	5.47674e+07	4.95758e+07	2.11795e+07	2.22423e+07	2.4964e+07	4.30317e+07	3.73313e+07	1.54902e+07	3.88973e+07	5.4656e+07	1.77266e+07	9.88718e+06	2.24916e+07	1.67734e+07	2.14964e+07	2.10677e+07	2.44853e+07	1.70058e+07	2.26379e+07	1.60063e+07	3.83906e+07	2.35423e+07	2.75512e+07	3.74448e+07	2.87375e+07	3.48674e+07	2.26076e+07	1.5423	up	0.0174521	0.120254	1.13474	yes
POS	POS_594.375_7.3725	594.375	7.3725	POV-PC	83.97	C29H56NO9P	Lipids and lipid-like molecules	Glycerophospholipids	NA	NA	NA	Povpc;Etiopurpurin;PA(8:0/18:1(12Z)-O(9S,10R));PA(18:1(12Z)-O(9S,10R)/8:0);PA(8:0/18:1(9Z)-O(12,13));PA(18:1(9Z)-O(12,13)/8:0)	2.58717e+06	704074	1.00345e+06	952664	1.55818e+06	923073	1.149e+06	694308	856571	394945	565600	888853	796666	537512	2.05471e+06	2.13078e+06	2.00732e+06	1.83267e+06	2.36266e+06	1.89313e+06	2.4141e+06	1.73995e+06	1.57217e+06	3.57318e+06	2.45314e+06	1.09153e+06	2.07784e+06	1.53205e+06	1.5124e+06	972290	2.05252e+06	0.4737	down	1.09071e-05	0.000617951	2.09843	yes
NEG	NEG_810.527_9.7034	810.527	9.7034	PS(18:0/20:4(8Z,11Z,14Z,17Z))	77.17	C44H78NO10P	Lipids and lipid-like molecules	Glycerophospholipids	HMDB0010165	C02737	map00260(Glycine, serine and threonine metabolism);map00564(Glycerophospholipid metabolism);map01100(Metabolic pathways);map01110(Biosynthesis of secondary metabolites);map04148(Efferocytosis);map05140(Leishmaniasis);map05146(Amoebiasis);map05322(Systemic lupus erythematosus)	PS(18:0/20:4(8Z,11Z,14Z,17Z));PS(18:0/20:4(5Z,8Z,11Z,14Z));PS(18:1(9Z)/20:3(8Z,11Z,14Z));PS(20:3(8Z,11Z,14Z)/18:1(9Z));PS(20:4(5Z,8Z,11Z,14Z)/18:0);PS(16:0/22:4(7Z,10Z,13Z,16Z));PS(18:1(11Z)/20:3(5Z,8Z,11Z));PS(18:1(11Z)/20:3(8Z,11Z,14Z));PS(18:1(9Z)/20:3(5Z,8Z,11Z));PS(18:2(9Z,12Z)/20:2(11Z,14Z));PS(18:3(6Z,9Z,12Z)/20:1(11Z));PS(18:3(9Z,12Z,15Z)/20:1(11Z));PS(18:4(6Z,9Z,12Z,15Z)/20:0);PS(20:0/18…	1.05878e+06	764620	803991	779891	810031	1.29956e+06	972079	417849	260975	549172	882873	589206	514932	707488	602518	929380	682978	697686	251799	724044	320139	578178	178779	227993	132234	300627	167095	175425	585011	743674	426348	1.7443	up	0.00355233	0.0389527	1.60868	yes
NEG	NEG_522.283_6.3318	522.283	6.3318	PS(18:1(9Z)/0:0)	88.77	C24H46NO9P	Lipids and lipid-like molecules	Glycerophospholipids	NA	NA	NA	1-Oleoylglycerophosphoserine;LysoPS(18:1(9Z)/0:0);LysoPE(0:0/18:2(9Z,12Z));LysoPE(18:2(9Z,12Z)/0:0);VAPIPROST;Bucromarone	129286	282110	289855	508676	101413	116707	257822	237450	228371	206101	146138	195529	150112	159386	152491	190772	214240	150499	122128	127162	128179	113340	163227	93450.6	132247	178105	88652.8	176907	180013	214925	145100	1.4812	up	0.0218485	0.139696	1.03532	yes
NEG	NEG_834.52_8.0306	834.52	8.0306	PS(20:3(8Z,11Z,14Z)/20:3(5Z,8Z,11Z))	70.4	C46H78NO10P	Lipids and lipid-like molecules	Glycerophospholipids	HMDB0112628	NA	NA	PS(16:0/PGF1alpha);PS(PGF1alpha/16:0);PE(16:0/PGF2alpha);PE(PGF2alpha/16:0);PE(16:0/PGE1);PE(PGE1/16:0);PE(16:0/PGD1);PE(PGD1/16:0);PE(16:1(9Z)/PGF1alpha);PE(PGF1alpha/16:1(9Z));PE(18:0/5-iso PGF2VI);PE(5-iso PGF2VI/18:0);PE(P-16:0/6 keto-PGF1alpha);PE(6 keto-PGF1alpha/P-16:0);PE(P-16:0/TXB2);PE(TXB2/P-16:0);PC(15:0/5-iso PGF2VI);PC(5-iso PGF2VI/15:0);PE(15:0/PGF2alpha);PE(PGF2alpha/15:0);PE(15:0…	1.91681e+08	5.79824e+07	7.04293e+07	1.29986e+08	1.77634e+08	1.67015e+08	7.63979e+07	7.9942e+07	8.22138e+07	1.46961e+08	1.22524e+08	6.16912e+07	1.34083e+08	2.09611e+08	6.30284e+07	3.39244e+07	7.54037e+07	6.20112e+07	7.86405e+07	8.02848e+07	8.24747e+07	6.21214e+07	9.16496e+07	5.76653e+07	1.13313e+08	7.65199e+07	9.269e+07	1.34325e+08	1.00436e+08	1.22011e+08	7.88609e+07	1.5472	up	0.012927	0.0979371	1.16066	yes
NEG	NEG_179.056_0.7502	179.056	0.7502	PSICOSE	71.94	C6H12O6	Organic oxygen compounds	Organooxygen compounds	NA	NA	NA	D-Glucose;D-Galactose;D-Mannose;myo-Inositol;3-Deoxyarabinohexonic acid;D-Fructose;Allose;L-Sorbose;Paraxanthine;Theophylline;Theobromine;alpha-D-Glucose;D-Tagatose;beta-D-Galactose;scyllo-Inositol;L-Gulose;Dihydroxyacetone (dimer);L-Galactose;Levoinositol;muco-Inositol;Glycoprotein-phospho-D-mannose;epi-Inositol;neo-Inositol;D-chiro-Inositol;cis-Inositol;allo-Inositol;(2R,3R,4R,5R)-2,3,4,5,6-Pen…	1.33913e+08	1.19796e+08	1.11883e+08	1.1374e+08	1.17074e+08	1.12629e+08	1.41054e+08	1.15524e+08	1.04927e+08	1.26986e+08	1.22191e+08	1.08374e+08	1.1035e+08	1.12778e+08	8.92217e+07	8.45636e+07	7.55826e+07	9.83311e+07	8.80296e+07	8.51958e+07	9.43656e+07	9.52548e+07	8.77222e+07	1.06333e+08	8.82674e+07	7.81572e+07	9.37461e+07	9.20523e+07	1.03859e+08	1.17944e+08	8.97731e+07	1.3138	up	6.52797e-09	1.77894e-06	1.29438	yes
POS	POS_300.289_8.0686	300.289	8.0686	Palmitoylethanolamide	71.31	C18H37NO2	Organic acids and derivatives	Carboximidic acids and derivatives	HMDB0002100	C16512	map04080(Neuroactive ligand-receptor interaction)	3-Dehydrosphinganine;Palmitoylethanolamide;L-Threo-Sphingosine C-18;Palmitoylethanolamine;Oleic acid;Elaidic acid;Petroselinic acid;Vaccenic acid;(Z)-13-Octadecenoic acid;Ethyl 9-hexadecenoate;7Z-octadecenoic acid;Octadec-9-enoic Acid;cis-Vaccenic acid;11-Aoctadecenoic acid;Octadecenoic acid;Octadec-5-enoic acid;7-Octadecenoic acid;trans-10-Octadecenoic acid;6-Octadecenoic acid;cis-12-Octadecenoi…	1.19934e+06	408434	512623	590166	1.01024e+06	830436	394984	608630	1.07338e+06	349886	446980	957255	662926	716568	1.04538e+06	1.18359e+06	1.10425e+06	1.1547e+06	770458	923202	937270	1.04084e+06	1.05853e+06	950915	1.13591e+06	880673	949128	968969	852345	697275	1.00742e+06	0.6921	down	0.00141249	0.0203937	1.37157	yes
NEG	NEG_441.237_6.2094	441.237	6.2094	Pectachol	74.46	C26H34O6	Phenylpropanoids and polyketides	Coumarins and derivatives	HMDB0039064	NA	NA	7-Ketodeoxycholic acid;3,7-Dihydroxy-12-oxocholanoic acid;Annocherin A;(6b,7b,13R)-6,7-Diacetoxy-8,14-labdadiene-13-ol;Alfaprostolum;Neurogard;9-(Methylaminomethyl)anthracene;4-Benzofuranacetamide, N-methyl-N-(7-(1-pyrrolidinyl)-1-oxaspiro(4.5)dec-8-yl)-	954088	641742	854990	637524	885479	683764	778527	818105	891924	398524	557126	671898	699384	682594	1.19092e+06	1.24733e+06	1.27512e+06	925940	1.25937e+06	1.29934e+06	991282	1.57168e+06	1.10834e+06	1.07947e+06	1.06347e+06	1.09272e+06	1.40439e+06	1.36016e+06	965185	725405	1.20497e+06	0.602	down	3.03995e-07	3.89113e-05	1.74882	yes
NEG	NEG_159.102_4.0524	159.102	4.0524	Peroxyoctanoic acid	70.83	C8H16O3	Organic acids and derivatives	Carboxylic acids and derivatives	HMDB0032827	NA	NA	7-Hydroxyoctanoic acid;Hydroxyoctanoic acid;3-Hydroxyoctanoic acid;(R)-2-Hydroxycaprylic acid;(R)-3-Hydroxyoctanoic acid;5-Hydroxyvalproic acid;3-Hydroxyvalproic acid;4-Hydroxyvalproic acid;Ethyl (&#177;)-3-hydroxyhexanoate;(+/-)-Ethyl 2-hydroxy-3-methylvalerate;Peroxyoctanoic acid;Isoamyl lactate;Ethyl 2-hydroxy-4-methylpentanoate;8-Hydroxyoctanoate;(7R)-7-hydroxyoctanoic Acid;2-Ethyl-6-hydroxyh…	277811	241451	334885	270858	214693	400771	357710	369844	391841	277929	261277	421385	175110	1.15403e+06	563537	476573	423813	313992	456242	513419	409356	398158	352104	565039	462639	384054	524938	624064	414911	367828	461995	0.7962	down	0.0219551	0.140243	1.00738	yes
NEG	NEG_282.252_9.7024	282.252	9.7024	Petroselinic acid	72.32	C18H34O2	Lipids and lipid-like molecules	Fatty Acyls	HMDB0002080	C08363	NA	NA	5.41166e+07	2.49587e+07	5.80114e+07	3.29797e+07	3.8572e+07	1.81061e+08	2.89796e+07	4.53152e+07	5.93736e+07	3.07588e+07	2.00023e+07	1.74363e+08	1.44663e+07	1.57197e+07	7.54373e+07	4.84158e+07	1.10838e+08	1.25753e+08	1.2727e+07	1.14131e+08	7.12231e+07	6.01579e+07	6.48011e+07	2.02894e+08	1.06179e+08	1.01937e+08	1.6678e+08	4.19489e+07	7.43537e+07	5.56199e+07	9.30875e+07	0.5975	down	0.0258907	0.155321	1.46493	yes
POS	POS_137.045_2.9393	137.045	2.9393	Phenyl vinyl sulfide	79.27	C8H8S	Organosulfur compounds	Thioethers	HMDB0031825	NA	NA	Hypoxanthine;Erythronic acid;Threonic acid;Allopurinol;1-Pentanesulfenothioic acid;Ethyl propyl disulfide;Ethyl isopropyl disulfide;2-Hydroxypurine;2,3,4-Trihydroxybutanoic acid;9H-Purine-9-ol	79574.1	101653	166711	70778.3	241076	108156	121425	219542	205819	213510	73727.7	186278	91492.8	209124	35260.8	46934.2	65478	82929.1	111658	57254.4	146533	156241	33987.5	81217.6	55160.1	73308.4	26092.9	46040.3	110963	149205	72721.1	2.0517	up	0.000405327	0.00867453	1.88991	yes
NEG	NEG_163.04_3.4619	163.04	3.4619	Phenylpyruvic acid	71.92	C9H8O3	Benzenoids	Benzene and substituted derivatives	HMDB0000205	C00166	map00360(Phenylalanine metabolism);map00400(Phenylalanine, tyrosine and tryptophan biosynthesis);map00470(D-Amino acid metabolism);map00960(Tropane, piperidine and pyridine alkaloid biosynthesis);map01060(Biosynthesis of plant secondary metabolites);map01100(Metabolic pathways);map01110(Biosynthesis of secondary metabolites);map01210(2-Oxocarboxylic acid metabolism);map01230(Biosynthesis of amino…	Phenylpyruvic acid;m-Coumaric acid;2-Hydroxycinnamic acid;Enol-phenylpyruvate;Methyl Phenylglyoxalate;METHYL 4-FORMYLBENZOATE;2,4,6-Octatriyn-1-ol;Benzofuran;3,5,7-Octatriyn-1-ol;xi-2,3-Octadiene-5,7-diyn-1-ol	160662	70650.5	192191	138772	80652.4	77423.1	158162	181241	45128.7	148597	184678	15549.5	361711	125630	35339.7	63876.1	23103.9	39555.2	85169	12748.8	91687.5	23797	100984	41002.9	33421.7	41738.5	35803.7	33851.1	92968.8	138646	47291.4	2.9317	up	0.00062505	0.0115085	2.08187	yes
NEG	NEG_579.389_6.1236	579.389	6.1236	Phoenicoxanthin	72.07	C40H52O3	Lipids and lipid-like molecules	Prenol lipids	METPA1673	C15967	map00906(Carotenoid biosynthesis);map01110(Biosynthesis of secondary metabolites)	beta-Doradecin;Phoenicoxanthin;Papilioerythrinone;DG(10:0/PGE2/0:0);DG(PGE2/10:0/0:0);DG(10:0/0:0/PGE2);DG(PGE2/0:0/10:0);DG(10:0/PGD2/0:0);DG(PGD2/10:0/0:0);DG(10:0/0:0/PGD2);DG(PGD2/0:0/10:0);DG(10:0/20:4(7E,9E,11Z,13E)-3OH(5S,6R,15S)/0:0);DG(20:4(7E,9E,11Z,13E)-3OH(5S,6R,15S)/10:0/0:0);DG(10:0/0:0/20:4(7E,9E,11Z,13E)-3OH(5S,6R,15S));DG(20:4(7E,9E,11Z,13E)-3OH(5S,6R,15S)/0:0/10:0);Verapamil met…	68719.3	440486	41575.4	147073	66638.6	105023	144312	188688	167306	135232	210018	55423.1	52000.3	32786.7	695996	66876	1.59399e+06	844246	908143	159803	270782	278755	143118	242040	618985	347247	135427	82292.7	294392	132520	456264	0.2904	down	0.00259546	0.031183	2.04207	yes
NEG	NEG_818.589_7.0683	818.589	7.0683	Phosphatidylcholine 16:0-18:1	70.99	C42H82NO8P	Lipids and lipid-like molecules	Glycerophospholipids	NA	NA	NA	PS(18:0/20:0);PS(14:0/24:0);PS(16:0/22:0);PS(20:0/18:0);PS(22:0/16:0);PS(24:0/14:0);PC(18:0/18:1(12Z)-2OH(9,10));PC(18:1(12Z)-2OH(9,10)/18:0);PE(22:1(13Z)/P-18:1(11Z));PE(22:1(13Z)/P-18:1(9Z));PE(22:2(13Z,16Z)/P-18:0);PE(P-18:0/22:2(13Z,16Z));PE(P-18:1(11Z)/22:1(13Z));PE(P-18:1(9Z)/22:1(13Z));PC(15:0/20:1(11Z));PC(20:1(11Z)/15:0);PE(14:0/24:1(15Z));PE(14:1(9Z)/24:0);PE(16:0/22:1(13Z));PE(16:1(9Z)…	2.37795e+07	4.38056e+07	9.09259e+07	3.71229e+07	3.19363e+07	4.73206e+07	1.49395e+08	1.06405e+08	4.63148e+07	4.64204e+07	7.45225e+07	1.07271e+08	6.44455e+07	1.12725e+08	1.1816e+08	1.06093e+08	5.01815e+07	1.28618e+08	9.04e+07	1.01143e+08	7.04968e+07	1.30793e+08	1.12372e+08	1.09849e+08	1.58698e+08	8.59857e+07	1.13954e+08	1.42493e+08	8.93438e+07	7.01707e+07	1.08517e+08	0.6466	down	0.00436793	0.044935	1.41418	yes
NEG	NEG_478.284_6.6638	478.284	6.6638	Phosphatidylethanolamine lyso 18:1	84.79	C23H46NO7P	Lipids and lipid-like molecules	Glycerophospholipids	NA	NA	NA	N-Arachidonoyl Glutamic acid;N-Arachidonoyl Aspartic acid	1.08299e+07	4.90511e+06	4.50512e+06	1.22786e+07	2.10253e+06	4.17931e+06	4.41948e+06	8.75535e+06	3.42517e+06	5.36283e+06	6.49061e+06	3.49378e+06	4.32401e+06	6.7356e+06	3.20408e+06	2.16017e+06	4.71516e+06	2.63327e+06	2.81359e+06	2.41483e+06	2.26805e+06	1.1661e+06	2.82751e+06	1.90995e+06	2.05456e+06	2.24405e+06	2.41726e+06	3.80989e+06	4.23021e+06	5.84338e+06	2.61703e+06	2.2328	up	7.21565e-05	0.00246927	1.90214	yes
NEG	NEG_502.284_6.6727	502.284	6.6727	Phosphatidylethanolamine lyso 20:3	89.76	C25H46NO7P	Lipids and lipid-like molecules	Glycerophospholipids	NA	NA	NA	Tiropramide;Oxethazaine;N-Docosahexaenoyl Glutamic acid;N-Docosahexaenoyl Aspartic acid	3.93596e+06	4.80727e+06	3.22301e+06	4.99915e+06	4.27279e+06	4.59853e+06	4.54247e+06	3.7728e+06	3.37118e+06	3.46124e+06	4.13656e+06	4.08844e+06	3.6408e+06	3.94514e+06	3.60168e+06	2.48484e+06	3.16688e+06	2.97844e+06	2.57032e+06	3.8421e+06	2.6286e+06	1.91212e+06	2.32956e+06	2.22594e+06	2.55029e+06	2.02939e+06	2.74959e+06	3.44578e+06	3.40396e+06	4.05681e+06	2.75111e+06	1.4746	up	4.70462e-06	0.000338529	1.48466	yes
NEG	NEG_498.263_6.347	498.263	6.347	Phosphatidylethanolamine lyso 20:5	70.05	C25H42NO7P	Lipids and lipid-like molecules	Glycerophospholipids	NA	NA	NA	LysoPE(0:0/20:5(5Z,8Z,11Z,14Z,17Z));LysoPE(20:5(5Z,8Z,11Z,14Z,17Z)/0:0);Osimertinib;Peregrine	1.58295e+07	2.22619e+06	2.09433e+06	7.82074e+06	2.15463e+06	1.98104e+06	2.68777e+06	6.20677e+06	1.0666e+06	1.66788e+06	1.54778e+06	8.37795e+06	1.92378e+06	5.43214e+06	1.53519e+06	2.47376e+06	1.01754e+06	1.54932e+06	1.65389e+06	3.10016e+06	1.72568e+06	1.41513e+06	2.13761e+06	1.71363e+06	1.308e+06	2.2692e+06	1.42603e+06	2.17868e+06	3.09003e+06	4.35836e+06	1.8217e+06	2.3925	up	0.0182168	0.124232	1.37781	yes
NEG	NEG_295.264_9.5797	295.264	9.5797	Phytomonic Acid	78.47	C19H36O2	Lipids and lipid-like molecules	Fatty Acyls	NA	NA	NA	10Z-Nonadecenoic acid;4,6-Nonadecanedione;Methyl cis-9-octadecenoate;Methyl octadec-11-enoate;Nonadecenoic acid;9,12-Octadecadiene, (E,E)-	1.07566e+07	5.1829e+06	1.88185e+07	9.27825e+06	1.21099e+07	3.84549e+07	7.34526e+06	1.86845e+07	3.27775e+07	7.55444e+06	7.55138e+06	6.17203e+07	4.28911e+06	5.07552e+06	5.33119e+07	4.09633e+07	3.66012e+07	3.0133e+07	4.26024e+07	2.61898e+07	2.55821e+07	2.49989e+07	3.15182e+07	4.83047e+07	5.21073e+07	3.60293e+07	8.22942e+07	2.67768e+07	2.84647e+07	1.71142e+07	3.98152e+07	0.4298	down	0.000175647	0.00482105	2.3901	yes
NEG	NEG_337.158_4.2924	337.158	4.2924	Pinolidoxin	74.21	C18H26O6	Organoheterocyclic compounds	Oxocins	NA	NA	NA	2'-Oxoquinidinone;3'-Carbamoyl-[1,1'-biphenyl]-3-yl cyclohexylcarbamate;Picrinine;2-Hydroxyestradiol-3-methyl ether;2-Methoxyestradiol;19-Hydroxyandrost-4-ene-3,17-dione;19-Oxotestosterone;7a-Hydroxyandrost-4-ene-3,17-dione;11b-Hydroxyandrost-4-ene-3,17-dione;16a-Hydroxyandrost-4-ene-3,17-dione;4-Methoxy-17beta-estradiol;(2Z,8S,9Z)-2,9-Heptadecadiene-8-hydroxy-4,6-diyne-1-yl acetate;[8]-Dehydrosh…	15724.2	22687	11597.4	30583.3	12072.5	42047.7	35270.4	329756	7444.56	64735.1	26291.6	21087.3	39146.7	4939.42	49444.5	96317	53136.3	309826	255953	12201.6	32898	30453.4	162062	176483	214051	58379.2	39247.7	88892.4	80097.4	47384.5	112810	0.42	down	0.00527475	0.0517065	2.04689	yes
POS	POS_286.143_6.2077	286.143	6.2077	Piperine	75.04	C17H19NO3	Alkaloids and derivatives	NA	HMDB0029377	C03882	map00960(Tropane, piperidine and pyridine alkaloid biosynthesis);map01064(Biosynthesis of alkaloids derived from ornithine, lysine and nicotinic acid)	Morphine;Hydromorphone;Piperine;Erysopine;Secodemethylclausenamide;(-)-Morphine;Norcodeine;norhydrocodone;Acetamide, N-hydroxy-N-(1-(4-(phenylmethoxy)phenyl)ethyl)-;cis-3,4',5-Trimethoxy-3'-aminostilbene;Galanthaminone;N-Norcodeine;5-(1,3-Benzodioxol-5-yl)-1-piperidin-1-ylpenta-2,4-dien-1-one;Coclaurine;N-(Heptan-4-yl)benzo[d][1,3]dioxole-5-carboxamide;Eugenyl benzoate;Cimetidine sulfoxide;Hydrox…	314287	330525	17427.9	2.22985e+07	7.01785e+06	4.16985e+06	60719.2	1.45934e+06	4.93754e+06	6.20193e+06	1.37227e+07	5.04212e+07	999483	4.92679e+06	3.86698e+06	2.56114e+07	2.36312e+07	1.47294e+07	1.99429e+07	6.91064e+06	5.95626e+06	1.74819e+07	1.63527e+07	2.58716e+06	7.43898e+06	1.11685e+07	7.1137e+06	1.74226e+06	1.00504e+07	8.34844e+06	1.17524e+07	0.7104	down	0.0305227	0.174087	2.13287	yes
NEG	NEG_495.296_4.8294	495.296	4.8294	Pregnanediol 3-O-glucuronide	70.74	C27H44O8	Lipids and lipid-like molecules	Steroids and steroid derivatives	NA	NA	NA	3-alpha,20-alpha-Dihydroxy-5-beta-pregnane 3-glucuronide;(3b,16b,20R)-Pregn-5-ene-3,16,20-triol 3-glucoside;20,26-Dihydroxyecdysone;Polypodine B;Pindolol;Bunitrolol;Sodium stearoyl 2-lactylate;Pangamic acid;simvastatin hydroxy acid;DG(2:0/20:3(5Z,8Z,11Z)-O(14R,15S)/0:0);DG(20:3(5Z,8Z,11Z)-O(14R,15S)/2:0/0:0);DG(2:0/0:0/20:3(5Z,8Z,11Z)-O(14R,15S));DG(20:3(5Z,8Z,11Z)-O(14R,15S)/0:0/2:0);DG(2:0/20:3…	232209	421194	4.65084e+06	325818	819803	2.42736e+06	409382	525608	571937	4.26085e+06	491345	374949	445704	38495.5	667489	228612	878335	587520	7.63165e+06	739207	7.40589e+06	1.175e+06	6.77138e+06	1.73438e+06	934151	864884	6.61636e+06	1.27119e+06	1.91077e+06	1.14253e+06	2.679e+06	0.4265	down	0.0407679	0.205414	1.65407	yes
POS	POS_616.251_5.1433	616.251	5.1433	Pro Gln Gln Asp Glu	84.09	C24H37N7O12	NA	NA	NA	NA	NA	NA	591499	2.87717e+06	2.88602e+06	2.49017e+06	1.70853e+06	2.36586e+06	1.14473e+06	1.45112e+06	1.8088e+06	1.02763e+06	788740	2.75346e+06	1.75174e+06	1.45203e+06	3.38024e+06	1.92198e+06	4.90929e+06	2.60129e+06	4.58188e+06	1.1282e+06	1.90231e+06	899023	1.48902e+06	3.80878e+06	2.21029e+06	2.46637e+06	9.68832e+06	2.66883e+06	2.45548e+06	1.79268e+06	3.11827e+06	0.5749	down	0.0372167	0.194057	1.24641	yes
POS	POS_353.192_4.5443	353.192	4.5443	Progesterone	97	C21H30O2	Lipids and lipid-like molecules	Steroids and steroid derivatives	HMDB0001830	C00410	map00140(Steroid hormone biosynthesis);map01100(Metabolic pathways);map04080(Neuroactive ligand-receptor interaction);map04114(Oocyte meiosis);map04913(Ovarian steroidogenesis);map04914(Progesterone-mediated oocyte maturation);map04917(Prolactin signaling pathway);map04925(Aldosterone synthesis and secretion);map04927(Cortisol synthesis and secretion);map04934(Cushing syndrome);map05200(Pathways …	Canavanine;Nor-NOHA;(R)-3-((2-(2-(4-Methylpiperidin-1-yl)ethyl)pyrrolidin-1-yl)sulfonyl)phenol;Almokalant;AB-Pinaca;N6-Cyclopentyladenosine;Acarviosin;Hippuryl-L-arginine;Riboprine;N-6-Isopent-2-enyl-adenosine	764793	761837	666605	902539	562843	536240	782660	1.50056e+06	1.8148e+06	1.18501e+06	1.39524e+06	810963	1.10795e+06	1.31079e+06	412735	517153	403613	675313	430576	872653	364316	1.52262e+06	362825	483527	604913	719098	791905	600706	816600	1.00735e+06	625854	1.6096	up	0.0024305	0.0296354	1.38183	yes
POS	POS_543.313_4.8933	543.313	4.8933	Puberanidine	73.61	C30H42N2O7	Lipids and lipid-like molecules	Prenol lipids	NA	NA	NA	PL;Protobassic acid;Tomentosic acid;Theasapogenol E;(1beta,2alpha,3alpha)-1,2,3,24-Tetrahydroxy-12-oleanen-28-oic acid;Myrianthic acid;Cyclopassifloic acid D;6beta-Hydroxyasiatic acid;Isothankunic acid;(3beta,19alpha)-3,19,23,24-Tetrahydroxy-12-oleanen-28-oic acid;(1S,2R,4As,6aS,6bR,8R,9R,10R,11R,12aR,12bR,14bS)-8,10,11-trihydroxy-9-(hydroxymethyl)-1,2,6a,6b,9,12a-hexamethyl-1,2,3,4,4a,5,6,6a,6b,…	33686.7	138405	10215.3	74362.1	10661.5	54192.6	106551	114231	95464.3	43442.5	56908.5	88831.5	16169.7	16306.6	63629.8	215161	254500	107028	407024	35275.3	295194	82019.7	82626	26532.3	63051.6	157299	107055	65944.2	100777	61387.7	140167	0.438	down	0.0143044	0.104972	1.67711	yes
NEG	NEG_277.217_8.0172	277.217	8.0172	Punicic acid	93.38	C18H30O2	Lipids and lipid-like molecules	Fatty Acyls	HMDB0030963	C08364	NA	alpha-Linolenic acid;Calendic acid;Punicic acid;Linolenelaidic acid;Octadeca-8,10,12-trienoic acid;Octadeca-6,9,12-trienoic acid;alpha-Eleostearic acid;Octadec-11-en-9-ynoic acid;Octadecatrienoic acid;Pinolenic acid;Sodium palmitate;Jacaric acid;Na,Na-Dimethylhistamine;6-Phenylundecane;Gonane;Aplotaxene;(Z,Z,Z)-1,8,11,14-Heptadecatetraene;(3E,7E)-4,8,12-Trimethyl-1,3,7,11-tridecatetraene;1,2-Dime…	8.03765e+08	3.07689e+08	5.91231e+08	6.66834e+08	3.4704e+08	1.30799e+09	3.27534e+08	8.97561e+08	8.69685e+08	4.20429e+08	3.18228e+08	1.45045e+09	1.44402e+08	1.11312e+08	1.85574e+09	9.74286e+08	1.12662e+09	8.67508e+08	1.0167e+09	9.78084e+08	6.31174e+08	6.54447e+08	1.36885e+09	1.96981e+09	1.26075e+09	1.27866e+09	3.06058e+09	5.72013e+08	9.34978e+08	6.11725e+08	1.25823e+09	0.4862	down	0.00176899	0.0235947	1.93569	yes
POS	POS_180.066_3.2094	180.066	3.2094	S-PROPYL THIOBENZOATE	71.57	C10H12OS	Benzenoids	Benzene and substituted derivatives	NA	NA	NA	Hippuric acid;3-Succinoylpyridine;Methyl n-formylanthranilate;1-(4-Methoxyphenyl)-2-nitroethylene;2-Propenamide, 3-(3,4-dihydroxyphenyl)-;4-Acetamidobenzoic acid;Adrenolutin;Erbstatin;N-Acetyl-2-hydroxybenzamide;1-Methyl-1H-indole-3,5,6-triol;3 Hydroxycoumarin;Umbelliferone	1.78985e+06	1.57318e+06	554258	589172	589794	649517	363867	1.05858e+06	380112	2.53722e+06	1.03066e+06	1.29784e+06	370025	395228	1.12385e+06	8.58664e+06	442417	663994	2.19639e+06	1.44579e+06	2.0551e+06	1.23736e+06	5.11633e+06	3.4984e+06	1.26103e+06	1.00893e+06	1.62782e+06	5.53211e+06	1.74912e+06	941379	2.55687e+06	0.3682	down	0.00530388	0.0518774	1.79856	yes
NEG	NEG_640.332_4.1488	640.332	4.1488	SHexCer 23:1;3O	75.58	C29H55NO12S	Lipids and lipid-like molecules	Sphingolipids	NA	NA	NA	NA	83263.1	75515.1	20044.4	60221.7	185650	37392	77270.8	479491	38292.4	72253.1	98257.6	36287.8	181117	38447.8	123302	132232	112466	1.02008e+06	150433	28430	615347	38986.5	737228	834620	334202	112120	265676	73798.4	216515	105965	327066	0.324	down	0.0173671	0.120125	1.73891	yes
NEG	NEG_446.291_4.6628	446.291	4.6628	SL 10:0;O/13:1	71.18	C23H45NO5S	Organic acids and derivatives	Organic sulfonic acids and derivatives	NA	NA	NA	1-(2-(1-Adamantyl)ethyl)-1-pentyl-3-(3-(4-pyridyl)propyl)urea;N-Arachidonoyl Proline;N-Eicosapentaenoyl Valine;Cetilistat;N-Palmitoyl Methionine;N-Stearoyl Cysteine	101049	220691	87171.5	158952	445347	65380.7	215431	496129	179695	50757.2	274363	57516	270214	109289	295722	116599	235369	1.57798e+06	312333	175036	1.37263e+06	92854	2.41998e+06	668529	807355	248315	415208	113248	413684	195142	632225	0.3087	down	0.0133023	0.0998763	1.74518	yes
NEG	NEG_448.307_4.7715	448.307	4.7715	SL 13:0;O/10:0	72.45	C23H47NO5S	Organic acids and derivatives	Organic sulfonic acids and derivatives	NA	NA	NA	Deoxycholic acid glycine conjugate;Chenodeoxyglycocholic acid;Chenodeoxycholylglycine;Deoxycholylglycine;Glycohyodeoxycholic acid;N-Palmitoyl phenylalanine;N-Arachidonoyl Valine;N-Arachidonoyl GABA	6.04536e+06	1.71811e+07	8.105e+06	1.81227e+07	4.46073e+06	6.7516e+06	1.46834e+06	1.25925e+06	1.31858e+07	1.24511e+06	1.15131e+06	7.13402e+06	2.23573e+07	3.81931e+06	3.66763e+06	6.44597e+06	4.71098e+06	516434	440851	197677	38302.8	2.98698e+06	71460.6	549865	126307	2.81765e+06	1.68342e+06	577984	4.89709e+06	8.02049e+06	1.77368e+06	4.522	up	0.000899314	0.0148164	2.95023	yes
NEG	NEG_759.565_7.9581	759.565	7.9581	SM 25:2;2O/9:0	85.58	C39H77N2O6P	Lipids and lipid-like molecules	Sphingolipids	NA	NA	NA	SM(d18:1/18:1(12Z)-2OH(9,10));DG(20:5(5Z,8Z,11Z,14Z,17Z)/24:1(15Z)/0:0);DG(22:0/22:6(4Z,7Z,10Z,13Z,16Z,19Z)/0:0);DG(22:1(13Z)/22:5(4Z,7Z,10Z,13Z,16Z)/0:0);DG(22:1(13Z)/22:5(7Z,10Z,13Z,16Z,19Z)/0:0);DG(22:2(13Z,16Z)/22:4(7Z,10Z,13Z,16Z)/0:0);DG(22:4(7Z,10Z,13Z,16Z)/22:2(13Z,16Z)/0:0);DG(22:5(4Z,7Z,10Z,13Z,16Z)/22:1(13Z)/0:0);DG(22:5(7Z,10Z,13Z,16Z,19Z)/22:1(13Z)/0:0);DG(22:6(4Z,7Z,10Z,13Z,16Z,19Z)…	3.72739e+07	8.6176e+07	7.8812e+07	6.91445e+07	8.77129e+07	8.41714e+07	9.02384e+07	5.59393e+07	6.09026e+07	8.36973e+07	8.16915e+07	7.89674e+07	8.69465e+07	6.64969e+07	7.04895e+07	6.514e+07	6.68988e+07	6.19996e+07	5.8786e+07	8.38489e+07	3.13125e+07	4.9412e+07	6.97495e+07	4.31731e+07	4.428e+07	2.60858e+07	7.40581e+07	5.71667e+07	6.60918e+07	7.48693e+07	5.73143e+07	1.3063	up	0.0150866	0.109217	1.00357	yes
NEG	NEG_871.686_9.7069	871.686	9.7069	SM 29:1;2O/13:1	74.39	C47H93N2O6P	Lipids and lipid-like molecules	Sphingolipids	NA	NA	NA	TG(18:3(9Z,12Z,15Z)/14:0/22:6(4Z,7Z,10Z,13Z,16Z,19Z));Trieleostearin;Glycerol 1,2-di-(9Z,11E,13Z-octadecatrienoate) 3-(8Z,11Z,13E-octadecatrienoate);TG(14:0/18:3(6Z,9Z,12Z)/22:6(4Z,7Z,10Z,13Z,16Z,19Z));TG(14:0/20:4(5Z,8Z,11Z,14Z)/20:5(5Z,8Z,11Z,14Z,17Z));TG(14:0/22:5(4Z,7Z,10Z,13Z,16Z)/18:4(6Z,9Z,12Z,15Z));TG(14:0/18:3(9Z,12Z,15Z)/22:6(4Z,7Z,10Z,13Z,16Z,19Z));TG(14:0/18:4(6Z,9Z,12Z,15Z)/22:5(4Z,7…	5.13079e+06	1.77582e+06	6.57598e+06	7.05382e+06	3.16241e+06	6.69044e+06	6.01387e+06	6.71383e+06	2.65623e+06	8.99578e+06	9.17004e+06	6.84992e+06	1.04579e+07	7.20832e+06	8.86557e+06	7.02419e+06	1.12434e+07	7.50956e+06	9.13039e+06	8.22316e+06	1.38775e+07	8.28736e+06	1.11627e+07	8.33223e+06	1.23102e+07	7.84875e+06	1.1523e+07	8.33294e+06	7.93308e+06	6.31823e+06	9.54792e+06	0.6617	down	0.00364088	0.0396299	1.40497	yes
NEG	NEG_761.58_9.1822	761.58	9.1822	SM 29:1;2O/5:0	88.56	C39H79N2O6P	Lipids and lipid-like molecules	Sphingolipids	NA	NA	NA	SM(d18:0/18:1(12Z)-2OH(9,10));DG(20:4(5Z,8Z,11Z,14Z)/24:1(15Z)/0:0);DG(20:4(8Z,11Z,14Z,17Z)/24:1(15Z)/0:0);DG(20:5(5Z,8Z,11Z,14Z,17Z)/24:0/0:0);DG(22:0/22:5(4Z,7Z,10Z,13Z,16Z)/0:0);DG(22:0/22:5(7Z,10Z,13Z,16Z,19Z)/0:0);DG(22:1(13Z)/22:4(7Z,10Z,13Z,16Z)/0:0);DG(22:4(7Z,10Z,13Z,16Z)/22:1(13Z)/0:0);DG(22:5(4Z,7Z,10Z,13Z,16Z)/22:0/0:0);DG(22:5(7Z,10Z,13Z,16Z,19Z)/22:0/0:0);DG(24:0/20:5(5Z,8Z,11Z,14Z,…	1.49909e+07	1.64146e+07	1.41087e+07	1.52123e+07	2.35279e+07	1.37263e+07	1.14758e+07	1.40048e+07	2.0533e+07	1.91043e+07	1.74938e+07	1.2122e+07	1.98631e+07	1.55886e+07	1.16668e+07	1.36026e+07	1.37936e+07	1.1941e+07	8.55793e+06	1.1653e+07	1.63182e+07	1.36801e+07	1.40941e+07	8.6875e+06	1.46391e+07	1.25615e+07	1.27841e+07	1.14313e+07	1.44135e+07	1.62976e+07	1.25293e+07	1.3008	up	0.00166675	0.0227334	1.02025	yes
POS	POS_785.585_9.0618	785.585	9.0618	SM(d18:0/20:4(6E,8Z,11Z,13E)-2OH(5S,15S))	71.68	C43H81N2O8P	Lipids and lipid-like molecules	Sphingolipids	NA	NA	NA	3b,12a-Dihydroxy-5a-cholanoic acid;3b,7a-Dihydroxy-5b-cholanoic acid;3a,7a-Dihydroxycholanoic acid;3a,12b-Dihydroxy-5b-cholanoic acid;3b,12a-Dihydroxy-5b-cholanoic acid;Allodeoxycholic acid;Allochenodeoxycholic acid;Chenodeoxycholic acid;Isohyodeoxycholic acid;Hyodeoxycholic acid;Murocholic acid;Ursodeoxycholic acid;7b,12a-Dihydroxycholanoic acid;7a,12b-dihydroxy-5b-Cholan-24-oic acid;Isodeoxycho…	8.42497e+07	1.16688e+08	1.52915e+08	1.13708e+08	4.99519e+07	5.21218e+08	9.64021e+07	1.08611e+08	2.01069e+08	1.13563e+08	1.23857e+08	3.42368e+08	1.30668e+08	1.23158e+08	4.1888e+08	3.04351e+08	2.01372e+08	2.88034e+08	1.89561e+08	1.27462e+08	1.81125e+08	1.21346e+08	1.26524e+08	3.13679e+08	2.93883e+08	1.57147e+08	3.34829e+08	1.63106e+08	1.96419e+08	1.62745e+08	2.30093e+08	0.7073	down	0.0261278	0.15604	1.26713	yes
NEG	NEG_699.341_4.2153	699.341	4.2153	SMGDG O-24:6_2:0	73.21	C35H56O12S	Lipids and lipid-like molecules	Glycerolipids	NA	NA	NA	Tyr-D-thr-gly-phe-leu-thr;Calonectrin;Millefin;Romergoline;5-((2-(Diethylamino)ethyl)amino)-8-hydroxy-6H-imidazo[4,5,1-de]acridin-6-one;Arctiopicrin;Carthamoside A1;N1,N5,N10-Tris-trans-p-coumaroylspermine	84606.3	2577.41	88159	364364	15715.1	170421	126636	252372	298978	48063.5	141789	134488	145937	45900.5	127907	283016	197338	1.18055e+06	1.06505e+06	82482.9	129044	204436	172458	424454	95687.4	305821	134485	185841	232450	137143	327756	0.4184	down	0.0254234	0.153765	1.75203	yes
POS	POS_601.262_5.3643	601.262	5.3643	SSR 241586 HCl	80.79	C32H42Cl2N4O3	Organoheterocyclic compounds	Oxazinanes	NA	NA	NA	Promazine 5-sulfoxide;Desmethylranitidine;Promethazine sulfoxide;N-succinyl-chitosan	873688	1.92557e+06	1.91363e+06	1.53535e+06	1.06216e+06	1.68126e+06	803748	1.23091e+06	1.17182e+06	788166	630089	2.5011e+06	3.09114e+06	1.47271e+06	1.21458e+06	1.63479e+06	4.90729e+06	2.40069e+06	4.79025e+06	1.08392e+06	1.56344e+06	1.10377e+06	1.49737e+06	3.71483e+06	2.00883e+06	2.41312e+06	6.89375e+06	2.58153e+06	2.08891e+06	1.47724e+06	2.70058e+06	0.547	down	0.0137655	0.102372	1.34364	yes
NEG	NEG_465.305_7.6074	465.305	7.6074	ST 27:1;O;S	79.16	C27H46O4S	Lipids and lipid-like molecules	Steroids and steroid derivatives	NA	NA	NA	Cholesterol sulfate	1.39033e+07	3.64713e+07	2.25339e+07	3.66486e+07	2.74865e+07	2.47517e+07	4.50275e+07	2.31319e+07	3.19309e+07	1.65261e+07	3.43017e+07	4.00564e+07	2.32596e+07	5.27431e+07	1.25278e+07	4.28504e+07	6.38512e+06	7.911e+07	6.93924e+06	1.20254e+07	1.43348e+07	1.00429e+07	2.64443e+07	1.8227e+07	1.57575e+07	1.96642e+07	3.12666e+07	1.50118e+07	2.64057e+07	3.06266e+07	2.21848e+07	1.3805	up	0.0256167	0.154575	1.25971	yes
POS	POS_300.142_4.2428	300.142	4.2428	Saxitoxin	76.17	C10H17N7O4	Phenylpropanoids and polyketides	Saxitoxins, gonyautoxins, and derivatives	HMDB0029368	C13757	NA	Saxitoxin;2,3-dimethylidenepentanedioylcarnitine;Bis(2-methoxyethyl) phthalate	36067	97715.2	88981.5	57358.8	36647.3	44602	37848.6	61145	40549.4	36550.2	5276.89	93285	147771	64444.5	94173.4	73728.7	262875	107952	216419	49407.8	94915.1	53306.6	56697.2	126414	104515	99529.9	254189	97176.7	90697.9	60588.7	120807	0.5015	down	0.00645257	0.0595059	1.64856	yes
POS	POS_225.109_3.797	225.109	3.797	Sebacate	97	C10H18O4	Lipids and lipid-like molecules	Fatty Acyls	HMDB0000792	C08277	NA	2,6-Diamino-9-(2-hydroxyethoxymethyl)purine;Sebacic acid;R-2-Hydroxy-3-methylbutanoic acid 3-Methylbutanoyl;Oxalic acid dibutyl ester;2-Ethylsuberic acid;Heptylmalonic acid;3-Methylazelaic acid;N-Lactoylisoleucine;(R)-6-(3-Methylpiperazin-1-yl)nicotinonitrile;1,4-Butanediol diglycidyl ether;Dihydrolipoamide;6-Amino-9H-purine-9-propanoic acid	934590	971916	300360	2.5148e+06	318793	404303	513828	2.28407e+06	309731	1.07442e+06	599868	496729	446606	255984	424379	315058	388097	375355	462235	380101	399884	261208	495715	500743	276773	327545	266507	439693	597832	816142	379521	2.1505	up	0.024406	0.150483	1.27895	yes
POS	POS_331.207_4.5413	331.207	4.5413	Ser Pro Lys	73.7	C14H26N4O5	NA	NA	NA	NA	NA	1,2,3-Tris(1-ethoxyethoxy)propane;(8R,9S,10S,13S,14S,17R)-16-Fluoro-17-hydroxy-10,13-dimethyl-1,2,4,5,6,7,8,9,11,12,14,15,16,17-tetradecahydrocyclopenta[a]phenanthren-3-one	4.78193e+06	5.0028e+06	3.8261e+06	5.62464e+06	3.47296e+06	3.44336e+06	4.76066e+06	9.37389e+06	1.12651e+07	7.12874e+06	8.19762e+06	4.40626e+06	6.91658e+06	7.83375e+06	2.73029e+06	3.10941e+06	2.795e+06	4.03086e+06	2.50606e+06	5.13878e+06	2.45574e+06	8.59097e+06	2.24135e+06	2.87666e+06	3.79555e+06	4.1985e+06	4.84757e+06	3.73987e+06	4.96754e+06	6.14531e+06	3.78976e+06	1.6216	up	0.00183162	0.0241802	1.3853	yes
NEG	NEG_380.257_6.3651	380.257	6.3651	Sphinganine-phosphate	86.16	C18H40NO5P	Lipids and lipid-like molecules	Sphingolipids	NA	NA	NA	Sphinganine 1-phosphate;(2-Amino-3-hydroxyoctadecyl) dihydrogen phosphate	1.49341e+06	1.36349e+06	1.39993e+06	1.48306e+06	1.11297e+06	1.23984e+06	1.70587e+06	1.62529e+06	1.85241e+06	889155	1.29013e+06	1.35468e+06	1.2153e+06	1.33397e+06	2.1428e+06	2.6043e+06	2.15041e+06	1.76074e+06	2.48364e+06	2.09912e+06	1.82991e+06	2.9087e+06	2.72952e+06	1.72213e+06	1.44072e+06	2.15268e+06	2.31618e+06	2.33975e+06	1.78715e+06	1.38282e+06	2.19147e+06	0.631	down	9.06267e-07	9.65138e-05	1.60267	yes
POS	POS_382.271_6.36	382.271	6.36	Sphinganine-phosphate	83.7	C18H40NO5P	Lipids and lipid-like molecules	Sphingolipids	NA	NA	NA	Sphinganine 1-phosphate;(2-Amino-3-hydroxyoctadecyl) dihydrogen phosphate;N-Acetylsphinganine;Quinestrol	3.02641e+06	2.81592e+06	2.39144e+06	2.48647e+06	2.05148e+06	2.33201e+06	3.42528e+06	3.20642e+06	3.22776e+06	2.12172e+06	1.80867e+06	2.26328e+06	1.14744e+06	1.98437e+06	3.40399e+06	4.01814e+06	3.89906e+06	3.87572e+06	4.09469e+06	4.18109e+06	3.79957e+06	5.18949e+06	4.93678e+06	2.86255e+06	2.75773e+06	3.57791e+06	3.43565e+06	4.23032e+06	3.16255e+06	2.44919e+06	3.87591e+06	0.6319	down	2.62482e-05	0.00113816	1.57094	yes
NEG	NEG_350.209_5.6356	350.209	5.6356	Sphingosine 1-phosphate (d16:1-P)	97	C16H34NO5P	Organic acids and derivatives	Organic phosphoric acids and derivatives	HMDB0060061	NA	NA	Sphingosine 1-phosphate (d16:1-P);Decanoylcarnitine;6-Methylnonanoylcarnitine;5-Methylnonanoylcarnitine;8-Methylnonanoylcarnitine;7-Methylnonanoylcarnitine;4-Methylnonanoylcarnitine;3-Methylnonanoylcarnitine;N-Myristoyl Serine;N-Propionylprocainamide;12,13(S)-epoxylinolenate;12-oxo-cis-10,15-phytodienoate	676312	540331	565297	897022	428051	904330	992939	1.06518e+06	724791	571076	481903	646449	420315	372079	990194	2.04744e+06	1.3682e+06	898422	1.64302e+06	1.11e+06	1.02038e+06	1.62918e+06	1.09652e+06	774626	1.63688e+06	1.50545e+06	1.02589e+06	1.89828e+06	997520	663291	1.33175e+06	0.4981	down	3.61271e-06	0.000282897	1.93772	yes
NEG	NEG_378.241_6.214	378.241	6.214	Sphingosine-1-phosphate	88.72	C18H38NO5	Lipids and lipid-like molecules	Sphingolipids	HMDB0000277	C06124	map00600(Sphingolipid metabolism);map01100(Metabolic pathways);map04020(Calcium signaling pathway);map04071(Sphingolipid signaling pathway);map04072(Phospholipase D signaling pathway);map04080(Neuroactive ligand-receptor interaction);map04148(Efferocytosis);map04371(Apelin signaling pathway);map04666(Fc gamma R-mediated phagocytosis);map05152(Tuberculosis)	Sphingosine 1-phosphate;N-palmitoyl-phosphoethanolamine;C18-Sphingosine 1-phosphate; D-erythro-Sphingosine-1-phosphate;Dodecanoylcarnitine;8-Methylundecanoylcarnitine;7-Methylundecanoylcarnitine;6-Methylundecanoylcarnitine;4-Methylundecanoylcarnitine;5-Methylundecanoylcarnitine;10-Methylundecanoylcarnitine;9-Methylundecanoylcarnitine;3-Methylundecanoylcarnitine;N-Palmitoyl Serine;N-Hexadecanoyl-s…	8.81841e+06	7.38065e+06	7.82268e+06	7.95027e+06	6.63944e+06	8.87435e+06	8.59825e+06	1.01254e+07	8.84814e+06	5.77214e+06	6.53775e+06	8.41096e+06	6.86182e+06	7.66006e+06	1.3485e+07	1.53921e+07	1.36387e+07	1.22558e+07	1.49322e+07	1.56028e+07	1.21312e+07	1.71245e+07	1.50373e+07	1.29385e+07	1.22338e+07	1.3762e+07	1.37331e+07	1.65741e+07	1.10408e+07	7.8786e+06	1.42029e+07	0.5547	down	1.86968e-11	3.11115e-08	1.97193	yes
POS	POS_380.254_6.2099	380.254	6.2099	Sphingosine-1-phosphate	79.49	C18H38NO5	Lipids and lipid-like molecules	Sphingolipids	HMDB0000277	C06124	map00600(Sphingolipid metabolism);map01100(Metabolic pathways);map04020(Calcium signaling pathway);map04071(Sphingolipid signaling pathway);map04072(Phospholipase D signaling pathway);map04080(Neuroactive ligand-receptor interaction);map04148(Efferocytosis);map04371(Apelin signaling pathway);map04666(Fc gamma R-mediated phagocytosis);map05152(Tuberculosis)	Sphingosine 1-phosphate;N-palmitoyl-phosphoethanolamine;C18-Sphingosine 1-phosphate; D-erythro-Sphingosine-1-phosphate;Stearoylglycine;N-Palmitoyl GABA;N-Myristoyl Isoleucine;N-Myristoyl Leucine;N-(1,3-Dihydroxyoctadec-4-en-2-yl)acetamide;Leu-Leu-Leu;Pentolame;(5alpha)-23-Methyl-4-aza-21-norchol-1-ene-3,20-dione;Calpeptin;gamma-Secretase Inhibitor XII	1.66306e+07	1.35164e+07	1.41165e+07	1.36361e+07	1.25403e+07	1.74003e+07	1.62318e+07	1.86769e+07	1.7276e+07	1.15168e+07	1.2613e+07	1.5384e+07	1.3139e+07	1.52615e+07	2.45071e+07	2.77293e+07	2.67006e+07	2.47416e+07	2.70546e+07	2.81854e+07	2.4006e+07	3.32445e+07	2.79319e+07	2.40222e+07	2.27921e+07	2.65457e+07	2.48964e+07	2.9523e+07	2.07078e+07	1.48528e+07	2.65629e+07	0.5592	down	1.08612e-11	2.40973e-08	1.97021	yes
POS	POS_465.344_6.0875	465.344	6.0875	Sphingosylphosphoryl choline	88.34	C23H49N2O5P	Lipids and lipid-like molecules	Sphingolipids	NA	NA	NA	sphingosylphosphorylcholine	967809	493236	595609	627741	878068	420073	649436	486483	657651	594294	551779	406180	674552	705969	381677	311395	335658	286136	564945	472135	311645	435596	549811	214466	325152	358650	297288	594342	505278	622063	388492	1.6012	up	8.51544e-05	0.00281284	1.51831	yes
NEG	NEG_311.169_6.7061	311.169	6.7061	TRIPTOPHENOLIDE	71.43	C20H24O3	Lipids and lipid-like molecules	Steroids and steroid derivatives	NA	NA	NA	N-Undecylbenzenesulfonic acid	6.29986e+07	3.00107e+07	3.57684e+07	8.54443e+07	3.02216e+07	4.19278e+07	3.07658e+07	7.73481e+07	3.61521e+07	2.6443e+07	5.57091e+07	3.08266e+07	2.54332e+07	2.21885e+07	3.06529e+07	3.64052e+07	3.1133e+07	2.06918e+07	3.57581e+07	1.47789e+07	2.52191e+07	1.26559e+07	3.92603e+07	2.94898e+07	1.88273e+07	4.36343e+07	4.78483e+07	2.39271e+07	3.57686e+07	4.22313e+07	2.93058e+07	1.4411	up	0.0367116	0.192783	1.07881	yes
NEG	NEG_514.283_4.735	514.283	4.735	Taurocholic acid	75.5	C26H45NO7S	Lipids and lipid-like molecules	Steroids and steroid derivatives	HMDB0000036	C05122	map00120(Primary bile acid biosynthesis);map00121(Secondary bile acid biosynthesis);map00430(Taurine and hypotaurine metabolism);map01100(Metabolic pathways);map04976(Bile secretion);map04979(Cholesterol metabolism)	Tauroursocholic acid;Tauro-b-muricholic acid;Taurohyocholate;Candoxatril;2-[(3alpha,7alpha,12alpha-Trihydroxy-24-oxocholane-24-yl)amino]ethanesulfonic acid;Tauro-alpha-muricholic acid;3-(1-((4-Carboxycyclohexyl)carbamoyl)cyclopentyl)-2-(2-methoxyethoxymethyl)propanoic acid 5-indanyl ester;Artefenomel	397303	794098	431369	1.67112e+06	78789.5	1.0269e+06	704028	402027	232026	751641	282581	368460	3.64923e+06	514898	630999	270393	70256.4	245328	330736	76755.3	184128	181251	348728	79310.1	109900	104416	721664	140779	528540	807462	249617	3.2348	up	0.00296114	0.0341287	2.01542	yes
POS	POS_533.323_4.7301	533.323	4.7301	Taurocholic acid	71.27	NA	NA	NA	NA	NA	NA	28-Homobrassinolide;DG(8:0/18:2(10E,12Z)+=O(9)/0:0);DG(18:2(10E,12Z)+=O(9)/8:0/0:0);DG(8:0/0:0/18:2(10E,12Z)+=O(9));DG(18:2(10E,12Z)+=O(9)/0:0/8:0);DG(8:0/18:2(9Z,11E)+=O(13)/0:0);DG(18:2(9Z,11E)+=O(13)/8:0/0:0);DG(8:0/0:0/18:2(9Z,11E)+=O(13));DG(18:2(9Z,11E)+=O(13)/0:0/8:0);DG(8:0/18:3(10,12,15)-OH(9)/0:0);DG(18:3(10,12,15)-OH(9)/8:0/0:0);DG(8:0/0:0/18:3(10,12,15)-OH(9));DG(18:3(10,12,15)-OH(9)/…	224871	466056	295934	1.43774e+06	24694.5	791883	547780	306305	155146	519940	224052	301165	2.7304e+06	399790	450667	90609.4	418007	188829	57632.1	50546.3	112632	131072	41944.7	37544.8	86590.3	74001.1	520908	51436.7	383506	601840	165173	3.6437	up	0.00361063	0.039421	2.16046	yes
POS	POS_522.286_5.0465	522.286	5.0465	Taurodeoxycholic acid	83.36	C26H45NO6S	Lipids and lipid-like molecules	Steroids and steroid derivatives	HMDB0000896	C05463	NA	LysoPS(18:2(9Z,12Z)/0:0);Batrachotoxinin A 20-alpha-benzoate;Tauroursodeoxycholic acid;Taurodeoxycholic acid;Chenodeoxycholyltaurine;Beloranib;(3S,7E,9R)-4,7-Megastigmadiene-3,9-diol 9-[apiosyl-(1-&gt;6)-glucoside];Blumenol C O-[apiosyl-(1-&gt;6)-glucoside];Betamethasone 17,21-dipropionate	950179	501105	1.00994e+06	3.46758e+06	82504	1.83758e+06	914641	652855	317876	1.17632e+06	677681	551988	3.20934e+06	452775	223858	360702	147963	164248	123598	94657.7	540593	270636	53136.5	240736	120910	119746	758152	263464	688742	1.12874e+06	248743	4.5378	up	0.000214425	0.00558597	2.54673	yes
NEG	NEG_223.17_7.2625	223.17	7.2625	Terpinyl isobutyrate	72.55	C14H24O2	Lipids and lipid-like molecules	Prenol lipids	HMDB0032524	NA	NA	Linalyl isobutyrate;Linalyl butyrate;Ethyl (2E,6Z)-dodecadienoate;alpha-Terpineol butanoate;Isobornyl isobutyrate;Terpinyl isobutyrate;Allyl undecylenate;2-Propenyl cyclohexanepentanoate;Bornyl butyrate;Neryl butyrate;Geranyl 2-methylpropanoate;Lavandulyl butyrate;norspermine;(Z)-4-Heptenal;3-Hepten-2-one;(E)-4-Hepten-2-one;2-Hepten-4-one;2-Methylcyclohexanone;4-Methylcyclohexanone;5-Methyl-3-hex…	1.48148e+07	1.1896e+07	3.82208e+07	1.4007e+07	1.91278e+07	7.89409e+07	1.04456e+07	1.45597e+07	8.93769e+07	1.41978e+07	8.22887e+06	1.30007e+08	6.32274e+06	5.57255e+06	1.84176e+08	4.28575e+07	1.64877e+08	6.31612e+07	6.75443e+07	6.49999e+07	4.84674e+07	5.27821e+07	5.30891e+07	1.46005e+08	1.53501e+08	6.87683e+07	1.46745e+08	4.13267e+07	6.26435e+07	3.25513e+07	9.27358e+07	0.351	down	0.000141896	0.00412427	2.65403	yes
NEG	NEG_355.264_8.6216	355.264	8.6216	Tetracosahexaenoic acid	78.12	C24H36O2	Lipids and lipid-like molecules	Fatty Acyls	HMDB0002007	NA	NA	Tetracosahexaenoic acid;6,9,12,15,18,21-Tetracosahexaenoic acid;Tetracosahexaenoic acid, n-3;Docosa-4,7,10,13,16,19-hexaenoic acid ethyl ester;2,4,6,8,10,12-Docosahexaenoic acid, ethyl ester;Tetracosahexaenic acid;Propofol;Tricycloekasantal;4-Methyl-1-phenyl-2-pentanol;3-Methyl-1-phenyl-3-pentanol;2,5-Diisopropylphenol;11-Methyl-7-oxatetracyclo[6.3.1.01,6.04,11]dodecane;7-Isopropyl-5-methylbicycl…	1.75442e+06	654112	1.83644e+06	887612	589466	4.59462e+06	803615	1.46433e+06	1.52512e+06	486628	309773	7.91483e+06	555286	242621	2.19657e+06	3.07406e+06	1.12781e+06	1.67415e+06	2.39691e+06	2.79272e+06	2.60653e+06	3.03265e+06	1.96618e+06	4.37283e+06	3.56404e+06	2.3088e+06	2.62881e+06	1.90497e+06	2.11664e+06	1.68706e+06	2.54622e+06	0.6626	down	0.00672562	0.061407	1.87581	yes
NEG	NEG_357.278_9.0382	357.278	9.0382	Tetracosapentaenoic acid (24:5n-6)	85.02	C24H38O2	Lipids and lipid-like molecules	Fatty Acyls	HMDB0006322	NA	NA	Tetracosapentaenoic acid (24:5n-6);Tetracosapentaenoic acid (24:5n-3);1-Phenyl-1,3-octadecanedione;9,12,15,18,21-Tetracosapentaenoic acid;Tetracosapentenoic acid;4-N-[1-(Dimethylamino)ethyl]benzene-1,4-diamine	1.79649e+06	553520	810537	435569	689767	2.94293e+06	1.41947e+06	1.6869e+06	1.61285e+06	511828	376491	7.73032e+06	1.27162e+06	431291	2.71424e+06	2.24689e+06	1.01392e+06	1.80508e+06	2.633e+06	693265	1.50822e+06	1.49193e+06	2.67382e+06	4.00813e+06	4.46441e+06	2.21447e+06	2.33359e+06	1.7564e+06	1.92239e+06	1.59068e+06	2.2541e+06	0.7057	down	0.0236459	0.147366	1.60836	yes
POS	POS_366.262_5.4945	366.262	5.4945	Tetradeca-4,7,10-trienoylcarnitine	82.43	C21H35NO4	Lipids and lipid-like molecules	Fatty Acyls	NA	NA	NA	Tetradeca-7,9,11-trienoylcarnitine;Tetradeca-3,5,7-trienoylcarnitine;Tetradeca-8,10,12-trienoylcarnitine;Tetradeca-4,7,10-trienoylcarnitine;Tetradeca-4,6,8-trienoylcarnitine;Tetradeca-6,9,12-trienoylcarnitine;Tetradeca-5,7,9-trienoylcarnitine;Tetradeca-5,8,11-trienoylcarnitine;Tetradeca-2,5,8-trienoylcarnitine;Tetradeca-6,8,10-trienoylcarnitine;(4Z,10Z,12E)-Tetradeca-4,10,12-trienoylcarnitine;Tet…	2.5952e+06	2.23768e+06	1.30681e+06	1.45409e+06	1.07702e+06	2.70742e+06	2.34946e+06	2.49356e+06	4.70778e+06	2.32068e+06	1.41411e+06	7.12411e+06	761700	298552	1.01563e+07	3.94111e+06	8.23617e+06	2.81344e+06	4.06255e+06	4.68246e+06	2.54339e+06	3.82678e+06	3.21239e+06	6.03409e+06	4.40233e+06	3.90334e+06	5.41342e+06	5.04195e+06	3.61135e+06	2.3463e+06	4.87641e+06	0.4812	down	0.000914029	0.0149847	2.02979	yes
POS	POS_538.259_5.0453	538.259	5.0453	Thr Asp Arg Phe	70.49	C23H35N7O8	NA	NA	NA	NA	NA	Tauroursodeoxycholic acid;Taurodeoxycholic acid;Chenodeoxycholyltaurine;Beloranib;Beclometasone dipropionate;Physalolactone C;(11beta,16beta)-9-Chloro-11-hydroxy-16-methyl-17,21-bis(1-oxopropoxy)pregna-1,4-diene-3,20-dione;Alclometasone dipropionate	141510	66812.4	137095	579640	14469.4	296703	128423	1.70471e+06	58117.4	209303	102253	90533.7	605359	71774.7	82438.8	46423.9	7543.65	84708.8	320476	130348	91315.4	57843.9	117562	4159.43	45176.3	12714.9	142084	28074.6	192056	300478	83633.5	3.5928	up	0.0211752	0.137192	1.88654	yes
POS	POS_219.186_5.9031	219.186	5.9031	Tributylphosphine oxide	96.36	C12H27OP	Organophosphorus compounds	Organic phosphines and derivatives	NA	NA	NA	1,2,5-Trimethyl-1H-pyrrole;TRIBUTYLPHOSPHINE OXIDE	8.65858e+06	20339.8	530889	120517	9.18427e+06	182286	779970	63623.1	437832	21453.9	5.1112e+06	46254.9	141169	17697.2	1.04756e+07	1.29665e+06	691871	1.26441e+06	100540	7.13449e+06	520070	1.92771e+06	9.58577e+06	438114	2.10264e+06	6.38995e+06	108934	637469	2.42822e+06	1.80829e+06	3.04816e+06	0.5932	down	0.0325639	0.181225	2.39071	yes
NEG	NEG_134.894_6.7013	134.894	6.7013	Trichlorofluoromethane	97	CCl3F	Organohalogen compounds	Alkyl halides	NA	NA	NA	NA	2.92975e+06	2.2035e+06	2.0542e+06	2.17979e+06	2.12955e+06	2.63838e+06	4.034e+06	1.75863e+06	2.79511e+06	7.94491e+06	3.94366e+06	3.94168e+06	2.81516e+06	3.35835e+06	1.84824e+06	3.28584e+06	1.94942e+06	3.24027e+06	1.78161e+06	1.71053e+06	1.64281e+06	1.78231e+06	1.89371e+06	3.34984e+06	1.85829e+06	1.872e+06	1.64535e+06	2.04998e+06	2.6656e+06	3.19476e+06	2.13644e+06	1.4954	up	0.00904575	0.0758294	1.12123	yes
NEG	NEG_211.17_7.3452	211.17	7.3452	Tridec-3-enoic acid	96.99	C13H24O2	Lipids and lipid-like molecules	Fatty Acyls	NA	NA	NA	10-Undecenyl acetate;Methyl (E)-2-dodecenoate;Coniferan;(&#177;)-(E)-3-Methyl-4-decen-1-yl acetate;Ethyl 10-undecenoate;Rhodinyl propionate;Citronellyl propionate;1-Ethylhexyl tiglate;2,6,10,10-Tetramethyl-1-oxaspiro[4.5]decan-6-ol;1,1-Diethoxy-2,6-nonadiene;4-(3-Hydroxybutyl)-3,3,5-trimethylcyclohexanone;Oxacyclotetradecan-2-one;trans-2-trans-4-Nonadiene;1,1'-Ethylidenebis-cyclopentane;(E,Z)-2,4…	1.61787e+06	2.46028e+06	7.61342e+06	2.44411e+06	3.74148e+06	1.12845e+07	7.68127e+06	6.55739e+06	1.2671e+07	7.82754e+06	4.3433e+06	3.55971e+07	2.84035e+06	3.0093e+06	2.6176e+07	2.37855e+07	2.04919e+07	9.4624e+06	1.86104e+07	9.51599e+06	1.65846e+07	1.39641e+07	1.52397e+07	1.36689e+07	3.34183e+07	1.28066e+07	2.90476e+07	1.78851e+07	1.32266e+07	7.83493e+06	1.86184e+07	0.4208	down	0.00014982	0.00427983	2.4229	yes
NEG	NEG_463.343_7.7003	463.343	7.7003	Trihydroxycoprostanoic acid	88.65	C28H48O5	Lipids and lipid-like molecules	Steroids and steroid derivatives	HMDB0000601	NA	NA	Trihydroxycoprostanoic acid;2-Deoxybrassinolide;Castasterone;3,24-Diepicastasterone;Demissidine;7-a,25-Dihydroxycholesterol;7-a,27-Dihydroxycholesterol;20a,22b-Dihydroxycholesterol;17a,20a-Dihydroxycholesterol;7a,12a-Dihydroxy-5a-cholestan-3-one;7a,12a-Dihydroxy-5b-cholestan-3-one;3a,7a-Dihydroxy-5b-cholestan-26-al;(24R)-Cholest-5-ene-3-beta,7-alpha,24-triol;(24S)-7alpha,24-Dihydroxycholesterol;7…	5.32349e+07	8.58675e+07	3.24576e+07	8.21197e+07	6.0318e+07	5.53442e+07	1.04017e+08	7.83429e+07	8.71445e+07	7.62539e+07	6.91817e+07	9.77638e+07	8.17925e+07	6.32816e+07	8.60484e+07	8.34248e+07	1.24229e+08	2.64242e+08	9.9543e+07	4.73961e+07	1.22033e+08	5.49101e+07	7.12955e+07	2.05334e+08	9.95889e+07	7.44277e+07	2.16101e+08	7.30442e+07	9.45978e+07	7.33657e+07	1.1583e+08	0.6334	down	0.0319382	0.178873	1.04868	yes
NEG	NEG_165.056_3.5013	165.056	3.5013	Tropic acid	91.18	C9H10O3	Organic acids and derivatives	Hydroxy acids and derivatives	NA	NA	NA	D-Phenyllactic acid;L-3-Phenyllactic acid;Phenyllactic acid;4-Methoxyphenylacetic acid;Desaminotyrosine;3-Phenoxypropionic acid;Homovanillin;Ethyl vanillin;Ethyl salicylate;3,4-Dihydroxyphenylacetone;Guaicyl acetate;3,4-Dimethoxybenzaldehyde;Ethylparaben;Methyl 2-methoxybenzoate;Methyl 4-methoxybenzoate;3-(2-Hydroxyphenyl)propanoic acid;Ipomeanine;4-Methoxybenzyl formate;3-Hydroxy-1-(4-hydroxyphe…	2.0953e+06	641463	490333	752631	488173	617364	987864	787073	683456	453648	1.19731e+06	460382	1.23943e+06	1.44652e+06	517069	632336	441614	626902	386816	279806	918142	666014	396958	441203	484215	615955	352246	502743	700106	881496	518716	1.6994	up	0.00567997	0.0546328	1.32628	yes
POS	POS_333.155_3.4487	333.155	3.4487	Trp Gln	70.29	C16H20N4O4	NA	NA	NA	NA	NA	3,4-Dihydroxyphenylacetamidine;N-(2-Hydroxyethyl)nicotinamide;Glutaminyltryptophan;Tryptophyl-Glutamine;Tryptophyl-Gamma-glutamate;1-p-Menthen-3-one;Proparacaine;Propoxycaine;O-Desmethylquinidine;Antramycin;N-(5-Fluoro-2-piperidin-1-ylphenyl)pyridine-4-carbothioamide	67482.9	64826.9	43890.7	48221.9	23022	18057.8	151556	341710	133395	7648.66	4206.56	215690	143689	25791.4	186138	244279	317204	267460	460178	100143	106008	129546	156110	592482	199448	169752	244953	263403	168796	92085	245508	0.3751	down	0.000968701	0.015575	2.53437	yes
NEG	NEG_359.295_9.7069	359.295	9.7069	URSOCHOLANIC ACID	86.15	C24H40O2	Lipids and lipid-like molecules	Steroids and steroid derivatives	NA	NA	NA	Tetracosatetraenoic acid (24:4n-6);1-Hydroxy-1-phenyl-3-octadecanone;3-Hydroxy-1-phenyl-1-octadecanone;5beta-Cholanic acid;Homodihydrojasmone;2-trans-6-cis-Dodecadienal;cis-Quinceoxepane;Tricycloekasantalol;(2E,4E)-2,4-Dodecadienal	1.79323e+06	1.26247e+06	3.78863e+06	1.20024e+06	2.08074e+06	4.98855e+06	1.33247e+06	1.69895e+06	5.10537e+06	1.37259e+06	1.13001e+06	3.41157e+06	1.91847e+06	1.10417e+06	3.04572e+06	2.45152e+06	4.03963e+06	5.28648e+06	3.8593e+06	4.1989e+06	4.22401e+06	3.05845e+06	5.45714e+06	2.95409e+06	6.18827e+06	3.30349e+06	3.45062e+06	4.53496e+06	3.15143e+06	2.2991e+06	4.00376e+06	0.5742	down	0.000569475	0.0108608	1.74242	yes
NEG	NEG_243.062_1.4771	243.062	1.4771	Uridine	78.69	C9H12N2O6	Nucleosides, nucleotides, and analogues	Pyrimidine nucleosides	HMDB0000296	C00299	map00240(Pyrimidine metabolism);map01100(Metabolic pathways);map01232(Nucleotide metabolism);map02010(ABC transporters)	Uridine;Pseudouridine;1-[(2R,3S,5R)-3,4-Dihydroxy-5-(hydroxymethyl)oxolan-2-yl]pyrimidine-2,4-dione;1-[(2R,3R,4S,5R)-3,4-Dihydroxy-5-(hydroxymethyl)oxolan-2-yl]oxypyrimidin-2-one;Ethyl beta-D-glucopyranoside;Dambonitol;Ethyl glucoside;Ethyl beta-D-fructofuranoside;Imidazotetrazine;Mimosine;Trimidox	2.8107e+06	4.32372e+06	3.99869e+06	2.85813e+06	1.0221e+07	5.79106e+06	6.42655e+06	3.1011e+06	8.69665e+06	7.04326e+06	3.38218e+06	7.13019e+06	4.30612e+06	5.24752e+06	5.71641e+06	9.9452e+06	1.14817e+07	8.85052e+06	8.07953e+06	5.76572e+06	5.70003e+06	6.19911e+06	8.50769e+06	6.64896e+06	9.58465e+06	7.97946e+06	6.50131e+06	8.21971e+06	6.58989e+06	5.3812e+06	7.79857e+06	0.69	down	0.00301329	0.0346187	1.29109	yes
NEG	NEG_211.036_5.159	211.036	5.159	Urolithin B	80.19	C13H8O3	Phenylpropanoids and polyketides	Coumarins and derivatives	HMDB0013696	NA	NA	N-phosphocreatinate(2-);2-Isopropylmalic acid;2,3-Dimethyl-3-hydroxyglutaric acid;3-Isopropylmalic acid;(&#177;)-Glycerol 1,2-diacetate;3-Nitrobenzaldoxime	1.31911e+06	1.96367e+06	1.05426e+06	741811	1.53542e+06	740382	1.87389e+06	433503	1.41216e+06	952852	845817	774170	1.33027e+06	867572	641016	89418.6	350797	1.05916e+06	550135	866080	708886	658978	592462	860810	497260	638702	405313	475007	865676	1.13178e+06	599573	1.8876	up	0.00200527	0.0259166	1.63654	yes
POS	POS_205.126_1.2762	205.126	1.2762	Val Ser	83.54	C8H16N2O4	NA	NA	NA	NA	NA	Hexyl 3-mercaptobutanoate;(S)-3-Mercaptohexyl butyrate;3-Mercaptohexyl butyrate	6.19239e+06	4.86514e+06	4.11966e+06	5.98103e+06	3.91351e+06	5.69129e+06	6.00048e+06	3.40026e+06	8.66231e+06	6.48685e+06	6.38254e+06	6.01705e+06	1.09251e+06	1.45075e+06	1.51243e+06	2.1654e+06	1.62905e+06	2.56263e+06	1.67736e+06	1.8555e+06	2.38523e+06	2.1337e+06	1.52204e+06	2.2977e+06	1.69142e+06	1.73068e+06	1.18935e+06	1.85909e+06	3.44526e+06	5.01827e+06	1.87226e+06	2.6803	up	6.79932e-05	0.00238819	2.22259	yes
POS	POS_230.247_6.229	230.247	6.229	Xestoaminol C	73.35	C14H31NO	Organic nitrogen compounds	Organonitrogen compounds	NA	NA	NA	Xestoaminol C;2-Tetradecanone;12-Methyltridecanal;Tetradecanal	6.14154e+06	4.35401e+06	1.64587e+07	4.65151e+06	5.406e+06	3.77216e+06	6.38454e+06	6.50878e+06	3.39646e+06	4.90178e+06	7.63881e+06	3.52373e+06	4.49183e+06	4.70675e+06	4.2349e+06	3.49897e+06	3.66445e+06	3.39428e+06	3.9486e+06	4.66159e+06	3.23679e+06	3.82007e+06	3.4629e+06	4.14286e+06	3.4071e+06	3.42174e+06	3.33411e+06	3.82474e+06	4.79963e+06	5.88118e+06	3.71808e+06	1.5818	up	0.00442551	0.0454571	1.2001	yes
POS	POS_583.253_6.0117	583.253	6.0117	biliverdin	90.13	C33H34N4O6	Organoheterocyclic compounds	Tetrapyrroles and derivatives	NA	NA	NA	Seryltryptophan;Tryptophyl-Serine;Biliverdin;21H-Biline-8,12-dipropanoicacid, 3,18-diethenyl-1,19,22,24-tetrahydro-2,7,13,17-tetramethyl-1,19-dioxo-;Azelnidipine;3-O-(1-Benzhydrylazetidin-3-yl) 5-O-propan-2-yl 2-amino-6-methyl-4-(3-nitrophenyl)-3,4-dihydropyridine-3,5-dicarboxylate;(3Z)-phytochromobilin;(2-Amino-3-methylphenyl)-[4-[4-[[2-(3-chlorophenyl)sulfonylphenyl]methyl]piperidin-1-yl]piperi…	2.21106e+06	2.97291e+06	5.19821e+06	2.6521e+06	2.50376e+06	3.11821e+06	1.54658e+06	1.97192e+06	2.35891e+06	1.80307e+06	1.52786e+06	4.07262e+06	5.32093e+06	2.59002e+06	4.77356e+06	2.58834e+06	6.6124e+06	4.37902e+06	6.38542e+06	1.91318e+06	2.88679e+06	1.81208e+06	2.83513e+06	5.58045e+06	3.45809e+06	3.92764e+06	1.10218e+07	4.0319e+06	3.64478e+06	2.8463e+06	4.44327e+06	0.6406	down	0.0267418	0.158703	1.11199	yes
NEG	NEG_253.217_9.7611	253.217	9.7611	cis-7-Hexadecenoic Acid	97	C16H30O2	Lipids and lipid-like molecules	Fatty Acyls	NA	NA	NA	Hypogeic acid;Trans-Hexa-dec-2-enoic acid;Palmitelaidic acid;(E)-6-Hexadecenoic acid;5-Dodecyldihydro-2(3H)-furanone;15-Hexadecanolide;(Z)-5-Hexadecenoic acid;(E)-3-Hexadecenoic acid;(Z)-13-Hexadecenoic acid;(E)-11-Hexadecenoic acid;Citronellyl hexanoate;(Z)-14-Methyl-6-pentadecenoic acid;15-Hexadecenoic acid;9-Hexadecenoic acid, (9Z)-;Dodecyl methacrylate;Sapienic acid;Cadinene;Guaiane	1.09223e+06	165298	199750	757529	1.0305e+06	1.95907e+06	718456	193127	2.06873e+06	612571	477222	1.90614e+06	190560	502630	3.00882e+06	1.49643e+06	3.39843e+06	1.56104e+06	1.67268e+06	1.73028e+06	2.61114e+06	1.34104e+06	2.17638e+06	3.5679e+06	3.04355e+06	1.47154e+06	4.62085e+06	2.19909e+06	1.63475e+06	848130	2.42137e+06	0.3503	down	9.43064e-05	0.0030471	2.54549	yes
POS	POS_416.315_4.7786	416.315	4.7786	dopamine-C18:2	95.76	C26H41NO3	Benzenoids	Phenols	NA	NA	NA	N-Eicosapentaenoyl Isoleucine;N-Eicosapentaenoyl Leucine;N-Linoleoyl Isoleucine;N-Linoleoyl Leucine;Benzotest	71285.1	267706	1.1681e+06	9.36104e+06	2.71661e+06	791221	5.84774e+06	1.94743e+07	245277	1.23361e+06	9.05514e+06	94988	7.63812e+06	286525	2.71684e+06	3.32139e+06	2.7268e+06	5.53379e+06	1.02462e+07	5.73065e+06	1.19063e+07	1.95772e+06	9.533e+06	5.63399e+06	9.32159e+06	3.79777e+06	9.40374e+06	4.19669e+06	5.15279e+06	4.16083e+06	6.14475e+06	0.6771	down	0.0139541	0.103486	2.21139	yes
POS	POS_264.048_1.3418	264.048	1.3418	ethyl 2-[(2-chlorophenyl)carbonylamino]acetate	97	C11H12ClNO3	Benzenoids	Benzene and substituted derivatives	NA	NA	NA	Miloxacin;GRK2 Inhibitor;Aciclovir;Ethiofencarb;METHIOCARB;2,4-Dihydroxy-6,7-dimethoxy-2H-1,4-benzoxazin-3(4H)-one;2,4-Dihydroxy-7,8-dimethoxy-2H-1,4-benzoxazin-3(4H)-one;Oxydemeton-methyl;urea citrate	70471.3	168268	98837.2	55864.4	502534	92207.5	86280.1	597991	637320	208716	783147	124555	3.59144e+07	3.58299e+07	93232.2	71048.6	105323	84645.1	103731	134769	93112.1	104098	113870	73782.6	72165.6	97436.2	103739	80311.3	2.7322e+06	5.36932e+06	95090.3	56.4655	up	0.0227141	0.143236	2.1756	yes
POS	POS_600.254_5.3476	600.254	5.3476	ferrioxamine A1 + Fe (M-2H+Fe)	78.02	NA	NA	NA	NA	NA	NA	Dapitant;Ergocornine	925699	3.24304e+06	3.47166e+06	2.80226e+06	1.30874e+06	1.81004e+06	911682	1.09734e+06	1.14024e+06	1.27579e+06	805436	2.54781e+06	3.29073e+06	1.54025e+06	3.17084e+06	2.32368e+06	4.50051e+06	3.49635e+06	7.09255e+06	952219	2.5042e+06	974913	1.39526e+06	5.09014e+06	1.89826e+06	2.43407e+06	1.07881e+07	2.34828e+06	2.68357e+06	1.86934e+06	3.49781e+06	0.5344	down	0.0345746	0.187539	1.23784	yes
NEG	NEG_309.206_6.4115	309.206	6.4115	methyl (2E,4E,8E)-7,13-dihydroxy-4,8,12-trimethyltetradeca-2,4,8-trienoate	79.38	C18H30O4	Lipids and lipid-like molecules	Prenol lipids	NA	NA	NA	12(13)Ep-9-KODE;(9Z,11R,12S,13S,15Z)-12,13-Epoxy-11-hydroxy-9,15-octadecadienoic acid;Sterebin A;Auxin b;Octadeca-2,4-dienedioic acid;9-Oxo-11-(3-pentyloxiran-2-YL)undec-10-enoic acid;13(S)-Hydroperoxylinolenic acid;(11R,12S,13S)-Epoxy-hydroxyoctadeca-cis-9-cis-15-dien-1-oic acid;(11S,12S,13S)-Epoxy-hydroxyoctadeca-cis-9-cis-15-dien-1-oic acid;6-Methylgingediol;Cedryl acetate;Shyobunyl acetate;Gu…	1.88523e+07	9.26397e+06	6.78686e+06	1.9673e+07	1.31593e+07	7.4798e+06	1.73172e+07	3.17612e+07	1.03036e+07	1.26064e+07	1.85699e+07	5.29362e+06	1.06121e+07	1.94279e+07	1.04105e+07	9.65118e+06	1.34586e+07	6.82087e+06	1.11574e+07	4.07151e+06	6.76042e+06	3.81997e+06	1.53784e+07	9.89055e+06	5.09387e+06	1.31359e+07	1.4792e+07	6.93392e+06	1.18744e+07	1.43648e+07	9.38394e+06	1.5308	up	0.0344764	0.187097	1.07266	yes
POS	POS_247.042_0.8487	247.042	0.8487	phenazine-1-carboxylic acid	96.74	C13H8N2O2	Organoheterocyclic compounds	Diazanaphthalenes	NA	NA	NA	2-Aminopropane-1,3-dithiol;(+)-Epibatidine	7.4746e+06	2.03999e+06	6.09989e+06	4.07431e+06	4.564e+06	9.47031e+06	4.99726e+06	3.91097e+06	2.16999e+06	1.78275e+07	1.31058e+07	3.58683e+06	4.43907e+06	2.69335e+06	1.4021e+07	1.83518e+07	7.90971e+06	1.41931e+07	5.05561e+06	5.10351e+06	1.1858e+07	7.32656e+06	1.24996e+07	1.16609e+07	9.41494e+06	1.70542e+07	5.71451e+06	1.15031e+07	8.5043e+06	6.17528e+06	1.08333e+07	0.57	down	0.00293926	0.0340238	1.67772	yes
NEG	NEG_221.154_6.8802	221.154	6.8802	tetradeca-6,9,12-trienoic acid	80.34	C14H22O2	Lipids and lipid-like molecules	Fatty Acyls	NA	NA	NA	Rishitin;Kobusone;Isokobusone;(10betaH,11xi)-11-Hydroxy-13-nor-6-eremophilen-8-one;Acetaldehyde butyl phenethyl acetal;2,6-Di-tert-butyl-1,4-benzenediol;Benzene, p-di-tert-butoxy-;2,5-Di-tert-butylhydroquinone;Polygonal;Risbitin;Sodium dodecanoate;Betazole;(6E,8E)-4,6,8-Megastigmatriene;1-Phenylheptane;1-Methyl-2-n-hexylbenzene;1,3-Diisopropylbenzene;Pregeijerene;Hexylbenzene	3.04425e+06	2.65295e+06	2.80813e+06	4.72013e+06	1.49629e+06	6.2283e+06	2.65568e+06	6.14223e+06	7.68067e+06	3.97121e+06	2.44202e+06	1.07571e+07	1.43669e+06	872191	1.43913e+07	5.74747e+06	1.36662e+07	4.95201e+06	4.19322e+06	5.42066e+06	5.37828e+06	5.19301e+06	7.21062e+06	9.11557e+06	9.35444e+06	5.43333e+06	1.11367e+07	3.56643e+06	5.77382e+06	4.06485e+06	7.4828e+06	0.5432	down	0.00309745	0.035152	1.77142	yes
NEG	NEG_225.185_7.652	225.185	7.652	xi-Tetrahydro-3-nonyl-2H-pyran-2-one	87.82	C14H26O2	Organoheterocyclic compounds	Lactones	HMDB0037633	NA	NA	5-Tetradecenoic acid;Myristoleic acid;Tsuzuic acid;trans-Tetra-dec-2-enoic acid;(R)-14-Methyloxacyclotetradecan-2-one;Ethyl (E)-2-dodecenoate;12-Methyl-13-tridecanolide;Acetaldehyde di-cis-3-hexenyl acetal;2-Hexenyl octanoate;Houttuynin;Rhodinyl butyrate;Rhodinyl isobutyrate;Citronellyl butyrate;Citronellyl isobutyrate;Butyl 2-decenoate;xi-Tetrahydro-3-nonyl-2H-pyran-2-one;delta-Tetradecalactone;…	7.7397e+07	1.84629e+07	7.24909e+07	2.03136e+07	3.59527e+07	8.49991e+07	2.28769e+07	3.256e+07	9.35153e+07	2.71714e+07	1.75009e+07	8.98879e+07	2.2658e+07	2.10172e+07	1.93191e+08	9.81842e+07	1.59094e+08	6.2993e+07	1.11857e+08	7.64693e+07	6.69189e+07	8.71652e+07	9.11308e+07	8.57179e+07	2.36792e+08	8.00229e+07	3.31906e+08	1.38482e+08	8.77403e+07	4.5486e+07	1.29995e+08	0.3499	down	3.16514e-05	0.00129644	2.37142	yes
NEG	NEG_183.139_6.6172	183.139	6.6172	xi-gamma-Undecalactone	97	C11H20O2	Organoheterocyclic compounds	Lactones	HMDB0038311	NA	NA	NA	1.43408e+07	1.70326e+07	1.54461e+07	1.77939e+07	7.89731e+06	2.7343e+07	2.30408e+07	9.653e+06	2.78465e+07	1.55258e+07	1.16573e+07	3.01342e+07	8.39995e+06	5.24865e+06	3.30973e+07	6.50119e+07	2.54643e+07	1.37892e+07	2.49778e+07	1.27575e+07	1.94251e+07	3.05972e+07	4.12839e+07	1.75807e+07	1.20766e+07	2.54811e+07	1.8831e+07	2.44018e+07	2.12905e+07	1.65257e+07	2.60554e+07	0.6343	down	0.0197765	0.131389	1.23426	yes
NEG	NEG_1000.64_7.1199	1000.64	7.1199	NA	NA	NA	NA	NA	NA	NA	NA	PC(DiMe(13,5)/PGF1alpha);PC(PGF1alpha/DiMe(13,5))	3.66487e+06	631284	406990	1.92985e+06	1.34283e+06	352543	355412	770192	208615	395893	672305	697758	485996	1.11703e+06	311133	178021	293427	188849	213255	258182	309084	95889.2	383331	137375	187176	106551	221899	281255	578464	930826	226102	4.1168	up	5.57515e-05	0.00206731	2.42041	yes
NEG	NEG_1001.56_6.65	1001.56	6.65	NA	NA	NA	NA	NA	NA	NA	NA	PGP(a-25:0/18:2(10E,12Z)+=O(9));PGP(18:2(10E,12Z)+=O(9)/a-25:0);PGP(a-25:0/18:2(9Z,11E)+=O(13));PGP(18:2(9Z,11E)+=O(13)/a-25:0);PGP(a-25:0/18:3(10,12,15)-OH(9));PGP(18:3(10,12,15)-OH(9)/a-25:0);PGP(a-25:0/18:3(9,11,15)-OH(13));PGP(18:3(9,11,15)-OH(13)/a-25:0);PI(22:3(10Z,13Z,16Z)/20:3(5Z,8Z,11Z)-O(14R,15S));PI(20:3(5Z,8Z,11Z)-O(14R,15S)/22:3(10Z,13Z,16Z));PI(22:3(10Z,13Z,16Z)/20:3(5Z,8Z,14Z)-O(11…	738095	231577	186078	489081	728212	191914	229560	401598	136768	192222	174081	313588	246212	268742	137162	81388.4	171342	112587	107498	149665	101212	40059.1	46751.4	52809.7	48080	40638.7	100823	268657	213800	323409	104191	3.104	up	1.06542e-05	0.000608706	2.45072	yes
NEG	NEG_1004.58_5.1368	1004.58	5.1368	NA	NA	NA	NA	NA	NA	NA	NA	NA	184577	122469	49157.8	617771	13460.9	84155.1	37354.4	121885	17391.2	33449.9	71062.5	44966.4	290927	60698.2	33491.7	32811.5	5391.32	49304.2	122164	13402.8	3794.87	3405.89	22707.3	26208.8	28487.8	25216.2	2624.28	33093.9	76836.8	124952	28721.8	4.3504	up	0.0018547	0.024397	2.39496	yes
NEG	NEG_1008.76_8.135	1008.76	8.135	NA	NA	NA	NA	NA	NA	NA	NA	NA	184848	735673	1.13081e+06	782989	2.61234e+06	2.86564e+06	590772	1.26029e+06	2.18463e+06	886263	1.04735e+06	1.78781e+06	862555	903972	2.75411e+06	1.7629e+06	2.64973e+06	1.63323e+06	1.79691e+06	1.91306e+06	1.66017e+06	1.62165e+06	1.39508e+06	2.49034e+06	2.00742e+06	2.39478e+06	4.02577e+06	1.46753e+06	1.69316e+06	1.274e+06	2.11233e+06	0.6031	down	0.00457502	0.0465973	1.6308	yes
NEG	NEG_1009.76_8.1315	1009.76	8.1315	NA	NA	NA	NA	NA	NA	NA	NA	TG(20:4(5Z,8Z,11Z,14Z)/20:4(5Z,8Z,11Z,14Z)/20:4(5Z,8Z,11Z,14Z));TG(18:3(9Z,12Z,15Z)/20:4(5Z,8Z,11Z,14Z)/22:5(7Z,10Z,13Z,16Z,19Z));TG(20:4(5Z,8Z,11Z,14Z)/18:2(9Z,12Z)/22:6(4Z,7Z,10Z,13Z,16Z,19Z));TG(20:5(5Z,8Z,11Z,14Z,17Z)/18:1(9Z)/22:6(4Z,7Z,10Z,13Z,16Z,19Z));TG(20:5(5Z,8Z,11Z,14Z,17Z)/18:2(9Z,12Z)/22:5(7Z,10Z,13Z,16Z,19Z));TG(16:0/22:6(4Z,7Z,10Z,13Z,16Z,19Z)/22:6(4Z,7Z,10Z,13Z,16Z,19Z));TG(16:1(…	808919	376108	802030	621734	1.52686e+06	2.10675e+06	443529	760278	1.76017e+06	674227	898920	991126	512785	612452	1.77941e+06	1.20742e+06	1.51837e+06	1.1333e+06	1.20993e+06	1.04549e+06	1.10959e+06	958830	895904	1.62404e+06	1.4246e+06	1.18525e+06	2.83473e+06	742577	1.12733e+06	921136	1.33353e+06	0.6907	down	0.0123031	0.0947248	1.2418	yes
NEG	NEG_1010.78_8.2795	1010.78	8.2795	NA	NA	NA	NA	NA	NA	NA	NA	NA	1.55659e+06	466018	3.04296e+06	955939	1.28004e+06	7.13044e+06	679373	1.42677e+06	8.7079e+06	513018	530135	7.10111e+06	907025	440301	8.95981e+06	4.15103e+06	1.33395e+07	4.62824e+06	5.2072e+06	4.15667e+06	4.77347e+06	4.05539e+06	2.53164e+06	7.50573e+06	8.8335e+06	5.1476e+06	1.10463e+07	4.07375e+06	4.39812e+06	2.48126e+06	6.31499e+06	0.3929	down	0.000279632	0.00680523	2.60026	yes
NEG	NEG_1011.78_8.2805	1011.78	8.2805	NA	NA	NA	NA	NA	NA	NA	NA	NA	1.96157e+06	95207.9	1.52819e+06	460024	1.34805e+06	3.57959e+06	322331	793356	5.48249e+06	267444	106005	4.24935e+06	437141	508599	5.29974e+06	2.99096e+06	8.33051e+06	2.95204e+06	2.85294e+06	2.94054e+06	3.35487e+06	2.66354e+06	2.24651e+06	4.1415e+06	5.20485e+06	2.78572e+06	6.47731e+06	3.10179e+06	2.73151e+06	1.50995e+06	3.95306e+06	0.382	down	0.000554325	0.010679	2.68885	yes
NEG	NEG_1012.79_8.2724	1012.79	8.2724	NA	NA	NA	NA	NA	NA	NA	NA	PC(24:1(15Z)/24:1(15Z))	49484.8	870035	1.44179e+06	1.24255e+06	37428.8	2.83809e+06	567406	796371	2.33081e+06	894621	707453	3.1774e+06	188347	1.18051e+06	4.48403e+06	1.79364e+06	4.12759e+06	4.11303e+06	3.22333e+06	3.04733e+06	2.58873e+06	2.35472e+06	2.07242e+06	4.10112e+06	5.42017e+06	2.43324e+06	5.84386e+06	3.17195e+06	2.32491e+06	1.16588e+06	3.48394e+06	0.3346	down	0.000796505	0.0136462	2.68506	yes
NEG	NEG_1013.79_8.1329	1013.79	8.1329	NA	NA	NA	NA	NA	NA	NA	NA	TG(20:4(5Z,8Z,11Z,14Z)/18:1(9Z)/22:5(7Z,10Z,13Z,16Z,19Z));TG(22:5(7Z,10Z,13Z,16Z,19Z)/16:0/22:5(7Z,10Z,13Z,16Z,19Z));TG(16:0/22:4(7Z,10Z,13Z,16Z)/22:6(4Z,7Z,10Z,13Z,16Z,19Z));TG(16:0/22:5(4Z,7Z,10Z,13Z,16Z)/22:5(4Z,7Z,10Z,13Z,16Z));TG(16:0/22:5(4Z,7Z,10Z,13Z,16Z)/22:5(7Z,10Z,13Z,16Z,19Z));TG(16:0/22:5(7Z,10Z,13Z,16Z,19Z)/22:5(4Z,7Z,10Z,13Z,16Z));TG(16:0/22:5(7Z,10Z,13Z,16Z,19Z)/22:5(7Z,10Z,13Z,16…	744329	348350	821501	594685	736765	1.77495e+06	372438	693508	73766.1	411291	382324	979949	351375	383548	1.6139e+06	855662	1.52705e+06	2.49678e+06	981634	1.49968e+06	1.23467e+06	2.36131e+06	1.08999e+06	1.77383e+06	2.9128e+06	1.37333e+06	4.24665e+06	850609	1.19595e+06	619199	1.77271e+06	0.3493	down	5.98105e-05	0.00215614	2.37987	yes
NEG	NEG_1014.74_6.2349	1014.74	6.2349	NA	NA	NA	NA	NA	NA	NA	NA	PS(24:1(15Z)/24:1(15Z))	698500	321364	452001	196575	1.2789e+06	198857	123267	176794	934143	217842	134845	138941	598237	322088	161880	194930	313647	151259	149718	158037	229514	172756	64515.5	126263	277265	211379	263369	76297.2	297971	413739	182202	2.2708	up	0.0155241	0.111345	1.41574	yes
NEG	NEG_1015.81_8.9351	1015.81	8.9351	NA	NA	NA	NA	NA	NA	NA	NA	DG(14:1(9Z)/14:1(9Z)/0:0);DG(14:1n5/0:0/14:1n5);Sorbitan trioleate;Glycomul TO;[(3S,4R,5R)-5-[(1R)-2-Hydroxy-1-octadec-9-enoyloxyethyl]-4-octadec-9-enoyloxyoxolan-3-yl] octadec-9-enoate	1.21328e+06	3.25654e+06	3.36989e+06	3.19366e+06	234347	3.00167e+06	2.73065e+06	2.64276e+06	1.3682e+06	2.50107e+06	3.01019e+06	2.40899e+06	1.89991e+06	3.29532e+06	4.72133e+06	2.34766e+06	1.76094e+06	4.72248e+06	3.93777e+06	4.62692e+06	7.07348e+06	2.13438e+06	2.59831e+06	5.16475e+06	5.77762e+06	1.90462e+06	3.90603e+06	5.0259e+06	3.20817e+06	2.43761e+06	3.97873e+06	0.6127	down	0.0226808	0.143093	1.29727	yes
NEG	NEG_1019.61_6.6817	1019.61	6.6817	NA	NA	NA	NA	NA	NA	NA	NA	Dodecyl-beta-D-maltoside;PI(22:3(10Z,13Z,16Z)/18:1(12Z)-2OH(9,10));PI(18:1(12Z)-2OH(9,10)/22:3(10Z,13Z,16Z))	4.03774e+06	3.22961e+06	2.47349e+06	4.43256e+06	4.25072e+06	2.70827e+06	2.9227e+06	3.39086e+06	2.40346e+06	2.35551e+06	3.14889e+06	3.08782e+06	2.34425e+06	3.12444e+06	2.64395e+06	1.75216e+06	2.72446e+06	1.79536e+06	1.82537e+06	2.12011e+06	1.64167e+06	1.18151e+06	1.70036e+06	1.3179e+06	1.40589e+06	1.31595e+06	1.78949e+06	2.64487e+06	2.49176e+06	3.13645e+06	1.84707e+06	1.6981	up	3.88402e-06	0.000292114	1.71165	yes
NEG	NEG_1020.61_6.6816	1020.61	6.6816	NA	NA	NA	NA	NA	NA	NA	NA	NA	2.2265e+06	1.67634e+06	1.36106e+06	2.57798e+06	2.45915e+06	1.51762e+06	1.66343e+06	1.89561e+06	1.32003e+06	1.58973e+06	1.62666e+06	1.57198e+06	1.35824e+06	1.83024e+06	1.34782e+06	992934	1.6014e+06	1.00094e+06	1.05522e+06	1.161e+06	823344	570357	857548	713047	827963	689648	901879	1.40213e+06	1.37928e+06	1.76247e+06	996088	1.7694	up	2.68597e-06	0.000230681	1.79519	yes
NEG	NEG_1021.61_6.677	1021.61	6.677	NA	NA	NA	NA	NA	NA	NA	NA	PE(24:0/LTE4);PE(LTE4/24:0)	534279	493721	456989	564045	593609	334180	402242	563165	234527	252115	385583	372346	382426	503384	392884	171460	425224	256347	281240	261173	99738.8	71335.2	133977	98258	237530	134909	213564	261876	325433	433758	217108	1.9979	up	0.000114119	0.00354941	1.96209	yes
NEG	NEG_1028.82_9.4536	1028.82	9.4536	NA	NA	NA	NA	NA	NA	NA	NA	NA	76050.4	56513.8	95308.1	124120	64405.3	371503	34497.5	202525	77575.5	75044.5	52895.6	389754	90282.5	96985.9	352140	287116	239071	496480	349874	252842	294674	222993	179598	415360	569088	299303	674968	162071	235823	129104	342541	0.3769	down	2.87669e-05	0.00120683	2.42892	yes
NEG	NEG_1034.78_8.2804	1034.78	8.2804	NA	NA	NA	NA	NA	NA	NA	NA	NA	51572.2	584286	816242	449810	1.7203e+06	2.76889e+06	47941.2	660355	2.65298e+06	101168	537625	2.74302e+06	97197.6	232049	3.59271e+06	1.5843e+06	4.80278e+06	1.89492e+06	1.74752e+06	1.95762e+06	1.41983e+06	2.02477e+06	909378	2.49631e+06	2.7033e+06	2.44306e+06	4.37692e+06	1.35236e+06	1.67033e+06	961675	2.37898e+06	0.4042	down	0.00141809	0.0204525	2.6179	yes
NEG	NEG_1035.78_8.0156	1035.78	8.0156	NA	NA	NA	NA	NA	NA	NA	NA	Ganoderiol C	1.67281e+06	1.00191e+06	1.8744e+06	1.88909e+06	1.44467e+06	4.76896e+06	870312	3.10038e+06	3.4646e+06	1.17332e+06	711772	5.33708e+06	417376	713952	6.64233e+06	2.93915e+06	5.88268e+06	2.57511e+06	2.63702e+06	2.2477e+06	3.07932e+06	1.87993e+06	3.54981e+06	6.03486e+06	4.85597e+06	4.40146e+06	8.15518e+06	1.26979e+06	3.02111e+06	2.03147e+06	4.01074e+06	0.5065	down	0.00311989	0.0353163	1.87142	yes
NEG	NEG_1035.78_8.2809	1035.78	8.2809	NA	NA	NA	NA	NA	NA	NA	NA	Ganoderiol C	729081	21839	367394	194110	1.0022e+06	1.45453e+06	459013	117285	1.70131e+06	29573.2	334899	1.1853e+06	57665.3	103568	2.4863e+06	996541	3.03049e+06	1.07319e+06	1.30598e+06	1.3789e+06	1.11101e+06	1.21169e+06	839321	1.56001e+06	1.93115e+06	1.20683e+06	2.93086e+06	746573	1.05595e+06	554126	1.55778e+06	0.3557	down	0.000844634	0.0141431	2.71994	yes
NEG	NEG_1038.81_8.454	1038.81	8.454	NA	NA	NA	NA	NA	NA	NA	NA	NA	333572	2.48057e+06	5.22743e+06	4.13573e+06	615520	8.62666e+06	3.1791e+06	5.92536e+06	5.42266e+06	3.69758e+06	1.73385e+06	6.72591e+06	1.69508e+06	1.32874e+06	7.22891e+06	4.73433e+06	5.88434e+06	6.04849e+06	6.6131e+06	4.6396e+06	8.61359e+06	5.99059e+06	4.82371e+06	9.23227e+06	1.10565e+07	6.00286e+06	7.4179e+06	5.29112e+06	5.16804e+06	3.65198e+06	6.68409e+06	0.5464	down	0.00406344	0.0427948	1.9616	yes
NEG	NEG_1039.81_8.45	1039.81	8.45	NA	NA	NA	NA	NA	NA	NA	NA	NA	164901	907299	5.3711e+06	1.53931e+06	99677	2.41094e+06	1.07454e+06	3.57035e+06	1.0429e+06	1.60074e+06	537421	3.16306e+06	219199	455529	3.8456e+06	1.80577e+06	1.23194e+06	4.20462e+06	3.79193e+06	2.88583e+06	4.65798e+06	4.13062e+06	2.77169e+06	4.08006e+06	6.42044e+06	2.77494e+06	5.07161e+06	2.72097e+06	2.59111e+06	1.58264e+06	3.59957e+06	0.4397	down	0.0016319	0.0223267	2.36244	yes
NEG	NEG_1041.83_8.9349	1041.83	8.9349	NA	NA	NA	NA	NA	NA	NA	NA	NA	2.82781e+06	2.45172e+06	2.22188e+06	3.4821e+06	2.32874e+06	3.15093e+06	1.81689e+06	2.19844e+06	548567	2.63384e+06	2.27889e+06	3.59085e+06	839041	2.85083e+06	2.67516e+06	3.04113e+06	305428	3.13344e+06	4.10739e+06	3.20134e+06	9.51736e+06	5.0481e+06	9.279e+06	5.39805e+06	2.96366e+06	4.06558e+06	8.96001e+06	4.8671e+06	3.56369e+06	2.3729e+06	4.75448e+06	0.4991	down	0.0441846	0.216165	1.28435	yes
NEG	NEG_1043.61_6.6616	1043.61	6.6616	NA	NA	NA	NA	NA	NA	NA	NA	Ganglioside GA2 (d18:1/12:0);PI(22:3(10Z,13Z,16Z)/20:3(8Z,11Z,14Z)-2OH(5,6));PI(20:3(8Z,11Z,14Z)-2OH(5,6)/22:3(10Z,13Z,16Z))	2.25504e+06	1.46823e+06	1.2279e+06	1.84817e+06	2.30768e+06	1.45639e+06	1.52678e+06	2.51589e+06	861213	1.18235e+06	1.13737e+06	2.07412e+06	1.30765e+06	1.4306e+06	1.21827e+06	679480	1.04888e+06	739714	1.39227e+06	1.56042e+06	907500	675281	843951	1.04159e+06	818012	657921	869902	1.58736e+06	1.30857e+06	1.61424e+06	1.0029e+06	1.6096	up	0.0003744	0.00819738	1.48737	yes
NEG	NEG_1044.61_6.6587	1044.61	6.6587	NA	NA	NA	NA	NA	NA	NA	NA	NA	1.20407e+06	762369	728446	945503	1.41502e+06	839510	781433	1.35611e+06	464560	647696	606809	1.28569e+06	723376	723245	551627	321036	540758	467583	721065	991480	507556	233913	453026	526872	428984	367338	560094	978534	719061	891703	546419	1.6319	up	0.0010053	0.0159316	1.51361	yes
NEG	NEG_1049.19_9.5492	1049.19	9.5492	NA	NA	NA	NA	NA	NA	NA	NA	Cefotiam	193723	362844	641583	217108	83796	158742	193267	261412	899039	42683.1	87455.4	436194	1.28352e+06	122347	154705	82306.3	750453	56292.1	160715	87966.6	127748	26551.5	53170.3	200036	152994	81061.9	70943.3	157854	255233	355980	154486	2.3043	up	0.0307771	0.175088	1.69518	yes
NEG	NEG_113.024_0.7422	113.024	0.7422	NA	NA	NA	NA	NA	NA	NA	NA	Norfuraneol;cis-Acetylacrylate;Glutaric anhydride;Ethane-1,1,2-tricarbaldehyde;3-Butyn-1-al;Furan;2-Propyn-1-al;Propynyloxy	4.01454e+07	3.48154e+07	3.20159e+07	3.11394e+07	3.39265e+07	3.16971e+07	3.96537e+07	3.11125e+07	3.07078e+07	3.72063e+07	3.73645e+07	3.07241e+07	3.17764e+07	3.35434e+07	2.5656e+07	2.284e+07	2.17362e+07	2.71824e+07	2.44066e+07	2.33873e+07	2.60508e+07	2.63712e+07	2.45162e+07	2.89015e+07	2.49109e+07	2.10982e+07	2.65776e+07	2.53061e+07	2.9456e+07	3.39877e+07	2.49243e+07	1.3636	up	2.0954e-09	8.39463e-07	1.38279	yes
NEG	NEG_114.028_0.7457	114.028	0.7457	NA	NA	NA	NA	NA	NA	NA	NA	NA	1.68406e+06	1.3479e+06	1.37139e+06	1.03321e+06	1.347e+06	1.15664e+06	1.26092e+06	1.11569e+06	1.34406e+06	1.65273e+06	1.58732e+06	1.34479e+06	1.19355e+06	1.15104e+06	961963	796632	1.06101e+06	937691	890437	896771	955322	1.01795e+06	1.01662e+06	1.33946e+06	1.01099e+06	989211	1.19283e+06	868714	1.16164e+06	1.32788e+06	995400	1.334	up	1.14778e-05	0.000641987	1.22876	yes
NEG	NEG_116.743_6.952	116.743	6.952	NA	NA	NA	NA	NA	NA	NA	NA	NA	1.08403e+06	850195	856164	768764	1.06464e+06	692334	903015	1.10696e+06	661282	764024	618086	1.04214e+06	893684	772303	1.10606e+06	1.06956e+06	986707	1.13035e+06	1.18235e+06	1.09567e+06	1.23234e+06	984329	1.11046e+06	984956	1.1112e+06	956830	928193	1.17267e+06	968903	862688	1.07512e+06	0.8024	down	0.000534229	0.0104181	1.03038	yes
NEG	NEG_125.024_0.7492	125.024	0.7492	NA	NA	NA	NA	NA	NA	NA	NA	1,2,3-Trihydroxybenzene;1,3,5-Trihydroxybenzene;Methyl 2-furoate;Maltol;4-Hydroxy-2H-pyran-3-carboxaldehyde;(Z)-Tamarindienal;5-Methylfuran-2-carboxylic acid;2,3-Dimethylmaleic anhydride;3-(Hydroxymethyl)furan-2-carbaldehyde;Isomaltol;Carbohydrazide;Tricyclo[1.1.0.02,4]butane-1-carbaldehyde	1.8262e+06	1.53494e+06	1.44956e+06	1.07584e+06	1.5052e+06	1.3011e+06	1.82588e+06	1.17683e+06	1.22882e+06	1.60737e+06	1.62759e+06	1.04707e+06	1.40625e+06	1.49195e+06	906267	699637	817241	1.24559e+06	944452	869652	991423	1.12723e+06	990738	1.24441e+06	986211	901550	994859	957947	1.20649e+06	1.43604e+06	976943	1.4699	up	2.07777e-06	0.000185633	1.43534	yes
NEG	NEG_129.019_0.7474	129.019	0.7474	NA	NA	NA	NA	NA	NA	NA	NA	Glutaconic acid;Citraconic acid;Mesaconic acid;Itaconic acid;Gamma-delta-Dioxovaleric acid;Methyl hydrogen fumarate;2-Hydroxyglutaric acid lactone;2,5-Dioxopentanoate;(Z)-4-Methoxy-4-oxobut-2-enoic acid;2-Methylbut-2-enedioic acid;Pentenedioic acid;4-Hydroxy-2-butenoic acid gamma-lactone;Furanone A;1,4-Dioxin;3-Hydroxycyclobut-2-en-1-one;But-2-enedial;Diketene;Propynoic acid	5.8362e+06	4.4175e+06	3.96934e+06	3.78454e+06	5.30308e+06	4.38069e+06	4.09518e+06	3.38428e+06	4.62593e+06	4.86327e+06	4.41654e+06	3.37286e+06	4.06741e+06	3.40552e+06	2.93044e+06	2.27105e+06	2.90354e+06	2.94228e+06	2.46395e+06	2.37966e+06	3.95391e+06	2.93885e+06	2.77946e+06	2.79804e+06	3.30044e+06	2.44677e+06	2.85827e+06	2.59148e+06	3.55287e+06	4.28017e+06	2.82558e+06	1.5148	up	1.87933e-07	2.57914e-05	1.53956	yes
NEG	NEG_134.894_6.2279	134.894	6.2279	NA	NA	NA	NA	NA	NA	NA	NA	NA	1.9455e+06	1.38316e+06	1.35075e+06	1.22809e+06	2.02977e+06	1.59968e+06	2.05136e+06	1.17209e+06	1.85456e+06	1.26766e+06	1.18122e+06	2.05871e+06	1.79542e+06	2.51836e+06	1.22286e+06	1.17365e+06	1.31662e+06	1.22039e+06	1.15757e+06	1.11968e+06	1.40435e+06	1.08308e+06	1.18747e+06	1.153e+06	1.50556e+06	1.17429e+06	1.12714e+06	1.09771e+06	1.44213e+06	1.67402e+06	1.21024e+06	1.3832	up	0.000665743	0.0120741	1.16762	yes
NEG	NEG_134.894_6.9797	134.894	6.9797	NA	NA	NA	NA	NA	NA	NA	NA	NA	2.89823e+06	4.04372e+06	3.17914e+06	4.81278e+06	2.95965e+06	1.12242e+07	2.71652e+06	6.43749e+06	4.06192e+06	5.44546e+06	3.61171e+06	3.33926e+06	4.49619e+06	8.8998e+06	2.56148e+06	2.17443e+06	3.77609e+06	2.53215e+06	3.6638e+06	2.47584e+06	2.96466e+06	2.70097e+06	2.48254e+06	3.16208e+06	3.18897e+06	2.63119e+06	8.66384e+06	2.28216e+06	4.04951e+06	4.86615e+06	3.23287e+06	1.5052	up	0.0146066	0.106544	1.18201	yes
NEG	NEG_138.839_6.952	138.839	6.952	NA	NA	NA	NA	NA	NA	NA	NA	NA	1.00791e+06	826851	804706	727522	1.01896e+06	668192	955899	1.01241e+06	631411	715288	632658	890736	831831	834600	998973	1.00072e+06	979476	981231	1.17459e+06	1.13863e+06	1.06523e+06	930396	1.12333e+06	1.01226e+06	975949	919003	893221	1.042e+06	921214	825642	1.01679e+06	0.812	down	0.00036787	0.00808101	1.01996	yes
NEG	NEG_143.035_0.75	143.035	0.75	NA	NA	NA	NA	NA	NA	NA	NA	3-Hexenedioic acid;3-Methylglutaconic acid;(E)-2-Methylglutaconic acid;trans-2-Hexenedioic acid;3-Hydroxyadipic acid 3,6-lactone;Dimethyl fumarate;Maleic acid homopolymer;Ethyl hydrogen fumarate;Dimethyl maleate;2-Ethylbut-2-enedioic acid;2,3-Dimethylbut-2-enedioic acid;3,6-Dimethyl-1,4-dioxane-2,5-dione;4-Ethoxy-4-oxobut-2-enoic acid;2-Oxopropyl 2-oxopropanoate;1,1-Cyclobutanedicarboxylic acid;D…	1.52158e+07	1.32375e+07	1.0235e+07	1.22532e+07	1.17281e+07	1.28376e+07	1.43555e+07	1.15396e+07	1.20621e+07	1.56907e+07	1.37838e+07	1.16058e+07	1.16083e+07	1.22449e+07	8.80292e+06	7.44609e+06	6.04002e+06	8.40102e+06	9.94833e+06	7.74121e+06	9.04226e+06	8.59871e+06	7.6072e+06	1.17098e+07	7.95499e+06	6.75757e+06	9.25843e+06	8.4343e+06	1.05765e+07	1.27427e+07	8.4102e+06	1.5152	up	5.08138e-08	8.56245e-06	1.59732	yes
NEG	NEG_145.596_7.7303	145.596	7.7303	NA	NA	NA	NA	NA	NA	NA	NA	NA	1.22834e+06	810675	649760	731250	1.27111e+06	768160	800928	959051	565128	706159	379372	584066	1.09236e+06	949369	1.04697e+06	993341	1.11237e+06	1.02529e+06	1.0615e+06	1.10553e+06	1.12586e+06	1.00464e+06	1.18541e+06	1.01496e+06	958534	928055	834306	1.01052e+06	925108	821123	1.02909e+06	0.7979	down	0.00954422	0.0790129	1.07939	yes
NEG	NEG_146.025_4.1558	146.025	4.1558	NA	NA	NA	NA	NA	NA	NA	NA	Indole-5,6-quinone;Agrocybin;1H-Indole-2,3-dione;Phthalimide;1,3,5-Triazine-2,4-diamine	796552	1.76286e+06	1.69835e+06	1.39969e+06	1.21179e+06	444459	1.53644e+06	3.5084e+06	2.5004e+06	1.34932e+06	1.57933e+06	1.52251e+06	1.8133e+06	759491	1.34186e+06	1.70322e+06	2.06011e+06	1.74964e+06	3.5539e+06	1.34718e+06	5.61526e+06	1.32554e+06	3.00936e+06	3.21629e+06	1.78068e+06	1.7075e+06	2.17829e+06	2.09985e+06	1.94898e+06	1.56306e+06	2.33491e+06	0.6694	down	0.0252631	0.153361	1.12926	yes
NEG	NEG_146.028_1.2941	146.028	1.2941	NA	NA	NA	NA	NA	NA	NA	NA	Thiomorpholine 3-carboxylate;2-Methylthiazolidine-4-carboxylic acid;4,5-Dihydro-2-methylthiazole;2-Iminothiolane;Dihydrothiazine;Isopropyl isothiocyanate;4-methyl-3-thiazoline;thiazoline;Ethyl isothiocyanate	903109	1.23795e+06	967846	1.46878e+06	1.65974e+06	967560	940007	794202	836204	1.95357e+06	717516	651331	691113	569933	306943	466781	525860	1.01594e+06	723373	395604	357985	341837	322456	507056	869317	512519	286520	388152	763543	1.02563e+06	501453	2.0453	up	2.69935e-05	0.0011629	1.93494	yes
NEG	NEG_146.983_0.8215	146.983	0.8215	NA	NA	NA	NA	NA	NA	NA	NA	Sodium lactate	4.66068e+07	2.1227e+07	2.77996e+07	3.57434e+07	1.73397e+07	3.57898e+07	2.61775e+07	3.96079e+07	3.53431e+07	1.76197e+07	3.07151e+07	2.67452e+07	3.05447e+07	2.18671e+07	5.54299e+07	5.93057e+07	4.82351e+07	5.95381e+07	4.78705e+07	4.51864e+07	5.55246e+07	4.90589e+07	5.84695e+07	5.06067e+07	5.54406e+07	5.97426e+07	3.59426e+07	5.16891e+07	4.08988e+07	2.95091e+07	5.22886e+07	0.5643	down	1.79056e-06	0.000166685	1.86402	yes
NEG	NEG_147.986_0.8143	147.986	0.8143	NA	NA	NA	NA	NA	NA	NA	NA	NA	1.23096e+06	357531	575070	833299	131002	715711	1.22783e+06	1.09095e+06	583335	159248	580596	812776	708173	468069	1.56417e+06	1.6933e+06	1.30689e+06	1.32393e+06	1.39292e+06	1.23476e+06	1.60139e+06	1.19118e+06	1.36555e+06	1.26048e+06	1.62675e+06	1.7607e+06	864786	1.24372e+06	1.03232e+06	676754	1.38789e+06	0.4876	down	0.000325327	0.00751207	2.03867	yes
NEG	NEG_148.98_0.8233	148.98	0.8233	NA	NA	NA	NA	NA	NA	NA	NA	NA	1.43848e+07	6.52198e+06	9.1236e+06	1.14835e+07	4.85219e+06	1.11323e+07	1.528e+07	1.29841e+07	1.15536e+07	4.69516e+06	9.43197e+06	8.16415e+06	9.3984e+06	6.89627e+06	1.7943e+07	2.0113e+07	1.60245e+07	1.85258e+07	1.502e+07	1.42358e+07	1.75071e+07	1.55964e+07	1.94034e+07	1.67187e+07	1.79389e+07	1.85399e+07	1.1773e+07	1.71999e+07	1.33015e+07	9.70729e+06	1.68957e+07	0.5745	down	2.78421e-05	0.00118413	1.78999	yes
NEG	NEG_149.133_6.4037	149.133	6.4037	NA	NA	NA	NA	NA	NA	NA	NA	Cystophorene;(E)-4,8-Dimethyl-1,3,7-nonatriene;4-Methyl-2-methylene-1-(1methylethylidene)-cyclohexane	10636.8	101899	122005	121522	50579.3	400299	269601	305901	226542	187555	185033	428353	76068.9	15903.3	390334	240541	597041	284166	172240	130832	251889	249832	285162	481474	219664	244936	434975	223055	239573	178707	300439	0.5948	down	0.0165901	0.116603	1.90544	yes
NEG	NEG_151.149_6.5715	151.149	6.5715	NA	NA	NA	NA	NA	NA	NA	NA	1,4-Undecadiene;(Z)-1,5-Undecadiene	316557	132949	229424	40882.7	144251	671479	132019	31713.1	510822	173618	32245.3	781373	11988	178723	735479	265578	516465	427176	445874	455397	364045	462237	361976	856782	663409	398733	688209	463163	374735	242003	507466	0.4769	down	0.00220876	0.0276085	2.29313	yes
NEG	NEG_153.017_0.7454	153.017	0.7454	NA	NA	NA	NA	NA	NA	NA	NA	1,1,1-Trifluoro-2,4-pentanedione;Biurea	2.48592e+06	2.60834e+06	2.74301e+06	2.22837e+06	3.03941e+06	2.3597e+06	2.79911e+06	2.31813e+06	2.31777e+06	2.64047e+06	2.50506e+06	2.39313e+06	2.53389e+06	2.59318e+06	1.77183e+06	1.56634e+06	1.44926e+06	1.70985e+06	1.71432e+06	1.68277e+06	2.35903e+06	1.88193e+06	1.9669e+06	1.7908e+06	1.7581e+06	1.39057e+06	1.94951e+06	1.54143e+06	2.14636e+06	2.54039e+06	1.75233e+06	1.4497	up	1.22446e-08	2.96364e-06	1.5263	yes
NEG	NEG_153.092_5.447	153.092	5.447	NA	NA	NA	NA	NA	NA	NA	NA	Methyl 2-octynoate;2,4-Hexadienyl propionate;2-Nonenoic acid gamma-lactone;(E)-2,6-Dimethyl-2,5-heptadienoic acid;3,5,5-Trimethyl-1,2-cyclohexanedione;Octahydro-2H-1-benzopyran-2-one;Allyl hexenoate;xi-2,2,6-Trimethyl-1,4-cyclohexanedione;Anapear;4-Oxo-2-nonenal;2-Nonenal, 4-oxo-;(Z)-1,3-Octadiene;Vinylcyclohexene;4-Vinylcyclohexene;Cyclooctyne;trans-Allo-ocimene;(3E,5E)-1,3,5-octatriene;1-Methyl…	93131	82545.6	74118.9	186318	12455.4	19502.9	151915	261015	62711	140556	88537	43069.6	63390	37199.4	51471.1	28844.4	42337.1	29588.1	54513.2	58241.4	36758	45236.6	41481.6	37095.6	10159.6	29216.6	42403.4	46625.1	66801.3	94033.2	39569.4	2.3764	up	0.0183727	0.124912	1.44781	yes
NEG	NEG_156.012_4.5151	156.012	4.5151	NA	NA	NA	NA	NA	NA	NA	NA	2-(Methylsulfonyl)pyridine;Benzenesulfonamide;2-Mercaptopyridine;4-Mercaptopyridine	17676.1	14746.3	10166.1	50837.3	93832.3	3422.48	82585.1	43755.9	14316.9	14858.5	5334.41	27118.7	20981.4	11863.8	50738.7	13497.8	19615.3	21123.3	12355.2	75255	112317	42695.1	79938.8	377611	19438.7	315387	279544	18114.8	66040.3	29392.5	102688	0.2862	down	0.0239029	0.14862	1.73676	yes
NEG	NEG_160.025_0.6456	160.025	0.6456	NA	NA	NA	NA	NA	NA	NA	NA	A-Ketoglutaric acid oxime;Erucin;1-Thiocyanato-4-(methylthio)butane;N-Formyl-L-aspartate;Alanine glyoxylate;Glycine pyruvate;N-Oxalyl-L-alanine;serine-glyoxylate;4-Oxo-2-azetidinecarboxylic acid;MALEAMIC ACID;N-Hydroxysuccinimide;1-Hydroxypyrrole-2,5-diol;2,4-Oxazolidinedione;hydroxyoxazolone	1.84619e+06	1.27353e+06	895365	1.17866e+06	1.34179e+06	1.66288e+06	1.12864e+06	846484	1.28799e+06	1.09119e+06	1.56244e+06	1.13309e+06	3.6629e+06	3.27562e+06	1.91777e+06	4.58879e+06	2.91722e+06	2.39972e+06	2.3716e+06	2.43812e+06	2.40738e+06	1.6712e+06	4.51303e+06	2.28246e+06	3.30755e+06	2.69135e+06	3.37977e+06	2.21111e+06	2.18871e+06	1.58477e+06	2.79265e+06	0.5675	down	0.000169644	0.00473438	1.83297	yes
NEG	NEG_161.913_9.0519	161.913	9.0519	NA	NA	NA	NA	NA	NA	NA	NA	NA	4.55385e+06	2.30379e+06	1.94796e+06	2.19331e+06	5.43092e+06	3.31623e+06	1.7899e+06	1.96107e+06	3.15389e+06	2.60139e+06	2.18967e+06	3.16604e+06	4.43763e+06	1.15117e+06	6.87843e+06	3.63963e+06	3.81729e+06	4.13588e+06	5.35238e+06	2.95631e+06	6.2178e+06	2.43393e+06	5.51055e+06	3.29154e+06	7.81063e+06	5.6689e+06	8.2841e+06	1.94898e+06	3.86226e+06	2.8712e+06	4.85331e+06	0.5916	down	0.003569	0.039039	1.39816	yes
NEG	NEG_169.011_0.7738	169.011	0.7738	NA	NA	NA	NA	NA	NA	NA	NA	Diethylthiophosphate;Ethyl 2-mercaptopropionate;Methyl 3-mercaptobutanoate;Methyl 3-(methylthio)propanoate;Ethyl 2-(methylthio)acetate;Ethyl 3-mercaptopropanoic acid;2-Hydroxy-4-methylthiobutyric acid;Dimethylpropiothetin;Ethyl 2-propene sulfinate;2-Chloroethyl ethyl sulfide	6.368e+06	2.19678e+06	3.50481e+06	3.05961e+06	602275	2.34016e+06	2.48744e+06	2.83805e+06	681458	2.14478e+06	3.96234e+06	1.12536e+06	2.92531e+06	3.0612e+06	8.87403e+06	8.72423e+06	6.23556e+06	4.19541e+06	5.60823e+06	4.56883e+06	6.27633e+06	7.50826e+06	6.86898e+06	8.19492e+06	8.31735e+06	5.6446e+06	6.14526e+06	8.36362e+06	4.74369e+06	2.66411e+06	6.82326e+06	0.3904	down	2.39593e-05	0.00108749	2.52986	yes
NEG	NEG_169.123_4.9677	169.123	4.9677	NA	76.09	C10H18O2	Lipids and lipid-like molecules	Fatty Acyls	NA	NA	NA	trans-Dec-2-enoic acid;8-Methylnonenoate;5Z-Octenyl acetate;Methyl (xi)-3-nonenoate;(&#177;)-6-Methyl-5-hepten-2-yl acetate;3-Decenoic acid;9-Decenoic acid;2-Octenyl acetate;Cyclohexylethyl acetate;Linalool oxide (trans-pyranoid);Linalool oxide III;4-Hydroxy-2,6-dimethyl-7-octen-3-one;Ethyl 3-octenoate;2-Methylbutyl 3-methyl-2-butenoate;1-Octen-3-yl acetate;6-Decanolide;cis-3-Hexenyl butyrate;Cyc…	143303	428535	334578	527303	393978	738676	582643	789274	1.48822e+06	563800	323947	1.29911e+06	225293	188941	2.94572e+06	809113	2.43826e+06	926392	1.41807e+06	1.03112e+06	657665	918591	585053	1.38413e+06	1.19904e+06	1.05908e+06	1.01195e+06	1.31537e+06	918827	573400	1.26425e+06	0.4535	down	0.000405967	0.00867453	2.07123	yes
NEG	NEG_169.123_6.2993	169.123	6.2993	NA	90.34	C10H18O2	Lipids and lipid-like molecules	Fatty Acyls	HMDB0035122	NA	NA	trans-Dec-2-enoic acid;8-Methylnonenoate;5Z-Octenyl acetate;Methyl (xi)-3-nonenoate;(&#177;)-6-Methyl-5-hepten-2-yl acetate;3-Decenoic acid;9-Decenoic acid;2-Octenyl acetate;Cyclohexylethyl acetate;Linalool oxide (trans-pyranoid);Linalool oxide III;4-Hydroxy-2,6-dimethyl-7-octen-3-one;Ethyl 3-octenoate;2-Methylbutyl 3-methyl-2-butenoate;1-Octen-3-yl acetate;6-Decanolide;cis-3-Hexenyl butyrate;Cyc…	6.79346e+06	1.75228e+07	2.08948e+07	2.37072e+07	1.19729e+07	4.26527e+07	6.14485e+06	2.55594e+07	5.06205e+07	2.73477e+07	1.03351e+07	5.39779e+07	3.45135e+06	5.03531e+06	1.31831e+08	3.26811e+07	9.07334e+07	3.43942e+07	5.4146e+07	2.46915e+07	2.19937e+07	2.87802e+07	2.89768e+07	4.85314e+07	4.07662e+07	3.49241e+07	5.04208e+07	3.59491e+07	3.44584e+07	2.18583e+07	4.70585e+07	0.4645	down	0.00201001	0.0259527	2.04882	yes
NEG	NEG_170.127_4.972	170.127	4.972	NA	NA	NA	NA	NA	NA	NA	NA	NA	5707.35	24048.7	18883.6	24760.6	20908.6	68282.1	38155.4	54119.4	147127	35356.7	3841.98	140540	8324.87	5647.61	374763	65224.2	268519	80897.9	144228	100457	47226.3	69003.7	28459.4	127200	115651	79561.5	93954.5	126735	82770.9	42550.3	122991	0.346	down	0.000676145	0.0121527	2.58271	yes
NEG	NEG_170.127_6.2985	170.127	6.2985	NA	NA	NA	NA	NA	NA	NA	NA	NA	734605	1.78172e+06	2.38041e+06	2.57321e+06	1.2586e+06	4.40347e+06	688087	2.70417e+06	5.72038e+06	2.68577e+06	1.20527e+06	5.80051e+06	363914	287945	1.4547e+07	3.35067e+06	1.04545e+07	3.43547e+06	6.13237e+06	2.55934e+06	2.49533e+06	3.09307e+06	3.22575e+06	5.1105e+06	4.44914e+06	3.65588e+06	5.56525e+06	3.64661e+06	3.72532e+06	2.32772e+06	5.12292e+06	0.4544	down	0.00246529	0.0299981	2.09974	yes
NEG	NEG_171.027_0.8163	171.027	0.8163	NA	NA	NA	NA	NA	NA	NA	NA	Fluroxene;Sodium lactate	1.2994e+08	7.97592e+07	1.01475e+08	1.17079e+08	7.12088e+07	1.24351e+08	1.36256e+08	1.31644e+08	1.1677e+08	6.99827e+07	1.02446e+08	9.75702e+07	1.13531e+08	9.51524e+07	1.64734e+08	1.82791e+08	1.44406e+08	1.67166e+08	1.34845e+08	1.51103e+08	1.62206e+08	1.53187e+08	1.73569e+08	1.58813e+08	1.73989e+08	1.82502e+08	1.2114e+08	1.60847e+08	1.32802e+08	1.06226e+08	1.59378e+08	0.6665	down	3.71434e-06	0.000287839	1.5322	yes
NEG	NEG_172.142_5.2122	172.142	5.2122	NA	NA	NA	NA	NA	NA	NA	NA	NA	45815	71835.8	64877.8	39503.2	48376.6	110056	57049.2	45770.5	311252	41827.9	50254	359097	41416.8	34081.3	545895	134301	560584	85991.2	368765	180274	115156	135452	58469.4	158493	269100	151195	243232	219155	162403	94372.3	230433	0.4095	down	0.000592412	0.0111983	2.15211	yes
NEG	NEG_173.009_1.3442	173.009	1.3442	NA	NA	NA	NA	NA	NA	NA	NA	cis-Aconitic acid;trans-Aconitic acid;Dehydroascorbic acid;2,5-Dimethyl-3-(methyldithio)furan;Dehydroascorbide(1-);Aconitic acid;p-TOLUENESULFONYL FLUORIDE;Phenylmethylsulfonyl fluoride;5-Hydroxy-2-furoic acid;Methylendiglyoxal;Acetylenedicarboxylic acid;Squaric acid	773854	442692	1.23983e+06	1.11264e+06	321837	394444	546861	382301	888686	1.03993e+06	1.13581e+06	932432	531323	214610	439335	332239	242461	440316	411164	261536	301211	395566	240180	460608	341224	384031	275973	404952	531716	711232	352200	2.0194	up	0.00155069	0.0216355	1.64424	yes
NEG	NEG_173.104_0.7459	173.104	0.7459	NA	NA	NA	NA	NA	NA	NA	NA	L-Arginine;D-Arginine;Adipic dihydrazide;DL-Arginine;2-Amino-4-[carbamimidoyl(methyl)amino]butanoic acid;Isobutylidene	2.34989e+06	3.4104e+06	2.27822e+06	3.86477e+06	4.27154e+06	1.58016e+06	2.8151e+06	4.58752e+06	3.43738e+06	2.59233e+06	3.07777e+06	2.27452e+06	4.72406e+06	3.80335e+06	1.64915e+06	1.03475e+06	2.63694e+06	2.0594e+06	777889	1.26156e+06	1.04587e+06	2.23514e+06	1.47195e+06	1.92485e+06	1.49827e+06	1.89841e+06	1.3479e+06	982451	2.38898e+06	3.21907e+06	1.5589e+06	2.065	up	4.15269e-06	0.000307114	1.97968	yes
NEG	NEG_174.002_0.9423	174.002	0.9423	NA	NA	NA	NA	NA	NA	NA	NA	NA	1.5135e+07	1.38726e+07	1.9973e+07	1.99221e+07	1.4596e+07	2.28534e+07	2.1549e+07	2.31043e+07	1.97401e+07	1.33795e+07	1.55661e+07	1.38402e+07	1.75395e+07	1.88143e+07	2.73317e+07	2.441e+07	2.66168e+07	2.34052e+07	2.14062e+07	2.47804e+07	2.81161e+07	2.72763e+07	2.68176e+07	2.3875e+07	2.70289e+07	2.68308e+07	2.12735e+07	2.59365e+07	2.16068e+07	1.78489e+07	2.53646e+07	0.7037	down	5.00428e-06	0.000354346	1.42645	yes
NEG	NEG_174.934_9.3077	174.934	9.3077	NA	NA	NA	NA	NA	NA	NA	NA	Iron(II) carbonate (FeCO3)	1.41081e+07	3.81852e+07	4.70298e+07	1.61519e+07	2.67913e+07	1.90073e+07	2.71236e+07	4.40601e+07	1.71843e+07	1.22082e+07	2.9461e+07	4.78955e+07	3.54902e+07	3.09003e+07	1.89009e+07	4.9601e+07	1.00055e+07	1.24131e+07	1.25603e+07	1.20249e+07	1.19066e+07	1.78193e+07	1.31592e+07	1.80692e+07	1.16724e+07	1.46619e+07	1.86437e+07	1.56462e+07	2.29529e+07	2.89712e+07	1.69346e+07	1.7108	up	0.00268343	0.0320296	1.51346	yes
NEG	NEG_175.005_0.9564	175.005	0.9564	NA	NA	NA	NA	NA	NA	NA	NA	NA	216293	170087	457046	344249	159421	454731	327697	561788	347051	382842	264636	165600	91057.8	305202	599752	573162	589223	589396	495491	543859	778213	667907	646019	539598	596001	637566	379798	561580	444474	303407	585540	0.5182	down	7.88558e-05	0.00265754	1.96205	yes
NEG	NEG_177.165_5.4441	177.165	5.4441	NA	NA	NA	NA	NA	NA	NA	NA	NA	2090.75	27481.6	54446.8	49945.6	15553.8	119998	154352	58813.9	84540	53817.6	60225.5	90938.8	19608.5	50013.7	153429	110680	166316	72336.8	97995.3	52907.1	76124.5	81164.2	122846	117216	96397.7	81531.1	112396	100045	81543.2	60130.4	102956	0.584	down	0.0131122	0.0990632	1.79007	yes
NEG	NEG_177.165_6.8529	177.165	6.8529	NA	NA	NA	NA	NA	NA	NA	NA	NA	27032.8	17346.1	132295	35078.5	92349.2	618781	26858.4	174671	517508	74086.1	11863.3	836030	96383.8	71821.9	1.25165e+06	231447	775023	316856	567652	645986	316404	285968	1.47131e+06	1.46902e+06	2.29635e+06	312168	1.15156e+06	320902	505157	195150	815164	0.2394	down	0.000101331	0.00320409	3.11561	yes
NEG	NEG_179.18_5.7419	179.18	5.7419	NA	NA	NA	NA	NA	NA	NA	NA	NA	46467.2	41768.1	72635.7	88255.5	26248.6	178458	217056	34831.1	106861	56957	60153.2	115916	11504.6	4828.08	192352	233428	155400	78587.3	158251	60406.6	102971	136840	144919	75520.3	120877	92531.7	176173	132238	104373	75852.9	132892	0.5708	down	0.00873615	0.0738688	1.8434	yes
NEG	NEG_181.123_6.2	181.123	6.2	NA	NA	NA	NA	NA	NA	NA	NA	2,2,7,7-Tetramethyl-1,6-dioxaspiro[4.4]non-3-ene;Linalyl formate;alpha-Terpineol formate;5-Pentyl-3h-furan-2-one;Methyl 4,8-decadienoate;Methyl (2E,4Z)-decadienoate;Neryl formate;4-Hydroxy-4-methyl-7-decenoic acid gamma-lactone;Ethyl octynecarboxylate;Tsibulin 2;6-(3-Hexenyl)tetrahydro-2H-pyran-2-one;xi-2-Hexyl-5-methyl-3(2H)-furanone;(3E,6Z)-Nonadien-1-yl acetate;(2E,6Z)-2,6-Nonadien-1-Yl acetat…	134785	151146	134374	93284.5	94938	133540	195399	156420	194215	146819	154749	256286	60427.8	65632.1	373042	394976	263074	135921	231667	137357	85883.7	217970	272346	101429	150923	172372	236813	222331	177433	140858	214008	0.6582	down	0.0210829	0.137173	1.14487	yes
NEG	NEG_183.027_0.7877	183.027	0.7877	NA	NA	NA	NA	NA	NA	NA	NA	Dibenzothiophene;3-(Methylthio)propyl acetate;Ethyl 3-mercaptobutyrate;Methyl 3-(methylthio)butanoate;Propyl 2-mercaptopropionate;3-Mercapto-3-methylbutyl formate;Methyl 4-(methylthio)butyrate;Methylthiomethyl butyrate;2,4,6-Trimethyl-1,3,5-dioxathiane;Ethyl 3-(methylthio)propanoate;Methyl 2-(methylthio)butyrate;(+/-)-3-Mercapto-1-butyl acetate;2-Chloroethyl ethyl sulfide	823137	753832	788959	996364	737484	811519	1.19591e+06	743394	681763	792278	889615	557965	804458	1.13057e+06	385436	560139	502167	459534	643243	521048	485824	490583	356429	694350	463877	188298	557597	485537	660761	836232	485290	1.7232	up	1.00723e-05	0.000595923	1.73221	yes
NEG	NEG_183.03_3.8468	183.03	3.8468	NA	NA	NA	NA	NA	NA	NA	NA	3,4-Dihydroxymandelic acid;4-O-Methylgallic acid;Methyl 2,4,6-trihydroxybenzoate;Methyl gallate;4-Hydroxybenzoic acid;Salicylic acid;3-Hydroxybenzoic acid;Gentisate aldehyde;2-Methoxy-1,4-benzoquinone;alpha-Furyl methyl diketone;Sesamol;3,4-Dihydroxybenzaldehyde;keratan sulfate II (core 2-linked), degradation product 1;3,6-Dihydroxycyclohepta-2,4,6-trien-1-one;keto-1,4-benzoquinone	1.1582e+07	3.49535e+07	4.65351e+07	4.58361e+07	3.16988e+06	1.57347e+06	2.31398e+06	1.97948e+07	3.27622e+06	7.38574e+06	1.42914e+07	8.97927e+06	3.04941e+06	1.40593e+07	6.14705e+07	534496	2.33891e+07	2.99295e+06	2.01123e+06	2.14486e+06	3.28857e+06	503605	2.20369e+06	2.45081e+06	3.1914e+06	1.05766e+06	1.01406e+07	7.95201e+06	1.21476e+07	1.54857e+07	8.80939e+06	1.7579	up	0.0435866	0.214517	1.65207	yes
NEG	NEG_184.033_3.8471	184.033	3.8471	NA	NA	NA	NA	NA	NA	NA	NA	NA	979728	3.00991e+06	4.05902e+06	3.99811e+06	255264	92305.2	158795	1.65898e+06	250373	633651	1.29693e+06	788087	234566	1.2137e+06	5.53079e+06	21529.9	2.08074e+06	234117	156026	156797	271418	29466.9	163212	188511	269783	77570.2	860765	669767	1.04785e+06	1.33067e+06	765035	1.7394	up	0.0486828	0.228244	1.69776	yes
NEG	NEG_184.142_6.6173	184.142	6.6173	NA	NA	NA	NA	NA	NA	NA	NA	NA	1.48263e+06	1.94781e+06	1.7285e+06	1.80396e+06	702262	3.13167e+06	2.41875e+06	1.14702e+06	2.99401e+06	1.79989e+06	1.13982e+06	3.30594e+06	873002	448152	3.51767e+06	7.45552e+06	2.73104e+06	1.58268e+06	2.684e+06	1.42966e+06	2.05105e+06	3.41802e+06	4.45546e+06	1.96108e+06	3.04862e+06	2.85791e+06	4.37384e+06	2.72675e+06	2.47203e+06	1.78024e+06	3.16381e+06	0.5627	down	0.0038589	0.0411946	1.57051	yes
NEG	NEG_185.118_4.8581	185.118	4.8581	NA	86.3	C10H18O3	Lipids and lipid-like molecules	Fatty Acyls	NA	NA	NA	3-Oxodecanoic acid;Ethyl (3R,5Z)-3-hydroxy-5-octenoate;3-Hydroxy-5Z-octenyl acetate;(1S,2S,4S,5R)-1,8-Epoxy-p-menthane-2,5-diol;6-Methyl-2-methylene-6-octene-1,3,8-triol;(1beta,2beta,5beta)-p-Menth-3-ene-1,2,5-triol;(E)-10-Hydroxy-8-decenoic acid;6-Hexyl-1,4-dioxan-2-one;5-Hexyl-1,4-dioxan-2-one;2-Methylbutyl 3-hydroxy-2-methylidenebutanoate;3-Methylbutyl 3-hydroxy-2-methylidenebutanoate;exo,exo-…	5.67598e+06	7.38492e+06	2.58861e+06	1.28306e+07	3.62375e+06	2.77278e+06	7.504e+06	1.71369e+07	3.71549e+06	9.00423e+06	4.16873e+06	5.27028e+06	3.3832e+06	2.07149e+06	3.3312e+06	3.5103e+06	3.4679e+06	2.87536e+06	3.6812e+06	2.47593e+06	3.65911e+06	2.37897e+06	3.39422e+06	3.4801e+06	2.11749e+06	2.59117e+06	2.52147e+06	3.06522e+06	4.63145e+06	6.22364e+06	3.03926e+06	2.0477	up	0.00666251	0.0609867	1.49155	yes
NEG	NEG_187.001_0.8345	187.001	0.8345	NA	NA	NA	NA	NA	NA	NA	NA	Xanthine;Oxypurinol;6,8-Dihydroxypurine;Alloxan;Phosphoric acid hydroxymethyl ester;Potassium lactate	2.36554e+06	1.74175e+06	2.07281e+06	3.27851e+06	1.77155e+06	2.76245e+06	3.72359e+06	1.37823e+06	3.46361e+06	1.6558e+06	849603	2.37137e+06	4.28658e+06	2.43234e+06	2.68127e+06	1.39673e+07	2.69098e+06	8.9125e+06	3.69873e+06	3.02822e+06	1.57908e+07	8.3734e+06	1.99174e+06	2.31857e+07	4.04742e+06	3.75718e+06	1.77286e+06	2.56971e+06	4.66506e+06	2.43955e+06	6.89056e+06	0.354	down	0.0058485	0.0555316	1.70527	yes
NEG	NEG_188.017_1.0145	188.017	1.0145	NA	NA	NA	NA	NA	NA	NA	NA	NA	2.33633e+06	340173	595678	279219	451190	323439	178783	283534	257145	480320	310231	264833	310260	703272	155973	94742.8	157000	124066	238092	297369	184737	324293	229526	189057	178467	229153	290106	210993	357785	508172	207398	2.4502	up	0.00164566	0.0224687	1.70221	yes
NEG	NEG_188.137_5.3344	188.137	5.3344	NA	NA	NA	NA	NA	NA	NA	NA	NA	394994	97840.2	123465	228694	622360	310845	120829	143661	233281	104828	103359	547255	27238.8	41691.2	635911	278735	285798	204605	311259	1.47138e+06	167155	188738	193008	561542	312482	271706	393141	254390	308221	221453	394989	0.5607	down	0.0199522	0.132211	1.51121	yes
NEG	NEG_189.04_0.8219	189.04	0.8219	NA	NA	NA	NA	NA	NA	NA	NA	5-(Methylthio)-2-[(methylthio)methyl]-2-pentenal;2-Hydroxy-2-(2-oxopropyl)butanedioic acid;1,1'-Oxalyldiimidazole;3-Hexenedioic acid;3-Methylglutaconic acid;(E)-2-Methylglutaconic acid;trans-2-Hexenedioic acid;3-Hydroxyadipic acid 3,6-lactone;Dimethyl fumarate;Maleic acid homopolymer;Ethyl hydrogen fumarate;Dimethyl maleate;2-Ethylbut-2-enedioic acid;2,3-Dimethylbut-2-enedioic acid;3,6-Dimethyl-1…	1.18226e+06	1.74964e+06	1.54752e+06	1.59194e+06	2.05321e+06	1.10155e+06	981982	1.22273e+06	1.65737e+06	1.26534e+06	648319	719364	1.44284e+06	1.56161e+06	415201	649918	747477	1.48838e+06	662524	983540	481952	874822	737375	1.0834e+06	941548	754786	677428	632331	1.0663e+06	1.33755e+06	795049	1.6823	up	0.000260941	0.00646862	1.53256	yes
NEG	NEG_189.095_5.8382	189.095	5.8382	NA	79.78	C9H18O2S	Lipids and lipid-like molecules	Fatty Acyls	HMDB0032346	NA	NA	NA	7417.09	119500	85626.7	143503	70781.5	92005.5	130214	121067	185189	175093	144095	146345	48250.3	31228.1	181692	297760	160236	82187.2	175485	88048.2	139857	212525	307232	211411	136550	185594	100348	178536	141349	107165	175533	0.6105	down	0.0205633	0.134714	1.48149	yes
NEG	NEG_190.035_0.6209	190.035	0.6209	NA	NA	NA	NA	NA	NA	NA	NA	Isosorbide Mononitrate;gamma-Carboxyglutamic acid;(2s,3r,4s,5r)-3,4,5-Trihydroxy-6-oxopiperidine-2-carboxylic acid;Isosorbide 2-nitrate;Nitrilotriacetic acid;O-Oxalylhomoserine;2-Keto-glutaramic acid;Iminoaspartic acid;2-Oxosuccinamate	1.81112e+07	2.0248e+07	2.13485e+07	1.81636e+07	2.22611e+07	1.79322e+07	1.89317e+07	1.77363e+07	2.16235e+07	2.5058e+07	1.9352e+07	1.85788e+07	586628	382712	221867	2.51045e+07	2.42023e+07	210102	432380	56951.5	160892	405835	2.41419e+07	9215.07	597469	149417	35124.4	105930	1.1291e+07	1.71653e+07	5.41671e+06	3.169	up	0.00023854	0.00602551	4.08213	yes
NEG	NEG_195.139_6.5791	195.139	6.5791	NA	83.39	C12H20O2	Lipids and lipid-like molecules	Fatty Acyls	NA	NA	NA	Dihydro-5-(2-octenyl)-2(3H)-furanone;Methyl 2-undecynoate;6-Heptyl-5,6-dihydro-2H-pyran-2-one;cis-3-Hexenyl trans-4-hexenoate;alpha-Terpineol acetate;alpha-Campholene acetate;(Z)-4-Hydroxy-6-dodecenoic acid lactone;Yuzu lactone;(3R,3aR,7aS)-3-Butylhexahydro-1(3H)-isobenzofuranone;Artemisia alcohol acetate;Ethyl 2Z,4E-decadienoic acid;p-Menth-1-en-9-ol acetate;cis-3-Hexenyl cis-3-hexenoate;cis-3-H…	4.29649e+06	7.54665e+06	1.02217e+07	6.75764e+06	6.54608e+06	2.54665e+07	1.12319e+07	1.23588e+07	1.8989e+07	1.32141e+07	7.07438e+06	2.40384e+07	5.40242e+06	4.5062e+06	2.81405e+07	1.49378e+07	3.00414e+07	1.58183e+07	1.7015e+07	1.48351e+07	1.56247e+07	1.76775e+07	1.89096e+07	2.89476e+07	2.24584e+07	1.51543e+07	2.54474e+07	1.52646e+07	1.56401e+07	1.12607e+07	2.00194e+07	0.5625	down	0.000667769	0.0120816	1.85401	yes
NEG	NEG_197.154_5.4965	197.154	5.4965	NA	81.38	C12H22O2	Lipids and lipid-like molecules	Fatty Acyls	NA	NA	NA	trans-Dodec-2-enoic acid;Methyl 10-undecenoate;Allyl nonanoate;xi-Dihydro-5-octyl-2(3H)-furanone;cis-4-Decenyl acetate;2,6-Dimethyl-5-heptenal propyleneglycol acetal;11-Dodecenoic acid;cis-3-Hexenyl hexanoate;(&#177;)-Citronellyl acetate;5,5-Dibutyl-4,5-dihydro-2(3H)furanone;Rhodinyl acetate;Methyl 9-undecenoate;Ethyl 2-decenoate;1-Ethenylhexyl butanoate;xi-5-Dodecanolide;3-Heptyldihydro-5-methyl…	263644	132968	170023	266732	164066	371876	243599	188013	776938	175525	88403.4	942890	74661.2	37585.9	1.2578e+06	446657	1.33116e+06	405697	757871	637797	386850	534983	259345	735869	857976	446264	796923	919131	488259	278352	698166	0.3987	down	0.000240287	0.00604669	2.36337	yes
NEG	NEG_198.023_4.7838	198.023	4.7838	NA	NA	NA	NA	NA	NA	NA	NA	S-Oxide;Thiobenzamide S-oxide	104149	177660	145604	60253.6	127683	66269.7	208302	89464.8	184152	120921	92115.7	87677.3	114117	102135	95945.3	37701.3	51930.7	144591	75573.7	96191.2	69948.8	62819.5	60525.4	84298.3	56772.5	75628.6	59037.7	51906.6	96549.1	120036	73062.2	1.6429	up	0.00108804	0.0168684	1.43176	yes
NEG	NEG_198.074_0.8328	198.074	0.8328	NA	NA	NA	NA	NA	NA	NA	NA	NA	1.41799e+07	2.2909e+07	2.74882e+07	2.62449e+07	2.71424e+07	1.96963e+07	2.33226e+07	2.60272e+07	2.8672e+07	2.20636e+07	1.86061e+07	2.16256e+07	2.53487e+07	2.85468e+07	1.33431e+07	1.16938e+07	1.51235e+07	1.95649e+07	2.0631e+07	2.22639e+07	2.1669e+07	2.14448e+07	1.04717e+07	1.99725e+07	2.19025e+07	1.62379e+07	1.25047e+07	9.63111e+06	2.02974e+07	2.37052e+07	1.68896e+07	1.4035	up	0.00101379	0.0160279	1.25213	yes
NEG	NEG_198.158_5.4958	198.158	5.4958	NA	NA	NA	NA	NA	NA	NA	NA	NA	15929	2192.53	9246.78	6546.77	6303.02	30890.5	13790.1	36371	79800.2	4365.36	1754.46	105893	15667.6	6859.35	160938	35472.2	183421	23050.9	92407.9	83547.8	27071.1	45492.2	24600.6	69981.1	81170	79227.8	104872	88353	51257.7	23972.1	78543.3	0.3052	down	0.000207609	0.00544046	2.83957	yes
NEG	NEG_198.158_6.9985	198.158	6.9985	NA	NA	NA	NA	NA	NA	NA	NA	NA	1.27326e+06	671637	2.0519e+06	812883	668329	6.02186e+06	695914	683700	6.8452e+06	827189	424207	1.04559e+07	237300	88999.1	1.33383e+07	3.82689e+06	1.21003e+07	3.84814e+06	6.06186e+06	4.14619e+06	3.80619e+06	4.25702e+06	4.41424e+06	7.41271e+06	1.18817e+07	4.78655e+06	1.44578e+07	4.92212e+06	4.67923e+06	2.26845e+06	7.09e+06	0.32	down	0.000174739	0.00480605	3.00442	yes
NEG	NEG_199.011_1.2479	199.011	1.2479	NA	NA	NA	NA	NA	NA	NA	NA	2H-Benzimidazole-2-thione, 1,3-dihydro-4-methyl-;2-Aminothiazole;2-Mercaptoimidazole;1,4-Dithiothreitol;(2R,3S)-3,4-DImercaptobutane-1,2-diol;2-Hydroxyethyl disulfide;Dithioerythritol	182520	177265	129804	116194	208956	86463.6	191698	126462	248954	115133	140507	219462	1.18575e+06	51228.8	159468	128907	177149	86390.6	119782	103679	157240	117568	55608.9	136675	47932.9	73718.6	114597	83688.2	169386	227171	111600	2.0356	up	0.0452239	0.218775	1.15258	yes
NEG	NEG_199.038_0.8239	199.038	0.8239	NA	NA	NA	NA	NA	NA	NA	NA	L-Fucose;Rhamnose;1,5-Anhydrosorbitol;beta-D-Fucose;3-Deoxyfructose;2-Deoxygalactopyranose;D-Fucose;Butyl isopropyl disulfide;Butyl propyl disulfide;2-O-Methyl-D-xylose;1-(Methylthio)-1-hexanethiol;beta-L-Fucose;L-Fuculose;2-Deoxyglucose;(2R,3R,4S,5S)-2,3,4,5-Tetrahydroxyhexanal;(2R,4S,5R)-2,4,5,6-Tetrahydroxyhexanal;(2R,4R,5R)-1,2,4,5-Tetrahydroxyhexan-3-one;(14C)-Deoxyglucose;1,5-Anhydro-d-mann…	2.03172e+07	2.27458e+07	1.73152e+07	1.52112e+07	2.4166e+07	1.30071e+07	1.76569e+07	7.32788e+06	1.64151e+07	1.51933e+07	1.59405e+07	9.14479e+06	2.2176e+07	2.34631e+07	1.35099e+07	1.19899e+07	1.29105e+07	6.17117e+06	6.90928e+06	8.04829e+06	8.88786e+06	1.16908e+07	7.66236e+06	115971	1.01063e+07	1.01009e+07	5.41019e+06	1.21323e+07	1.30616e+07	1.71486e+07	8.9747e+06	1.9108	up	0.0195668	0.130302	1.70109	yes
NEG	NEG_199.097_3.9141	199.097	3.9141	NA	72.3	C10H16O4	Lipids and lipid-like molecules	Fatty Acyls	NA	NA	NA	cis-4-Decenedioic acid;cis-5-Decenedioic acid;5-Pentyltetrahydro-2-oxo-3-furancarboxylic acid;alpha-Carboxy-delta-nonalactone;(&#177;)-Camphoric acid;(1R,2R,3S,1'R)-Nepetalinic acid;Matsutakic acid A;Hydralazine acetone hydrazone;2-Hydroxycampholonic acid;Senecioic acid;Tiglic acid;2-Ethylacrylic acid;3-Methylbutyrolactone;Glutaral;Angelic acid;2-Methyltetrahydrofuran-3-one;2,3-Pentanedione;4-Pen…	1.13338e+06	62491.8	250730	2.39767e+06	234176	241719	644011	1.34864e+06	220131	627276	340826	257464	294725	283031	225340	276034	238344	234749	156042	252047	226180	243235	207649	268216	228097	215745	205058	247281	412867	595448	230287	2.5857	up	0.0484051	0.227853	1.22482	yes
NEG	NEG_200.017_1.4014	200.017	1.4014	NA	NA	NA	NA	NA	NA	NA	NA	Ethiin;2-Hydroxy-L-methionine;D-Methionine (S)-S-oxide;(&#177;)-Methamidophos	337492	219937	279480	325995	162410	365278	456671	254992	489632	177271	265645	286673	192453	131293	354263	378605	238296	423410	361280	181229	290673	764789	233669	352614	514337	307537	1.43507e+06	399727	363597	281802	445393	0.6327	down	0.0400725	0.203917	1.05045	yes
NEG	NEG_200.01_4.2253	200.01	4.2253	NA	NA	NA	NA	NA	NA	NA	NA	2-Chloro-5-hydroxyphenylglycine;2-(2-Chloro-5-hydroxyanilino)acetic acid;4-Pyridoxolactone;Formylanthranilic acid;5-Pyridoxolactone;Noradrenochrome;6-Methoxy-2(3H)-benzoxazolone;(R)-2-Hydroxy-2H-1,4-benzoxazin-3(4H)-one;D-Xylonate;L-Xylonate;4'-Nitroacetophenone;Phthalamic acid	1.05859e+06	712789	305118	800927	428141	234956	202150	316903	285863	252542	292764	134032	347555	431672	71334.1	163451	60240.8	132428	46502.5	82896.8	53683.1	35395.4	81439.3	267347	53262	41527.7	37008.8	24082.3	248379	414572	82185.7	5.0443	up	1.02811e-07	1.53777e-05	3.11893	yes
NEG	NEG_200.173_7.4201	200.173	7.4201	NA	NA	NA	NA	NA	NA	NA	NA	NA	1.55075e+07	1.40652e+07	1.80862e+07	1.16295e+07	1.63624e+07	1.68225e+08	1.7595e+07	1.53147e+07	2.87377e+07	1.79379e+07	1.85823e+07	3.58563e+07	1.67537e+07	1.69697e+07	5.56828e+07	3.0515e+07	3.65884e+07	3.47149e+07	5.74131e+07	2.49342e+07	3.8288e+07	2.9072e+07	2.63271e+07	6.23807e+07	5.74799e+07	3.95201e+07	6.60661e+07	4.04094e+07	3.61077e+07	2.94016e+07	4.28137e+07	0.6867	down	0.0033804	0.0376017	1.65449	yes
NEG	NEG_200.174_5.8044	200.174	5.8044	NA	NA	NA	NA	NA	NA	NA	NA	NA	7870.09	31536.4	13304.6	10160.7	22181.5	80103.3	29701.1	8358.42	149809	28770.3	2666.36	168517	3640.61	6246.65	194418	73741.8	205835	53625.1	172487	95668.1	61182.7	70322.1	35774.9	102586	145133	57862.4	103233	149197	74426.2	40204.7	108648	0.37	down	0.00039383	0.00855479	2.78449	yes
NEG	NEG_200.1_3.9015	200.1	3.9015	NA	NA	NA	NA	NA	NA	NA	NA	NA	100586	4294.6	5511.72	225242	8224.33	24381.6	49302	124520	10780.6	43250.8	13634.9	5056.72	126801	127165	3758.76	34821	8262.99	9982.81	32424.6	4434.07	7899.39	4754.32	4385.25	12289.6	8248.34	1775.83	30903.8	35649.2	38155.1	62053.7	14256.4	4.3527	up	0.0205557	0.134714	1.85975	yes
NEG	NEG_201.038_0.8444	201.038	0.8444	NA	NA	NA	NA	NA	NA	NA	NA	2,5-Difluorobenzaldehyde;Sodium diacetate	2.39718e+08	8.44025e+07	1.50862e+08	2.4411e+08	6.21547e+07	2.63707e+08	3.20452e+08	3.21602e+08	2.18883e+08	6.65245e+07	1.35322e+08	1.29617e+08	1.40812e+08	1.157e+08	4.40653e+08	5.05647e+08	3.63926e+08	4.88298e+08	3.47207e+08	3.34958e+08	4.56153e+08	3.91291e+08	4.25876e+08	4.23712e+08	4.6122e+08	5.17693e+08	2.56487e+08	4.61741e+08	2.98883e+08	1.78133e+08	4.19633e+08	0.4245	down	1.13173e-05	0.000635678	2.30498	yes
NEG	NEG_201.177_7.4191	201.177	7.4191	NA	NA	NA	NA	NA	NA	NA	NA	Tributylphosphine	428665	389627	377154	353454	406195	8.7848e+06	755869	344878	1.33273e+06	476989	714232	1.92664e+06	246570	637878	2.71913e+06	1.32609e+06	1.85115e+06	1.65497e+06	2.92555e+06	1.1247e+06	1.75836e+06	948189	996478	2.95492e+06	2.86802e+06	1.81116e+06	3.39284e+06	1.82519e+06	1.61902e+06	1.22683e+06	2.0112e+06	0.61	down	0.0013157	0.0193318	2.13929	yes
NEG	NEG_202.041_0.8436	202.041	0.8436	NA	NA	NA	NA	NA	NA	NA	NA	Magnesium cyclamate;Carbazole;(2E)-2-butylidene-4-hydroxy-5-methyl-3(2H)-furanone;6-isobutyl-4-hydroxy-2-pyrone	1.55701e+07	5.52986e+06	9.9587e+06	1.63572e+07	3.94556e+06	1.71162e+07	2.13314e+07	2.20854e+07	1.46273e+07	4.06119e+06	9.28961e+06	8.69852e+06	9.59577e+06	7.51552e+06	2.97673e+07	3.27703e+07	2.50531e+07	3.119e+07	2.33393e+07	2.19497e+07	3.14684e+07	2.4415e+07	3.01083e+07	2.83015e+07	3.07349e+07	3.25857e+07	1.74091e+07	2.95977e+07	1.9799e+07	1.18345e+07	2.77636e+07	0.4263	down	1.63251e-05	0.000842324	2.29926	yes
NEG	NEG_202.051_3.5886	202.051	3.5886	NA	NA	NA	NA	NA	NA	NA	NA	Indolepyruvate;2-Amino-2,3,6,7-tetrahydro-1H-pteridin-4-one;tetrahydropterin;1-nitrosonaphthalene	522578	495183	830153	557341	777771	327064	510998	553919	539632	818593	563751	421892	904293	630524	521785	495051	450519	597190	391866	426662	817524	370754	340564	336185	486680	290727	284119	269292	519022	603835	434208	1.3907	up	0.00541622	0.0527052	1.11702	yes
NEG	NEG_202.153_5.6315	202.153	5.6315	NA	NA	NA	NA	NA	NA	NA	NA	NA	12059.2	13448.8	34494	17278.8	3707.26	31367.1	47267	48041.7	123997	50148.8	26751.4	229307	176263	50295.6	107275	135623	94599.3	74926.8	132711	56109.6	29577.7	55258.8	128988	57034.2	35394	55364.5	102946	65113.4	71262.4	61744.8	80780.1	0.7644	down	0.0484498	0.227983	1.42168	yes
NEG	NEG_203.042_0.8532	203.042	0.8532	NA	NA	NA	NA	NA	NA	NA	NA	2-Methylthio-3-isopropylpyrazine;Ethylene thiourea;Ethylidenethiourea;Allantoin;1-(5-Hydroxy-2-oxo-2,3-dihydroimidazol-4-yl)urea	1.40299e+06	2.56608e+06	1.76685e+06	2.22646e+06	2.27662e+06	1.50055e+06	2.53415e+06	2.74765e+06	2.33133e+06	1.98698e+06	2.17729e+06	1.52479e+06	2.01473e+06	2.39403e+06	4.32458e+06	4.57842e+06	3.1969e+06	4.41664e+06	2.64005e+06	2.74121e+06	4.97995e+06	3.15864e+06	4.52855e+06	4.17975e+06	4.41243e+06	5.20654e+06	2.15276e+06	4.21166e+06	3.00638e+06	2.10361e+06	3.90915e+06	0.5381	down	6.58212e-07	7.30177e-05	1.89137	yes
NEG	NEG_203.129_4.3435	203.129	4.3435	NA	NA	NA	NA	NA	NA	NA	NA	NA	113129	130714	72842.5	324385	78035.3	133985	216199	79159.3	76489.6	345735	535176	88621.8	111036	44645.2	92075.1	88721.5	84769.3	60235.6	83747.1	76449.2	69927.7	53017.2	209804	137748	66746.8	76075.6	85638.6	50153.5	128045	167868	88222.1	1.9028	up	0.0439319	0.215562	1.12992	yes
NEG	NEG_203.18_7.096	203.18	7.096	NA	NA	NA	NA	NA	NA	NA	NA	delta-Amorphene;(-)-3,5-Cadinadiene;alpha-Santalene;Sesquisabinene;beta-Selinene;Aristolene;2,7,10-Bisabolatriene;Sesquithujene;Daucene;Valencene;(2Z,4E,6E)-2,4,6,10-Farnesatetraene;alpha-Selinene;beta-Farnesene;beta-Bisabolene;alpha-Guaiene;alpha-Cyperene;alpha-Farnesene;(3Z,6E)-alpha-Farnesene;(Z)-2,6,10-Bisabolatriene;beta-Sesquiphellandrene;Zingiberene;(R)-2,5,11-Bisabolatriene;beta-Santalene…	183074	54188.7	202883	36332	72244	532340	30633.4	94873.7	379226	63514.6	109511	1.59304e+06	91508.3	71653.1	877861	604654	494837	433815	550556	995269	489983	551752	657501	688341	1.18145e+06	571469	968376	514160	467680	251073	684287	0.3669	down	6.89324e-05	0.00240847	2.91571	yes
NEG	NEG_204.066_4.5224	204.066	4.5224	NA	NA	NA	NA	NA	NA	NA	NA	Cinnamoylglycine;Edulitine;Methyl 1-methoxy-1H-indole-3-carboxylate;3-Indolehydracrylic acid;5-Ethyl-5-phenyl-1,3-oxazolidine-2,4-dione;Methyl oxindole-3-acetate;Pyridoxaminium(1+);N-Hydroxy-1-aminonaphthalene;1-Amino-2-naphthol;2-Quinolinylmethanol;4-Amino-1-naphthol;Indole-3-carboxaldehyde;1-Hydroxyisoquinoline;4-Hydroxyquinoline;4,1-Benzoxazepine;2-aceto-2-hydroxy-butanoate	11428	71131.3	18583.7	28971.7	13518.3	12843.9	41402.3	72969.3	41352.9	16090.3	8184.56	62914.9	47822.1	12472.9	32431.5	34522.4	100448	136635	131272	25818.7	33182.6	36171.4	44935.8	61616	38243.7	49204.2	68223.5	37821.1	46079	32834.7	59323.3	0.5535	down	0.00973605	0.0801523	1.60548	yes
NEG	NEG_205.035_1.3707	205.035	1.3707	NA	NA	NA	NA	NA	NA	NA	NA	2-Methylcitric acid;(R)-Lipoic acid;Homocitric acid;Methylisocitric acid;(S)-Lipoic acid;3-(Carboxymethyl)-3-hydroxypentanedioic acid;2-Methoxypropane-1,2,3-tricarboxylic acid;Thioctic acid;Glucose ketone;Oxoadipic acid;3-Oxoadipic acid;2-Methyl-4-oxopentanedioic acid;2-(2-Oxopropanoyloxy)propanoic acid;(2R,3S)-2,3-dimethylmalate;Oxoglutaric acid;3-Oxoglutaric acid;Di-2-propenyl disulfide, 9CI;(E…	685373	642205	974175	711204	1.12816e+06	261891	318980	162265	914321	1.13965e+06	862892	1.12061e+06	493085	261084	60833.6	33101	40159.9	21789.9	14367.3	17455.3	50709.8	54587.7	40959.8	82830.5	35044.1	75351.4	49054.3	41739	367639	691135	44141.7	15.6572	up	4.47217e-12	1.23167e-08	4.25255	yes
NEG	NEG_205.942_4.4582	205.942	4.4582	NA	NA	NA	NA	NA	NA	NA	NA	2,4-Dichloro-6-nitrophenol;2,6-Dichloro-4-nitrophenol	246331	214245	157795	232051	238458	109201	75306.8	28879.6	183766	127526	95901.1	141307	78092.4	180148	75997.5	72299	97938.9	279424	55746.7	70470.5	69319.6	81689.7	63932.9	45754.5	10183.1	94388.9	51340.1	60015.7	115625	150643	80607.2	1.8689	up	0.00833106	0.0714814	1.55508	yes
NEG	NEG_206.082_3.5327	206.082	3.5327	NA	NA	NA	NA	NA	NA	NA	NA	N-Acetyl-L-phenylalanine;Phenylpropionylglycine;3-Phenylpropionylglycine;N-isopropylterephthalamic acid;2-Acetamido-4-methylphenyl acetate;3,4-Dimethylhippuric acid;Methylone;N-Acetyl-DL-phenylalanine;THURFYL NICOTINATE;Moroxydine;(R)-Boschniakine;1-(2,3-Dihydro-1H-pyrrolizin-5-yl)-2-propen-1-one;3-[(5-Methyl-2-furanyl)methyl]-1H-pyrrole;3,4-Dihydro-4-[(5-methyl-2-furanyl)methylene]-2H-pyrrole;1-…	128184	52446.9	79593.3	74467.7	85975.9	61107	71086.6	76817	56606.1	81749.5	81132.3	49432	42950	38759.7	29476.3	50562	24528.3	57913.4	52689	40722	58619.4	49370.2	33643.1	67110.1	78817.9	44117.4	47874.9	55391.9	59683.7	70022	49345.4	1.419	up	0.00761385	0.0671229	1.11135	yes
NEG	NEG_206.938_0.8262	206.938	0.8262	NA	NA	NA	NA	NA	NA	NA	NA	1-Propanol, 3,3,3-trichloro-;2,2,2-Trichloroethanol;1,1,2-Trichloroethanol	538655	118861	202605	359283	595991	458238	580711	511678	218744	128684	422185	208833	148043	113266	605621	1.15283e+06	667557	969829	782446	601197	919117	682920	1.06827e+06	705945	856569	763041	564450	856913	564375	328984	799765	0.4114	down	2.61458e-05	0.00113743	2.35158	yes
NEG	NEG_207.938_4.4584	207.938	4.4584	NA	NA	NA	NA	NA	NA	NA	NA	NA	134022	125398	86115.9	136942	145181	69708.2	51988.3	19663.6	94096.6	79573.5	51715.1	78796	40163.7	112934	39109	45084.4	65149.7	154023	33633.4	48783.8	47166.6	49072.9	38853.2	23230.1	2310.78	50629.5	26689	43736.4	67634.6	87592.7	47676.6	1.8372	up	0.0160857	0.114162	1.55487	yes
NEG	NEG_208.382_8.0305	208.382	8.0305	NA	NA	NA	NA	NA	NA	NA	NA	NA	466602	120097	139234	263155	571959	404937	139845	136128	157880	504529	213768	43885.4	361001	604626	69184.8	177172	104234	57635.2	105953	143433	126539	93772.5	88849.5	24884.5	257100	133387	112207	325180	212399	294832	129967	2.2685	up	0.00821395	0.0708646	1.68645	yes
NEG	NEG_208.986_1.0684	208.986	1.0684	NA	NA	NA	NA	NA	NA	NA	NA	cis-Aconitic acid;trans-Aconitic acid;Dehydroascorbic acid;2,5-Dimethyl-3-(methyldithio)furan;Dehydroascorbide(1-);Aconitic acid;p-TOLUENESULFONYL FLUORIDE;Phenylmethylsulfonyl fluoride;Pentafluoropropionic acid	356179	292862	950191	482001	717377	338127	340897	297366	703657	707705	703688	703776	453430	308199	327650	288105	346817	274060	300637	317470	355731	289055	366837	300980	312403	300237	289486	319129	419430	525390	313471	1.676	up	0.00154042	0.0215567	1.42316	yes
NEG	NEG_209.118_6.1954	209.118	6.1954	NA	71.49	C12H18O3	Lipids and lipid-like molecules	Fatty Acyls	HMDB0032797	C08491	map00592(alpha-Linolenic acid metabolism);map01060(Biosynthesis of plant secondary metabolites);map01070(Biosynthesis of plant hormones);map01100(Metabolic pathways);map01110(Biosynthesis of secondary metabolites);map04075(Plant hormone signal transduction)	Sedanonic acid;Dihydro-3-(2-octenyl)-2,5-furandione;(R)-8-Acetoxycarvotanacetone;1-Benzyloxy-1-(2-methoxyethoxy)ethane;4-(Butoxymethyl)-2-methoxyphenol;Isoamyl 2-furonpropionate;Dihydro-3-(1-octenyl)-2,5-furandione;3-Ethenyl-2,5-dimethyl-4-oxohex-5-en-2-yl acetate;7-Epijasmonic acid;(2S,4R,5S)-Muscarine;1-(1-Methoxy-1-methylethyl)-4-methylbenzene;Benzyl butyl ether;trans-Jasmone;5-Phenyl-1-pentan…	633843	16890.7	647691	251411	384789	1.0515e+06	269209	1.44772e+06	567031	677740	475606	7.63718e+06	129874	129410	1.83052e+06	2.647e+06	442578	374532	2.07399e+06	1.12749e+06	1.67011e+06	811422	1.05475e+06	1.20285e+06	1.19215e+06	1.42539e+06	1.45922e+06	773915	1.15735e+06	1.02285e+06	1.29185e+06	0.7918	down	0.0246273	0.151287	1.86255	yes
NEG	NEG_210.038_0.8201	210.038	0.8201	NA	NA	NA	NA	NA	NA	NA	NA	Benzo[d][2,1]benzothiazepine;2-n-Propylthiazolidine-4-carboxylic acid;D-Xylonate;L-Xylonate	1.03597e+06	1.15932e+06	866327	953312	1.15227e+06	609558	1.58914e+06	1.59576e+06	1.92228e+06	1.08256e+06	1.27384e+06	915059	1.04726e+06	1.80718e+06	2.40817e+06	2.94174e+06	2.27264e+06	2.02756e+06	2.21878e+06	2.40123e+06	2.05431e+06	2.24635e+06	2.06115e+06	2.27932e+06	2.64316e+06	1.95207e+06	1.59555e+06	1.95483e+06	1.71667e+06	1.21499e+06	2.21835e+06	0.5477	down	1.74049e-06	0.000163165	1.95228	yes
NEG	NEG_210.104_4.1906	210.104	4.1906	NA	NA	NA	NA	NA	NA	NA	NA	Varenicline;3-Amino-1,4-dimethyl-5H-pyrido[4,3-b]indole;1-Phenylcyclohexylamine	26949	44368.7	1711.55	1696.87	4545.15	8856.27	1882.59	90936.9	6336.84	64660.5	5534.99	45296.7	2007.13	2104.15	107205	125290	22493.9	509851	96030.6	32341.6	78912.7	362212	22485.9	314950	167092	283806	1913.67	52719.4	88721.1	21920.5	155522	0.1409	down	0.000451048	0.00930907	3.13698	yes
NEG	NEG_212.173_7.0465	212.173	7.0465	NA	NA	NA	NA	NA	NA	NA	NA	NA	31174	39028.6	9377.34	21113.1	13476.8	10374.6	62136.6	126260	222745	100701	20190	24483.4	33232.6	83103.9	217482	370831	514418	204045	210274	198969	202324	216245	426949	346598	332010	260696	222120	124975	165905	56957	274853	0.2072	down	2.0729e-06	0.000185633	3.37181	yes
NEG	NEG_212.173_7.3444	212.173	7.3444	NA	NA	NA	NA	NA	NA	NA	NA	NA	982762	118083	629515	116487	85656.1	1.33275e+06	869781	826448	1.58825e+06	974409	445800	5.01155e+06	81375	221982	3.6906e+06	3.20249e+06	2.88106e+06	1.16113e+06	2.49962e+06	1.20867e+06	2.21045e+06	1.53201e+06	1.8052e+06	1.70955e+06	4.90773e+06	1.49619e+06	4.19812e+06	2.34441e+06	1.719e+06	948918	2.48909e+06	0.3812	down	0.000523568	0.0102799	2.68054	yes
NEG	NEG_213.017_0.7465	213.017	0.7465	NA	NA	NA	NA	NA	NA	NA	NA	Deoxyribose 5-phosphate;1-Deoxy-D-xylulose 5-phosphate;Deoxyribose 1-phosphate;Deoxyribose 5-monophosphate;5-Deoxyribose-1-phosphate;8-Chlorotheophylline;Glucose chloride;Gluconolactone;2-Keto-3-deoxy-D-gluconic acid;3-Keto-b-D-galactose;Galactonolactone;Melizame;D-Arabino-hexos-2-ulose;Methylthiomethyl 2-methylbutanethiolate;D-Gulono-1,4-lactone;D-Gluconic acid, delta-lactone;(3R,4R,5S,6R)-3,4,5…	1.04026e+07	6.22546e+06	5.20659e+06	6.24858e+06	8.10071e+06	5.85596e+06	6.7151e+06	5.61818e+06	7.00819e+06	6.87094e+06	7.05176e+06	5.25728e+06	5.25999e+06	5.27496e+06	5.02965e+06	3.58021e+06	4.74764e+06	4.61174e+06	4.60166e+06	4.1655e+06	6.44742e+06	4.40438e+06	4.0739e+06	5.21187e+06	6.09134e+06	3.66975e+06	4.38418e+06	5.08633e+06	5.61435e+06	6.50688e+06	4.72183e+06	1.378	up	0.00011212	0.00350362	1.21907	yes
NEG	NEG_213.149_5.7331	213.149	5.7331	NA	85.52	C12H22O3	NA	NA	NA	NA	NA	3-Oxododecanoic acid;4-Acetoxy-2-hexyltetrahydrofuran;10-Undecenal;(+/-)-trans- and cis-4,8-Dimethyl-3,7-nonadien-2-ol;10-Undecen-2-one;(1R,2R)-1,2,7,7-Tetramethylbicyclo[2.2.1]heptan-2-ol;9-Undecenal;2-Undecenal;alpha-Terpineol;Eucalyptol;Geraniol;2-Decenal;3-Decen-2-one;2,6-Dimethyl-7-octen-3-one;Thujyl alcohol;9-Decenal;Fenchol;(-)-Carvomenthone;Isomenthone;(-)-Borneol;(-)-Menthone;p-Menthan-2…	1.86089e+06	2.04639e+06	2.17825e+06	3.24034e+06	1.84288e+06	4.45127e+06	2.40058e+06	1.91713e+06	4.02832e+06	1.66925e+06	1.59875e+06	7.05862e+06	1.27985e+06	1.17664e+06	9.86089e+06	5.10696e+06	5.94511e+06	4.86391e+06	4.16144e+06	3.8547e+06	3.51909e+06	3.6368e+06	5.01404e+06	9.5729e+06	4.95393e+06	3.53615e+06	6.55625e+06	3.83489e+06	3.97022e+06	2.62494e+06	5.3155e+06	0.4938	down	7.90567e-05	0.00265758	1.97279	yes
NEG	NEG_213.149_6.2373	213.149	6.2373	NA	91.74	C12H22O3	Organic acids and derivatives	Hydroxy acids and derivatives	NA	NA	NA	3-Oxododecanoic acid;4-Acetoxy-2-hexyltetrahydrofuran;10-Undecenal;(+/-)-trans- and cis-4,8-Dimethyl-3,7-nonadien-2-ol;10-Undecen-2-one;(1R,2R)-1,2,7,7-Tetramethylbicyclo[2.2.1]heptan-2-ol;9-Undecenal;2-Undecenal;alpha-Terpineol;Eucalyptol;Geraniol;2-Decenal;3-Decen-2-one;2,6-Dimethyl-7-octen-3-one;Thujyl alcohol;9-Decenal;Fenchol;(-)-Carvomenthone;Isomenthone;(-)-Borneol;(-)-Menthone;p-Menthan-2…	734814	815954	1.40683e+06	1.23519e+06	799987	1.80884e+06	1.22687e+06	1.74091e+06	1.38287e+06	1.30897e+06	1.39952e+06	1.54414e+06	106461	761108	2.58043e+06	3.52498e+06	2.39079e+06	1.0545e+06	1.52684e+06	1.0349e+06	1.09045e+06	1.22529e+06	1.77273e+06	2.58305e+06	1.71521e+06	1.57721e+06	4.51381e+06	2.08749e+06	1.60536e+06	1.16232e+06	2.04841e+06	0.5674	down	0.0124082	0.0950534	1.4886	yes
NEG	NEG_214.022_1.3754	214.022	1.3754	NA	NA	NA	NA	NA	NA	NA	NA	Tiamenidine;3-Methyl-2-benzothiazolone hydrazone;(1R)-1-Amino-3-sulfanylpropane-1-sulfinic acid	83319.6	86679.4	64350.3	75676.8	88822	151368	163246	180683	262138	74937.6	63758	67215.6	145495	119296	150024	279284	176001	618671	276811	179177	201613	259217	138900	312342	328545	168862	136869	234397	181704	116213	247194	0.4701	down	7.74921e-05	0.00262487	1.9102	yes
NEG	NEG_214.049_0.8256	214.049	0.8256	NA	NA	NA	NA	NA	NA	NA	NA	Glycerylphosphorylethanolamine;sn-glycero-3-Phosphoethanolamine;6-Oxo-1-phenyl-1,6-dihydropyridine-3-carboxylic acid;Glucosamine;Fructosamine;7-Aminomethyl-7-carbaguanine;beta-D-Glucosamine;(2R,3R,4S,5R)-2-Amino-3,4,5,6-tetrahydroxyhexanal;1-Aminoglucose;beta-D-Galactosamine;9-Ethylguanine;Fructosylamine;Tricine;Phosphodimethylethanolamine;1-Naphthyl isocyanate;N-Methylethanolaminium phosphate;Cy…	793131	1.0396e+06	1.2514e+06	1.37021e+06	1.38643e+06	722423	1.13013e+06	1.22317e+06	1.6993e+06	836416	535616	899385	1.77879e+06	1.56648e+06	518975	633172	742549	721484	1.08192e+06	1.0869e+06	1.11169e+06	739295	600179	1.01257e+06	1.22827e+06	529939	424993	714769	977828	1.15946e+06	796193	1.4563	up	0.00769778	0.0675497	1.14313	yes
NEG	NEG_214.077_1.1131	214.077	1.1131	NA	NA	NA	NA	NA	NA	NA	NA	NA	19912.7	30213.8	85593.8	150372	19684.8	346587	200879	114693	104395	21080.9	7808.18	207044	118080	67192.2	131391	210649	90229.7	183032	315839	98719.7	104515	70526.9	124293	178116	223339	110180	117026	128820	127865	106681	149048	0.7157	down	0.0366939	0.192783	1.60028	yes
NEG	NEG_214.153_5.736	214.153	5.736	NA	NA	NA	NA	NA	NA	NA	NA	NA	195875	189362	240606	303955	207105	534429	246593	209212	447473	220113	188716	782861	150028	151735	1.20779e+06	496446	692099	392712	484751	392000	371682	469975	417037	1.09505e+06	522233	541369	724825	407324	438691	290576	586807	0.4952	down	0.000104306	0.00329034	1.92917	yes
NEG	NEG_214.153_6.2373	214.153	6.2373	NA	NA	NA	NA	NA	NA	NA	NA	NA	18248.2	29887.2	128740	120096	35343.4	171042	131183	197578	149412	129598	128184	146449	16756.6	36933.9	357829	440874	252507	72596.6	199777	78033.5	71877.5	145710	200931	330615	150191	211599	359538	218292	161779	102818	220741	0.4658	down	0.0047707	0.0481483	1.91576	yes
NEG	NEG_216.036_0.7473	216.036	0.7473	NA	NA	NA	NA	NA	NA	NA	NA	N,N-Bis(2-chloroethyl)aniline;6-Chloro-2,3,4,5-tetrahydro-1H-3-benzazepine	2.35715e+07	1.81812e+07	1.69536e+07	1.76353e+07	1.83151e+07	1.69538e+07	2.44441e+07	1.80621e+07	1.78046e+07	2.00457e+07	2.00099e+07	1.70125e+07	1.78387e+07	1.60179e+07	1.43431e+07	1.33923e+07	1.23333e+07	1.48628e+07	1.45214e+07	1.30818e+07	1.47764e+07	1.38588e+07	1.33189e+07	1.70827e+07	1.41425e+07	1.12384e+07	1.465e+07	1.45824e+07	1.63939e+07	1.87747e+07	1.40132e+07	1.3398	up	3.44683e-07	4.3287e-05	1.29806	yes
NEG	NEG_216.168_6.0428	216.168	6.0428	NA	NA	NA	NA	NA	NA	NA	NA	NA	82829.3	70972.8	127129	77900.3	92555.8	426569	59442.4	53618.2	273786	42663.9	102967	817681	18456.9	11166.5	936631	336776	431967	278167	405931	299616	254598	293107	319025	746098	539311	316119	673189	372140	302158	161267	443048	0.364	down	0.000185406	0.00500949	2.77907	yes
NEG	NEG_217.108_3.1384	217.108	3.1384	NA	NA	NA	NA	NA	NA	NA	NA	3-Hydroxysebacic acid;2-Hydroxydecanedioic acid;5-Hydroxysebacate;Tetrahydrofurfuryl butyrate;cis-3-Hexenyl lactate;3-Methylbutyl 3-oxobutanoate;Butyl levulinate;Butyl 3-hydroxy-2-methylidenebutanoate;2-Methylpropyl 3-hydroxy-2-methylidenebutanoate;5-Pentyl-1,4-dioxan-2-one;6-Pentyl-1,4-dioxan-2-one;4-Hydroperoxy-2-nonenal;9-Oxo-nonanoic acid;cis-4-Hydroxycyclohexylacetic acid;trans-4-Hydroxycycl…	71525.7	38361.5	26010.9	75187.5	25758.8	17697.7	49797.9	94820.3	18595.3	65112.2	53992.9	22524.3	19516.1	30803.2	25538	17402.2	25728.3	32735.7	22456.8	16595.2	32220.5	24470.8	22261.1	36766.9	18841.9	7220.14	12950.1	17127.9	32929.3	43550.3	22308.2	1.9522	up	0.00521414	0.0512423	1.46139	yes
NEG	NEG_218.033_0.75	218.033	0.75	NA	NA	NA	NA	NA	NA	NA	NA	NA	7.5415e+06	5.94118e+06	5.14714e+06	5.5403e+06	5.17018e+06	5.69303e+06	7.96117e+06	5.62436e+06	5.36107e+06	6.27935e+06	6.68658e+06	5.24373e+06	5.33059e+06	5.0958e+06	4.71759e+06	3.89331e+06	3.93008e+06	5.44797e+06	4.75883e+06	3.43384e+06	4.87957e+06	4.4999e+06	4.29131e+06	5.58433e+06	4.44767e+06	3.78342e+06	4.3064e+06	4.53039e+06	5.18288e+06	5.90114e+06	4.46462e+06	1.3218	up	1.6762e-05	0.000858217	1.20554	yes
NEG	NEG_219.034_0.7482	219.034	0.7482	NA	NA	NA	NA	NA	NA	NA	NA	1-Propenyl 1-(1-propenylthio)propyl disulfide;4-(7H-Purin-6-ylsulfanyl)but-3-en-2-one;2-(3'-methylthio)propylmalate;3-(3'-methylthio)propylmalate;Isoflurophate;Tyrphostin A1;Thiacremonone	954131	789104	759384	791325	815643	593596	856924	716452	595937	1.01455e+06	912977	703517	459551	685869	622448	438310	301786	510462	454337	419794	445872	637648	453454	616771	316453	349084	465916	394643	609855	760640	459070	1.6569	up	2.22463e-06	0.000196121	1.66579	yes
NEG	NEG_220.028_1.2681	220.028	1.2681	NA	NA	NA	NA	NA	NA	NA	NA	S-(3-Oxo-3-carboxy-n-propyl)cysteine;S-(2-Oxo-2-carboxyethyl)homocysteine	89624.4	113624	103024	101153	232222	761164	394373	234328	117878	116023	86608.6	151617	137785	170675	1.90216e+06	558921	717750	660366	1.24345e+06	1.43058e+06	974418	870495	1.86795e+06	1.31773e+06	2.0803e+06	1.26301e+06	957550	562239	686322	200721	1.17192e+06	0.1713	down	2.20712e-09	8.39463e-07	3.43645	yes
NEG	NEG_220.119_0.7639	220.119	0.7639	NA	NA	NA	NA	NA	NA	NA	NA	N-(2,3,4-Trihydroxybutyl)-L-valine;p-Hydroxyphenylethylbiguanide;L-argininium(1+);N-(2-Hydroxypropyl)valine;N-(3-Hydroxypropyl)valine;Statine;L-Carnitine;beta-Hydroxy-gamma-trimethylaminobutyric acid;N-(2-Hydroxyethyl)valine	1.21561e+06	417842	497892	743271	772639	568446	723712	1.06794e+06	752563	827703	396000	685640	365616	710923	231593	581360	510393	639934	390455	750830	492930	322864	323463	540197	448953	423590	547813	491979	587220	696129	478311	1.4554	up	0.00846317	0.0721266	1.13683	yes
NEG	NEG_221.066_0.7617	221.066	0.7617	NA	NA	NA	NA	NA	NA	NA	NA	Ethyl glucuronide;2-Isopropylmalic acid;2,3-Dimethyl-3-hydroxyglutaric acid;3-Isopropylmalic acid;(&#177;)-Glycerol 1,2-diacetate;2-Hydroxyadipic acid;3-Hydroxyadipic acid;3-Hydroxymethylglutaric acid;2(R)-Hydroxyadipic acid;Levoglucosan;D-1-Deoxy-erythro-hexo-2,3-diulose;Diethyl dicarbonate;(-)-1-Methylpropyl 1-propenyl disulfide;D-1,5-Anhydrofructose;2-Hydroxy-2-ethylsuccinic acid;1,2,4-Benzotr…	3.61243e+06	1.76738e+06	1.50452e+06	2.19371e+06	1.37942e+06	4.58903e+06	2.68044e+06	1.80262e+06	1.40696e+06	2.05989e+06	1.98507e+06	1.70864e+06	1.56111e+06	1.64238e+06	1.11059e+06	1.21147e+06	902745	1.78808e+06	1.04979e+06	987701	1.28063e+06	1.12524e+06	1.12479e+06	1.29686e+06	960650	702120	1.37699e+06	1.34532e+06	1.64845e+06	2.13526e+06	1.16164e+06	1.8381	up	4.61753e-05	0.00179209	1.70936	yes
NEG	NEG_223.17_5.7849	223.17	5.7849	NA	90.75	C14H24O2	Lipids and lipid-like molecules	Fatty Acyls	NA	NA	NA	Linalyl isobutyrate;Linalyl butyrate;Ethyl (2E,6Z)-dodecadienoate;alpha-Terpineol butanoate;Isobornyl isobutyrate;Terpinyl isobutyrate;Allyl undecylenate;2-Propenyl cyclohexanepentanoate;Bornyl butyrate;Neryl butyrate;Geranyl 2-methylpropanoate;Lavandulyl butyrate;norspermine;(Z)-4-Heptenal;3-Hepten-2-one;(E)-4-Hepten-2-one;2-Hepten-4-one;2-Methylcyclohexanone;4-Methylcyclohexanone;5-Methyl-3-hex…	113896	338101	205291	226146	244765	679837	465633	285608	1.25632e+06	257719	179802	1.19356e+06	146788	13865.5	1.95261e+06	626442	2.33559e+06	627449	1.1275e+06	1.02802e+06	538182	542529	474210	1.78548e+06	1.33285e+06	637271	1.18052e+06	1.18653e+06	749376	400524	1.09823e+06	0.3647	down	0.000738187	0.0129299	2.50748	yes
NEG	NEG_224.085_0.8237	224.085	0.8237	NA	97	C7H16NO5P	Organic acids and derivatives	Carboxylic acids and derivatives	NA	NA	NA	N-Chloroacetyl-2,6-diethylaniline;2-Methyl-6-phenyl-3,7-dihydroimidazo[1,2-a]pyrazin-3-one;Drometrizole;Imidazo(1,2-a)pyrazin-3(7H)-one, 2-methyl-7-phenyl-;N-Methyl-beta-carboline-3-carboxamide;1-(Benzofuran-5-yl)-N-Methylpropan-2-aMine;2-(Dimethylaminomethyl)-1-phenyl-prop-2-en-1-one;Phenyl(piperidin-4-yl)methanone	6.01741e+06	5.5954e+06	2.76369e+06	2.35644e+06	5.71835e+06	1.74989e+06	3.28552e+06	768957	2.55592e+06	2.94543e+06	3.12683e+06	1.53073e+06	5.45551e+06	4.89211e+06	1.21945e+06	923388	2.61062e+06	710696	1.05031e+06	1.47777e+06	107487	2.12112e+06	1.50902e+06	1.59567e+06	1.20489e+06	1.18487e+06	740819	826348	2.35874e+06	3.48301e+06	1.23446e+06	2.8215	up	0.000303423	0.00719993	2.19409	yes
NEG	NEG_224.173_7.2625	224.173	7.2625	NA	NA	NA	NA	NA	NA	NA	NA	NA	1.99009e+06	1.84097e+06	5.77324e+06	2.05119e+06	2.5749e+06	1.32935e+07	1.47843e+06	2.22085e+06	1.31707e+07	2.25888e+06	1.09735e+06	1.98275e+07	854937	650590	2.80861e+07	6.28695e+06	2.45437e+07	1.03474e+07	9.88045e+06	1.00029e+07	6.98198e+06	8.68657e+06	7.68761e+06	2.28098e+07	2.35533e+07	1.11561e+07	2.17339e+07	6.3425e+06	9.54223e+06	4.93451e+06	1.41499e+07	0.3487	down	0.000165013	0.0046343	2.7055	yes
NEG	NEG_224.563_3.9836	224.563	3.9836	NA	NA	NA	NA	NA	NA	NA	NA	NA	1.15787e+07	6.0494e+06	2.88266e+06	7.47209e+06	7.44432e+06	3.08967e+06	7.60197e+06	5.04625e+06	9.63031e+06	1.79153e+06	3.34169e+06	9.5955e+06	2.78959e+06	4.33162e+06	2.10045e+06	4.24875e+06	3.56734e+06	5.28647e+06	2.51295e+06	4.19247e+06	2.36618e+06	1.61665e+06	3.31016e+06	2.45824e+06	2.54674e+06	2.58421e+06	2.05012e+06	4.21054e+06	4.48916e+06	5.90323e+06	3.07509e+06	1.9197	up	0.00420502	0.0440599	1.50519	yes
NEG	NEG_224.98_0.8392	224.98	0.8392	NA	NA	NA	NA	NA	NA	NA	NA	Chlorocitric acid;1-Naphthalenesulfonyl chloride;Oxalosuccinic acid;Allo-hydroxycitric acid lactone;oxalosuccinate;Thiophene, 2-nitroso-;Potassium salts of fatty acids	4.5352e+06	5.28623e+06	3.05385e+06	4.04063e+06	4.27462e+06	2.98826e+06	5.51091e+06	2.50194e+06	4.73028e+06	3.10243e+06	5.67537e+06	5.12874e+06	2.4576e+06	2.57084e+06	3.60923e+06	2.98481e+06	3.09086e+06	2.86182e+06	2.57452e+06	2.24525e+06	2.39788e+06	3.23669e+06	2.55269e+06	2.52145e+06	2.92097e+06	1.93757e+06	2.71927e+06	2.84112e+06	3.36968e+06	3.98978e+06	2.74958e+06	1.4511	up	0.00168499	0.0228259	1.21992	yes
NEG	NEG_225.052_5.4939	225.052	5.4939	NA	NA	NA	NA	NA	NA	NA	NA	3-Nitrotyrosine;5H-Indazole-5,5-dicarboxylicacid, 1,2,3,4,6,7-hexahydro-3-oxo-;Nitrotyrosine;3-Hydroxysuberic acid;Diethyl L-malate;6-(2-Hydroxyethoxy)-6-oxohexanoic acid;2,4-Dimethylthiazole;2,5-Dimethylthiazole;4,5-Dimethylthiazole;4-Isothiocyanato-1-butene;Thiiranepropanenitrile;2-Ethylthiazole;Butenyl isothiocyanate;Nicotinuric acid;Isonicotinylglycine;Picolinoylglycine;2'-Nitroacetanilide;3-…	70408.5	120498	55998	33474.2	130552	102714	137011	55783.1	80589.8	71093.9	63621.4	243995	70287.7	48278.5	46314.9	25657	27798.1	43600	49472.8	66804.9	43491	53033.1	63682.6	59030.5	50976.2	39135.8	36462.2	35946.6	68775.4	91736.2	45814.7	2.0023	up	0.000955492	0.0154363	1.73904	yes
NEG	NEG_225.069_4.0438	225.069	4.0438	NA	NA	NA	NA	NA	NA	NA	NA	7-Methyl-2-(2-furyl)-1,8-naphthyridine-4(1H)-one;beta-CCM;1-(4-Methoxyphenyl)-1-penten-3-one;3-(2-Methylpropylidene)-3alpha,4-dihydro-1(3H)-isobenzofuranone;(S)-3-Butyl-1(3H)-isobenzofuranone;Benzyl trans-2-methyl-2-butenoate;(R)-3,7-Dimethyl-5-indanecarboxylic acid;Ligustilide;Benzyl tiglate;Propyl cinnamate;Isopropyl cinnamate;Cinnamyl propionate;Precocene I;3-Butylidene-4,5-dihydrophthalide;Li…	1.59902e+06	4.47734e+06	831396	1.43634e+06	2.93544e+06	467160	3.08346e+06	3.61895e+06	5.61424e+06	154434	1.6095e+06	5.57885e+06	2.82762e+06	2.88006e+06	233846	1.40217e+06	764404	2.0391e+06	424680	2.89723e+06	710836	461294	361306	1.2394e+06	1.63488e+06	445616	320159	1.40165e+06	1.83751e+06	2.65099e+06	1.02404e+06	2.5888	up	0.0149111	0.10843	1.74513	yes
[truncated: 12,758 more rows]
